# Supplementary material
Source: MDPI journal article supplement (https://www.mdpi.com/2071-1050/14/23/15648)
Supplement: s1 [file s1]

## Supplementary information

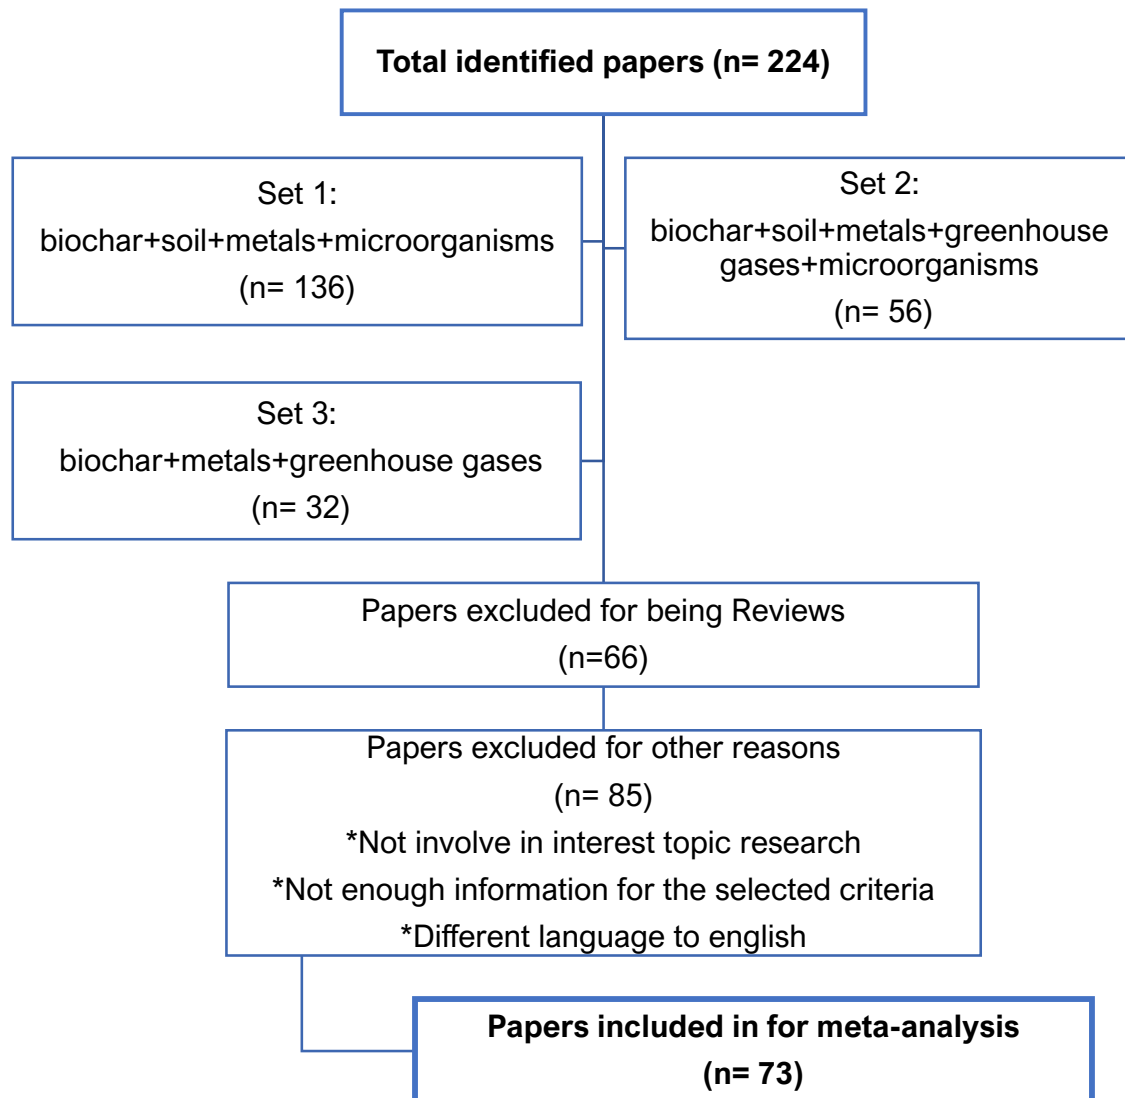

Figure S1. Selection path for meta-analysis included in the systematic study.

Table S1. Equations for the standardization of soil pH values.

|                                                               |
|---------------------------------------------------------------|
| $pH_{H_2O\ 1:2.5} = (pH_{H_2O\ 1:5} - 0.14)/0.99$             |
| $pH_{H_2O\ 1:5} = -1.95 + 11.58 * \log_{10}(pH_{kcl\ 1:2.5})$ |
| $pH_{kcl\ 1:5} = 0.09 + pH_{kcl\ 1:2.5}$                      |
| $pH_{H_2O\ 1:2.5} = (pH_{CaCl_2\ 1:2.5} + 0.9)/1.05$          |
