# Supplementary material
Source: MDPI journal article supplement (https://www.mdpi.com/2071-1050/14/23/15648)
Supplement: s1 [file s1]

Archive with 2 entries (2 files):
- Database_Biochar_Meta-analysis_AMPE.xlsx
- sustainability-1982887-supplementary.pdf
