# Supplementary material
Source: MDPI journal article supplement (https://www.mdpi.com/2071-1050/14/23/15648)
Supplement: s1 [file s1 › Database_Biochar_Meta-analysis_AMPE.xlsx]

## Sheet: Metadata
																																				initial	final			INITIAL									FINAL
Author(s)	Control / Test	Experiment type	Time (Days)	Time (months)	Experiment period	Biochar feedstock	Pyrolisis temperature (°C)	Pyrolosis temperature (°C) Group	Biochar pH	Biochar pH 1:5 water	Biochar EC (µS/cm)	Biochar EC (µS/cm) Group	Biochar SSA BET area (m2/g)	Biochar SSA BET area (m2/g) Group	Soil Texture	Soil texture description	Fertilized soil (yes/no)	pH inicial (T)	pH inicial (C)	pH final (T)	pH final ©	pH(initial) soil 1:2.5 water (T)	pH(initial) soil 1:2.5 water (C)	pH (initial) classification	pH(final) soil 1:2.5 water (T)	pH(final) soil 1:2.5 water (C)	pH (final) classification	pH measured method	Bulk density (g/cm3)	Conductivity (mm/hr)	Biochar rate (t/ha)	Biochar rate (%)	Soil EC (μS/cm)	Soil EC (μS/cm)	Carbon measurement method	% Soil Organic Carbon (SOC)	% Soil Organic Carbon (SOC)	Metal (oids)	Metal (oids) INICIAL/FINAL	Phosphorus (mg/kg)	Arsenic ( mg/kg)	Potasium (mg/kg)	Cadmium (mg/kg)	Lead (mg/kg)	Copper (mg/kg)	Nickel (mg/kg)	Zinc (mg/kg)	Cromium (mg/kg)	Cd (mg/kg) (T)
Wan et al., 2021	Control	POT	159	5.3	> 3 ≤ 1 año										Coarse	acidic sandy soil (94% sand, 3% silt, 3% clay)	yes	5.8	5.8			6.0188	6.0188	acid				ND	1.65	128.34		0			ND			P, Mg, Ca, Pb, Zn	INICIAL	200		30		15			20
Wan et al., 2021	test	POT	159	5.3	> 3 ≤ 1 año	Grass	600	501-700	7.9				247	high	Coarse	acidic sandy soil (94% sand, 3% silt, 3% clay)	yes	5.8	5.8			6.0188	6.0188	acid				ND	1.65	128.34		1			ND					200		30		15			20
Wan et al., 2021	test	POT	159	5.3	> 3 ≤ 1 año	Grass	600	501-700	7.9				247	high	Coarse	acidic sandy soil (94% sand, 3% silt, 3% clay)	yes	5.8	5.8			6.0188	6.0188	acid				ND	1.65	128.34		3			ND					200		30		15			20
Wan et al., 2021	control	POT	159	5.3	> 3 ≤ 1 año										Coarse	acidic sandy soil (94% sand, 3% silt, 3% clay)	yes	5.8	5.8			6.0188	6.0188	acid				ND	1.65	128.34		0			ND
Wan et al., 2021	test	POT	159	5.3	> 3 ≤ 1 año	Grass	600	501-700	7.9				247	high	Coarse	acidic sandy soil (94% sand, 3% silt, 3% clay)	yes	5.8	5.8			6.0188	6.0188	acid				ND	1.65	128.34		1			ND
Wan et al., 2021	test	POT	159	5.3	> 3 ≤ 1 año	Grass	600	501-700	7.9				247	high	Coarse	acidic sandy soil (94% sand, 3% silt, 3% clay)	yes	5.8	5.8			6.0188	6.0188	acid				ND	1.65	128.34		3			ND
Wan et al., 2021	control	POT	159	5.3	> 3 ≤ 1 año										Coarse	acidic sandy soil (94% sand, 3% silt, 3% clay)	yes	5.8	5.8			6.0188	6.0188	acid				ND	1.65	128.34		0			ND
Wan et al., 2021	test	POT	159	5.3	> 3 ≤ 1 año	Grass	600	501-700	7.9				247	high	Coarse	acidic sandy soil (94% sand, 3% silt, 3% clay)	yes	5.8	5.8			6.0188	6.0188	acid				ND	1.65	128.34		1			ND
Wan et al., 2021	test	POT	159	5.3	> 3 ≤ 1 año	Grass	600	501-700	7.9				247	high	Coarse	acidic sandy soil (94% sand, 3% silt, 3% clay)	yes	5.8	5.8			6.0188	6.0188	acid				ND	1.65	128.34		3			ND
Li et al., 2021	Control	INCUBATION	120	4	> 3 ≤ 1 año											HM-polluted soil	no	7.32	7.32	7.42	7.42	7.25253	7.25253	neutral	7.35354	7.35354	neutral	1:5 water				0			organic matter		0.45762	Cd, Pb, Zn	INICIAL				32	1906.4			2661		30
Li et al., 2021	test	INCUBATION	120	4	> 3 ≤ 1 año	Straw	600	501-700					47.75	low		HM-polluted soil	no	7.82	7.32	8.34	7.42	7.75758	7.25253	alcaline	8.28283	7.35354	alcaline	1:5 water				3			organic matter		1.7168	Cd, Pb, Zn	INICIAL				1.57	1660.2			2556.6		24.8312
Li et al., 2021	test	INCUBATION	120	4	> 3 ≤ 1 año	Straw	900	>700					65.25	medium		HM-polluted soil	no	7.92	7.32	8.53	7.42	7.85859	7.25253	alcaline	8.47475	7.35354	alcaline	1:5 water				3			organic matter		1.595	Cd, Pb, Zn	INICIAL				30.6	1558			2452.4		19.498
Li et al., 2021	test	INCUBATION	120	4	> 3 ≤ 1 año	Straw	600	501-700					72.18	medium		HM-polluted soil	no	7.88	7.32	8.51	7.42	7.81818	7.25253	alcaline	8.45455	7.35354	alcaline	1:5 water				3			organic matter		1.6472	Cd, Pb, Zn	INICIAL				28.6	1362.8			2250		18
Li et al., 2021	test	INCUBATION	120	4	> 3 ≤ 1 año	Straw	900	>700					106.87	medium		HM-polluted soil	no	7.96	7.32	8.63	7.42	7.89899	7.25253	alcaline	8.57576	7.35354	alcaline	1:5 water				3			organic matter		1.5109	Cd, Pb, Zn	INICIAL				27	1235.4			2125.8		15.392
Li et al., 2021	test	INCUBATION	120	4	> 3 ≤ 1 año	Straw	600	501-700					98.67	medium		HM-polluted soil	no	7.9	7.32	8.57	7.42	7.83838	7.25253	alcaline	8.51515	7.35354	alcaline	1:5 water				3			organic matter		1.58688	Cd, Pb, Zn	INICIAL				28.6	1277.8			2168		16.832
Li et al., 2021	test	INCUBATION	120	4	> 3 ≤ 1 año	Straw	900	>700					128.74	medium		HM-polluted soil	no	8.02	7.32	8.72	7.42	7.9596	7.25253	alcaline	8.66667	7.35354	alcaline	1:5 water				3			organic matter		1.4906	Cd, Pb, Zn	INICIAL				24.6	1168			2084		12.46
Ducey et al., 2021	control	POT	35	1.16667	≤ 3 meses										Medium	mining impacted soils	yes	4.4	4.4	4.4	4.4	4.6594	4.6594	acid	4.6594	4.6594	acid	1:1 water	1.5			0		2697	ND			Cd concentration, Zn	FINAL										2.05
Ducey et al., 2021	test	POT	35	1.16667	≤ 3 meses	Manure	500	300-500	9.5						Medium	mining impacted soils	yes	4.4	4.4	5.1	4.4	4.6594	4.6594	acid	5.3391	4.6594	acid	1:1 water	1.5			2.5		2622	ND			Cd concentration, Zn	FINAL										1.74
Ducey et al., 2021	test	POT	35	1.16667	≤ 3 meses	Manure	500	300-500	9.5						Medium	mining impacted soils	yes	4.4	4.4	5.3	4.4	4.6594	4.6594	acid	5.5333	4.6594	acid	1:1 water	1.5			2.5		4739	ND			Cd concentration, Zn	FINAL										1.08
Ducey et al., 2021	test	POT	35	1.16667	≤ 3 meses	Manure	500	300-500	9.5						Medium	mining impacted soils	yes	4.4	4.4	5.3	4.4	4.6594	4.6594	acid	5.5333	4.6594	acid	1:1 water	1.5			5		4371	ND			Cd concentration, Zn	FINAL										1.69
Ducey et al., 2021	test	POT	35	1.16667	≤ 3 meses	Manure	500	300-500	9.5						Medium	mining impacted soils	yes	4.4	4.4	5.9	4.4	4.6594	4.6594	acid	6.1159	4.6594	acid	1:1 water	1.5			5		5596	ND			Cd concentration, Zn	FINAL										0.93
Ducey et al., 2021	test	POT	35	1.16667	≤ 3 meses	Manure	500	300-500	9.1						Medium	mining impacted soils	yes	4.4	4.4	5.5	4.4	4.6594	4.6594	acid	5.7275	4.6594	acid	1:1 water	1.5			2.5		14257	ND			Cd concentration, Zn	FINAL										3.35
Ducey et al., 2021	test	POT	35	1.16667	≤ 3 meses	Manure	500	300-500	9.1						Medium	mining impacted soils	yes	4.4	4.4	5.9	4.4	4.6594	4.6594	acid	6.1159	4.6594	acid	1:1 water	1.5			2.5		15770	ND			Cd concentration, Zn	FINAL										1.49
Ducey et al., 2021	test	POT	35	1.16667	≤ 3 meses	Manure	500	300-500	9.1						Medium	mining impacted soils	yes	4.4	4.4	6.3	4.4	4.6594	4.6594	acid	6.5043	4.6594	acid	1:1 water	1.5			5		27670	ND			Cd concentration, Zn	FINAL										1.19
Ducey et al., 2021	test	POT	35	1.16667	≤ 3 meses	Manure	500	300-500	9.1						Medium	mining impacted soils	yes	4.4	4.4	6.6	4.4	4.6594	4.6594	acid	6.7956	4.6594	neutal	1:1 water	1.5			5		27657	ND			Cd concentration, Zn	FINAL										0.64
Campos et al., 2021	control	FIELD	730	24.3333	> 2 años										Coarse	Acidic polluted topsoil	no	3.85	3.85	4.6	4.6	4.56324	4.56324	acid	5.30435	5.30435	acid	1:5 0.01 M CaCl2			0			1900	Total carbon	0.6084	0.933725	Cd, Pb, Cu, Ni, Zn	INICIAL				1.28	569	240.6	15.6	249.3
Campos et al., 2021	test	FIELD	730	24.3333	> 2 años	Residues	500	300-500	9.34				382.5	high	Coarse	Acidic polluted topsoil	no	3.85	3.85	4.6	4.6	4.56324	4.56324	acid	5.30435	5.30435	acid	1:5 0.01 M CaCl2			8			2200	Total carbon		1.6393	Pb, Cu, Fe, Ni, As, Zn	FINAL				1.28	569	240.6	15.6	249.3
Campos et al., 2021	test	FIELD	730	24.3333	> 2 años	Residues	500	300-500	10.17				382.5	high	Coarse	Acidic polluted topsoil	no	3.85	3.85	4.7	4.6	4.56324	4.56324	acid	5.40316	5.30435	acid	1:5 0.01 M CaCl2			8			1900	Total carbon		1.9604	Pb, Cu, Fe, Ni, As, Zn	FINAL				1.28	569	240.6	15.6	249.3
Campos et al., 2021	test				> 2 años	Wood	620	501-700	9.7				382.5	high	Coarse	Acidic polluted topsoil	no											1:5 0.01 M CaCl2							ND			Pb, Cu, Fe, Ni, As, Zn	FINAL				1.28	569	240.6	15.6	249.3
Campos et al., 2021	control	FIELD	730	24.3333	> 2 años										Coarse	Moderatelly acidic polluted topsoil	no	4.82	4.82	6.4	6.4	5.52174	5.52174	acid	7.083	7.083	neutral	1:5 0.01 M CaCl2			0			300	Total carbon	7.605	1.4534	Cd, Pb, Cu, Ni, Zn	INICIAL				1.56	156.5	215.5	15.6	293.5
Campos et al., 2021	test	FIELD	730	24.3333	> 2 años	Residues	500	300-500	9.34				382.5	high	Coarse	Moderatelly acidic polluted topsoil	no	4.82	4.82	6.2	6.4	5.52174	5.52174	acid	6.88538	7.083	neutral	1:5 0.01 M CaCl2			8			100	Total carbon		1.79985	Pb, Cu, Fe, Ni, As, Zn	FINAL				1.56	156.5	215.5	15.6	293.5
Campos et al., 2021	test	FIELD	730	24.3333	> 2 años	Residues	500	300-500	10.17				382.5	high	Coarse	Moderatelly acidic polluted topsoil	no	4.82	4.82	6.4	6.4	5.52174	5.52174	acid	7.083	7.083	neutral	1:5 0.01 M CaCl2			8			100	Total carbon		2.05335	Pb, Cu, Fe, Ni, As, Zn	FINAL				1.56	156.5	215.5	15.6	293.5
Campos et al., 2021	test				> 2 años	Wood	620	501-700	9.7				382.5	high	Coarse	Moderatelly acidic polluted topsoil	no											1:5 0.01 M CaCl2							ND			Pb, Cu, Fe, Ni, As, Zn	FINAL				1.56	156.5	215.5	15.6	293.5
Campos et al., 2021	control	FIELD	730	24.3333	> 2 años										Coarse	Acidic polluted subsoil	no			5.1	5.1				5.79842	5.79842	acid	1:5 0.01 M CaCl2			0			500	Total carbon		0.7774
Campos et al., 2021	test	FIELD	730	24.3333	> 2 años	Residues	500	300-500	9.34				382.5	high	Coarse	Acidic polluted subsoil	no			5.2	5.1				5.89723	5.79842	acid	1:5 0.01 M CaCl2			8			1000	Total carbon		0.845
Campos et al., 2021	test	FIELD	730	24.3333	> 2 años	Residues	500	300-500	10.17				382.5	high	Coarse	Acidic polluted subsoil	no			5	5.1				5.6996	5.79842	acid	1:5 0.01 M CaCl2			8			800	Total carbon		0.78585
Campos et al., 2021	test				> 2 años	Wood	620	501-700	9.7				382.5	high	Coarse	Acidic polluted subsoil	no											1:5 0.01 M CaCl2							ND
Campos et al., 2021	control	FIELD	730	24.3333	> 2 años										Coarse	Moderatelly acidic polluted subsoil	no			6.5	6.5				7.18182	7.18182	neutral	1:5 0.01 M CaCl2			0			200	Total carbon		0.7605
Campos et al., 2021	test	FIELD	730	24.3333	> 2 años	Residues	500	300-500	9.34				382.5	high	Coarse	Moderatelly acidic polluted subsoil	no			6.3	6.5				6.98419	7.18182	neutral	1:5 0.01 M CaCl2			8			200	Total carbon		0.83655
Campos et al., 2021	test	FIELD	730	24.3333	> 2 años	Residues	500	300-500	10.17				382.5	high	Coarse	Moderatelly acidic polluted subsoil	no			6.5	6.5				7.18182	7.18182	neutral	1:5 0.01 M CaCl2			8			200	Total carbon		1.07315
Campos et al., 2021	test			0		Wood	620	501-700	9.7				382.5	high	Coarse	Moderatelly acidic polluted subsoil	no											1:5 0.01 M CaCl2							ND
Song et al., 2021	control	FIELD	181	6.03333	> 3 ≤ 1 año										Coarse	Cd-contaminated soils	yes			7.2	7.2				7.2	7.2	neutral	1:2 water			0				organic matter		1.0614	Cd concentration, Available K, Available P	FINAL										0.9
Song et al., 2021	test	FIELD	181	6.03333	> 3 ≤ 1 año	Residues	350 to500	300-500	9.12				78.6	medium	Coarse	Cd-contaminated soils	yes			7.4	7.2				7.4	7.2	neutral	1:2 water			18				organic matter		1.6182	Cd concentration, Available K, Available P	FINAL										0.62
Lan et al., 2021	control	INCUBATION	90	3	≤ 3 meses											heavy metal contaminated soil- barrer soil		5	5			5.242	5.242	acid				ND				0			organic matter	0.49648		P, As, K, Pb, Cu, Zn, Cr	AMBAS	3.51	701	101.23		496	502		274	127
Lan et al., 2021	test	INCUBATION	90	3	≤ 3 meses	Wood	350	300-500										5.35	5			5.58185	5.242	acid				ND				1		3240	ND			Pb, Cu, As, Zn, Cr	FINAL	3.51	701	101.23		496	502		274	127
Lan et al., 2021	test	INCUBATION	90	3	≤ 3 meses	Wood	350	300-500										5.8	5			6.0188	5.242	acid				ND				3		130	ND			Pb, Cu, As, Zn, Cr	FINAL	3.51	701	101.23		496	502		274	127
Lan et al., 2021	test	INCUBATION	90	3	≤ 3 meses	Wood	350	300-500										6.5	5			6.6985	5.242	neutral				ND				5		202	organic matter	0.74646		P, As, K, Pb, Cu, Zn, Cr	AMBAS	3.89		105.36
Hussain et al., 2021	Control	POT	75	2.5	≤ 3 meses											petroleum hydrocarbon-impacted soils	no	6.96	6.96	7.05	7.05	7.14516	7.14516	neutral	7.23255	7.23255	neutral	ND				0	12670	224	organic carbon-organic matter	0.91	1.41	P, K	AMBAS	15.81		20.23
Hussain et al., 2021	test	POT	75	2.5	≤ 3 meses	Residues	500	300-500	9.03		1670	high	31.54	low		petroleum hydrocarbon-impacted soils	no	7.06	6.96	7.16	7.05	7.24226	7.14516	neutral	7.33936	7.23255	neutral	ND				5	9940	237	organic carbon-organic matter	0.85	1.34	P, K	AMBAS	17.72		80.45
Hussain et al., 2021	test	POT	75	2.5	≤ 3 meses	Residues	500	300-500	9.03		1670	high	31.54	low		petroleum hydrocarbon-impacted soils	no	7.05	6.96	7.06	7.05	7.23255	7.14516	neutral	7.24226	7.23255	neutral	ND				5	11490	223	organic carbon-organic matter	1.09	1.47	P, K	AMBAS	17.12		100.65
Haddad & Lemanowicz, 2021	control	FIELD	90	3	≤ 3 meses										Fine	Clay soil	yes	7.7	7.7			7.7	7.7	alcaline				1:2.5 water	1.18		0		1220	617	organic carbon-organic matter	1.68		P, K, Cd, Pb, Ni	INICIAL	1160		12880	0.55	31.4		43.7
Haddad & Lemanowicz, 2021	test	FIELD	90	3	≤ 3 meses	Residues	600	501-700	6.31		651	Medium			Fine	Clay soil	yes	7.7	7.7			7.7	7.7	alcaline				1:2.5 water	1.18		20			627	ND					1160		12880	0.55	31.4		43.7
Haddad & Lemanowicz, 2021	test	FIELD	90	3	≤ 3 meses	Residues	600	501-700	6.31		651	Medium			Fine	Clay soil	yes	7.7	7.7			7.7	7.7	alcaline				1:2.5 water	1.18		40			651	ND					1160		12880	0.55	31.4		43.7
Haddad & Lemanowicz, 2021	control	FIELD	90	3	≤ 3 meses										Coarse	sandy soil	yes	8.5	8.5			8.5	8.5	alcaline				1:2.5 water	1.63		0		2580	748	organic carbon-organic matter	0.41		P, K, Cd, Pb, Ni	INICIAL	290		2700	3.9	52.7		44.3
Haddad & Lemanowicz, 2021	test	FIELD	90	3	≤ 3 meses	Residues	600	501-700	6.31		651	Medium			Coarse	sandy soil	yes	8.5	8.5			8.5	8.5	alcaline				1:2.5 water	1.63		20				ND
Haddad & Lemanowicz, 2021	test	FIELD	90	3	≤ 3 meses	Residues	600	501-700	6.31		651	Medium			Coarse	sandy soil	yes	8.5	8.5			8.5	8.5	alcaline				1:2.5 water	1.63		40			3000	ND
Bandara et al., 2021	control	INCUBATION	30	1	≤ 3 meses										Medium	sodosol	no	4.6	4.6	5	5	5.30435	5.30435	acid	5.6996	5.6996	acid	1:5 0.01 M CaCl2	1.3	6.327		0	131	2700	organic carbon	20.5	11	As, Cd	AMBAS		100		100						15
Bandara et al., 2021	control	INCUBATION	30	1	≤ 3 meses										Medium	sodosol	no	5.7	5.7	6	6	6.3913	6.3913	acid	6.68775	6.68775	neutral	1:5 0.01 M CaCl2	1.3	6.327		0			organic carbon		10	As, Cd	FINAL		100		100						4.8
Bandara et al., 2021	control	INCUBATION	30	1	≤ 3 meses										Medium	sodosol	no	6.4	6.4	6.5	6.5	7.083	7.083	neutral	7.18182	7.18182	neutral	1:5 0.01 M CaCl2	1.3	6.327		0			organic carbon		13	As, Cd	FINAL		100		100						3
Bandara et al., 2021	control	INCUBATION	30	1	≤ 3 meses										Medium	sodosol	no	7.1	7.1	7.4	7.4	7.7747	7.7747	alcaline	8.07115	8.07115	alcaline	1:5 0.01 M CaCl2	1.3	6.327		0		3000	organic carbon		16	As, Cd	FINAL		100		100						2
Bandara et al., 2021	control	INCUBATION	30	1	≤ 3 meses										Medium	sodosol	no	7.4	7.4	7.6	7.6	8.07115	8.07115	alcaline	8.26877	8.26877	alcaline	1:5 0.01 M CaCl2	1.3	6.327		0		2700	organic carbon		18	As, Cd	FINAL		100		100						2
Bandara et al., 2021	test	INCUBATION	30	1	≤ 3 meses	Manure	550	501-700	10.34	10.53	4010	high	264	high	Medium	sodosol	no	4.6	4.6	7	5	5.30435	5.30435	acid	7.67589	5.6996	alcaline	1:5 0.01 M CaCl2				3	131	40	organic carbon	20.5	32	As, Cd	AMBAS		100		100						3
Bandara et al., 2021	test	INCUBATION	30	1	≤ 3 meses	Manure	550	501-700	10.34	10.53	4010	high	264	high	Medium	sodosol	no	5.7	5.7	7.8	6	6.3913	6.3913	acid	8.4664	6.68775	alcaline	1:5 0.01 M CaCl2				3		40	organic carbon		23	As, Cd	FINAL		100		100						2
Bandara et al., 2021	test	INCUBATION	30	1	≤ 3 meses	Manure	550	501-700	10.34	10.53	4010	high	264	high	Medium	sodosol	no	6.4	6.4	8	6.5	7.083	7.083	neutral	8.66403	7.18182	alcaline	1:5 0.01 M CaCl2				3		40	organic carbon		18	As, Cd	FINAL		100		100						1.8
Bandara et al., 2021	test	INCUBATION	30	1	≤ 3 meses	Manure	550	501-700	10.34	10.53	4010	high	264	high	Medium	sodosol	no	7.1	7.1	8.5	7.4	7.7747	7.7747	alcaline	9.1581	8.07115	strongly alcaline	1:5 0.01 M CaCl2				3		1260	organic carbon		18	As, Cd	FINAL		100		100						1
Bandara et al., 2021	test	INCUBATION	30	1	≤ 3 meses	Manure	550	501-700	10.34	10.53	4010	high	264	high	Medium	sodosol	no	7.4	7.4	8.6	7.6	8.07115	8.07115	alcaline	9.25692	8.26877	strongly alcaline	1:5 0.01 M CaCl2				3		910	organic carbon		20	As, Cd	FINAL		100		100						1
	test	INCUBATION	30	1	≤ 3 meses	Wood	550	501-700	9.71	9.82	900	Medium	429	high	Medium	sodosol	no	4.6	4.6	6	5	5.30435	5.30435	acid	6.68775	5.6996	neutral	1:5 0.01 M CaCl2				3	131	1030	organic carbon	20.5	3	As, Cd	AMBAS		100		100						5
Bandara et al., 2021	test	INCUBATION	30	1	≤ 3 meses	Wood	550	501-700	9.71	9.82	900	Medium	429	high	Medium	sodosol	no	5.7	5.7	6.6	6	6.3913	6.3913	acid	7.28063	6.68775	neutral	1:5 0.01 M CaCl2				3		1080	organic carbon		5	As, Cd	FINAL		100		100						3
Bandara et al., 2021	test	INCUBATION	30	1	≤ 3 meses	Wood	550	501-700	9.71	9.82	900	Medium	429	high	Medium	sodosol	no	6.4	6.4	7	6.5	7.083	7.083	neutral	7.67589	7.18182	alcaline	1:5 0.01 M CaCl2				3		980	organic carbon		11	As, Cd	FINAL		100		100						2
Bandara et al., 2021	test	INCUBATION	30	1	≤ 3 meses	Wood	550	501-700	9.71	9.82	900	Medium	429	high	Medium	sodosol	no	7.1	7.1	7.6	7.4	7.7747	7.7747	alcaline	8.26877	8.07115	alcaline	1:5 0.01 M CaCl2				3		1190	organic carbon		13	As, Cd	FINAL		100		100						1.2
Bandara et al., 2021	test	INCUBATION	30	1	≤ 3 meses	Wood	550	501-700	9.71	9.82	900	Medium	429	high	Medium	sodosol	no	7.4	7.4	7.8	7.6	8.07115	8.07115	alcaline	8.4664	8.26877	alcaline	1:5 0.01 M CaCl2				3		1080	organic carbon		15	As, Cd	FINAL		100		100						1.3
Wang et al., 2021	control	INCUBATION	90	3	≤ 3 meses										Fine	Paddy field	no	5.57	5.57	5.6	5.6	5.57	5.57	acid	5.6	5.6	acid	1:2 water				0		900	ND			Cd	AMBAS				2.8						0.8
Wang et al., 2021	test	INCUBATION	90	3	≤ 3 meses	Straw	500	300-500	8.32						Fine	Paddy field	no	6.42	5.57	6.47	5.6	6.42	5.57	acid	6.47	5.6	acid	1:2 water				1		205	ND			Cd	FINAL				2.8						0.44
Wang et al., 2021	test	INCUBATION	90	3	≤ 3 meses	Straw	500	300-500	7.47						Fine	Paddy field	no	6.32	5.57	6.3	5.6	6.32	5.57	acid	6.3	5.6	acid	1:2 water				1		190	ND			Cd	FINAL				2.8						0.34
Wang et al., 2021	test	INCUBATION	90	3	≤ 3 meses	Straw	500	300-500	7.55						Fine	Paddy field	no	6.57	5.57	6.62	5.6	6.57	5.57	acid	6.62	5.6	neutral	1:2 water				1		238	ND			Cd	FINAL				2.8						0.24
Wang et al., 2021	test	INCUBATION	90	3	≤ 3 meses	Straw	500	300-500	8.39						Fine	Paddy field	no	6.57	5.57	6.68	5.6	6.57	5.57	acid	6.68	5.6	neutral	1:2 water				1		355	ND			Cd	FINAL				2.8						0.22
Wang et al., 2021	Control	INCUBATION	90	3	≤ 3 meses										Fine	Paddy field	no	5.75	5.75	6.1	6.1	5.75	5.75	acid	6.1	6.1	acid	1:2 water				0		135	ND			Cd	AMBAS				2.8						0.43
Wang et al., 2021	test	INCUBATION	90	3	≤ 3 meses	Straw	500	300-500	8.32						Fine	Paddy field	no	6.65	5.75	6.8	6.1	6.65	5.75	neutral	6.8	6.1	neutral	1:2 water				1		335	ND			Cd	FINAL				2.8						0.28
Wang et al., 2021	test	INCUBATION	90	3	≤ 3 meses	Straw	500	300-500	7.47						Fine	Paddy field	no	6.54	5.75	7	6.1	6.54	5.75	acid	7	6.1	neutral	1:2 water				1		350	ND			Cd	FINAL				2.8						0.16
Wang et al., 2021	test	INCUBATION	90	3	≤ 3 meses	Straw	500	300-500	7.55						Fine	Paddy field	no	6.7	5.75	6.88	6.1	6.7	5.75	neutral	6.88	6.1	neutral	1:2 water				1		115	ND			Cd	FINAL				2.8						0.05
Wang et al., 2021	test	INCUBATION	90	3	≤ 3 meses	Straw	500	300-500	8.39						Fine	Paddy field	no	6.66	5.75	6.9	6.1	6.66	5.75	neutral	6.9	6.1	neutral	1:2 water				1			ND			Cd	FINAL				2.8						0.1
Muhammad et al., 2021	control	INCUBATION	30	1	≤ 3 meses										Coarse	Cd-contaminated soil	no	7.3	7.3	7.34	7.34	7.3	7.3	neutral	7.34	7.34	neutral	1:2.5 water				0	4900	7480	organic matter	2.175	2.117	Cd	AMBAS				4.8						4.74
Muhammad et al., 2021	test	INCUBATION	30	1	≤ 3 meses	Straw	600	501-700	7.3		690	medium	0.5762	low	Coarse		no	7.37	7.3	7.41	7.34	7.37	7.3	neutral	7.41	7.34	neutral	1:2.5 water				1.5	5100	7700	organic matter		2.61	Cd	AMBAS				4.75						4.65
Muhammad et al., 2021	test	INCUBATION	30	1	≤ 3 meses	Straw	600	501-700	7.3		690	medium	0.5762	low	Coarse		no	7.39	7.3	7.46	7.34	7.39	7.3	neutral	7.46	7.34	neutral	1:2.5 water				3	5300	7900	organic matter		2.726	Cd	AMBAS				4.7						4.55
Muhammad et al., 2021	test	INCUBATION	30	1	≤ 3 meses	Straw	600	501-700	10.41		726	medium	15.6494	low	Coarse		no	7.4	7.3	7.61	7.34	7.4	7.3	neutral	7.61	7.34	alcaline	1:2.5 water				1.5	5050	7500	organic matter		2.436	Cd	AMBAS				4.5						4.17
Muhammad et al., 2021	test	INCUBATION	30	1	≤ 3 meses	Straw	600	501-700	10.41		726	medium	15.6494	low	Coarse		no	7.42	7.3	7.68	7.34	7.42	7.3	neutral	7.68	7.34	alcaline	1:2.5 water				3	5200	7650	organic matter		2.552	Cd	AMBAS				4.3						4.2
Muhammad et al., 2021	test	INCUBATION	30	1	≤ 3 meses	Straw	600	501-700	9.76		840	medium	3.7746	low	Coarse		no	7.42	7.3	7.63	7.34	7.42	7.3	neutral	7.63	7.34	alcaline	1:2.5 water				1.5	5150	7550	organic matter		2.784	Cd	AMBAS				4.25						4.12
Muhammad et al., 2021	test	INCUBATION	30	1	≤ 3 meses	Straw	600	501-700	9.76		840	medium	3.7746	low	Coarse		no	7.44	7.3	7.72	7.34	7.44	7.3	neutral	7.72	7.34	alcaline	1:2.5 water				3	5250	7900	organic matter		2.9	Cd	AMBAS				4.2						4.1
Muhammad et al., 2021	control	INCUBATION	60	2	≤ 3 meses										Coarse	Cd-contaminated soil	no	7.3	7.3	7.44	7.44	7.3	7.3	neutral	7.44	7.44	neutral	1:2.5 water				0	4900	7750	organic matter	2.175	2.088	Cd	AMBAS				4.8						4.65
Muhammad et al., 2021	test	INCUBATION	60	2	≤ 3 meses	Straw	600	501-700	7.3		690	medium	0.5762	low	Coarse		no	7.37	7.3	7.49	7.44	7.37	7.3	neutral	7.49	7.44	neutral	1:2.5 water				1.5	5100	7850	organic matter		2.784	Cd	AMBAS				4.75						4.54
Muhammad et al., 2021	test	INCUBATION	60	2	≤ 3 meses	Straw	600	501-700	7.3		690	medium	0.5762	low	Coarse		no	7.39	7.3	7.5	7.44	7.39	7.3	neutral	7.5	7.44	neutral	1:2.5 water				3	5300	7800	organic matter		2.552	Cd	AMBAS				4.7						4.45
Muhammad et al., 2021	test	INCUBATION	60	2	≤ 3 meses	Straw	600	501-700	10.41		726	medium	15.6494	low	Coarse		no	7.4	7.3	7.8	7.44	7.4	7.3	neutral	7.8	7.44	alcaline	1:2.5 water				1.5	5050	7900	organic matter		2.262	Cd	AMBAS				4.5						3.9
Muhammad et al., 2021	test	INCUBATION	60	2	≤ 3 meses	Straw	600	501-700	10.41		726	medium	15.6494	low	Coarse		no	7.42	7.3	7.85	7.44	7.42	7.3	neutral	7.85	7.44	alcaline	1:2.5 water				3	5200	7880	organic matter		2.5694	Cd	AMBAS				4.3						3.74
Muhammad et al., 2021	test	INCUBATION	60	2	≤ 3 meses	Straw	600	501-700	9.76		840	medium	3.7746	low	Coarse		no	7.42	7.3	7.84	7.44	7.42	7.3	neutral	7.84	7.44	alcaline	1:2.5 water				1.5	5150	7990	organic matter		2.813	Cd	AMBAS				4.25						3.68
Muhammad et al., 2021	test	INCUBATION	60	2	≤ 3 meses	Straw	600	501-700	9.76		840	medium	3.7746	low	Coarse		no	7.44	7.3	7.9	7.44	7.44	7.3	neutral	7.9	7.44	alcaline	1:2.5 water				3	5250	8000	organic matter		2.842	Cd	AMBAS				4.2						3.61
Muhammad et al., 2021	control	INCUBATION	90	3	≤ 3 meses										Coarse	Cd-contaminated soil	no	7.3	7.3	7.44	7.44	7.3	7.3	neutral	7.44	7.44	neutral	1:2.5 water				0	4900	7503	organic matter	2.175	1.972	Cd	AMBAS				4.8						4.65
Muhammad et al., 2021	test	INCUBATION	90	3	≤ 3 meses	Straw	600	501-700	7.3		690	medium	0.5762	low	Coarse		no	7.37	7.3	7.53	7.44	7.37	7.3	neutral	7.53	7.44	neutral	1:2.5 water				1.5	5100	7680	organic matter		2.668	Cd	AMBAS				4.75						4.3
Muhammad et al., 2021	test	INCUBATION	90	3	≤ 3 meses	Straw	600	501-700	7.3		690	medium	0.5762	low	Coarse		no	7.39	7.3	7.58	7.44	7.39	7.3	neutral	7.58	7.44	neutral	1:2.5 water				3	5300	7700	organic matter		2.61	Cd	AMBAS				4.7						4.2
Muhammad et al., 2021	test	INCUBATION	90	3	≤ 3 meses	Straw	600	501-700	10.41		726	medium	15.6494	low	Coarse		no	7.4	7.3	7.89	7.44	7.4	7.3	neutral	7.89	7.44	alcaline	1:2.5 water				1.5	5050	7850	organic matter		2.262	Cd	AMBAS				4.5						3.8
Muhammad et al., 2021	test	INCUBATION	90	3	≤ 3 meses	Straw	600	501-700	10.41		726	medium	15.6494	low	Coarse		no	7.42	7.3	7.98	7.44	7.42	7.3	neutral	7.98	7.44	alcaline	1:2.5 water				3	5200	7900	organic matter		2.378	Cd	AMBAS				4.3						3.55
Muhammad et al., 2021	test	INCUBATION	90	3	≤ 3 meses	Straw	600	501-700	9.76		840	medium	3.7746	low	Coarse		no	7.42	7.3	7.94	7.44	7.42	7.3	neutral	7.94	7.44	alcaline	1:2.5 water				1.5	5150	7980	organic matter		2.552	Cd	AMBAS				4.25						3.5
Muhammad et al., 2021	test	INCUBATION	90	3	≤ 3 meses	Straw	600	501-700	9.76		840	medium	3.7746	low	Coarse		no	7.44	7.3	8.2	7.44	7.44	7.3	neutral	8.2	7.44	alcaline	1:2.5 water				3	5250	8050	organic matter		2.668	Cd	AMBAS				4.2						3.4
Nissen et al., 2021	control	POT	21	0.7	≤ 3 meses										Coarse	Sandy Loam	no	5.4	5.4	5.4	5.4	6.00095	6.00095	acid	6.00095	6.00095	acid	1:2.5 0.01 M CaCl2	1.35			0			organic matter	0.018
Nissen et al., 2021	test	POT	21	0.7	≤ 3 meses	Straw	725	>700	10.2						Coarse	Sandy Loam	no	5.4	5.4	7.6	5.4	6.00095	6.00095	acid	8.10019	6.00095	alcaline	1:2.5 0.01 M CaCl2	1.35			10			ND
Nissen et al., 2021	test	POT	21	0.7	≤ 3 meses	Straw	750	>700	8.5						Coarse	Sandy Loam	no	5.4	5.4	7.8	5.4	6.00095	6.00095	acid	8.29103	6.00095	alcaline	1:2.5 0.01 M CaCl2	1.35			10			ND
Nissen et al., 2021	test	POT	21	0.7	≤ 3 meses	Wood	725	>700	9.6						Coarse	Sandy Loam	no	5.4	5.4	6.3	5.4	6.00095	6.00095	acid	6.85973	6.00095	neutral	1:2.5 0.01 M CaCl2	1.35			10			ND
Nissen et al., 2021	test	POT	21	0.7	≤ 3 meses	Wood	700	501-700	9.4						Coarse	Sandy Loam	no	5.4	5.4	6.8	5.4	6.00095	6.00095	acid	7.33683	6.00095	neutral	1:2.5 0.01 M CaCl2	1.35			10			ND
Nissen et al., 2021	test	POT	21	0.7	≤ 3 meses	Wood	475	300-500	9.5						Coarse	Sandy Loam	no	5.4	5.4	5.8	5.4	6.00095	6.00095	acid	6.38263	6.00095	acid	1:2.5 0.01 M CaCl2	1.35			10			ND
Lebrun et al., 2021	control	POT	69	2.3	≤ 3 meses										Coarse	Technosol	no	3.7	3.7	3.66	3.66	3.9797	3.9797	strongly acid	3.94086	3.94086	strongly acid	1:1 water	1.608	37.478		0			total carbon	1.508	0.14365	Pb, Fe, As	INICIAL		1060			23390
Lebrun et al., 2021	control	POT	69	2.3	≤ 3 meses										Coarse	Technosol	no	3.7	3.7	3.78	3.78	3.9797	3.9797	strongly acid	4.05738	4.05738	strongly acid	1:1 water	1.608	37.478		0			total carbon		0.09295	Pb, Fe, As			1060			23390
Lebrun et al., 2021	test	POT	69	2.3	≤ 3 meses	Wood	500	300-500	8.98		432	medium	43.91	low	Coarse	Technosol	no	3.7	3.7	7.43	3.66	3.9797	3.9797	strongly acid	7.60153	3.94086	alcaline	1:1 water	1.608	37.478		5			total carbon		3.62505	Pb, Fe, As	FINAL		1060			23390
Lebrun et al., 2021	test	POT	69	2.3	≤ 3 meses	Wood	500	300-500	8.98		432	medium	43.91	low	Coarse	Technosol	no	3.7	3.7	7.47	3.78	3.9797	3.9797	strongly acid	7.64037	4.05738	alcaline	1:1 water	1.608	37.478		5			total carbon		3.3293	Pb, Fe, As	FINAL		1060			23390
Zhang et al., 2021	Control																	4.4	4.4	4.3	4.3	4.4	4.4	strongly acid	4.3	4.3	strongly acid	1:2.5 water							organic matter	2.10308	2.10308	P, Mg, Cd concentration, Pb, Cu, Fe, Ni, Zn, Cr, K	FINAL	427.6									0.74
Zhang et al., 2021	test	FIELD	300	10	> 3 meses ≤ 1 año	Straw	400	300-500	7.61								yes	4.4	4.4	4.03	4.3	4.4	4.4	strongly acid	4.03	4.3	strongly acid	1:2.5 water							organic matter		2.21328	Mg, Cd concentration, Pb, Cu, Fe, Ni, Zn, Cr, K	FINAL	427.6									0.62
Zhang et al., 2021	test	FIELD	300	10	> 3 meses ≤ 1 año	Straw	400	300-500	7.61								yes	4.4	4.4	4.15	4.3	4.4	4.4	strongly acid	4.15	4.3	strongly acid	1:2.5 water							organic matter		3.34704	Mg, Cd concentration, Pb, Cu, Fe, Ni, Zn, Cr, K	FINAL	427.6									0.65
Zhang et al., 2021	test	FIELD	300	10	> 3 meses ≤ 1 año	Straw	400	300-500	7.61								yes	4.4	4.4	4.37	4.3	4.4	4.4	strongly acid	4.37	4.3	strongly acid	1:2.5 water							organic matter		2.57926	Mg, Cd concentration, Pb, Cu, Fe, Ni, Zn, Cr, K	FINAL	427.6									0.61
Li et al., 2020	control	POT	30	1	≤ 3 meses											heavy metals-polluted soil	no	5.98	5.98	5.68	5.68	5.89899	5.89899	acid	5.59596	5.59596	acid	1:5 water				0	0.21	0.22	organic matter	36.1514		Cd Concentration, Cu, As, Zn	AMBAS		55.07		0.46		50.15		100.55		0.05627
Li et al., 2020	test	POT	30	1	≤ 3 meses	Residues	500	300-500	9.1		0.16	low	60.18	medium			no	5.98	5.98	6.27	5.68				6.19192	5.59596	acid	1:5 water				5		0.16	ND			As, Cd, Cu, Zn	FINAL		55.07		0.46		50.15		100.55		0.01848
Li et al., 2020	test	POT	30	1	≤ 3 meses	Residues	500	300-500	9.1		0.16	low	60.18	medium			no	5.98	5.98	6.67	5.68				6.59596	5.59596	neutral	1:5 water				5		0.58	ND			Cd Concentration, Cu, As, Zn	FINAL		55.07		0.46		50.15		100.55		0.00753
Terekhova et al., 2021	control	POT	30	1	≤ 3 meses										Fine	clay loamy agrosoddypodzolic soils	no	6.74	6.74	6.74	6.74	6.63908	6.63908	neutral	6.63908	6.63908	neutral	1:4 water				0			organic carbon	3.86		Pb, Cu, Zn,	INICIAL					23.7	22		89.1
Terekhova et al., 2021	test	POT	30	1	≤ 3 meses	Wood			8.9						Fine	clay loamy agrosoddypodzolic soils	no	6.74	6.74	6.74	6.74	6.63908	6.63908	neutral	6.63908	6.63908	neutral	1:4 water				5			ND									23.7	22		89.1
Terekhova et al., 2021	test	POT	30	1	≤ 3 meses	Wood			8.9						Fine	clay loamy agrosoddypodzolic soils	no	6.74	6.74	6.74	6.74	6.63908	6.63908	neutral	6.63908	6.63908	neutral	1:4 water				5			ND									23.7	22		89.1
Terekhova et al., 2021	test	POT	30	1	≤ 3 meses	Wood			8.9						Fine	clay loamy agrosoddypodzolic soils	no	6.74	6.74	6.74	6.74	6.63908	6.63908	neutral	6.63908	6.63908	neutral	1:4 water				5			ND			Pb, Cu, Zn	INICIAL					650	660		1100
Terekhova et al., 2021	test	POT	30	1	≤ 3 meses	Wood			8.9						Fine	clay loamy agrosoddypodzolic soils	no	6.74	6.74	6.74	6.74	6.63908	6.63908	neutral	6.63908	6.63908	neutral	1:4 water				5			ND			Pb, Cu, Zn	INICIAL					650	660		1100
Terekhova et al., 2021	control	POT	30	1	≤ 3 meses										Fine	clay loamy agrosoddypodzolic soils	no	6.28	6.28	6.28	6.28	6.18046	6.18046	acid	6.18046	6.18046	acid	1:4 water				0			organic carbon	1.3		Pb, Cu, Zn	INICIAL					10.1	9.3		32
Terekhova et al., 2021	test	POT	30	1	≤ 3 meses	Wood			8.9						Fine	clay loamy agrosoddypodzolic soils	no	6.28	6.28	6.28	6.28	6.18046	6.18046	acid	6.18046	6.18046	acid	1:4 water				5			ND									10.1	9.3		32
Terekhova et al., 2021	test	POT	30	1	≤ 3 meses	Wood			8.9						Fine	clay loamy agrosoddypodzolic soils	no	6.28		6.28		6.18046		acid	6.18046		acid	1:4 water				5			ND									10.1	9.3		32
Terekhova et al., 2021	test	POT	30	1	≤ 3 meses	Wood			8.9						Fine	clay loamy agrosoddypodzolic soils	no	6.28		6.28		6.18046		acid	6.18046		acid	1:4 water				5			ND			Pb, Cu, Zn	INICIAL					650	660		1100
Terekhova et al., 2021	test	POT	30	1	≤ 3 meses	Wood			8.9						Fine	clay loamy agrosoddypodzolic soils	no	6.28		6.28		6.18046		acid	6.18046		acid	1:4 water				5			ND			Pb, Cu, Zn	INICIAL					650	660		1100
Morugan-Coronado et al., 2020	control	POT	365	12.1667	> 1 año ≤ años										Fine	Technosol	no	8.4	8.4	3.65	3.65	8.4	8.4	alcaline	3.65	3.65	strongly acid	1:2.5 water	1.01			0		3240	organic carbon / total carbon	1.19	0.74	As, Cd, Pb, Zn	INICIAL		0.05		0.4	125			225		0.0153
Morugan-Coronado et al., 2020	test	POT	365	12.1667	> 1 año ≤ años	Manure	500	300-500	10.52		3990	high			Fine	Technosol	no	8.4	8.4	7.84	3.65	8.4	8.4	alcaline	7.84	3.65	alcaline	1:2.5 water	1.01			0.5		130	organic carbon / total carbon		2.05	Cd concentration, As, Zn	FINAL		0.05		0.4	125			225		0.00552
Morugan-Coronado et al., 2020	test	POT	365	12.1667	> 1 año ≤ años	Manure	500	300-500	10.52		3990	high			Fine	Technosol	no	8.4	8.4	7.68	3.65	8.4	8.4	alcaline	7.68	3.65	alcaline	1:2.5 water	1.01			0.5		202	organic carbon / total carbon		2.96	Cd concentration, As, Zn	FINAL		0.05		0.4	125			225		0.00666
Morugan-Coronado et al., 2020	test	POT	365	12.1667	> 1 año ≤ años	Manure	500	300-500	10.52		3990	high			Fine	Technosol	no	8.4	8.4	7.62	3.65	8.4	8.4	alcaline	7.62	3.65	alcaline	1:2.5 water	1.01			0.5		224	organic carbon / total carbon		3.18	Cd concentration, As, Zn	FINAL		0.05		0.4	125			225		0.0072
Morugan-Coronado et al., 2020	test	POT	365	12.1667	> 1 año ≤ años	Manure	500	300-500	10.52		3990	high			Fine	Technosol	no	8.4	8.4	7.85	3.65	8.4	8.4	alcaline	7.85	3.65	alcaline	1:2.5 water	1.01			1		237	organic carbon / total carbon		2.71	Cd concentration, As, Zn	FINAL		0.05		0.4	125			225		0.00389
Morugan-Coronado et al., 2020	test	POT	365	12.1667	> 1 año ≤ años	Manure	500	300-500	10.52		3990	high			Fine	Technosol	no	8.4	8.4	7.65	3.65	8.4	8.4	alcaline	7.65	3.65	alcaline	1:2.5 water	1.01			1		223	organic carbon / total carbon		3.68	Cd concentration, As, Zn	FINAL		0.05		0.4	125			225		0.0065
Morugan-Coronado et al., 2020	test	POT	365	12.1667	> 1 año ≤ años	Manure	500	300-500	10.52		3990	high			Fine	Technosol	no	8.4	8.4	7.64	3.65	8.4	8.4	alcaline	7.64	3.65	alcaline	1:2.5 water	1.01			1		617	organic carbon / total carbon		3.96	Cd concentration, As, Zn	FINAL		0.05		0.4	125			225		0.00941
Simiele et al., 2020	control	POT	32	1.06667	≤ 3 meses										Coarse	Acidic sandy soil	no	4.82	4.82	5.3	5.3	4.82	4.82	acid	5.3	5.3	acid	1:2.5 water				0		627	organic carbon		2.99	P, As, K, Pb	INICIAL	1.1	539.06	15.8		11453.6
Simiele et al., 2020	test	POT	32	1.06667	≤ 3 meses	Wood	500	300-500	8.46		302	medium	4.38	low	Coarse	Acidic sandy soil	no	4.82	4.82	6.9	5.3	4.82	4.82	acid	6.9	5.3	neutral	1:2.5 water				2.5		651	organic carbon		5.47	Pb, As	FINAL	1.1	539.06	15.8		11453.6
Simiele et al., 2020	test	POT	32	1.06667	≤ 3 meses	Wood	500	300-500	8.46		302	medium	4.38	low	Coarse	Acidic sandy soil	no	4.82	4.82	6.9	5.3	4.82	4.82	acid	6.9	5.3	neutral	1:2.5 water				2.5		748	organic carbon		6.73	Pb, As	FINAL	1.1	539.06	15.8		11453.6
Bouhia et al., 2021	control	POT	90	3	≤ 3 meses										Fine	alkaline soil	yes	8.19	8.19	8.18	8.18	8.13131	8.13131	alcaline	8.12121	8.12121	alcaline	1:5 water				0		0.43	organic carbon	1.61	1.06	Zn	FINAL
Bouhia et al., 2021	test	POT	90	3	≤ 3 meses	Wood			8.75		400	medium			Fine	alkaline soil	yes	8.34	8.19	8.48	8.18	8.28283	8.13131	alcaline	8.42424	8.12121	alcaline	1:5 water				1.2		1.44	organic carbon		3.18	Zn	FINAL
Mierzwa‑Hersztek et al., 2019	control	POT	254	8.5	> 3 meses ≤ 1 año										Coarse	typical brown soil with the granulometric composition of loamy sand (85% sand, 9% silt, and 6% clay)	yes	4.68	4.68	4.65	4.65	4.68	4.68	acid	4.65	4.65	acid	1:2.5 water	1.67	60.127		0	54	130	total carbon	0.532096	0.521618	Cd, Pb, Cu, Zn	AMBAS				0.02	0.21	0.043		0.313		0.017
Mierzwa‑Hersztek et al., 2020	test	POT	254	8.46667	> 3 meses ≤ 1 año	Straw	300	300-500	6.52	6.52	3780	high	0.67	low	Coarse	typical brown soil with the granulometric composition of loamy sand (85% sand, 9% silt, and 6% clay)	yes	5.67	4.68	5.23	4.65	5.67	4.68	acid	5.23	4.65	acid	1:2.5 water	1.67	60.127		0.2		202	total carbon		0.611104	Cd, Pb, Cu, Zn	FINAL				0.02	0.21	0.043		0.313		0.02
Mierzwa‑Hersztek et al., 2019	test	POT	254	8.46667	> 3 meses ≤ 1 año	Straw	300	300-500	6.52	6.52	3780	high	0.67	low	Coarse	typical brown soil with the granulometric composition of loamy sand (85% sand, 9% silt, and 6% clay)	yes	5.67	4.68	5.57	4.65	5.67	4.68	acid	5.57	4.65	acid	1:2.5 water	1.67	60.127		0.5		224	total carbon		0.766837	Cd, Pb, Cu, Zn	FINAL				0.02	0.21	0.043		0.313		0.02
Mierzwa‑Hersztek et al., 2019	test	POT	254	8.46667	> 3 meses ≤ 1 año	Straw	300	300-500	6.52	6.52	3780	high	0.67	low	Coarse	typical brown soil with the granulometric composition of loamy sand (85% sand, 9% silt, and 6% clay)	yes	5.67	4.68	5.68	4.65	5.67	4.68	acid	5.68	4.65	acid	1:2.5 water	1.67	60.127		1		237	total carbon		1.09343	Cd, Pb, Cu, Zn	FINAL				0.02	0.21	0.043		0.313		0.02
Mierzwa‑Hersztek et al., 2019	test	POT	254	8.46667	> 3 meses ≤ 1 año	Straw	300	300-500	6.52	6.52	3780	high	0.67	low	Coarse	typical brown soil with the granulometric composition of loamy sand (85% sand, 9% silt, and 6% clay)	yes	5.67	4.68	6.05	4.65	5.67	4.68	acid	6.05	4.65	acid	1:2.5 water	1.67	60.127		2		223	total carbon		1.24553	Cd, Pb, Cu, Zn	FINAL				0.02	0.21	0.043		0.313		0.013
Mierzwa‑Hersztek et al., 2019	test	POT	254	8.46667	> 3 meses ≤ 1 año	Straw	300	300-500	6.52	6.52	3780	high	0.67	low	Coarse	typical brown soil with the granulometric composition of loamy sand (85% sand, 9% silt, and 6% clay)	yes	5.67	4.68	4.7	4.65	5.67	4.68	acid	4.7	4.65	acid	1:2.5 water	1.67	60.127		0.2		617	total carbon		0.568939	Cd, Pb, Zn, Cu	AMBAS				0.19	37.9	1.85		16.5		0.027
Mierzwa‑Hersztek et al., 2019	test	POT	254	8.46667	> 3 meses ≤ 1 año	Straw	300	300-500	6.52	6.52	3780	high	0.67	low	Coarse	typical brown soil with the granulometric composition of loamy sand (85% sand, 9% silt, and 6% clay)	yes	5.67	4.68	4.83	4.65	5.67	4.68	acid	4.83	4.65	acid	1:2.5 water	1.67	60.127		0.5		627	total carbon		0.769541	Cd, Pb, Zn	FINAL				0.19	37.9	1.85		16.5		0.02
Mierzwa‑Hersztek et al., 2019	test	POT	254	8.46667	> 3 meses ≤ 1 año	Straw	300	300-500	6.52	6.52	3780	high	0.67	low	Coarse	typical brown soil with the granulometric composition of loamy sand (85% sand, 9% silt, and 6% clay)	yes	5.67	4.68	4.97	4.65	5.67	4.68	acid	4.97	4.65	acid	1:2.5 water	1.67	60.127		1		651	total carbon		1.03344	Cd, Pb, Zn	FINAL				0.19	37.9	1.85		16.5		0.02
Mierzwa‑Hersztek et al., 2019	test	POT	254	8.46667	> 3 meses ≤ 1 año	Straw	300	300-500	6.52	6.52	3780	high	0.67	low	Coarse	typical brown soil with the granulometric composition of loamy sand (85% sand, 9% silt, and 6% clay)	yes	5.67	4.68	5.29	4.65	5.67	4.68	acid	5.29	4.65	acid	1:2.5 water	1.67	60.127		2		748	total carbon		1.39425	Cd, Pb, Zn, Cu	FINAL				0.19	37.9	1.85		16.5		0.01
Zhang et al., 2020	control	POT	81	2.7												paddy soil		7.81	7.81	6.96	6.96	7.81	7.81	alcaline	6.96	6.96	neutral	1:2.5 water				0			organic matter	3.2786		P, As	INICIAL	8.6	138
Zhang et al., 2020	test	POT	81	2.7	≤ 3 meses	Residues	600	300-500	8.91				60.16	medium				7.81	7.81	7.07	6.96	7.81	7.81	alcaline	7.07	6.96	neutral	1:2.5 water				0.5			ND					8.6	138
Zhang et al., 2020	test	POT	81	2.7	≤ 3 meses	Residues	600	300-500	8.91				60.16	medium		paddy soil		7.81	7.81	6.95	6.96	7.81	7.81	alcaline	6.95	6.96	neutral	1:2.5 water				1			ND					8.6	138
Zhang et al., 2020	test	POT	81	2.7	≤ 3 meses	Residues	600	300-500	8.91				60.16	medium		paddy soil		7.81	7.81	6.83	6.96	7.81	7.81	alcaline	6.83	6.96	neutral	1:2.5 water				2			ND					8.6	138
Zhang et al., 2020	test	POT	81	2.7	≤ 3 meses	Residues	600	300-500	9.41				27.16	low		paddy soil		7.81	7.81	6.59	6.96	7.81	7.81	alcaline	6.59	6.96	acid	1:2.5 water				0.5			ND					8.6	138
Zhang et al., 2020	test	POT	81	2.7	≤ 3 meses	Residues	600	300-500	9.41				27.16	low		paddy soil		7.81	7.81	6.34	6.96	7.81	7.81	alcaline	6.34	6.96	acid	1:2.5 water				1			ND					8.6	138
Zhang et al., 2020	test	POT	81	2.7	≤ 3 meses	Residues	600	300-500	9.41				27.16	low		paddy soil		7.81	7.81	6.83	6.96	7.81	7.81	alcaline	6.83	6.96	neutral	1:2.5 water				2			ND					8.6	138
Zhang et al., 2020	test	POT	81	2.7	≤ 3 meses	Residues	600	300-500	9.64				36.21	low		paddy soil		7.81	7.81	7.07	6.96	7.81	7.81	alcaline	7.07	6.96	neutral	1:2.5 water				0.5			ND					8.6	138
Zhang et al., 2020	test	POT	81	2.7	≤ 3 meses	Residues	600	300-500	9.64				36.21	low		paddy soil		7.81	7.81	6.59	6.96	7.81	7.81	alcaline	6.59	6.96	acid	1:2.5 water				1			ND					8.6	138
Zhang et al., 2020	test	POT	81	2.7	≤ 3 meses	Residues	600	300-500	9.64				36.21	low		paddy soil		7.81	7.81	6.71	6.96	7.81	7.81	alcaline	6.71	6.96	neutral	1:2.5 water				2			ND					8.6	138
Zhang et al., 2020	test	POT	81	2.7	≤ 3 meses	Residues	600	300-500	9.72				46.87	low		paddy soil		7.81	7.81	7.07	6.96	7.81	7.81	alcaline	7.07	6.96	neutral	1:2.5 water				0.5			ND					8.6	138
Zhang et al., 2020	test	POT	81	2.7	≤ 3 meses	Residues	600	300-500	9.72				46.87	low		paddy soil		7.81	7.81	6.59	6.96	7.81	7.81	alcaline	6.59	6.96	acid	1:2.5 water				1			ND					8.6	138
Zhang et al., 2020	test	POT	81	2.7	≤ 3 meses	Residues	600	300-500	9.72				46.87	low		paddy soil		7.81	7.81	6.83	6.96	7.81	7.81	alcaline	6.83	6.96	neutral	1:2.5 water				2			ND					8.6	138
Zhang et al., 2020	control	POT														paddy soil		7.25	7.25	7.02	7.02	7.25	7.25	neutral	7.02	7.02	neutral	1:2.5 water				0			organic matter	3.2617		P, As	INICIAL	8.47	92
Zhang et al., 2020	test	POT	81	2.7	≤ 3 meses	Residues	600	300-500	8.91				60.16	medium		paddy soil		7.25	7.25	6.87	7.02	7.25	7.25	neutral	6.87	7.02	neutral	1:2.5 water				0.5			ND					8.47	92
Zhang et al., 2020	test	POT	81	2.7	≤ 3 meses	Residues	600	300-500	8.91				60.16	medium		paddy soil		7.25	7.25	6.87	7.02	7.25	7.25	neutral	6.87	7.02	neutral	1:2.5 water				1			ND					8.47	92
Zhang et al., 2020	test	POT	81	2.7	≤ 3 meses	Residues	600	300-500	8.91				60.16	medium		paddy soil		7.25	7.25	7.37	7.02	7.25	7.25	neutral	7.37	7.02	neutral	1:2.5 water				2			ND					8.47	92
Zhang et al., 2020	test	POT	81	2.7	≤ 3 meses	Residues	600	300-500	9.41				27.16	low		paddy soil		7.25	7.25	7.22	7.02	7.25	7.25	neutral	7.22	7.02	neutral	1:2.5 water				0.5			ND					8.47	92
Zhang et al., 2020	test	POT	81	2.7	≤ 3 meses	Residues	600	300-500	9.41				27.16	low		paddy soil		7.25	7.25	7.08	7.02	7.25	7.25	neutral	7.08	7.02	neutral	1:2.5 water				1			ND					8.47	92
Zhang et al., 2020	test	POT	81	2.7	≤ 3 meses	Residues	600	300-500	9.41				27.16	low		paddy soil		7.25	7.25	7.25	7.02	7.25	7.25	neutral	7.25	7.02	neutral	1:2.5 water				2			ND					8.47	92
Zhang et al., 2020	test	POT	81	2.7	≤ 3 meses	Residues	600	300-500	9.64				36.21	low		paddy soil		7.25	7.25	7.57	7.02	7.25	7.25	neutral	7.57	7.02	neutral	1:2.5 water				0.5			ND					8.47	92
Zhang et al., 2020	test	POT	81	2.7	≤ 3 meses	Residues	600	300-500	9.64				36.21	low		paddy soil		7.25	7.25	7.43	7.02	7.25	7.25	neutral	7.43	7.02	neutral	1:2.5 water				1			ND					8.47	92
Zhang et al., 2020	test	POT	81	2.7	≤ 3 meses	Residues	600	300-500	9.64				36.21	low		paddy soil		7.25	7.25	6.5	7.02	7.25	7.25	neutral	6.5	7.02	acid	1:2.5 water				2			ND					8.47	92
Zhang et al., 2020	test	POT	81	2.7	≤ 3 meses	Residues	600	300-500	9.72				46.87	low		paddy soil		7.25	7.25	6.82	7.02	7.25	7.25	neutral	6.82	7.02	neutral	1:2.5 water				0.5			ND					8.47	92
Zhang et al., 2020	test	POT	81	2.7	≤ 3 meses	Residues	600	300-500	9.72				46.87	low		paddy soil		7.25	7.25	7.15	7.02	7.25	7.25	neutral	7.15	7.02	neutral	1:2.5 water				1			ND					8.47	92
Zhang et al., 2020	test	POT	81	2.7	≤ 3 meses	Residues	600	300-500	9.72				46.87	low		paddy soil		7.25	7.25	7.16	7.02	7.25	7.25	neutral	7.16	7.02	neutral	1:2.5 water				2			ND					8.47	92
Zhang et al., 2020	control	POT														paddy soil		6.08	6.08	7.02	7.02	6.08	6.08	acid	7.02	7.02	neutral	1:2.5 water	ND			0			organic matter	3.13495		P, As	INICIAL	5.03	33
Zhang et al., 2020	test	POT	81	2.7	≤ 3 meses	Residues	600	300-500	8.91				60.16	medium		paddy soil		6.08	6.08	7.32	7.02	6.08	6.08	acid	7.32	7.02	neutral	1:2.5 water				0.5			ND					5.03	33
Zhang et al., 2020	test	POT	81	2.7	≤ 3 meses	Residues	600	300-500	8.91				60.16	medium		paddy soil		6.08	6.08	7.17	7.02	6.08	6.08	acid	7.17	7.02	neutral	1:2.5 water				1			ND					5.03	33
Zhang et al., 2020	test	POT	81	2.7	≤ 3 meses	Residues	600	300-500	8.91				60.16	medium		paddy soil		6.08	6.08	7.02	7.02	6.08	6.08	acid	7.02	7.02	neutral	1:2.5 water				2			ND					5.03	33
Zhang et al., 2020	test	POT	81	2.7	≤ 3 meses	Residues	600	300-500	9.41				27.16	low		paddy soil		6.08	6.08	7.47	7.02	6.08	6.08	acid	7.47	7.02	neutral	1:2.5 water				0.5			ND					5.03	33
Zhang et al., 2020	test	POT	81	2.7	≤ 3 meses	Residues	600	300-500	9.41				27.16	low		paddy soil		6.08	6.08	7.32	7.02	6.08	6.08	acid	7.32	7.02	neutral	1:2.5 water				1			ND					5.03	33
Zhang et al., 2020	test	POT	81	2.7	≤ 3 meses	Residues	600	300-500	9.41				27.16	low		paddy soil		6.08	6.08	7.47	7.02	6.08	6.08	acid	7.47	7.02	neutral	1:2.5 water				2			ND					5.03	33
Zhang et al., 2020	test	POT	81	2.7	≤ 3 meses	Residues	600	300-500	9.64				36.21	low		paddy soil		6.08	6.08	7.32	7.02	6.08	6.08	acid	7.32	7.02	neutral	1:2.5 water				0.5			ND					5.03	33
Zhang et al., 2020	test	POT	81	2.7	≤ 3 meses	Residues	600	300-500	9.64				36.21	low		paddy soil		6.08	6.08	7.47	7.02	6.08	6.08	acid	7.47	7.02	neutral	1:2.5 water				1			ND					5.03	33
Zhang et al., 2020	test	POT	81	2.7	≤ 3 meses	Residues	600	300-500	9.64				36.21	low		paddy soil		6.08	6.08	7.47	7.02	6.08	6.08	acid	7.47	7.02	neutral	1:2.5 water				2			ND					5.03	33
Zhang et al., 2020	test	POT	81	2.7	≤ 3 meses	Residues	600	300-500	9.72				46.87	low		paddy soil		6.08	6.08	7.32	7.02	6.08	6.08	acid	7.32	7.02	neutral	1:2.5 water				0.5			ND					5.03	33
Zhang et al., 2020	test	POT	81	2.7	≤ 3 meses	Residues	600	300-500	9.72				46.87	low		paddy soil		6.08	6.08	7.17	7.02	6.08	6.08	acid	7.17	7.02	neutral	1:2.5 water				1			ND					5.03	33
Zhang et al., 2020	test	POT	81	2.7	≤ 3 meses	Residues	600	300-500	9.72				46.87	low		paddy soil		6.08	6.08	7.77	7.02	6.08	6.08	acid	7.77	7.02	alcaline	1:2.5 water				2			ND					5.03	33
Liu et al., 2020	control	POT	2	0.0666667	≤ 3 meses											Shale-derived	no	5.5	5.5			5.7275	5.7275	acid				1:1 water				0			ND			As, Cd	AMBAS		1.26		1.55						0.67
Liu et al., 2020	test	POT	2	0.0666667	≤ 3 meses	Residues	300	300-500								Shale-derived	no	5.5	5.5			5.7275	5.7275	acid				1:1 water				5			ND			As, Cd	AMBAS		1.26		1.55						0.42
Liu et al., 2020	test	POT	2	0.0666667	≤ 3 meses	Residues	300	300-500								Shale-derived	no	5.5	5.5			5.7275	5.7275	acid				1:1 water				5			ND			As, Cd	AMBAS		1.26		1.55						0.32
Álvarez et al., 2020	control	INCUBATION	180	6	> 3 meses ≤ 1 año										Fine	Cambisol Z1	no	4.68	4.68	5.81	5.81	4.68	4.68	acid	5.81	5.81	acid	1:2.5 water				0	0.06	0.16	organic carbon	1.34		P, As, K, Cd, Pb, Cu, Ni, Zn, Cr, Fe	AMBAS	1307	65.5	120	0.5	104	183	27.5	130	97.3	0.07
Álvarez et al., 2020	test	INCUBATION	180	6	> 3 meses ≤ 1 año	Manure	450	300-500	10.07		470	medium	4.28	low	Fine	Cambisol Z1	no	4.68	4.68	8.44	5.81	4.68	4.68	acid	8.44	5.81	alcaline	1:2.5 water				10		2.23	ND			Cd concentration, Pb, Cu, Fe, Ni, Zn, Cr	FINAL	1307	65.5	120	0.5	104	183	27.5	130	97.3	0.07
Álvarez et al., 2020	test	INCUBATION	180	6	> 3 meses ≤ 1 año	Manure	600	501-700	10.73		500	medium	7.03	low	Fine	Cambisol Z1	no	4.68	4.68	8.46	5.81	4.68	4.68	acid	8.46	5.81	alcaline	1:2.5 water				10		2.24	ND			Cd concentration, Pb, Cu, Fe, Ni, Zn, Cr	FINAL	1307	65.5	120	0.5	104	183	27.5	130	97.3	0.06
Álvarez et al., 2020	test	INCUBATION	180	6	> 3 meses ≤ 1 año	Manure	450	300-500	10.59		400	medium	5.68	low	Fine	Cambisol Z1	no	4.68	4.68	8.07	5.81	4.68	4.68	acid	8.07	5.81	alcaline	1:2.5 water				10		1.61	ND			Cd concentration, Pb, Cu, Fe, Ni, Zn, Cr	FINAL	1307	65.5	120	0.5	104	183	27.5	130	97.3	0.06
Álvarez et al., 2020	test	INCUBATION	180	6	> 3 meses ≤ 1 año	Manure	600	501-700	10.88		470	medium	35.97	low	Fine	Cambisol Z1	no	4.68	4.68	8.21	5.81	4.68	4.68	acid	8.21	5.81	alcaline	1:2.5 water				10		1.65	ND			Cd concentration, Pb, Cu, Fe, Ni, Zn, Cr	FINAL	1307	65.5	120	0.5	104	183	27.5	130	97.3	0.07
Álvarez et al., 2020	control	INCUBATION	180	6	> 3 meses ≤ 1 año										Coarse	Technosol Z2	no	4.34	4.34	5.1	5.1	4.34	4.34	strongly acid	5.1	5.1	acid	1:2.5 water				0	0.09	0.09	organic carbon	0.22		P, As, K, Cd, Pb, Cu, Ni, Zn, Cr, Fe	AMBAS	1949	236	100	0.5	296	374	2.47	219	2.56	0.07
Álvarez et al., 2020	test	INCUBATION	180	6	> 3 meses ≤ 1 año	Manure	450	300-500	10.07		470	medium	4.28	low	Coarse	Technosol Z2	no	4.34	4.34	9.43	5.1	4.34	4.34	strongly acid	9.43	5.1	strongly alcaline	1:2.5 water				10		2.29	ND			Cd concentration, Pb, Cu, Fe, Ni, Zn, Cr	FINAL	1949	236	100	0.5	296	374	2.47	219	2.56	0.06
Álvarez et al., 2020	test	INCUBATION	180	6	> 3 meses ≤ 1 año	Manure	600	501-700	10.73		500	medium	7.03	low	Coarse	Technosol Z2	no	4.34	4.34	9.18	5.1	4.34	4.34	strongly acid	9.18	5.1	strongly alcaline	1:2.5 water				10		2.5	ND			Cd concentration, Pb, Cu, Fe, Ni, Zn, Cr	FINAL	1949	236	100	0.5	296	374	2.47	219	2.56	0.06
Álvarez et al., 2020	test	INCUBATION	180	6	> 3 meses ≤ 1 año	Manure	450	300-500	10.59		400	medium	5.68	low	Coarse	Technosol Z2	no	4.34	4.34	7.73	5.1	4.34	4.34	strongly acid	7.73	5.1	alcaline	1:2.5 water				10		2.05	ND			Cd concentration, Pb, Cu, Fe, Ni, Zn, Cr	FINAL	1949	236	100	0.5	296	374	2.47	219	2.56	0.05
Álvarez et al., 2020	test	INCUBATION	180	6	> 3 meses ≤ 1 año	Manure	600	501-700	10.88		470	medium	35.97	low	Coarse	Technosol Z2	no	4.34	4.34	7.97	5.1	4.34	4.34	strongly acid	7.97	5.1	alcaline	1:2.5 water				10		2.25	ND			Cd concentration, Pb, Cu, Fe, Ni, Zn, Cr	FINAL	1949	236	100	0.5	296	374	2.47	219	2.56	0.05
Álvarez et al., 2020	control	INCUBATION	180	6	> 3 meses ≤ 1 año										Coarse	Technosol Z3	no	3.63	3.63	3.86	3.86	3.63	3.63	strongly acid	3.86	3.86	strongly acid	1:2.5 water				0	0.22	0.24	organic carbon	0.1		P, As, K, Cd, Pb, Cu, Ni, Zn, Cr, Fe	AMBAS	988	528	90	0.5	422	248	2.13	81.4	2.42	0.07
Álvarez et al., 2020	test	INCUBATION	180	6	> 3 meses ≤ 1 año	Manure	450	300-500	10.07		470	medium	4.28	low	Coarse	Technosol Z3	no	3.63	3.63	7.29	3.86	3.63	3.63	strongly acid	7.29	3.86	neutral	1:2.5 water				10		3.49	ND			Cd concentration, Pb, Cu, Fe, Ni, Zn, Cr	FINAL	988	528	90	0.5	422	248	2.13	81.4	2.42	0.05
Álvarez et al., 2020	test	INCUBATION	180	6	> 3 meses ≤ 1 año	Manure	600	501-700	10.73		500	medium	7.03	low	Coarse	Technosol Z3	no	3.63	3.63	7.66	3.86	3.63	3.63	strongly acid	7.66	3.86	alcaline	1:2.5 water				10		3.61	ND			Cd concentration, Pb, Cu, Fe, Ni, Zn, Cr	FINAL	988	528	90	0.5	422	248	2.13	81.4	2.42	0.05
Álvarez et al., 2020	test	INCUBATION	180	6	> 3 meses ≤ 1 año	Manure	450	300-500	10.59		400	medium	5.68	low	Coarse	Technosol Z3	no	3.63	3.63	8.13	3.86	3.63	3.63	strongly acid	8.13	3.86	alcaline	1:2.5 water				10		2.94	ND			Cd concentration, Pb, Cu, Fe, Ni, Zn, Cr	FINAL	988	528	90	0.5	422	248	2.13	81.4	2.42	0.06
Álvarez et al., 2020	test	INCUBATION	180	6	> 3 meses ≤ 1 año	Manure	600	501-700	10.88		470	medium	35.97	low	Coarse	Technosol Z3	no	3.63	3.63	8.08	3.86	3.63	3.63	strongly acid	8.08	3.86	alcaline	1:2.5 water				10		2.75	ND			Cd concentration, Pb, Cu, Fe, Ni, Zn, Cr	FINAL	988	528	90	0.5	422	248	2.13	81.4	2.42	0.06
Álvarez et al., 2020	control	INCUBATION	180	6	> 3 meses ≤ 1 año										Coarse	Technosol M1	no	5.67	5.67	7.91	7.91	5.67	5.67	acid	7.91	5.67	alcaline	1:2.5 water				0	0.49	0.9	organic carbon	1.73		P, As, K, Cd, Pb, Cu, Ni, Zn, Cr, Fe	AMBAS	1915	110	4340	12.7	3295	13.6	43.1	11035	72	4.93
Álvarez et al., 2020	test	INCUBATION	180	6	> 3 meses ≤ 1 año	Manure	450	300-500	10.07		470	medium	4.28	low	Coarse	Technosol M1	no	5.67	5.67	7.96	7.91	5.67	5.67	acid	7.96	5.67	alcaline	1:2.5 water				10		3.11	ND			Cd concentration, Pb, Cu, Fe, Ni, Zn, Cr	FINAL	1915	110	4340	12.7	3295	13.6	43.1	11035	72	1.46
Álvarez et al., 2020	test	INCUBATION	180	6	> 3 meses ≤ 1 año	Manure	600	501-700	10.73		500	medium	7.03	low	Coarse	Technosol M1	no	5.67	5.67	7.59	7.91	5.67	5.67	acid	7.59	5.67	neutral	1:2.5 water				10		3.14	ND			Cd concentration, Pb, Cu, Fe, Ni, Zn, Cr	FINAL	1915	110	4340	12.7	3295	13.6	43.1	11035	72	1.1
Álvarez et al., 2020	test	INCUBATION	180	6	> 3 meses ≤ 1 año	Manure	450	300-500	10.59		400	medium	5.68	low	Coarse	Technosol M1	no	5.67	5.67	7.49	7.91	5.67	5.67	acid	7.49	5.67	neutral	1:2.5 water				10		3.05	ND			Cd concentration, Pb, Cu, Fe, Ni, Zn, Cr	FINAL	1915	110	4340	12.7	3295	13.6	43.1	11035	72	2.94
Álvarez et al., 2020	test	INCUBATION	180	6	> 3 meses ≤ 1 año	Manure	600	501-700	10.88		470	medium	35.97	low	Coarse	Technosol M1	no	5.67	5.67	7.43	7.91	5.67	5.67	acid	7.43	5.67	neutral	1:2.5 water				10		2.43	ND			Cd concentration, Pb, Cu, Fe, Ni, Zn, Cr	FINAL	1915	110	4340	12.7	3295	13.6	43.1	11035	72	2.5
Álvarez et al., 2020	control	INCUBATION	180	6	> 3 meses ≤ 1 año										Coarse	Technosol M3	no	7.3	7.3	7.24	7.24	7.3	7.3	neutral	7.24	7.24	neutral	1:2.5 water				0	0.25	0.53	organic carbon	1.83		P, As, K, Cd, Pb, Cu, Ni, Zn, Cr, Fe	AMBAS	961	44.4	6930	1.81	174	9.12	27.2	180	44.4	0.33
Álvarez et al., 2020	test	INCUBATION	180	6	> 3 meses ≤ 1 año	Manure	450	300-500	10.07		470	medium	4.28	low	Coarse	Technosol M3	no	7.3	7.3	8.57	7.24	7.3	7.3	neutral	8.57	7.24	alcaline	1:2.5 water				10		2.44	ND			Cd concentration, Pb, Cu, Fe, Ni, Zn, Cr	FINAL	961	44.4	6930	1.81	174	9.12	27.2	180	44.4	0.26
Álvarez et al., 2020	test	INCUBATION	180	6	> 3 meses ≤ 1 año	Manure	600	501-700	10.73		500	medium	7.03	low	Coarse	Technosol M3	no	7.3	7.3	8.05	7.24	7.3	7.3	neutral	8.05	7.24	alcaline	1:2.5 water				10		2.7	ND			Cd concentration, Pb, Cu, Fe, Ni, Zn, Cr	FINAL	961	44.4	6930	1.81	174	9.12	27.2	180	44.4	0.13
Álvarez et al., 2020	test	INCUBATION	180	6	> 3 meses ≤ 1 año	Manure	450	300-500	10.59		400	medium	5.68	low	Coarse	Technosol M3	no	7.3	7.3	7.71	7.24	7.3	7.3	neutral	7.71	7.24	alcaline	1:2.5 water				10		1.58	ND			Cd concentration, Pb, Cu, Fe, Ni, Zn, Cr	FINAL	961	44.4	6930	1.81	174	9.12	27.2	180	44.4	0.21
Álvarez et al., 2020	test	INCUBATION	180	6	> 3 meses ≤ 1 año	Manure	600	501-700	10.88		470	medium	35.97	low	Coarse	Technosol M3	no	7.3	7.3	8.67	7.24	7.3	7.3	neutral	8.67	7.24	alcaline	1:2.5 water				10		1.73	ND			Cd concentration, Pb, Cu, Fe, Ni, Zn, Cr	FINAL	961	44.4	6930	1.81	174	9.12	27.2	180	44.4	0.27
Álvarez et al., 2020	control	INCUBATION	180	6	> 3 meses ≤ 1 año										Fine	Cambisol M2	no	5.84	5.84	8.23	8.23	5.84	5.84	acid	8.23	8.23	alcaline	1:2.5 water				0	0.23	0.4	organic carbon	5.38		P, As, K, Cd, Pb, Cu, Ni, Zn, Cr, Fe	AMBAS	706	19.3	7210	0.99	82.2	11.2	8.8	758	43.8	0.4
Álvarez et al., 2020	test	INCUBATION	180	6	> 3 meses ≤ 1 año	Manure	450	300-500	10.07		470	medium	4.28	low	Fine	Cambisol M2	no	5.84	5.84	9.3	8.23	5.84	5.84	acid	9.3	8.23	strongly alcaline	1:2.5 water				10		1.8	ND			Cd concentration, Pb, Cu, Fe, Ni, Zn, Cr	FINAL	706	19.3	7210	0.99	82.2	11.2	8.8	758	43.8	0.37
Álvarez et al., 2020	test	INCUBATION	180	6	> 3 meses ≤ 1 año	Manure	600	501-700	10.73		500	medium	7.03	low	Fine	Cambisol M2	no	5.84	5.84	8.88	8.23	5.84	5.84	acid	8.88	8.23	alcaline	1:2.5 water				10		1.72	ND			Cd concentration, Pb, Cu, Fe, Ni, Zn, Cr	FINAL	706	19.3	7210	0.99	82.2	11.2	8.8	758	43.8	0.28
Álvarez et al., 2020	test	INCUBATION	180	6	> 3 meses ≤ 1 año	Manure	450	300-500	10.59		400	medium	5.68	low	Fine	Cambisol M2	no	5.84	5.84	9.04	8.23	5.84	5.84	acid	9.04	8.23	strongly alcaline	1:2.5 water				10		2.13	ND			Cd concentration, Pb, Cu, Fe, Ni, Zn, Cr	FINAL	706	19.3	7210	0.99	82.2	11.2	8.8	758	43.8	0.23
Álvarez et al., 2020	test	INCUBATION	180	6	> 3 meses ≤ 1 año	Manure	600	501-700	10.88		470	medium	35.97	low	Fine	Cambisol M2	no	5.84	5.84	9.18	8.23	5.84	5.84	acid	9.18	8.23	strongly alcaline	1:2.5 water				10		1.73	ND			Cd concentration, Pb, Cu, Fe, Ni, Zn, Cr	FINAL	706	19.3	7210	0.99	82.2	11.2	8.8	758	43.8	0.34
Álvarez et al., 2020	control	INCUBATION	180	6	> 3 meses ≤ 1 año										Fine	Cambisol P1	no	8.16	8.16	8.42	8.42	8.16	8.16	alcaline	8.42	8.42	alcaline	1:2.5 water				0	0.19	0.37	organic carbon	0.78		P, As, K, Cd, Pb, Cu, Ni, Zn, Cr, Fe	AMBAS	10001	144	5050	5.84	5072	34.3	44.8	2575	61.5	0.83
Álvarez et al., 2020	test	INCUBATION	180	6	> 3 meses ≤ 1 año	Manure	450	300-500	10.07		470	medium	4.28	low	Fine	Cambisol P1	no	8.16	8.16	8.63	8.42	8.16	8.16	alcaline	8.63	8.42	alcaline	1:2.5 water				10		2.21	ND			Cd concentration, Pb, Cu, Fe, Ni, Zn, Cr	FINAL	10001	144	5050	5.84	5072	34.3	44.8	2575	61.5	0.009
Álvarez et al., 2020	test	INCUBATION	180	6	> 3 meses ≤ 1 año	Manure	600	501-700	10.73		500	medium	7.03	low	Fine	Cambisol P1	no	8.16	8.16	8.82	8.42	8.16	8.16	alcaline	8.82	8.42	alcaline	1:2.5 water				10		2.35	ND			Cd concentration, Pb, Cu, Fe, Ni, Zn, Cr	FINAL	10001	144	5050	5.84	5072	34.3	44.8	2575	61.5	0.009
Álvarez et al., 2020	test	INCUBATION	180	6	> 3 meses ≤ 1 año	Manure	450	300-500	10.59		400	medium	5.68	low	Fine	Cambisol P1	no	8.16	8.16	8.63	8.42	8.16	8.16	alcaline	8.63	8.42	alcaline	1:2.5 water				10		2	ND			Cd concentration, Pb, Cu, Fe, Ni, Zn, Cr	FINAL	10001	144	5050	5.84	5072	34.3	44.8	2575	61.5	0.009
Álvarez et al., 2020	test	INCUBATION	180	6	> 3 meses ≤ 1 año	Manure	600	501-700	10.88		470	medium	35.97	low	Fine	Cambisol P1	no	8.16	8.16	8.72	8.72	8.16	8.16	alcaline	8.72	8.72	alcaline	1:2.5 water				10		1.46	ND			Cd concentration, Pb, Cu, Fe, Ni, Zn, Cr	FINAL	10001	144	5050	5.84	5072	34.3	44.8	2575	61.5	0.009
Álvarez et al., 2020	control	INCUBATION	180	6	> 3 meses ≤ 1 año										Fine	Cambisol P2	no	8.09	8.16	5.06	8.72	8.09	8.16	alcaline	5.06	8.72	acid	1:2.5 water				0	0.35	1.21	organic carbon	0.92		P, As, K, Cd, Pb, Cu, Ni, Zn, Cr, Fe	AMBAS	6632	118.3	4970	20.1	2848	207	39.9	8573	39.2	2.84
Álvarez et al., 2020	test	INCUBATION	180	6	> 3 meses ≤ 1 año	Manure	450	300-500	10.07		470	medium	4.28	low	Fine	Cambisol P2	no	8.09	8.16	7.5	8.72	8.09	8.16	alcaline	7.5	8.72	neutral	1:2.5 water				10		3.43	ND			Cd concentration, Pb, Cu, Fe, Ni, Zn, Cr	FINAL	6632	118.3	4970	20.1	2848	207	39.9	8573	39.2	0.009
Álvarez et al., 2020	test	INCUBATION	180	6	> 3 meses ≤ 1 año	Manure	600	501-700	10.73		500	medium	7.03	low	Fine	Cambisol P2	no	8.09	8.16	7.86	8.72	8.09	8.16	alcaline	7.86	8.72	alcaline	1:2.5 water				10		2.93	ND			Cd concentration, Pb, Cu, Fe, Ni, Zn, Cr	FINAL	6632	118.3	4970	20.1	2848	207	39.9	8573	39.2	0.75
Álvarez et al., 2020	test	INCUBATION	180	6	> 3 meses ≤ 1 año	Manure	450	300-500	10.59		400	medium	5.68	low	Fine	Cambisol P2	no	8.09	8.16	7.76	8.72	8.09	8.16	alcaline	7.76	8.72	alcaline	1:2.5 water				10		2.42	ND			Cd concentration, Pb, Cu, Fe, Ni, Zn, Cr	FINAL	6632	118.3	4970	20.1	2848	207	39.9	8573	39.2	0.79
Álvarez et al., 2020	test	INCUBATION	180	6	> 3 meses ≤ 1 año	Manure	600	501-700	10.88		470	medium	35.97	low	Fine	Cambisol P2	no	8.09	8.16	7.6	8.72	8.09	8.16	alcaline	7.6	8.72	alcaline	1:2.5 water				10		2.57	ND			Cd concentration, Pb, Cu, Fe, Ni, Zn, Cr	FINAL	6632	118.3	4970	20.1	2848	207	39.9	8573	39.2	1.5
Álvarez et al., 2020	control	INCUBATION	180	6	> 3 meses ≤ 1 año										Coarse	Technosol P3	no	7.9	7.9	7.69	7.69	7.9	7.9	alcaline	7.69	7.69	alcaline	1:2.5 water				0	1.49	2.28	organic carbon	0.39		P, As, K, Cd, Pb, Cu, Ni, Zn, Cr, Fe	AMBAS	424	234	6130	8.62	2321	35.1	29.5	3580	50.9	0.79
Álvarez et al., 2020	test	INCUBATION	180	6	> 3 meses ≤ 1 año	Manure	450	300-500	10.07		470	medium	4.28	low	Coarse	Technosol P3	no	7.9	7.9	8.65	7.69	7.9	7.9	alcaline	8.65	7.69	alcaline	1:2.5 water				10		3.95	ND			Cd concentration, Pb, Cu, Fe, Ni, Zn, Cr	FINAL	424	234	6130	8.62	2321	35.1	29.5	3580	50.9	1.53
Álvarez et al., 2020	test	INCUBATION	180	6	> 3 meses ≤ 1 año	Manure	600	501-700	10.73		500	medium	7.03	low	Coarse	Technosol P3	no	7.9	7.9	8.19	7.69	7.9	7.9	alcaline	8.19	7.69	alcaline	1:2.5 water				10		5.21	ND			Cd concentration, Pb, Cu, Fe, Ni, Zn, Cr	FINAL	424	234	6130	8.62	2321	35.1	29.5	3580	50.9	1.54
Álvarez et al., 2020	test	INCUBATION	180	6	> 3 meses ≤ 1 año	Manure	450	300-500	10.59		400	medium	5.68	low	Coarse	Technosol P3	no	7.9	7.9	7.91	7.69	7.9	7.9	alcaline	7.91	7.69	alcaline	1:2.5 water				10		3.7	ND			Cd concentration, Pb, Cu, Fe, Ni, Zn, Cr	FINAL	424	234	6130	8.62	2321	35.1	29.5	3580	50.9	2.27
Álvarez et al., 2020	test	INCUBATION	180	6	> 3 meses ≤ 1 año	Manure	600	501-700	10.88		470	medium	35.97	low	Coarse	Technosol P3	no	7.9	7.9	8.03	7.69	7.9	7.9	alcaline	8.03	7.69	alcaline	1:2.5 water				10		3.92	ND			Cd concentration, Pb, Cu, Fe, Ni, Zn, Cr	FINAL	424	234	6130	8.62	2321	35.1	29.5	3580	50.9	1.3
Álvarez et al., 2020	control	INCUBATION	180	6	> 3 meses ≤ 1 año										Coarse	Technosol P4	no	7.89	7.89	7.57	7.57	7.89	7.89	alcaline	7.57	7.57	neutral	1:2.5 water				0	2.24	3.1	organic carbon	0.25		P, As, K, Cd, Pb, Cu, Ni, Zn, Cr, Fe	AMBAS	722	530	8330	16.4	2770	47	31.4	6373	43.2	0.47
Álvarez et al., 2020	test	INCUBATION	180	6	> 3 meses ≤ 1 año	Manure	450	300-500	10.07		470	medium	4.28	low	Coarse	Technosol P4	no	7.89	7.89	8.02	7.57	7.89	7.89	alcaline	8.02	7.57	alcaline	1:2.5 water				10		5.41	ND			Cd concentration, Pb, Cu, Fe, Ni, Zn, Cr	FINAL	722	530	8330	16.4	2770	47	31.4	6373	43.2	1.18
Álvarez et al., 2020	test	INCUBATION	180	6	> 3 meses ≤ 1 año	Manure	600	501-700	10.73		500	medium	7.03	low	Coarse	Technosol P4	no	7.89	7.89	8.22	7.57	7.89	7.89	alcaline	8.22	7.57	alcaline	1:2.5 water				10		5.36	ND			Cd concentration, Pb, Cu, Fe, Ni, Zn, Cr	FINAL	722	530	8330	16.4	2770	47	31.4	6373	43.2	0.42
Álvarez et al., 2020	test	INCUBATION	180	6	> 3 meses ≤ 1 año	Manure	450	300-500	10.59		400	medium	5.68	low	Coarse	Technosol P4	no	7.89	7.89	8.59	7.57	7.89	7.89	alcaline	8.59	7.57	alcaline	1:2.5 water				10		4.48	ND			Cd concentration, Pb, Cu, Fe, Ni, Zn, Cr	FINAL	722	530	8330	16.4	2770	47	31.4	6373	43.2	1.45
Álvarez et al., 2020	test	INCUBATION	180	6	> 3 meses ≤ 1 año	Manure	600	501-700	10.88		470	medium	35.97	low	Coarse	Technosol P4	no	7.89	7.89	8.1	7.57	7.89	7.89	alcaline	8.1	7.57	alcaline	1:2.5 water				10		4.1	ND			Cd concentration, Pb, Cu, Fe, Ni, Zn, Cr	FINAL	722	530	8330	16.4	2770	47	31.4	6373	43.2	0.81
Tu et al., 2020	control	POT	75	2.5	≤ 3 meses										Coarse	Topsoil from farmland spiked	no	7.85	7.85	7.6	7.6	8.00935	8.00935	alcaline	7.7666	7.7666	alcaline	1:1 water				0			organic matter	0.46632		P, K, Cd, Cu	AMBAS	1090		15360	29.5		127.3				29.5
Tu et al., 2020	test	POT	75	2.5	≤ 3 meses	Straw	400	300-500	9.6						Coarse	Topsoil from farmland spiked	No	7.85	7.85	7.6	7.6	8.00935	8.00935	alcaline	7.7666	7.7666	alcaline	1:1 water				1			ND			P, K, Cd, Cu	AMBAS	1090		15360	29.5		127.3				24.7
Tu et al., 2020	test	POT	75	2.5	≤ 3 meses	Straw	400	300-500	9.6						Coarse	Topsoil from farmland spiked	No	7.85	7.85	7.6	7.6	8.00935	8.00935	alcaline	7.7666	7.7666	alcaline	1:1 water				5			ND			P, K, Cd, Cu	AMBAS	1090		15360	29.5		127.3				20.8
Tu et al., 2020	test	POT	75	2.5	≤ 3 meses	Straw	400	300-500	9.6						Coarse	Topsoil from farmland spiked	No	7.85	7.85	7.4	7.6	8.00935	8.00935	alcaline	7.5724	7.7666	neutral	1:1 water				1			ND			P, K, Cd, Cu	AMBAS	1090		15360	29.5		127.3				23.3
Tu et al., 2020	test	POT	75	2.5	≤ 3 meses	Straw	400	300-500	9.6						Coarse	Topsoil from farmland spiked	No	7.85	7.85	7.2	7.6	8.00935	8.00935	alcaline	7.3782	7.7666	neutral	1:1 water				5			ND			P, K, Cd, Cu	AMBAS	1090		15360	29.5		127.3				16.8
Qin et al., 2020	control	POT	21	0.7	≤ 3 meses										Coarse	Red loam layer	No	5.4	5.4	5.41	5.41	5.4	5.4	acid	5.41	5.41	acid	1:2.5 water	1.323	1.496		0	200		organic carbon	2.01		P, K, Cd	INICIAL	9.3		182.7	1.8
Qin et al., 2020	test	POT	21	0.7	≤ 3 meses	Straw			8.5				62.1	medium	Coarse	Red loam layer	no	5.4	5.4	5.62	5.41	5.4	5.4	acid	5.62	5.41	acid	1:2.5 water	1.323	1.496		2			ND					9.3		182.7	1.8
Qin et al., 2020	test	POT	21	0.7	≤ 3 meses	Straw			8.5				62.1	medium	Coarse	Red loam layer	no	5.4	5.4	6.3	5.41	5.4	5.4	acid	6.3	5.41	acid	1:2.5 water	1.323	1.496		5			ND					9.3		182.7	1.8
Qin et al., 2020	control	POT	180	6	> 3 meses ≤ 1 año										Coarse	Red loam layer	no	5.4	5.4	5.3	5.3	5.4	5.4	acid	5.3	5.3	acid	1:2.5 water	1.323	1.496		0	200		organic carbon	2.01		P, K, Cd	INICIAL	9.3		182.7	1.8
Qin et al., 2020	test	POT	180	6	> 3 meses ≤ 1 año	Straw			8.5				62.1	medium	Coarse	Red loam layer	no	5.4	5.4	5.13	5.3	5.4	5.4	acid	5.13	5.3	acid	1:2.5 water	1.323	1.496		2			ND					9.3		182.7	1.8
Qin et al., 2020	test	POT	180	6	> 3 meses ≤ 1 año	Straw			8.5				62.1	medium	Coarse	Red loam layer	no	5.4	5.4	5.31	5.3	5.4	5.4	acid	5.31	5.3	acid	1:2.5 water	1.323	1.496		5			ND					9.3		182.7	1.8
Liu et al., 2020	control	POT	90	3	≤ 3 meses										Medium	Cinnamon soil	yes	8.5	8.5			8.44444	8.44444	alcaline				1:5 water				0			organic matter	0.00157644		P, Cd/Cd concentration	AMBAS	9.76			9.64						6.6
Liu et al., 2020	test	POT	90	3	≤ 3 meses	Straw	450	300-500	8.23				1331	high	Medium	Cinnamon soil	yes	8.5	8.5			8.44444	8.44444	alcaline				1:5 water				0.2			ND			Cd/Cd concentration	AMBAS				9.64						7
Liu et al., 2020	test	POT	90	3	≤ 3 meses	Straw	450	300-500	8.23				1331	high	Medium	Cinnamon soil	yes	8.5	8.5			8.44444	8.44444	alcaline				1:5 water				0.5			ND			Cd/Cd concentration	AMBAS				9.64						8
Liu et al., 2020	test	POT	90	3	≤ 3 meses	Straw	450	300-500	8.23				1331	high	Medium	Cinnamon soil	yes	8.5	8.5			8.44444	8.44444	alcaline				1:5 water				1			ND			Cd/Cd concentration	AMBAS				9.64						8.6
Meier et al., 2019c	control	POT	90	3	≤ 3 meses										Coarse	Sandy Soil	no	5.29	5.29	5.8	5.8	5.52359	5.52359	acid	6.0188	6.0188	acid	ND				0			organic matter	1.74		Cu	AMBAS						338
Meier et al., 2019c	test	POT	90	3	≤ 3 meses	Manure	500	300-500	9.1	9.1	924	Medium	11.51	low	Coarse	Sandy Soil	no	5.29	5.29	6.7	5.8	5.52359	5.52359	acid	6.8927	6.0188	neutral	ND				3			ND			Cu	AMBAS						338
Meier et al., 2019c	test	POT	90	3	≤ 3 meses	Residues	300	300-500	7.81	7.81	789	Medium	0.16	low	Coarse	Sandy Soil	no	5.29	5.29	6.1	5.8	5.52359	5.52359	acid	6.3101	6.0188	acid	ND				3			ND			Cu	AMBAS						338
Meier et al., 2019c	test	POT	90	3	≤ 3 meses	Wood	600	501-700	9.2	9.2	724	Medium	1.3	low	Coarse	Sandy Soil	no	5.29	5.29	6.2	5.8	5.52359	5.52359	acid	6.4072	6.0188	acid	ND				3			ND			Cu	AMBAS						338
Frick et al., 2018	control		56	1.86667	≤ 3 meses										Medium	loamy sand	No	6.4	6.4			6.4	6.4	acid				1:2.5 water	1.712	76.974		0			organis carbon	2.3		As, Pb,Cu,Zn, Cr, Fe, K	AMBAS		1364			29	1662		120	540
Frick et al., 2018	test		56	1.86667	≤ 3 meses	Grass	850	>700	10.1						Medium	loamy sand	No	6.4	6.4			6.4	6.4	acid				1:2.5 water	1.712	76.974		1			ND			Fe, Zn, Cr, K	FINAL		1364			29	1662		120	540
Frick et al., 2018	test		56	1.86667	≤ 3 meses	Grass	850	>700	10.1						Medium	loamy sand	no	6.4	6.4			6.4	6.4	acid				1:2.5 water	1.712	76.974		1			ND			Fe, Zn, Cr, K	FINAL		1364			29	1662		120	540
Frick et al., 2018	test		56	1.86667	≤ 3 meses	Grass	850	>700	10.1						Medium	loamy sand	no	6.4	6.4			6.4	6.4	acid				1:2.5 water	1.712	76.974		1			ND			Fe, Zn, Cr, K	FINAL		1364			29	1662		120	540
Frick et al., 2018	test		56	1.86667	≤ 3 meses	Grass	850	>700	10.1						Medium	loamy sand	no	6.4	6.4			6.4	6.4	acid				1:2.5 water	1.712	76.974		1			ND			Fe, Zn, Cr, K	FINAL		1364			29	1662		120	540
Li et al., 2018	control	POT	30	1	≤ 3 meses										Fine	paddy soil	no	7.62	7.62	7.68	7.68	7.55556	7.55556	neutral	7.61616	7.61616	alcaline	1:5 water				0	282	248.5	total carbon	1.7745		P, K, Cd	INICIAL	909		16393	0.08
Li et al., 2018	test	POT	30	1	≤ 3 meses	Grass	700	501-700	7.13	7.13	10.48	low	268.35	high	Fine	Paddy soil	no	7.62	7.62	7.35	7.68	7.55556	7.55556	neutral	7.28283	7.61616	neutral	1:5 water				1		317.23	ND					909		16393	0.08
Gao & DeLuca, 2018	control	FIELD		0											Coarse	sandy loam soils	yes	6.42	6.42	6.45	6.45	6.62082	6.62082	neutral	6.64995	6.64995	neutral	1:1 water	1.07		0				total carbon		2.21306	Ca2+, Fe	FINAL
Gao & DeLuca, 2018	test	FIELD		0		Wood	500	300-500	6.92						Coarse	sandy loam soils	yes	6.42	6.42	6.92	6.45	6.62082	6.62082	neutral	7.10632	6.64995	neutral	1:1 water	1.07		20				total carbon		2.99721	Ca2+, Fe	FINAL
Gao & DeLuca, 2018	test	FIELD		0		Wood	500	300-500	6.92						Coarse	sandy loam soils	yes	6.42	6.42	6.83	6.45	6.62082	6.62082	neutral	7.01893	6.64995	neutral	1:1 water	1.07		20				total carbon		3.15185	Ca2+, Fe	FINAL
Strachel et al., 2018	control	POT	60	2	≤ 3 meses										Fine	brown calcic soil	yes	6.3	6.3	6.65	6.65	7.10529	7.10529	neutral	7.41481	7.41481	neutral	1:1 KCl	1.866	91.101		0			ND	1		Zn	AMBAS								0
Strachel et al., 2018	test	POT	60	2	≤ 3 meses	Residues			9						Fine	brown calcic soil	yes	5.77	6.3	6.3	6.65	6.6366	7.10529	neutral	7.10529	7.41481	neutral	1:1 KCl	1.866	91.101		2.5			ND			Zn	AMBAS								0
Wawra et al., 2018	control	POT	365	12.1667	> 1 año ≤ 2 años										Medium	Loamy soil	no	6.5	6.5	6.6	6.6	7.18182	7.18182	neutral	7.28063	7.28063	neutral	1:5 0.01 M CaCl2	1.452	11.038		0		38.2	organic carbon	2.4		As, Cd, Pb, Cu, Zn	AMBAS		0.0065		0.0025	0.1718	0.0413		1.0466		0.0026
Wawra et al., 2018	test	POT	365	12.1667	> 1 año ≤ 2 años	Grass	500	300-500	8.77						Medium	Loamy soil	no	6.5	6.5	7.1	6.6	7.18182	7.18182	neutral	7.7747	7.28063	alcaline	1:5 0.01 M CaCl2	1.452	11.038		3		52	organic carbon	3.4		As, Cd, Pb, Cu, Zn	AMBAS		0.0081		0.0017	0.0751	0.0615		0.9515		0.0016
Wawra et al., 2018	control	POT	365	12.1667	> 1 año ≤ 2 años										Medium	Loamy soil	yes	6.5	6.5	6.6	6.6	7.18182	7.18182	neutral	7.28063	7.28063	neutral	1:5 0.01 M CaCl2	1.452	11.038		0		37.8	organic carbon	2.3		As, Cd, Pb, Cu, Zn	AMBAS		0.0063		0.0023	0.117	0.0385		0.8964
Wawra et al., 2018	test	POT	365	12.1667	> 1 año ≤ 2 años	Grass	500	300-500	8.77						Medium	Loamy soil	yes	6.5	6.5	7	6.6	7.18182	7.18182	neutral	7.67589	7.28063	alcaline	1:5 0.01 M CaCl2	1.452	11.038		3		53.7	organic carbon	3.3		As, Cd, Pb, Cu, Zn	AMBAS		0.009		0.0016	0.0632	0.0707		0.8221
Yang et al., 2018	control	POT	180	6	> 3 meses ≤ 1 año										Fine	rhizosphere soil and bulk soil	yes	6.68	6.68	6.62	6.62	6.87328	6.87328	neutral	6.81502	6.81502	neutral	ND				0			organic matter	2.3954		P, As,K, Fe	INICIAL	730	84.7	14190
Yang et al., 2018	test	POT	180	6	> 3 meses ≤ 1 año	Straw			9.98						Fine	rhizosphere soil and bulk soil	yes	6.68	6.68	6.52	6.62	6.87328	6.87328	neutral	6.71792	6.81502	neutral	ND				1			ND			Fe	FINAL	730	0.74	14190
Yang et al., 2018	test	POT	180	6	> 3 meses ≤ 1 año	Straw			9.98						Fine	rhizosphere soil and bulk soil	yes	6.68	6.68	6.56	6.62	6.87328	6.87328	neutral	6.75676	6.81502	neutral	ND				2			ND			Fe	FINAL	730		14190
Yang et al., 2018	test	POT	180	6	> 3 meses ≤ 1 año	Straw			9.98						Fine	rhizosphere soil and bulk soil	yes	6.68	6.68	6.44	6.62	6.87328	6.87328	neutral	6.64024	6.81502	neutral	ND				4			ND			Fe	FINAL	730		14190
Xu et al., 2017	control	POT	49	1.63333	≤ 3 meses										Medium	silty loam	no	6.26	6.26			6.18182	6.18182	acid				1:5 water	1.332	6.74		0	27.53		total carbon	1.93505		P, Mg, Ca, K, Cu, Zn	INICIAL	130		590			8.9		8.19
Xu et al., 2017	test	POT	49	1.63333	≤ 3 meses	Residues	465	300-500	10.29	10.29	0.17	low	202.49	high	Medium	silty loam	no	6.26	6.26			6.18182	6.18182	acid				1:5 water	1.332	6.74		5			ND			Cd concentration	FINAL	130		590			8.9		8.19		41.65
Xu et al., 2017	test	POT	49	1.63333	≤ 3 meses	Residues	465	300-500	10.29	10.29	0.17	low	202.49	high	Medium	silty loam	no	6.26	6.26			6.18182	6.18182	acid				1:5 water	1.332	6.74		5			ND			Pb	FINAL	130		590			8.9		8.19
Xu et al., 2017	test	POT	49	1.63333	≤ 3 meses	Residues	465	300-500	10.29	10.29	0.17	low	202.49	high	Medium	silty loam	no	6.26	6.26			6.18182	6.18182	acid				1:5 water	1.332	6.74		5			ND			Cd concentration, Pb	FINAL	130		590			8.9		8.19		41.65
Xu et al., 2017	test	POT	49	1.63333	≤ 3 meses	Residues	465	300-500	10.29	10.29	0.17	low	202.49	high	Medium	silty loam	no	6.26	6.26			6.18182	6.18182	acid				1:5 water	1.332	6.74		5			ND					130		590			8.9		8.19
Mierzwa-Hersztek et al., 2017	control	POT	200	6.66667	> 3 meses ≤ 1 año										Medium	Loamy Sand 87%, silt 8%, clay 5%	no	4.6	4.6	4.65	4.65	5.3784	5.3784	acid	5.42377	5.42377	acid	1:2.5 KCl	1.701	73.365		0		27.3	total carbon	0.3549	0.382785	Cd, Pb, Cu, Ni, Zn, Cr	AMBAS				0.22	21.2	3.3	1.15	23.9	3.01	0.02
Mierzwa-Hersztek et al., 2017	test	POT	200	6.66667	> 3 meses ≤ 1 año	Sludge	300	300-500	6.89	6.89	44.8	low	24.9	low	Medium	Loamy Sand 87%, silt 8%, clay 5%	no	4.6	4.6	4.77	4.65	5.3784	5.3784	acid	5.53267	5.42377	acid	1:2.5 KCl	1.701	73.365		0.5		102	total carbon		0.40222	Cd concentration, Pb, Cu, Zn	FINAL				0.22	21.2	3.3	1.15	23.9	3.01	0.0125
Mierzwa-Hersztek et al., 2017	test	POT	200	6.66667	> 3 meses ≤ 1 año	Sludge	300	300-500	6.89	6.89	44.8	low	24.9	low	Medium	Loamy Sand 87%, silt 8%, clay 5%	no	4.6	4.6	4.92	4.65	5.3784	5.3784	acid	5.66878	5.42377	acid	1:2.5 KCl	1.701	73.365		1		273	total carbon		0.45968	Cd concentration, Pb, Cu, Zn	FINAL				0.22	21.2	3.3	1.15	23.9	3.01	0.01
Mierzwa-Hersztek et al., 2017	test	POT	200	6.66667	> 3 meses ≤ 1 año	Sludge	300	300-500	6.89	6.89	44.8	low	24.9	low	Medium	Loamy Sand 87%, silt 8%, clay 5%	no	4.6	4.6	5.16	4.65	5.3784	5.3784	acid	5.88657	5.42377	acid	1:2.5 KCl	1.701	73.365		2		386	total carbon		0.506155	Cd concentration, Pb, Cu, Zn	FINAL				0.22	21.2	3.3	1.15	23.9	3.01	0.01
Mierzwa-Hersztek et al., 2017	test	POT	200	6.66667	> 3 meses ≤ 1 año	Sludge	300	300-500	7.06	7.06	6.7	low	11.9	low	Medium	Loamy Sand 87%, silt 8%, clay 5%	no	4.6	4.6	4.96	4.65	5.3784	5.3784	acid	5.70508	5.42377	acid	1:2.5 KCl	1.701	73.365		0.5		52.3	total carbon		0.40222	Cd concentration, Pb, Cu, Zn	FINAL				0.22	21.2	3.3	1.15	23.9	3.01	0.01
Mierzwa-Hersztek et al., 2017	test	POT	200	6.66667	> 3 meses ≤ 1 año	Sludge	300	300-500	7.06	7.06	6.7	low	11.9	low	Medium	Loamy Sand 87%, silt 8%, clay 5%	no	4.6	4.6	5.26	4.65	5.3784	5.3784	acid	5.97731	5.42377	acid	1:2.5 KCl	1.701	73.365		1		52.1	total carbon		0.43771	Cd concentration, Pb, Cu, Zn	FINAL				0.22	21.2	3.3	1.15	23.9	3.01	0.0035
Mierzwa-Hersztek et al., 2017	test	POT	200	6.66667	> 3 meses ≤ 1 año	Sludge	300	300-500	7.06	7.06	6.7	low	11.9	low	Medium	Loamy Sand 87%, silt 8%, clay 5%	no	4.6	4.6	5.71	4.65	5.3784	5.3784	acid	6.38566	5.42377	acid	1:2.5 KCl	1.701	73.365		2		64.2	total carbon		0.46982	Cd concentration, Pb, Cu, Zn	FINAL				0.22	21.2	3.3	1.15	23.9	3.01	0.0045
Mierzwa-Hersztek et al., 2017	test	POT	200	6.66667	> 3 meses ≤ 1 año	Sludge	300	300-500	7.18	7.18	5	low	2.2	low	Medium	Loamy Sand 87%, silt 8%, clay 5%	no	4.6	4.6	5.05	4.65	5.3784	5.3784	acid	5.78675	5.42377	acid	1:2.5 KCl	1.701	73.365		0.5		42.6	total carbon		0.389545	Cd concentration, Pb, Cu, Zn	FINAL				0.22	21.2	3.3	1.15	23.9	3.01	0.0085
Mierzwa-Hersztek et al., 2017	test	POT	200	6.66667	> 3 meses ≤ 1 año	Sludge	300	300-500	7.18	7.18	5	low	2.2	low	Medium	Loamy Sand 87%, silt 8%, clay 5%	no	4.6	4.6	5.45	4.65	5.3784	5.3784	acid	6.14973	5.42377	acid	1:2.5 KCl	1.701	73.365		1		49.3	total carbon		0.45461	Cd concentration, Pb, Cu, Zn	FINAL				0.22	21.2	3.3	1.15	23.9	3.01	0.0035
Mierzwa-Hersztek et al., 2017	test	POT	200	6.66667	> 3 meses ≤ 1 año	Sludge	300	300-500	7.18	7.18	5	low	2.2	low	Medium	Loamy Sand 87%, silt 8%, clay 5%	no	4.6	4.6	6.09	4.65	5.3784	5.3784	acid	6.73049	5.42377	neutral	1:2.5 KCl	1.701	73.365		2		64.2	total carbon		0.55601	Cd concentration, Pb, Cu, Zn	FINAL				0.22	21.2	3.3	1.15	23.9	3.01	0.0092
Wawra et al., 2017	control	POT	100	3.33333	> 3 meses ≤ 1 año										Medium	Loamy Sand	no	7.5	7.5			8.20388	8.20388	alcaline				1:1 CaCl2				0			δ13C of Corg ‰			As, Cd, Pb, Zn, Cu	AMBAS		30		6	604			687		0.0268
Wawra et al., 2017	test	POT	100	3.33333	> 3 meses ≤ 1 año	Grass	500	300-500	8.77						Medium	Loamy sand	no	7.5	7.5			8.20388	8.20388	alcaline				1:1 CaCl2				3			ND			Cd Concentration, Pb, Cu, As, Zn	FINAL		30		6	604			687		0.0252
Wawra et al., 2017	test	POT	100	3.33333	> 3 meses ≤ 1 año	Grass	500	300-500	8.77						Medium	Loamy sand	no	7.5	7.5			8.20388	8.20388	alcaline				1:1 CaCl2				1.5			ND			Cd Concentration, Pb, Cu, As, Zn	FINAL		30		6	604			687		0.0247
Moore et al., 2017	control	POT	194	6.46667	> 3 meses ≤ 1 año										Coarse	Sandy Loam	no	5.29	5.29	5.35	5.35	5.29	5.29	acid	5.35	5.35	acid	1:2.5 water	1.518	17.497		0			organic matter	1.74		P, K, Cu, Zn	INICIAL	11		21			338		17
Moore et al., 2017	test	POT	194	6.46667	> 3 meses ≤ 1 año	Residues	300	300-500	7.8	7.8	789	Medium	0.16	low	Coarse	Sandy Loam	no	5.29	5.29	6.57	5.35	5.29	5.29	acid	6.57	5.35	acid	1:2.5 water	1.518	17.497		1			ND					11		21			338		17
Moore et al., 2017	test	POT	194	6.46667	> 3 meses ≤ 1 año	Residues	300	300-500	7.8	7.8	789	Medium	0.16	low	Coarse	Sandy Loam	no	5.29	5.29	7.04	5.35	5.29	5.29	acid	7.04	5.35	neutral	1:2.5 water	1.518	17.497		5			ND					11		21			338		17
Moore et al., 2017	test	POT	194	6.46667	> 3 meses ≤ 1 año	Manure	500	300-500	9.1	9.1	924	Medium	11.51	low	Coarse	Sandy Loam	no	5.29	5.29	6.29	5.35	5.29	5.29	acid	6.29	5.35	acid	1:2.5 water	1.518	17.497		1			ND					11		21			338		17
Moore et al., 2017	test	POT	194	6.46667	> 3 meses ≤ 1 año	Manure	500	300-500	9.1	9.1	924	Medium	11.51	low	Coarse	Sandy Loam	no	5.29	5.29	6.45	5.35	5.29	5.29	acid	6.45	5.35	acid	1:2.5 water	1.518	17.497		5			ND					11		21			338		17
Moore et al., 2017	control	POT	194	6.46667	> 3 meses ≤ 1 año										Coarse	Sandy Loam	no	5.29	5.29	5.21	5.21	5.29	5.29	acid	5.21	5.21	acid	1:2.5 water	1.518	17.497		0			organic matter	1.74
Moore et al., 2017	test	POT	194	6.46667	> 3 meses ≤ 1 año	Residues	300	300-500	7.8	7.8	789	Medium	0.16	low	Coarse	Sandy Loam	no	5.29	5.29	6.1	5.21	5.29	5.29	acid	6.1	5.21	acid	1:2.5 water	1.518	17.497		1			ND
Moore et al., 2017	test	POT	194	6.46667	> 3 meses ≤ 1 año	Residues	300	300-500	7.8	7.8	789	Medium	0.16	low	Coarse	Sandy Loam	no	5.29	5.29	7.31	5.21	5.29	5.29	acid	7.31	5.21	neutral	1:2.5 water	1.518	17.497		5			ND
Moore et al., 2017	test	POT	194	6.46667	> 3 meses ≤ 1 año	Manure	500	300-500	9.1	9.1	924	Medium	11.51	low	Coarse	Sandy Loam	no	5.29	5.29	6.73	5.21	5.29	5.29	acid	6.73	5.21	neutral	1:2.5 water	1.518	17.497		1			ND
Moore et al., 2017	test	POT	194	6.46667	> 3 meses ≤ 1 año	Manure	500	300-500	9.1	9.1	924	Medium	11.51	low	Coarse	Sandy Loam	no	5.29	5.29	6.97	5.21	5.29	5.29	acid	6.97	5.21	neutral	1:2.5 water	1.518	17.497		5			ND
Moore et al., 2017	control	POT	194	6.46667	> 3 meses ≤ 1 año										Coarse	Sandy Loam	no	5.29	5.29	5.32	5.32	5.29	5.29	acid	5.32	5.32	acid	1:2.5 water	1.518	17.497		0			organic matter	1.74
Moore et al., 2017	test	POT	194	6.46667	> 3 meses ≤ 1 año	Residues	300	300-500	7.8	7.8	789	Medium	0.16	low	Coarse	Sandy Loam	no	5.29	5.29	6.3	5.32	5.29	5.29	acid	6.3	5.32	acid	1:2.5 water	1.518	17.497		1			ND
Moore et al., 2017	test	POT	194	6.46667	> 3 meses ≤ 1 año	Residues	300	300-500	7.8	7.8	789	Medium	0.16	low	Coarse	Sandy Loam	no	5.29	5.29	7.36	5.32	5.29	5.29	acid	7.36	5.32	neutral	1:2.5 water	1.518	17.497		5			ND
Moore et al., 2017	test	POT	194	6.46667	> 3 meses ≤ 1 año	Manure	500	300-500	9.1	9.1	924	Medium	11.51	low	Coarse	Sandy Loam	no	5.29	5.29	6.45	5.32	5.29	5.29	acid	6.45	5.32	acid	1:2.5 water	1.518	17.497		1			ND
Moore et al., 2017	test	POT	194	6.46667	> 3 meses ≤ 1 año	Manure	500	300-500	9.1	9.1	924	Medium	11.51	low	Coarse	Sandy Loam	no	5.29	5.29	6.99	5.32	5.29	5.29	acid	6.99	5.32	neutral	1:2.5 water	1.518	17.497		5			ND
Moore et al., 2017	control	POT	194	6.46667	> 3 meses ≤ 1 año										Coarse	Sandy Loam	no	5.29	5.29	5.3	5.3	5.29	5.29	acid	5.3	5.3	acid	1:2.5 water	1.518	17.497		0			organic matter	1.74
Moore et al., 2017	test	POT	194	6.46667	> 3 meses ≤ 1 año	Residues	300	300-500	7.8	7.8	789	Medium	0.16	low	Coarse	Sandy Loam	no	5.29	5.29	6.13	5.3	5.29	5.29	acid	6.13	5.3	acid	1:2.5 water	1.518	17.497		1			ND
Moore et al., 2017	test	POT	194	6.46667	> 3 meses ≤ 1 año	Residues	300	300-500	7.8	7.8	789	Medium	0.16	low	Coarse	Sandy Loam	no	5.29	5.29	7.37	5.3	5.29	5.29	acid	7.37	5.3	neutral	1:2.5 water	1.518	17.497		5			ND
Moore et al., 2017	test	POT	194	6.46667	> 3 meses ≤ 1 año	Manure	500	300-500	9.1	9.1	924	Medium	11.51	low	Coarse	Sandy Loam	no	5.29	5.29	6.33	5.3	5.29	5.29	acid	6.33	5.3	acid	1:2.5 water	1.518	17.497		1			ND
Moore et al., 2017	test	POT	194	6.46667	> 3 meses ≤ 1 año	Manure	500	300-500	9.1	9.1	924	Medium	11.51	low	Coarse	Sandy Loam	no	5.29	5.29	6.96	5.3	5.29	5.29	acid	6.96	5.3	neutral	1:2.5 water	1.518	17.497		5			ND
Kaurin et al., 2017	control	POT	104	3.46667	> 3 meses ≤ 1 año										Coarse	dry soil	yes											1:2.5 0.01 M CaCl2	1.687	55.792		0
Kaurin et al., 2017	Test	POT	105	3.5	> 3 meses ≤ 1 año				8.8						Coarse	dry soil	yes	6.8		7.1		7.33683		neutral	7.62309		alcaline	1:2.5 0.01 M CaCl2	1.687	55.792		0.75			organic carbon	5		Cd, Pb, Zn, Fe	AMBAS				6.7	1028			686		2.6
Kaurin et al., 2017	Test	POT	105	3.5	> 3 meses ≤ 1 año				8.8						Medium	dry soil	yes	5.1		5.9		5.71469		acid	6.47805		acid	1:2.5 0.01 M CaCl2	1.492	22.305		0.75			organic carbon	2.8		Cd, Pb, Zn, Fe	AMBAS				3	862			331		0.5
Soja et al., 2017	control	POT	730	24.3333	> 3 meses ≤ 1 año										Coarse	Neutral soil	no	7.2	7.2	7.2	7.2	7.92188	7.92188	alcaline	7.92188	7.92188	alcaline		1.29		0				organic carbon	0.9		Cu	INICIAL						198
Soja et al., 2017	test	POT	730	24.3333	> 3 meses ≤ 1 año	Wood	480	300-500	8.5		392	medium			Coarse	Neutral soil	no	7.2	7.2	6.89	7.2	7.92188	7.92188	alcaline	7.63049	7.92188	alcaline	1:1 CaCl2	1.29		10				ND			Cu/available Cu	FINAL						198
Soja et al., 2017	test	POT	730	24.3333	> 3 meses ≤ 1 año	Wood	480	300-500	8.5		392	medium			Coarse	Neutral soil	no	7.2	7.2	6.95	7.2	7.92188	7.92188	alcaline	7.68689	7.92188	alcaline	1:1 CaCl2	1.29		30				ND			Cu/available Cu	FINAL						198
Soja et al., 2017	test	POT	730	24.3333	> 3 meses ≤ 1 año	Wood	480	300-500	2.6		1298	high			Coarse	Neutral soil	no	7.2	7.2	6.9	7.2	7.92188	7.92188	alcaline	7.63989	7.92188	alcaline	1:1 CaCl2	1.29		30				ND			Cu/available Cu	FINAL						198
Soja et al., 2017	test	POT	730	24.3333	> 3 meses ≤ 1 año	Wood	480	300-500	2.7		1504	high			Coarse	Neutral soil	no	7.2	7.2	6.95	7.2	7.92188	7.92188	alcaline	7.68689	7.92188	alcaline	1:1 CaCl2	1.29		30				ND			Cu/available Cu	FINAL						198
Soja et al., 2017	test	POT	730	24.3333	> 3 meses ≤ 1 año	Wood	480	300-500	2.7		1504	high			Coarse	Neutral soil	no	7.2	7.2	6.94	7.2	7.92188	7.92188	alcaline	7.67749	7.92188	alcaline	1:1 CaCl2	1.29		60				ND			Cu/available Cu	FINAL						198
Soja et al., 2017	test	POT	730	24.3333	> 3 meses ≤ 1 año	Wood	480	300-500	2.7		1504	high			Coarse	Neutral soil	no	7.2	7.2	6.95	7.2	7.92188	7.92188	alcaline	7.68689	7.92188	alcaline	1:1 CaCl2	1.29		40				ND			Cu/available Cu	FINAL						198
Soja et al., 2017	control	POT	730	24.3333	> 3 meses ≤ 1 año										Coarse	Acidic soil	no	6.2	6.2	6.2	6.2	6.9819	6.9819	acid	6.9819	6.9819			1.11		0				organic carbon	2.7		Cu	INICIAL						97
Soja et al., 2017	test	POT	730	24.3333	> 3 meses ≤ 1 año	Wood	480	300-500	8.5		392	medium			Coarse	Acidic soil	no	6.2	6.2	6.71	6.2	6.9819	6.9819	acid	7.46129	6.9819	neutral	1:1 CaCl2	1.11		30				ND			Cu/available Cu	FINAL						97
Soja et al., 2017	test	POT	730	24.3333	> 3 meses ≤ 1 año	Wood	480	300-500	2.6		1298	high			Coarse	Acidic soil	no	6.2	6.2	6.67	6.2	6.9819	6.9819	acid	7.4237	6.9819	neutral	1:1 CaCl2	1.11		30				ND			Cu/available Cu	FINAL						97
Soja et al., 2017	test	POT	730	24.3333	> 3 meses ≤ 1 año	Wood	480	300-500	2.7		1504	high			Coarse	Acidic soil	no	6.2	6.2	6.75	6.2	6.9819	6.9819	acid	7.49889	6.9819	neutral	1:1 CaCl2	1.11		30				ND			Cu/available Cu	FINAL						97
Soja et al., 2017	test	POT	730	24.3333	> 3 meses ≤ 1 año	Wood	480	300-500	2.7		1504	high			Coarse	Acidic soil	no	6.2	6.2	6.79	6.2	6.9819	6.9819	acid	7.53649	6.9819	neutral	1:1 CaCl2	1.11		60				ND			Cu/available Cu	FINAL						97
Soja et al., 2017	test	POT	730	24.3333	> 3 meses ≤ 1 año	Wood	480	300-500	2.7		1504	high			Coarse	Acidic soil	no	6.2	6.2	6.51	6.2	6.9819	6.9819	acid	7.2733	6.9819	neutral	1:1 CaCl2	1.11		40				ND			Cu/available Cu	FINAL						97
Moreno-Barriga et al., 2017	control	POT	300	10	> 3 meses ≤ 1 año										Coarse	Sandy loam	no	2.82	2.82	3	3	2.82	2.82	strongly acid	3	3	strongly acid	1:2.5 water	1.629	44.619		0	7.2	3000	organic carbon - total carbon	0.084	0.07605	Cd, Pb, Cu, Zn, As	AMBAS				0.99	6636	47.3		1030
Moreno-Barriga et al., 2017	test	POT	300	10	> 3 meses ≤ 1 año	Manure	500	300-500	10.52		3990	high			Coarse	Sandy loam	no	2.82	2.82	7.9	3	2.82	2.82	strongly acid	7.9	3	alcaline	1:2.5 water	1.629	44.619		0.5		2700	total carbon		0.845	Pb, Cd concentration, As, Zn	FINAL				0.99	6636	47.3		1030
Moreno-Barriga et al., 2017	test	POT	300	10	> 3 meses ≤ 1 año	Manure	500	300-500	10.52		3990	high			Coarse	Sandy loam	no	2.82	2.82	7.95	3	2.82	2.82	strongly acid	7.95	3	alcaline	1:2.5 water	1.629	44.619		1		3000	total carbon		1.47875	Pb, Cd concentration, As, Zn	FINAL				0.99	6636	47.3		1030
Moreno-Barriga et al., 2017	test	POT	300	10	> 3 meses ≤ 1 año	Manure	500	300-500	10.52		3990	high			Coarse	Sandy loam	no	2.82	2.82	8	3	2.82	2.82	strongly acid	8	3	alcaline	1:2.5 water	1.629	44.619		0.5		2700	total carbon		1.47875	Pb, Cd concentration, As, Zn	FINAL				0.99	6636	47.3		1030
Moreno-Barriga et al., 2017	test	POT	300	10	> 3 meses ≤ 1 año	Manure	500	300-500	10.52		3990	high			Coarse	Sandy loam	no	2.82	2.82	8.2	3	2.82	2.82	strongly acid	8.2	3	alcaline	1:2.5 water	1.629	44.619		1		3000	total carbon		2.028	Pb, Cd concentration, As, Zn	FINAL				0.99	6636	47.3		1030
Moreno-Barriga et al., 2017	control	POT	300	10	> 3 meses ≤ 1 año										Coarse	Sandy loam	no	2.82	2.82	3.1	3.1	2.82	2.82	strongly acid	3.1	3.1	strongly acid	1:2.5 water	1.629	44.619		0		2700	total carbon		0.169
Moreno-Barriga et al., 2017	test	POT	300	10	> 3 meses ≤ 1 año	Manure	500	300-500	10.52		3990	high			Coarse	Sandy loam	no	2.82	2.82	7.85	3.1	2.82	2.82	strongly acid	7.85	3.1	alcaline	1:2.5 water	1.629	44.619		0.5		2.75	total carbon		0.7605
Moreno-Barriga et al., 2017	test	POT	300	10	> 3 meses ≤ 1 año	Manure	500	300-500	10.52		3990	high			Coarse	Sandy loam	no	2.82	2.82	7.87	3.1	2.82	2.82	strongly acid	7.87	3.1	alcaline	1:2.5 water	1.629	44.619		1		2.75	total carbon		1.90125
Moreno-Barriga et al., 2017	test	POT	300	10	> 3 meses ≤ 1 año	Manure	500	300-500	10.52		3990	high			Coarse	Sandy loam	no	2.82	2.82	7.95	3.1	2.82	2.82	strongly acid	7.95	3.1	alcaline	1:2.5 water	1.629	44.619		0.5		3.2	total carbon		0.88725
Moreno-Barriga et al., 2017	test	POT	300	10	> 3 meses ≤ 1 año	Manure	500	300-500	10.52		3990	high			Coarse	Sandy loam	no	2.82	2.82	8	3.1	2.82	2.82	strongly acid	8	3.1	alcaline	1:2.5 water	1.629	44.619		1		3.25	total carbon		1.47875
Maienza et al., 2017	control	FIELD	1825	60.8333	> 2 años										Coarse	acids sandy-clay-loam	no	5.37	5.37	5.5	5.5	5.37	5.37	acid	5.5	5.5	acid	1:2.5 water	1.3154		0				organic carbon	0.47	0.001116	Mg2+, Cd concentration, Pb, Cu, Available Cu, Fe, Ni, Zn, Cr	FINAL			192							2.5
Maienza et al., 2017	test	FIELD	1825	60.8333	> 2 años	Wood	500	300-500	9.8						Coarse	acids sandy-clay-loam	no	5.37	5.37	5.94	5.5	5.37	5.37	acid	5.94	5.5	acid	1:2.5 water	1.3154		30				organic carbon		0.001069	Mg2+, Cd concentration, Pb, Cu, Available Cu, Fe, Ni, Zn, Cr	FINAL			192							1.109
Maienza et al., 2017	test	FIELD	1825	60.8333	> 2 años	Wood	500	300-500	9.8						Coarse	acids sandy-clay-loam	no	5.37	5.37	7.18	5.5	5.37	5.37	acid	7.18	5.5	neutral	1:2.5 water	1.3154		60				organic carbon		0.001116	Mg2+, Cd concentration, Pb, Cu, Available Cu, Fe, Ni, Zn, Cr	FINAL			192							1.25
Maienza et al., 2017	control	FIELD	1825	60.8333	> 2 años										Coarse	acids sandy-clay-loam	no	5.37	5.37	5.24	5.24	5.37	5.37	acid	5.24	5.24	acid	1:2.5 water	1.3154		0				organic carbon		0.001151	Mg2+, Cd concentration, Pb, Cu, Available Cu, Fe, Ni, Zn, Cr	FINAL										1.25
Maienza et al., 2017	test	FIELD	1825	60.8333	> 2 años	Wood	500	300-500	9.8						Coarse	acids sandy-clay-loam	no	5.37	5.37	6.35	5.24	5.37	5.37	acid	6.35	5.24	acid	1:2.5 water	1.3154		30				organic carbon		0.001199	Mg2+, Cd concentration, Pb, Cu, Available Cu, Fe, Ni, Zn, Cr	FINAL										2.86
Maienza et al., 2017	test	FIELD	1825	60.8333	> 2 años	Wood	500	300-500	9.8						Coarse	acids sandy-clay-loam	no	5.37	5.37	6.55	5.24	5.37	5.37	acid	6.55	5.24	acid	1:2.5 water	1.3154		60				organic carbon		0.001274	Mg2+, Cd concentration, Pb, Cu, Available Cu, Fe, Ni, Zn, Cr	FINAL										1.83
Maienza et al., 2017	control	FIELD	1825	60.8333	> 2 años										Coarse	acids sandy-clay-loam	no	5.37	5.37	5.94	5.94	5.37	5.37	acid	5.94	5.94	acid	1:2.5 water	1.3154		0				organic carbon		0.00127	Mg2+, Cd concentration, Pb, Cu, Available Cu, Fe, Ni, Zn, Cr	FINAL										1.31
Maienza et al., 2017	test	FIELD	1825	60.8333	> 2 años	Wood	500	300-500	9.8						Coarse	acids sandy-clay-loam	no	5.37	5.37	6.54	5.94	5.37	5.37	acid	6.54	5.94	acid	1:2.5 water	1.3154		30				organic carbon		0.001917	Mg2+, Cd concentration, Pb, Cu, Available Cu, Fe, Ni, Zn, Cr	FINAL										2.94
Maienza et al., 2017	test	FIELD	1825	60.8333	> 2 años	Wood	500	300-500	9.8						Coarse	acids sandy-clay-loam	no	5.37	5.37	7.31	5.94	5.37	5.37	acid	7.31	5.94	neutral	1:2.5 water	1.3154		30				organic carbon		0.001106	Mg2+, Cd concentration, Pb, Cu, Available Cu, Fe, Ni, Zn, Cr	FINAL										2.83
Meier et al., 2015a	control	POT	14	0.466667	≤ 3 meses										Fine	fine sandy loam	no	5.76	5.76	5.35	5.35	5.97996	5.97996	acid	5.58185	5.58	acid	1:1 water				0		672	organic matter	1.74		P, K, Cu, Zn	INICIAL	11		21			338		17
Meier et al., 2015a	test	POT	14	0.466667	≤ 3 meses	Manure	500	300-500	9.1	9.1	924	Medium	11.51	low	Fine	fine sandy loam	no	5.76	5.76	6.29	5.35	5.97996	5.97996	acid	6.49459	5.58	acid	1:1 water				1		626	ND			Cu	FINAL	11		21			338		17
Meier et al., 2015a	test	POT	14	0.466667	≤ 3 meses	Residues	300	300-500	7.8	7.8	789	Medium	0.16	low	Fine	fine sandy loam	no	5.76	5.76	6.57	5.35	5.97996	5.97996	acid	6.76647	5.58	neutral	1:1 water				1		566	ND			Cu	FINAL	11		21			338		17
Meier et al., 2015a	test	POT	14	0.466667	≤ 3 meses	Manure	500	300-500	9.1	9.1	924	Medium	11.51	low	Fine	fine sandy loam	no	5.76	5.76	6.45	5.35	5.97996	5.97996	acid	6.64995	5.58	neutral	1:1 water				5		663	ND			Cu	FINAL	11		21			338		17
Meier et al., 2015a	test	POT	14	0.466667	≤ 3 meses	Residues	300	300-500	7.8	7.8	789	Medium	0.16	low	Fine	fine sandy loam	no	5.76	5.76	7.04	5.35	5.97996	5.97996	acid	7.22284	5.58	neutral	1:1 water				5		583	ND			Cu	FINAL	11		21			338		17
Meier et al., 2015b	control	POT	90	3	≤ 3 meses										Coarse	Sandy soil	no	5.76	5.76	6.67	6.67	5.97996	5.97996	acid	6.86357	6.86	neutral	1:1 water				0		66.9	organic matter	1.74		P, Mg, Ca, K, Cu, Zn	INICIAL	11		21			338		17
Meier et al., 2015b	control	POT	90	3	≤ 3 meses										Coarse	Sandy soil	no	5.76	5.76	6.02	6.02	5.97996	5.97996	acid	6.23242	6.23	acid	1:1 water				0		210.1	ND			Cu	FINAL	11		21			338		17
Meier et al., 2015b	control	POT	90	3	≤ 3 meses										Coarse	Sandy soil	no	5.76	5.76			5.97996	5.97996	acid				1:1 water				0			ND			Cu	FINAL	11		21			338		17
Meier et al., 2015b	test	POT	90	3	≤ 3 meses	Manure	500	300-500	9.1	9.1	924	Medium	11.51	low	Coarse	Sandy soil	no	5.76	5.76	6.86	6.67	5.97996	5.97996	acid	7.04806	6.86	neutral	1:1 water				5		912	ND			Cu	FINAL	11		21			338		17
Meier et al., 2015b	test	POT	90	3	≤ 3 meses	Manure	500	300-500	9.1	9.1	924	Medium	11.51	low	Coarse	Sandy soil	no	5.76	5.76	6.99	6.02	5.97996	5.97996	acid	7.17429	6.23	neutral	1:1 water				5		359	ND			Cu	FINAL	11		21			338		17
Meier et al., 2015b	test	POT	90	3	≤ 3 meses	Manure	500	300-500	9.1	9.1	924	Medium	11.51	low	Coarse	Sandy soil	no	5.76	5.76			5.97996	5.97996	acid				1:1 water				5			ND			Cu	FINAL	11		21			338		17
Meier et al., 2015b	test	POT	90	3	≤ 3 meses	Manure	500	300-500	9.1	9.1	924	Medium	11.51	low	Coarse	Sandy soil	no	5.76	5.76	6.52	6.67	5.97996	5.97996	acid	6.71792	6.86	neutral	1:1 water				10		794	ND			Cu	FINAL	11		21			338		17
Meier et al., 2015b	test	POT	90	3	≤ 3 meses	Manure	500	300-500	9.1	9.1	924	Medium	11.51	low	Coarse	Sandy soil	no	5.76	5.76	7.28	6.02	5.97996	5.97996	acid	7.45588	6.23	neutral	1:1 water				10		503.7	ND			Cu	FINAL	11		21			338		17
Meier et al., 2015b	test	POT	90	3	≤ 3 meses	Manure	500	300-500	9.1	9.1	924	Medium	11.51	low	Coarse	Sandy soil	no	5.76	5.76	6.81		5.97996	5.97996	acid	6.99951		neutral	1:1 water				10		576	ND			Cu	FINAL	11		21			338		17
Domene et al., 2015	control	POT	28	0.933333	≤ 3 meses										Coarse	42% sand, 31% silt and 27% clay	no	7	7			7.31994	7.32	neutral				1:20 1N KCl	1.367	4.267		0			total carbon	1.3689
Domene et al., 2015	test	POT	28	0.933333	≤ 3 meses	Manure	350	300-500	7.51	7.38	2180	high			Coarse	42% sand, 31% silt and 27% clay	no		7				7.32	neutral				1:20 1N KCl	1.367	4.267		2			ND
Domene et al., 2015	test	POT	28	0.933333	≤ 3 meses	Manure	350	300-500	7.51	7.38	2180	high			Coarse	42% sand, 31% silt and 27% clay	no		7				7.32	neutral				1:20 1N KCl	1.367	4.267		14			ND
Domene et al., 2015	control	POT	28	0.933333	≤ 3 meses										Coarse	42% sand, 31% silt and 27% clay	no	7	7			7.31994	7.32	neutral				1:20 1N KCl	1.367	4.267		0			total carbon	1.3689
Domene et al., 2015	test	POT	28	0.933333	≤ 3 meses	Manure	550	501-700	10.57	10.5	2770	high			Coarse	42% sand, 31% silt and 27% clay	no		7				7.32	neutral				1:20 1N KCl	1.367	4.267		2			ND
Domene et al., 2015	test	POT	28	0.933333	≤ 3 meses	Manure	550	501-700	10.57	10.5	2770	high			Coarse	42% sand, 31% silt and 27% clay	no		7				7.32	neutral				1:20 1N KCl	1.367	4.267		14			ND
Domene et al., 2015	control	POT	28	0.933333	≤ 3 meses										Coarse	42% sand, 31% silt and 27% clay	no	7	7			7.31994	7.32	neutral				1:20 1N KCl	1.367	4.267		0			total carbon	1.3689
Domene et al., 2015	test	POT	28	0.933333	≤ 3 meses	Residues	350	300-500	7.81	7.82	1730	high			Coarse	42% sand, 31% silt and 27% clay	no		7				7.32	neutral				1:20 1N KCl	1.367	4.267		2			ND
Domene et al., 2015	test	POT	28	0.933333	≤ 3 meses	Residues	350	300-500	7.81	7.82	1730	high			Coarse	42% sand, 31% silt and 27% clay	no		7				7.32	neutral				1:20 1N KCl	1.367	4.267		14			ND
Domene et al., 2015	control	POT	28	0.933333	≤ 3 meses										Coarse	42% sand, 31% silt and 27% clay	no	7	7			7.31994	7.32	neutral				1:20 1N KCl	1.367	4.267		0			total carbon	1.3689
Domene et al., 2015	test	POT	28	0.933333	≤ 3 meses	Residues	550	501-700	10.02	9.96	1290	high			Coarse	42% sand, 31% silt and 27% clay	no		7				7.32	neutral				1:20 1N KCl	1.367	4.267		2			ND
Domene et al., 2015	test	POT	28	0.933333	≤ 3 meses	Residues	550	501-700	10.02	9.96	1290	high			Coarse	42% sand, 31% silt and 27% clay	no		7				7.32	neutral				1:20 1N KCl	1.367	4.267		14			ND
Domene et al., 2015	control	POT	28	0.933333	≤ 3 meses										Coarse	42% sand, 31% silt and 27% clay	no	7	7			7.31994	7.32	neutral				1:20 1N KCl	1.367	4.267		0			total carbon	1.3689
Domene et al., 2015	test	POT	28	0.933333	≤ 3 meses	Manure	300	300-500	8.2	8.204	1870	high			Coarse	42% sand, 31% silt and 27% clay	no		7				7.32	neutral				1:20 1N KCl	1.367	4.267		2			ND
Domene et al., 2015	test	POT	28	0.933333	≤ 3 meses	Manure	300	300-500	8.2	8.204	1870	high			Coarse	42% sand, 31% silt and 27% clay	no		7				7.32	neutral				1:20 1N KCl	1.367	4.267		14			ND
Domene et al., 2015	control	POT	28	0.933333	≤ 3 meses										Coarse	42% sand, 31% silt and 27% clay	no	7	7			7.31994	7.32	neutral				1:20 1N KCl	1.367	4.267		0			total carbon	1.3689
Domene et al., 2015	test	POT	28	0.933333	≤ 3 meses	Manure	600	501-700	10.37	10.3089	1650	high			Coarse	42% sand, 31% silt and 27% clay	no		7				7.32	neutral				1:20 1N KCl	1.367	4.267		2			ND
Domene et al., 2015	test	POT	28	0.933333	≤ 3 meses	Manure	600	501-700	10.37	10.3089	1650	high			Coarse	42% sand, 31% silt and 27% clay	no		7				7.32	neutral				1:20 1N KCl	1.367	4.267		14			ND
Domene et al., 2015	control	POT	28	0.933333	≤ 3 meses										Coarse	42% sand, 31% silt and 27% clay	no	7	7			7.31994	7.32	neutral				1:20 1N KCl	1.367	4.267		0			total carbon	1.3689
Domene et al., 2015	test	POT	28	0.933333	≤ 3 meses	Residues	300	300-500	7.5	7.525	4370	high			Coarse	42% sand, 31% silt and 27% clay	no		7				7.32	neutral				1:20 1N KCl	1.367	4.267		14			ND
Domene et al., 2015	control	POT	28	0.933333	≤ 3 meses										Coarse	42% sand, 31% silt and 27% clay	no	7	7			7.31994	7.32	neutral				1:20 1N KCl	1.367	4.267		0			ND
Domene et al., 2015	test	POT	28	0.933333	≤ 3 meses	Residues	600	501-700	10.1	10.047	4280	high			Coarse	42% sand, 31% silt and 27% clay	no		7				7.32	neutral				1:20 1N KCl	1.367	4.267		14			total carbon	1.3689
Domene et al., 2015	control	POT	28	0.933333	≤ 3 meses										Coarse	42% sand, 31% silt and 27% clay	no	7	7			7.31994	7.32	neutral				1:20 1N KCl	1.367	4.267		0			ND
Domene et al., 2015	test	POT	28	0.933333	≤ 3 meses	Wood	350	300-500	4.49	4.6053	60	low			Coarse	42% sand, 31% silt and 27% clay	no		7				7.32	neutral				1:20 1N KCl	1.367	4.267		2			total carbon	1.3689
Domene et al., 2015	test	POT	28	0.933333	≤ 3 meses	Wood	350	300-500	4.49	4.6053	60	low			Coarse	42% sand, 31% silt and 27% clay	no		7				7.32	neutral				1:20 1N KCl	1.367	4.267		14			ND
Domene et al., 2015	control	POT	28	0.933333	≤ 3 meses										Coarse	42% sand, 31% silt and 27% clay	no	7	7			7.31994	7.32	neutral				1:20 1N KCl	1.367	4.267		0			total carbon	1.3689
Domene et al., 2015	test	POT	28	0.933333	≤ 3 meses	Wood	550	501-700	7.42	7.4474	30	low			Coarse	42% sand, 31% silt and 27% clay	no		7				7.32	neutral				1:20 1N KCl	1.367	4.267		2			ND
Domene et al., 2015	test	POT	28	0.933333	≤ 3 meses	Wood	550	501-700	7.42	7.4474	30	low			Coarse	42% sand, 31% silt and 27% clay	no		7				7.32	neutral				1:20 1N KCl	1.367	4.267		14			ND
Domene et al., 2015	control	POT	28	0.933333	≤ 3 meses										Coarse	42% sand, 31% silt and 27% clay	no	7	7			7.31994	7.32	neutral				1:20 1N KCl	1.367	4.267		0			total carbon	1.3689
Domene et al., 2015	test	POT	28	0.933333	≤ 3 meses	Residues	300	300-500	7.58	7.6026	450	Medium			Coarse	42% sand, 31% silt and 27% clay	no		7				7.32	neutral				1:20 1N KCl	1.367	4.267		14			ND
Domene et al., 2015	control	POT	28	0.933333	≤ 3 meses										Coarse	42% sand, 31% silt and 27% clay	no	7	7			7.31994	7.32	neutral				1:20 1N KCl	1.367	4.267		0			total carbon	1.3689
Domene et al., 2015	test	POT	28	0.933333	≤ 3 meses	Residues	600	501-700	9.28	9.2516	180	Medium			Coarse	42% sand, 31% silt and 27% clay	no		7				7.32	neutral				1:20 1N KCl	1.367	4.267		14			ND
Domene et al., 2015	control	POT	28	0.933333	≤ 3 meses										Coarse	42% sand, 31% silt and 27% clay	no	7	7			7.31994	7.32	neutral				1:20 1N KCl	1.367	4.267		0			total carbon	1.3689
Domene et al., 2015	test	POT	28	0.933333	≤ 3 meses	Wood	350	300-500	4.72	4.8284	70	low			Coarse	42% sand, 31% silt and 27% clay	no		7				7.32	neutral				1:20 1N KCl	1.367	4.267		2			ND
Domene et al., 2015	test	POT	28	0.933333	≤ 3 meses	Wood	350	300-500	4.72	4.8284	70	low			Coarse	42% sand, 31% silt and 27% clay	no		7				7.32	neutral				1:20 1N KCl	1.367	4.267		14			ND
Domene et al., 2015	control	POT	28	0.933333	≤ 3 meses										Coarse	42% sand, 31% silt and 27% clay	no	7	7			7.31994	7.32	neutral				1:20 1N KCl	1.367	4.267		0			total carbon	1.3689
Domene et al., 2015	test	POT	28	0.933333	≤ 3 meses	Wood	550	501-700	6.23	6.2931	20	low			Coarse	42% sand, 31% silt and 27% clay	no		7				7.32	neutral				1:20 1N KCl	1.367	4.267		2			ND
Domene et al., 2015	test	POT	28	0.933333	≤ 3 meses	Wood	550	501-700	6.23	6.2931	20	low			Coarse	42% sand, 31% silt and 27% clay	no		7				7.32	neutral				1:20 1N KCl	1.367	4.267		14			ND
Mackie et al., 2015	control	FIELD	365	12.1667	> 1 año ≤ 2 años										Fine	Haplic Regosol. 47% gravel and 53% fine soil (26% clay, 32% silt, 42% sand)	no	7.7	7.7			8.03848	8.04	alcaline				1:10 0.01M CaCl2	1.353	5.411	0				organic carbon / total carbon	0.0066	0.0047	Cu	AMBAS						142
Mackie et al., 2015	test	FIELD	365	12.1667	> 1 año ≤ 2 años	Wood	750	>700	9.5	8.78	578	Medium	144	medium	Fine	Haplic Regosol. 47% gravel and 53% fine soil (26% clay, 32% silt, 42% sand)	no	7.7	7.7			8.03848	8.04	alcaline				1:10 0.01M CaCl2	1.353	5.411	8				organic carbon / total carbon	0.0054	0.00465	Cu	AMBAS						150
Mackie et al., 2015	test	FIELD	365	12.1667	> 1 año ≤ 2 años	Wood	750	>700	9.5	8.78	578	Medium	144	medium	Fine	Haplic Regosol. 47% gravel and 53% fine soil (26% clay, 32% silt, 42% sand)	no	7.2	7.7			7.55298	8.04	neutral				1:10 0.01M CaCl2	1.353	5.411	8				organic carbon / total carbon	0.009	0.0077	Cu	AMBAS						123
Cui et al., 2013	control	FIELD	365	12.1667	> 1 año ≤ 2 años										Fine	Paddy soil Production field	yes	6.07	6.07	6.18	6.18	6.28097	6.28	acid	6.38778	6.39	acid	1:1 water			0				organic carbon	2.071	2.199	P, K, Cd, Pb	AMBAS	820		11400	21.84	603.31					26.09
Cui et al., 2013	test	FIELD	365	12.1667	> 1 año ≤ 2 años	Straw	450	300-500	10.35						Fine	Paddy soil Production field	yes	6.07	6.07	6.29	6.18	6.28097	6.28	acid	6.49459	6.39	acid	1:1 water			10				organic carbon		2.555	Cd, Pb	FINAL	820		11400	21.84	603.31					23.83
Cui et al., 2013	test	FIELD	365	12.1667	> 1 año ≤ 2 años	Straw	450	300-500	10.35						Fine	Paddy soil Production field	yes	6.07	6.07	6.45	6.18	6.28097	6.28	acid	6.64995	6.39	neutral	1:1 water			20				organic carbon		2.928	Cd, Pb	FINAL	820		11400	21.84	603.31					24.98
Cui et al., 2013	test	FIELD	365	12.1667	> 1 año ≤ 2 años	Straw	450	300-500	10.35						Fine	Paddy soil Production field	yes	6.07	6.07	6.47	6.18	6.28097	6.28	acid	6.66937	6.39	neutral	1:1 water			40				organic carbon		3.32	Cd, Pb	FINAL	820		11400	21.84	603.31					24
Khan et al., 2022	control	POT	90	3	≤ 3 meses											red acidic soil. The soil was categorized as Eutric Cambisol and ferrosols	no	5.69	5.69	5.6	5.6	5.69	5.69	acid	5.6	5.6	acid	1:2.5 water				0	180		organic carbon	0.76895	1.001	P, K	AMBAS	500		13700
Khan et al., 2022	test	POT	90	3	≤ 3 meses	Straw	350	300-500	10.76	10.6872	7110	high					no	5.69	5.69	7.3	5.6	5.69	5.69	acid	7.3	5.6	neutral	1:2.5 water				1	180		organic carbon		2.65	K	FINAL	500		13700
Khan et al., 2022	test	POT	90	3	≤ 3 meses	Straw	350	300-500	10.76	10.6872	7110	high					no	5.69	5.69	8.3	5.6	5.69	5.69	acid	8.3	5.6	alcaline	1:2.5 water				2.5	180		organic carbon		3.36	K	FINAL	500		13700
Khan et al., 2022	test	POT	90	3	≤ 3 meses	Straw	350	300-500	9.67	9.6299	10130	high					no	5.69	5.69	6.4	5.6	5.69	5.69	acid	6.4	5.6	acid	1:2.5 water				1	180		organic carbon		2.49	K	FINAL	500		13700
Khan et al., 2022	test	POT	90	3	≤ 3 meses	Straw	350	300-500	9.67	9.6299	10130	high					no	5.69	5.69	7.8	5.6	5.69	5.69	acid	7.8	5.6	alcaline	1:2.5 water				2.5	180		organic carbon		2.91	K	FINAL	500		13700
Zhang et al., 2021	control	POT	20	0.666667	≤ 3 meses											A novel green substrate was prepared by mixing SSAD and its biochar (SSBC) filled with perlite and quartz sand for plant growth	no	4.6	4.6			5.2376	5.24	acid				1:2.5 0.01 M CaCl2				0			organic matter	2.4824		P, K, Cu Ni, Zn, Cr	INICIAL	814.31		7240			28.6	53.08	65.88	41.08
Zhang et al., 2021	test	POT	20	0.666667	≤ 3 meses	Sludge	501-700	600	8.09				111.8	medium			no	4.6	4.6			5.2376	5.24	acid				1:2.5 0.01 M CaCl2				40			ND					814.31		7240			28.6	53.08	65.88	41.08
Xu et al., 2019	control	INCUBATION	84	2.8	≤ 3 meses										Fine	Paddy Soil	yes	6.25	6.25			6.17172	6.17	acid				1:5 water				0			organic matter	2.1924		P, Cr, Available phosphorus	AMBAS	64								115
Xu et al., 2019	test	INCUBATION	84	2.8	≤ 3 meses	Manure	500	300-500	10.6	10.6					Fine	Paddy Soil	yes	6.25	6.25			6.17172	6.17	acid				1:5 water				1			organic matter			Available phosphorus	FINAL	64								115
Xu et al., 2019	test	INCUBATION	84	2.8	≤ 3 meses	Wood	500	300-500	8.39	8.39					Fine	Paddy Soil	yes	6.25	6.25			6.17172	6.17	acid				1:5 water				1			organic matter			Available phosphorus	FINAL	64								115
Xu et al., 2019	control	INCUBATION	84	2.8	≤ 3 meses										Fine	Paddy Soil	yes	6.25	6.25			6.17172	6.17	acid				1:5 water				0			organic matter			Available phosphorus	FINAL
Xu et al., 2019	test	INCUBATION	84	2.8	≤ 3 meses	Manure	500	300-500	10.6	10.6					Fine	Paddy Soil	yes	6.25	6.25			6.17172	6.17	acid				1:5 water				1			organic matter			Available phosphorus	FINAL
Xu et al., 2019	test	INCUBATION	84	2.8	≤ 3 meses	Wood	500	300-500	8.39	8.39					Fine	Paddy Soil	yes	6.25	6.25			6.17172	6.17	acid				1:5 water				1			organic matter			Available phosphorus	FINAL
Latini et al., 2019	control	POT	42	1.4	≤ 3 meses										Coarse	sandy loam soil	yes	5.17	5.17	6.56	6.56	5.40707	5.41	acid	6.75676	6.76	neutral	1:1 water	1.21			0		93.6	organic carbon	2.31	1.96	Mg2+, Ca2+, Pb, Fe, Zn, K	FINAL			982		53			48
Latini et al., 2019	control	POT	42	1.4	≤ 3 meses										Coarse	sandy loam soil	yes	5.17	5.17	6.53	6.56	5.40707	5.41	acid	6.72763	6.73	neutral	1:1 water	1.21			0		103.1	organic carbon	2.31	1.94	Mg2+, Ca2+, Pb, Fe, Zn, K	FINAL			982		53			48
Latini et al., 2019	test	POT	42	1.4	≤ 3 meses	Wood	700	501-700	9.78		469	medium	485	high	Coarse	sandy loam soil	yes	5.17	5.17	6.44	6.56	5.40707	5.41	acid	6.64024	6.76	neutral	1:1 water	1.21			3		66.8	organic carbon		3.69	Mg2+, Ca2+, Pb, Fe, Zn, K	FINAL			982		53			48
Latini et al., 2019	test	POT	42	1.4	≤ 3 meses	Wood	700	501-700	9.78		469	medium	485	high	Coarse	sandy loam soil	yes	5.17	5.17	6.73	6.56	5.40707	5.41	acid	6.92183	6.76	neutral	1:1 water	1.21			3		95.1	organic carbon		3.1	Mg2+, Ca2+, Pb, Fe, Zn, K	FINAL			982		53			48
Latini et al., 2019	test	POT	42	1.4	≤ 3 meses	Straw	700	501-700	10.3		1520	high	23.2	low	Coarse	sandy loam soil	yes	5.17	5.17	6.51	6.56	5.40707	5.41	acid	6.70821	6.76	neutral	1:1 water	1.21			3		123.2	organic carbon		2.6	Mg2+, Ca2+, Pb, Fe, Zn, K	FINAL			982		53			48
Latini et al., 2019	test	POT	42	1.4	≤ 3 meses	Wood	700	501-700	9.78		469	medium	485	high	Coarse	sandy loam soil	yes	5.17	5.17	6.4	6.56	5.40707	5.41	acid	6.6014	6.73	neutral	1:1 water	1.21			3		74.6	organic carbon		3.97	Mg2+, Ca2+, Pb, Fe, Zn, K	FINAL			982		53			48
Latini et al., 2019	test	POT	42	1.4	≤ 3 meses	Wood	700	501-700	9.78		469	medium	485	high	Coarse	sandy loam soil	yes	5.17	5.17	6.73	6.56	5.40707	5.41	acid	6.92183	6.73	neutral	1:1 water	1.21			3		91.5	organic carbon		2.96	Mg2+, Ca2+, Pb, Fe, Zn, K	FINAL			982		53			48
Latini et al., 2019	test	POT	42	1.4	≤ 3 meses	Straw	700	501-700	10.3		1520	high	23.2	low	Coarse	sandy loam soil	yes	5.17	5.17	6.56	6.56	5.40707	5.41	acid	6.75676	6.73	neutral	1:1 water	1.21			3		129.6	organic carbon		3.52	Mg2+, Ca2+, Pb, Fe, Zn, K	FINAL			982		53			48
Zhang et al., 2019	control	POT	28	0.933333	≤ 3 meses											yellow-brown soil	yes	5.37	5.37	5.37	5.37	5.60127	5.6	acid	5.60127	5.6	acid	ND				0			organic matter	0.7424		P, K	INICIAL	49.21		138.33
Zhang et al., 2019	test	POT	28	0.933333	≤ 3 meses	Residues	400	300-500	8.76							yellow-brown soil	yes	5.37	5.37	6.05	5.37	5.60127	5.6	acid	6.26155	5.6	acid	ND				2			organic matter		1.3224	K, Available phosphorus	FINAL	49.21		138.33
Zhang et al., 2019	test	POT	28	0.933333	≤ 3 meses	Residues	400	300-500	8.76							yellow-brown soil	yes	5.37	5.37	6.38	5.37	5.60127	5.6	acid	6.58198	5.6	acid	ND				2			organic matter		1.30906	K, Available phosphorus	FINAL	49.21		138.33
Zhang et al., 2019	control	POT	28	0.933333	≤ 3 meses										Medium	fluvo-aquic soil	yes	6.05	6.05	6.05	6.05	6.26155	6.26	acid	6.26	6.26	neutral	ND				0			organic matter	0.48778		P, K	INICIAL	15.92		63
Zhang et al., 2019	test	POT	28	0.933333	≤ 3 meses	Residues	400	300-500	8.76						Medium	fluvo-aquic soil	yes	6.05	6.05	6.71	6.05	6.26155	6.26	acid	6.90241	6.26	neutral	ND				2			organic matter		0.92626	K, Available phosphorus	FINAL	15.92		63
Zhang et al., 2019	test	POT	28	0.933333	≤ 3 meses	Residues	400	300-500	8.76						Medium	fluvo-aquic soil	yes	6.05	6.05	6.57	6.05	6.26155	6.26	acid	6.76647	6.26	neutral	ND				2			organic matter		0.93032	K, Available phosphorus	FINAL	15.92		63
Zhang et al., 2019	control	POT	28	0.933333	≤ 3 meses											lou soil	yes	8.27	8.27	8.27	8.27	8.41717	8.42	alcaline	8.27	8.27	alcaline	ND				0			organic matter	1.02892		P, K	INICIAL	26.99		276
Zhang et al., 2019	test	POT	28	0.933333	≤ 3 meses	Residues	400	300-500	8.76							lou soil	yes	8.27	8.27	8.27	8.27	8.41717	8.42	alcaline	8.41717	8.27	alcaline	ND				2			organic matter		1.7951	K, Available phosphorus	FINAL	26.99		276
Zhang et al., 2019	test	POT	28	0.933333	≤ 3 meses	Residues	400	300-500	8.76							lou soil	yes	8.27	8.27	8.23	8.27	8.41717	8.42	alcaline	8.37833	8.27	alcaline	ND				2			organic matter		1.68664	K, Available phosphorus	FINAL	26.99		276
Zhang et al., 2019	control	POT	28	0.933333	≤ 3 meses										Fine	black soil	yes	9.13	9.13	9.13	9.13	9.25223	9.25	strongly alcaline	9.25223	9.25	strongly alcaline	ND				0			organic matter	2.4766		P, K	INICIAL	6.99		249.33
Zhang et al., 2019	test	POT	28	0.933333	≤ 3 meses	Residues	400	300-500	8.76						Fine	black soil	yes	9.13	9.13	8.89	9.13	9.25223	9.25	strongly alcaline	9.01919	9.25	strongly alcaline	ND				2			organic matter		3.24568	K, Available phosphorus	FINAL	6.99		249.33
Zhang et al., 2019	test	POT	28	0.933333	≤ 3 meses	Residues	400	300-500	8.76						Fine	black soil	yes	9.13	9.13	8.47	9.13	9.25223	9.25	strongly alcaline	8.61137	9.25	alcaline	ND				2			organic matter		3.3002	K, Available phosphorus	FINAL	6.99		249.33
Zhou et al., 2018	control	POT	244	8.13333	> 3 ≤ 1 año										Coarse	calcareous sandy loam	no	7.79	7.79	7.72	7.72	7.79	7.79	alcaline	7.72	7.72	alcaline	1:2.5 water				0			organic carbon- organic matter	3.72	2.4244	P, K	INICIAL	50		170
Zhou et al., 2018	test	POT	244	8.13333	> 3 ≤ 1 año	Wood	500	300-500	8.89						Coarse	calcareous sandy loam	no	7.79	7.79	7.73	7.72	7.79	7.79	alcaline	7.73	7.72	alcaline	1:2.5 water				0.5			organic matter	2.5288	2.4708			50		170
Zhou et al., 2018	test	POT	244	8.13333	> 3 ≤ 1 año	Wood	500	300-500	8.89						Coarse	calcareous sandy loam	no	7.79	7.79	7.76	7.72	7.79	7.79	alcaline	7.76	7.72	alcaline	1:2.5 water				1			organic matter		2.6738			50		170
Zhou et al., 2018	test	POT	244	8.13333	> 3 ≤ 1 año	Wood	500	300-500	8.89						Coarse	calcareous sandy loam	no	7.79	7.79	7.79	7.72	7.79	7.79	alcaline	7.79	7.72	alcaline	1:2.5 water				2			organic matter		2.9232			50		170
Zhou et al., 2018	test	POT	244	8.13333	> 3 ≤ 1 año	Wood	500	300-500	8.89						Coarse	calcareous sandy loam		7.79	7.79	7.83	7.72	7.79	7.79	alcaline	7.83	7.72	alcaline	1:2.5 water				4			organic matter		3.2944			50		170
Xu et al., 2017	control	POT		0											Fine	paddy soil - heavy metal polluted	no	5.9	5.9			6.1159	6.12	acid				1:1 water	1.08			0			organic matter		18.154	As, Cd, Pb, Cu, Ni, Zn, Cr, K, Available phosphorus	AMBAS		32.31		13.15	87.28	38.54	25.95	1578.67	114.28	3.562
Xu et al., 2017	test	POT		0		Residues	600	501-700	10.01	10.1			245.6	high	Fine	paddy soil - heavy metal polluted	no	5.9	5.9			6.1159	6.12	acid				1:1 water	1.08			0.5			organic matter		20.3	Cd concentration, Cu, Ni, As, Zn, K, Available phosphorus	FINAL		32.31		13.15	87.28	38.54	25.95	1578.67	114.28	2.705
Xu et al., 2017	test	POT		0		Residues	600	501-700	10.01	10.1			245.6	high	Fine	paddy soil - heavy metal polluted	no	5.9	5.9			6.1159	6.12	acid				1:1 water	1.08			1			organic matter		21.054	Cd concentration, Cu, Ni, As, Zn, K, Available phosphorus	FINAL		32.31		13.15	87.28	38.54	25.95	1578.67	114.28	2.313
Xu et al., 2017	test	POT		0		Residues	600	501-700	10.01	10.1			245.6	high	Fine	paddy soil - heavy metal polluted	no	5.9	5.9			6.1159	6.12	acid				1:1 water	1.08			2			organic matter		22.272	Cd concentration, Cu, Ni, As, Zn, K, Available phosphorus	FINAL		32.31		13.15	87.28	38.54	25.95	1578.67	114.28	2.036
Moreno-Barriga et al., 2017	control	POT	150	5	> 3 ≤ 1 año										Coarse	sandy loam soil	no	8	8	3	3	8	8	alcaline	3	3	strongly acid	1:2.5 water	1.629	44.619		0		3000	organic matter- total carbon	2	0.07605
Moreno-Barriga et al., 2017	test	POT	150	5	> 3 ≤ 1 año	Manure	500	300-500	10.52		3990	high			Coarse	sandy loam soil	no	8	8	7.9	3	8	8	alcaline	7.9	3	alcaline	1:2.5 water	1.629	44.619		0.5		2700	total carbon		0.845
Moreno-Barriga et al., 2017	test	POT	150	5	> 3 ≤ 1 año	Manure	500	300-500	10.52		3990	high			Coarse	sandy loam soil	no	8	8	7.95	3	8	8	alcaline	7.95	3	alcaline	1:2.5 water	1.629	44.619		1		40	total carbon		1.47875
Moreno-Barriga et al., 2017	test	POT	150	5	> 3 ≤ 1 año	Manure	500	300-500	10.52		3990	high			Coarse	sandy loam soil	no	8	8	8	3	8	8	alcaline	8	3	alcaline	1:2.5 water	1.629	44.619		0.5		3.1	total carbon		1.47875
Moreno-Barriga et al., 2017	test	POT	150	5	> 3 ≤ 1 año	Manure	500	300-500	10.52		3990	high			Coarse	sandy loam soil	no	8	8	8.2	3	8	8	alcaline	8.2	3	alcaline	1:2.5 water	1.629	44.619		1		3.7	total carbon		2.2815
Moreno-Barriga et al., 2017	control	POT	300	10	> 3 ≤ 1 año										Coarse	sandy loam soil	no	8	8	3.1	3.1	8	8	alcaline	3.1	3.1	strongly acid	1:2.5 water	1.629	44.619		0		2700	total carbon		0.169
Moreno-Barriga et al., 2017	test	POT	300	10	> 3 ≤ 1 año	Manure	500	300-500	10.52		3990	high			Coarse	sandy loam soil	no	8	8	7.85	3.1	8	8	alcaline	7.85	3.1	alcaline	1:2.5 water	1.629	44.619		0.5		2.75	total carbon		0.7605
Moreno-Barriga et al., 2017	test	POT	300	10	> 3 ≤ 1 año	Manure	500	300-500	10.52		3990	high			Coarse	sandy loam soil	no	8	8	7.87	3.1	8	8	alcaline	7.87	3.1	alcaline	1:2.5 water	1.629	44.619		1		2.75	total carbon		1.90125
Moreno-Barriga et al., 2017	test	POT	300	10	> 3 ≤ 1 año	Manure	500	300-500	10.52		3990	high			Coarse	sandy loam soil	no	8	8	7.95	3.1	8	8	alcaline	7.95	3.1	alcaline	1:2.5 water	1.629	44.619		0.5		3.2	total carbon		0.88725
Moreno-Barriga et al., 2017	test	POT	300	10	> 3 ≤ 1 año	Manure	500	300-500	10.52		3990	high			Coarse	sandy loam soil	no	8	8	8	3.1	8	8	alcaline	8	3.1	alcaline	1:2.5 water	1.629	44.619		1		3.25	total carbon		1.47875
Agegnehu et al., 2015	control	FIELD	145	4.83333	> 3 ≤ 1 año										Fine	dark reddish brown Ferralsol (0-30 cm profundidad)	yes	5.6	5.6	5.76	5.76	5.6	5.6	acid	5.76	5.76	acid	1:2.5 water	0.75		0		0.13	40	organic carbon	2.01		P, Ca, Zn	INICIAL	17.3					1.7		0.05
Agegnehu et al., 2015	test	FIELD	145	4.83333	> 3 ≤ 1 año	Wood	550	501-700	8.3		710	medium			Fine	dark reddish brown Ferralsol (30-100 cm profundidad)	yes	6.3	5.6	5.92	5.76	6.3	5.6	acid	5.92	5.76	acid	1:2.5 water	0.72		10		0.05	40	organic carbon	0.61		P	INICIAL	9.6
Agegnehu et al., 2015	test	FIELD	145	4.83333	> 3 ≤ 1 año	Wood	550	501-700	7.5		2000	high			Fine		yes	6.3	5.6	5.86	5.76	6.3	5.6	acid	5.86	5.76	acid	1:2.5 water	0.81		2.5			40	ND
Dicke et al., 2015	control	FIELD	365	12.1667	> 1 año ≤ 2 años										Coarse	Haplic Cambisol, (contained 71.2% sand, 22.2% silt and 6.6% clay)	yes	5.73	5.73	6.65	6.65	6.54011	6.54	acid	7.4049	7.4	neutral	1:1 CaCl2	1.53	45.538	0				total carbon	0.61685
Dicke et al., 2015	test	FIELD	365	12.1667	> 1 año ≤ 2 años	Residues	600	501-700	9.9		3100	high			Coarse		yes	5.73	5.73	6.5	6.65	6.54011	6.54	acid	7.2639	7.4	neutral	1:1 CaCl2	1.53	45.538	10.9				ND
Dicke et al., 2015	test	FIELD	365	12.1667	> 1 año ≤ 2 años	Wood	850	>700	9.3		1700	high			Coarse		yes	5.73	5.73	6.46	6.65	6.54011	6.54	acid	7.2263	7.4	neutral	1:1 CaCl2	1.53	45.538	18.8				ND
Fungo et al., 2014	control	POT	34	1.13333	≤ 3 meses											Humic Acrisol	no	6.2	6.2			6.99951	6.99951	neutral				1:20 water			0				ND			P, Mg, Ca, P, Zn	INICIAL	108700		820					14600
Fungo et al., 2014	test	POT	34	1.13333	≤ 3 meses	Residues	350	300-500	9.3								no	6.2	6.2			6.99951	6.99951	neutral				1:20 water			15				ND				INICIAL	108700		820					14600
Fungo et al., 2014	test	POT	34	1.13333	≤ 3 meses	Residues	350	300-500	9.3								no	6.2	6.2			6.99951	6.99951	neutral				1:20 water			15				ND				INICIAL	108700		820					14600
Fungo et al., 2014	test	POT	34	1.13333	≤ 3 meses	Residues	550	501-700	10								no	6.2	6.2			6.99951	6.99951	neutral				1:20 water			15				ND				INICIAL	108700		820					14600
Fungo et al., 2014	test	POT	34	1.13333	≤ 3 meses	Residues	550	501-700	10								no	6.2	6.2			6.99951	6.99951	neutral				1:20 water			15				ND				INICIAL	108700		820					14600
Fungo et al., 2014	test	POT	34	1.13333	≤ 3 meses	Wood	350	300-500	7.5								no	6.2	6.2			6.99951	6.99951	neutral				1:20 water			15				ND				INICIAL	108700		820					14600
Fungo et al., 2014	test	POT	34	1.13333	≤ 3 meses	Wood	350	300-500	7								no	6.2	6.2			6.99951	6.99951	neutral				1:20 water			15				ND				INICIAL	108700		820					14600
Fungo et al., 2014	test	POT	34	1.13333	≤ 3 meses	Wood	550	501-700	9.5								no	6.2	6.2			6.99951	6.99951	neutral				1:20 water			15				ND				INICIAL	108700		820					14600
Fungo et al., 2014	test	POT	34	1.13333	≤ 3 meses	Wood	550	501-700	10.2								no	6.2	6.2			6.99951	6.99951	neutral				1:20 water			15				ND				INICIAL	108700		820					14600
Harter et al., 2013a	control	POT	85	2.83333	≤ 3 meses										Coarse	loamy sand (calcaric leptosol). Sand 44.95%, Silt 35.37%, Clay 19.69%	yes	8.4	8.4			8.34343	8.34343	alcaline				1:5 water	1.21			0			organic carbon / total carbon	0.91
Harter et al., 2013a	test	POT	85	2.83333	≤ 3 meses	Grass	700	501-700	9.8		337	medium	303	high	Coarse		yes	8.4	8.4			8.34343	8.34343	alcaline				1:5 water	1.21			10			ND
Ji et al., 2019	control	POT	35	1.16667	≤ 3 meses										Fine	cultivation of green tea (TG). Silt 14.05%, Clay 55.79%, Sand 27.80%	yes	4.82	4.82	4.62	4.62	4.72727	4.73	acid	4.52525	4.53	acid	1:5 water	1.233	1.533		0			organic carbon	2.023
Ji et al., 2019	test	POT	35	1.16667	≤ 3 meses	Straw	450	300-500	10.9						Fine	cultivation of green tea (TG). Silt 14.05%, Clay 55.79%, Sand 27.80%	yes	4.82	4.82	5.29	4.62	4.72727	4.73	acid	5.20202	4.53	acid	1:5 water	1.233	1.533		4			organic carbon
Ji et al., 2019	test	POT	35	1.16667	≤ 3 meses	Straw	450	300-500	10.9						Fine	cultivation of green tea (TG). Silt 14.05%, Clay 55.79%, Sand 27.80%	yes	4.82	4.82	5.41	4.62	4.72727	4.73	acid	5.32323	4.53	acid	1:5 water	1.233	1.533		4			organic carbon
Ji et al., 2019	control	POT	35	1.16667	≤ 3 meses										Fine	film greenhouse vegetable cabbage (GV) Silt 17.73%, Clay 50.43%, Sand 31.05%	yes	7.39	7.39	7.37	7.37	7.32323	7.32	neutral	7.30303	7.3	neutral	1:5 water	1.254	1.502		0			organic carbon	1.12
Ji et al., 2019	test	POT	35	1.16667	≤ 3 meses	Straw	450	300-500	10.9						Fine	film greenhouse vegetable cabbage (GV) Silt 17.73%, Clay 50.43%, Sand 31.05%	yes	7.39	7.39	7.54	7.37	7.32323	7.32	neutral	7.47475	7.3	neutral	1:5 water	1.254	1.502		4			organic carbon
Ji et al., 2019	test	POT	35	1.16667	≤ 3 meses	Straw	450	300-500	10.9						Fine	film greenhouse vegetable cabbage (GV) Silt 17.73%, Clay 50.43%, Sand 31.05%	yes	7.39	7.39	7.51	7.37	7.32323	7.32	neutral	7.44444	7.3	neutral	1:5 water	1.254	1.502		4			organic carbon
Ji et al., 2019	control	POT	35	1.16667	≤ 3 meses										Fine	Jerusalem artichoke (JA) Silt 31.68%, Clay 56.55%, Sand 11.77%	yes	8.05	8.05	8.07	8.07	7.9899	7.99	alcaline	8.0101	8.01	alcaline	1:5 water	1.2	2.253		0			organic carbon	1.783
Ji et al., 2019	test	POT	35	1.16667	≤ 3 meses	Straw	450	300-500	10.9						Fine	Jerusalem artichoke (JA) Silt 31.68%, Clay 56.55%, Sand 11.77%	yes	8.05	8.05	8.43	8.07	7.9899	7.99	alcaline	8.37374	8.01	alcaline	1:5 water	1.2	2.253		4			organic carbon
Ji et al., 2019	test	POT	35	1.16667	≤ 3 meses	Straw	450	300-500	10.9						Fine	Jerusalem artichoke (JA) Silt 31.68%, Clay 56.55%, Sand 11.77%	yes	8.05	8.05	8.14	8.07	7.9899	7.99	alcaline	8.08081	8.01	alcaline	1:5 water	1.2	2.253		4			organic carbon
Kang et al., 2016	control	POT	60	2	≤ 3 meses										Coarse	50.3% sand, 41.1% silt, and 8.6% clay.	yes	6.45	6.45			6.37374	6.37	acid				1:5 water	1.32		0		160		organic matter	1.3804		Mg, Ca, K	INICIAL			183.72
Kang et al., 2016	test	POT	60	2	≤ 3 meses	Straw	400	300-500	7.72	7.5964					Coarse	50.3% sand, 41.1% silt, and 8.6% clay.	yes	6.45	6.45			6.37374	6.37	acid				1:5 water	1.23		0.0247097				ND							183.72
Kang et al., 2016	test	POT	60	2	≤ 3 meses	Straw	400	300-500	7.72	7.5964					Coarse	50.3% sand, 41.1% silt, and 8.6% clay.	yes	6.45	6.45			6.37374	6.37	acid				1:5 water	1.12		0.074129				ND							183.72
Kang et al., 2016	test	POT	60	2	≤ 3 meses	Straw	400	300-500	7.72	7.5964					Coarse	50.3% sand, 41.1% silt, and 8.6% clay.	yes	6.45	6.45			6.37374	6.37	acid				1:5 water	1.07		0.123548				ND							183.72
Karhu et al., 2011	control	FIELD	40	1.33333	≤ 3 meses										Medium	Silt loam	no	6.9	6.9			7.0869	7.09	neutral				ND	1.3		0				organic matter	1.81
Karhu et al., 2011	test	FIELD	40	1.33333	≤ 3 meses	Wood	400	300-500					3.6	low	Medium	Silt loam	no	6.9	6.9			7.0869	7.09	neutral				ND	1.3		9				ND
Lan et al., 2016	control	INCUBATION	60	2	≤ 3 meses										Medium	Ferrosol (Oxisol)	no	5.65	5.65	5.7	5.7	5.56566	5.57	acid	5.61616	5.62	acid	1:5 water	1	11.009		0	1.29	1260	organic carbon- total carbon	0.0427	0.0373
Lan et al., 2016	test	INCUBATION	60	2	≤ 3 meses	Wood	800	>700	3.4				109	medium	Medium	Ferrosol (Oxisol)	no	5.4	5.65	5.5	5.7	5.31313	5.57	acid	5.41414	5.62	acid	1:5 water	1	11.009		2.5	1.21	910	organic carbon- total carbon	0.0423	0.0392
Lan et al., 2016	test	INCUBATION	60	2	≤ 3 meses	Wood	700	501-700	8.2				322	high	Medium	Ferrosol (Oxisol)	no	5.8	5.65	6	5.7	5.71717	5.57	acid	5.91919	5.62	acid	1:5 water	1	11.009		2.5	1.22	1030	organic carbon- total carbon	0.0425	0.035
Lan et al., 2016	test	INCUBATION	60	2	≤ 3 meses	Wood	700	501-700	9.5				233	high	Medium	Ferrosol (Oxisol)	no	6.24	5.65	6.35	5.7	6.16162	5.57	acid	6.27273	5.62	acid	1:5 water	1	11.009		2.5	1.23	1080	organic carbon- total carbon	0.0475	0.03425
Lan et al., 2016	test	INCUBATION	60	2	≤ 3 meses	Wood	700	501-700	10.2				205	high	Medium	Ferrosol (Oxisol)	no	5.9	5.65	6	5.7	5.81818	5.57	acid	5.91919	5.62	acid	1:5 water	1	11.009		2.5	1.12	980	organic carbon- total carbon	0.0428	0.0345
Lan et al., 2016	test	INCUBATION	60	2	≤ 3 meses	Residues	550	501-700	7.4				94	medium	Medium	Ferrosol (Oxisol)	no	5.84	5.65	5.95	5.7	5.75758	5.57	acid	5.86869	5.62	acid	1:5 water	1	11.009		2.5	1.31	1190	organic carbon- total carbon	0.045	0.0365
Lan et al., 2016	test	INCUBATION	60	2	≤ 3 meses	Grass	450	300-500	10				271	high	Medium	Ferrosol (Oxisol)	no	6.08	5.65	6.15	5.7	6	5.57	acid	6.07071	5.62	acid	1:5 water	1	11.009		2.5	1.29	1080	organic carbon- total carbon	0.0468	0.034
Lan et al., 2016	test	INCUBATION	60	2	≤ 3 meses	Wood	700	501-700	8.9				382	high	Medium	Ferrosol (Oxisol)	no	5.92	5.65	6.1	5.7	5.83838	5.57	acid	6.0202	5.62	acid	1:5 water	1	11.009		2.5	1.06	900	organic carbon- total carbon	0.0402	0.0352
Lan et al., 2016	control	INCUBATION	60	2	≤ 3 meses										Coarse	Tenosol (Inceptisol)	no	5.8	5.8	5.95	5.95	5.71717	5.72	acid	5.86869	5.87	acid	1:5 water	1.4	10.739		0	0.25	205	organic carbon- total carbon	0.0032	0.004
Lan et al., 2016	test	INCUBATION	60	2	≤ 3 meses	Wood	800	>700	3.4				109	medium	Coarse	Tenosol (Inceptisol)	no	4.68	5.8	4.7	5.95	4.58586	5.72	acid	4.60606	5.87	acid	1:5 water	1.4	10.739		2.5	0.23	190	organic carbon- total carbon	0.004	0.0052
Lan et al., 2016	test	INCUBATION	60	2	≤ 3 meses	Wood	700	501-700	8.2				322	high	Coarse	Tenosol (Inceptisol)	no	6.95	5.8	6.8	5.95	6.87879	5.72	neutral	6.72727	5.87	neutral	1:5 water	1.4	10.739		2.5	0.248	238	organic carbon- total carbon	0.0049	0.0048
Lan et al., 2016	test	INCUBATION	60	2	≤ 3 meses	Wood	700	501-700	9.5				233	high	Coarse	Tenosol (Inceptisol)	no	7.9	5.8	7.8	5.95	7.83838	5.72	alcaline	7.73737	5.87	alcaline	1:5 water	1.4	10.739		2.5	0.345	355	organic carbon- total carbon	0.0086	0.0083
Lan et al., 2016	test	INCUBATION	60	2	≤ 3 meses	Wood	700	501-700	10.2				205	high	Coarse	Tenosol (Inceptisol)	no	6.75	5.8	7	5.95	6.67677	5.72	neutral	6.92929	5.87	neutral	1:5 water	1.4	10.739		2.5	0.21	135	organic carbon- total carbon	0.0034	0.0058
Lan et al., 2016	test	INCUBATION	60	2	≤ 3 meses	Residues	550	501-700	7.4				94	medium	Coarse	Tenosol (Inceptisol)	no	6.45	5.8	6.4	5.95	6.37374	5.72	acid	6.32323	5.87	acid	1:5 water	1.4	10.739		2.5	0.34	335	organic carbon- total carbon	0.0049	0.005
Lan et al., 2016	test	INCUBATION	60	2	≤ 3 meses	Grass	450	300-500	10				271	high	Coarse	Tenosol (Inceptisol)	no	7.6	5.8	7.45	5.95	7.53535	5.72	neutral	7.38384	5.87	neutral	1:5 water	1.4	10.739		2.5	0.375	350	organic carbon- total carbon	0.008	0.0052
Lan et al., 2016	test	INCUBATION	60	2	≤ 3 meses	Wood	700	501-700	8.9				382	high	Coarse	Tenosol (Inceptisol)	no	7.12	5.8	6.9	5.95	7.05051	5.72	neutral	6.82828	5.87	neutral	1:5 water	1.4	10.739		2.5	0.154	115	organic carbon- total carbon	0.0041	0.0061
Lentz et al., 2014	control	FIELD	1095	36.5	> 2 años										Medium	200 g/kg clay, 560 g/kg silt	yes	7.7	7.7			7.8637	7.86	alcaline				1:1 water					0.4		organic carbon	1.2		P, Ca, K	INICIAL	4200		26800
Lentz et al., 2014	test	FIELD	1095	36.5	> 2 años	Wood	500	300-500	6.8		0.7	low	0.75	low	Medium	201 g/kg clay, 560 g/kg silt	yes	7.7	7.7			7.8637	7.86	alcaline				1:1 water			24.69				ND					4200		26800
Lentz et al., 2014	test	FIELD	1095	36.5	> 2 años	Wood	500	300-500	6.8		0.7	low	0.75	low	Medium	202 g/kg clay, 560 g/kg silt	yes	7.7	7.7			7.8637	7.86	alcaline				1:1 water			24.69				ND					4200		26800
Liu et al., 2014a	control	FIELD	66	2.2	≤ 3 meses										Medium	typical calcareous soil	yes	8.38	8.38	8.28	8.28	8.38	8.38	alcaline	8.28	8.28	alcaline	1:2.5 water	1.46		0				organic carbon	0.987	2.16	Available potassium, Available phosphorus	FINAL
Liu et al., 2014a	test	FIELD	66	2.2	≤ 3 meses	Straw	450	300-500	10.4						Medium		yes	8.38	8.38	8.38	8.28	8.38	8.38	alcaline	8.38	8.28	alcaline	1:2.5 water	1.46		20				organic carbon		#REF!	Available potassium, Available phosphorus	FINAL
Liu et al., 2014a	test	FIELD	66	2.2	≤ 3 meses	Straw	450	300-500	10.4						Medium		yes	8.38	8.38	8.23	8.28	8.38	8.38	alcaline	8.23	8.28	alcaline	1:2.5 water	1.46		40				organic carbon		#REF!	Available potassium, Available phosphorus	FINAL
Liu et al., 2014a	control	FIELD	44	1.46667	≤ 3 meses										Medium	typical calcareous soil	yes	8.38	8.38			8.38	8.38	alcaline				1:2.5 water	1.46		0				organic carbon	0.987	#REF!	Available potassium, Available phosphorus	FINAL
Liu et al., 2014a	test	FIELD	44	1.46667	≤ 3 meses	Straw	450	300-500	10.4						Medium		yes	8.38	8.38			8.38	8.38	alcaline				1:2.5 water	1.46		20				organic carbon		#REF!	Available potassium, Available phosphorus	FINAL
Liu et al., 2014a	test	FIELD	44	1.46667	≤ 3 meses	Straw	450	300-500	10.4						Medium		yes	8.38	8.38			8.38	8.38	alcaline				1:2.5 water	1.46		40				organic carbon		#REF!	Available potassium, Available phosphorus	FINAL
Liu et al., 2014a	control	FIELD	89	2.96667	≤ 3 meses										Medium	typical calcareous soil	yes	8.38	8.38	8.25	8.25	8.38	8.38	alcaline	8.25	8.25	alcaline	1:2.5 water	1.46		0				organic carbon	0.987	#REF!	Available potassium, Available phosphorus	FINAL
Liu et al., 2014a	test	FIELD	89	2.96667	≤ 3 meses	Straw	450	300-500	10.4						Medium		yes	8.38	8.38	8.11	8.25	8.38	8.38	alcaline	8.11	8.25	alcaline	1:2.5 water	1.46		20				organic carbon		#REF!	Available potassium, Available phosphorus	FINAL
Liu et al., 2014a	test	FIELD	89	2.96667	≤ 3 meses	Straw	450	300-500	10.4						Medium		yes	8.38	8.38	8.23	8.25	8.38	8.38	alcaline	8.23	8.25	alcaline	1:2.5 water	1.46		40				organic carbon		#REF!	Available potassium, Available phosphorus	FINAL
Liu et al., 2015b	control	INCUBATION	252	8.4	> 3 meses ≤ 1 año										Coarse	dry land soil	no	7.17	7.17	7.18	7.18	7.34907	7.35	neutral	7.35878	7.36	neutral	1:1 water				0			organic carbon	1.736	1.289
Liu et al., 2015b	test	INCUBATION	252	8.4	> 3 meses ≤ 1 año	Residues	600	501-700	8.31			0.98	low		Coarse	dry land soil	no	7.28	7.17	7.4	7.18	7.45588	7.35	neutral	7.5724	7.36	neutral	1:1 water				0.5			organic carbon		1.384
Liu et al., 2015b	test	INCUBATION	252	8.4	> 3 meses ≤ 1 año	Residues	600	501-700	8.31			0.98	low		Coarse	dry land soil	no	7.33	7.17	7.43	7.18	7.50443	7.35	neutral	7.60153	7.36	alcaline	1:1 water				1			organic carbon		1.509
Liu et al., 2015b	test	INCUBATION	252	8.4	> 3 meses ≤ 1 año	Residues	600	501-700	8.31			0.98	low		Coarse	dry land soil	no	7.32	7.17	7.48	7.18	7.49472	7.35	neutral	7.65008	7.36	alcaline	1:1 water				2			organic carbon		1.527
Liu et al., 2015b	test	INCUBATION	252	8.4	> 3 meses ≤ 1 año	Residues	700	501-700	8.52			28.42	low		Coarse	dry land soil	no	7.35	7.17	7.6	7.18	7.52385	7.35	neutral	7.7666	7.36	alcaline	1:1 water				0.5			organic carbon		1.485
Liu et al., 2015b	test	INCUBATION	252	8.4	> 3 meses ≤ 1 año	Residues	700	501-700	8.52			28.42	low		Coarse	dry land soil	no	7.38	7.17	7.74	7.18	7.55298	7.35	neutral	7.90254	7.36	alcaline	1:1 water				1			organic carbon		1.539
Liu et al., 2015b	test	INCUBATION	252	8.4	> 3 meses ≤ 1 año	Residues	700	501-700	8.52			28.42	low		Coarse	dry land soil	no	7.34	7.17	7.86	7.18	7.51414	7.35	neutral	8.01906	7.36	alcaline	1:1 water				2			organic carbon		1.652
Liu et al., 2015b	test	INCUBATION	252	8.4	> 3 meses ≤ 1 año	Residues	800	>700	8.64			111.93	medium		Coarse	dry land soil	no	7.2	7.17	7.73	7.18	7.3782	7.35	neutral	7.89283	7.36	alcaline	1:1 water				0.5			organic carbon		1.519
Liu et al., 2015b	test	INCUBATION	252	8.4	> 3 meses ≤ 1 año	Residues	800	>700	8.64			111.93	medium		Coarse	dry land soil	no	7.5	7.17	7.88	7.18	7.6695	7.35	alcaline	8.03848	7.36	alcaline	1:1 water				1			organic carbon		1.639
Liu et al., 2015b	test	INCUBATION	252	8.4	> 3 meses ≤ 1 año	Residues	800	>700	8.64			111.93	medium		Coarse	dry land soil	no	7.45	7.17	7.99	7.18	7.62095	7.35	alcaline	8.14529	7.36	alcaline	1:1 water				2			organic carbon		1.663
Martin et al., 2015	control	INCUBATION	224	7.46667	> 3 meses ≤ 1 año										Coarse	sandy loam soil	no	7.35	7.35	7.69	7.69	7.35	7.35	neutral	7.69	7.69	alcaline	1:2.5 water	1.49	11.585		0		113.95	total carbon	2.146	2.028
Martin et al., 2015	test	INCUBATION	224	7.46667	> 3 meses ≤ 1 año	Wood	450	300-500	9						Coarse	sandy loam soil	no	7.35	7.35	7.37	7.69	7.35	7.35	neutral	7.37	7.69	neutral	1:2.5 water	1.49	11.585		1		165.31	total carbon		2.9575
Martin et al., 2015	test	INCUBATION	224	7.46667	> 3 meses ≤ 1 año	Wood	450	300-500	9						Coarse	sandy loam soil	no	7.35	7.35	7.56	7.69	7.35	7.35	neutral	7.56	7.69	neutral	1:2.5 water	1.49	11.585		3		164.15	total carbon		3.718
Martin et al., 2015	control	INCUBATION	224	7.46667	> 3 meses ≤ 1 año										Coarse	sandy loam soil	no	7.35	7.35	6.67	6.67	7.35	7.35	neutral	6.67	6.67	neutral	1:2.5 water	1.49	11.585		0		1610	ND
Martin et al., 2015	test	INCUBATION	224	7.46667	> 3 meses ≤ 1 año	Wood	450	300-500	9						Coarse	sandy loam soil	no	7.35	7.35	6.78	6.67	7.35	7.35	neutral	6.78	6.67	neutral	1:2.5 water	1.49	11.585		1		1483.68	ND
Martin et al., 2015	test	INCUBATION	224	7.46667	> 3 meses ≤ 1 año	Wood	450	300-500	9						Coarse	sandy loam soil	no	7.35	7.35	6.76	6.67	7.35	7.35	neutral	6.76	6.67	neutral	1:2.5 water	1.49	11.585		3		1409.23	ND
Martin et al., 2015	control	INCUBATION	224	7.46667	> 3 meses ≤ 1 año										Coarse	sandy loam soil	no	7.35	7.35	7.24	7.24	7.35	7.35	neutral	7.24	7.24	neutral	1:2.5 water	1.49	11.585		0		1647.83	ND
Martin et al., 2015	test	INCUBATION	224	7.46667	> 3 meses ≤ 1 año	Wood	450	300-500	9						Coarse	sandy loam soil	no	7.35	7.35	7.3	7.24	7.35	7.35	neutral	7.3	7.24	neutral	1:2.5 water	1.49	11.585		1		1678.04	ND
Martin et al., 2015	test	INCUBATION	224	7.46667	> 3 meses ≤ 1 año	Wood	450	300-500	9						Coarse	sandy loam soil	no	7.35	7.35	7.4	7.24	7.35	7.35	neutral	7.4	7.24	neutral	1:2.5 water	1.49	11.585		3		1561.4	ND
Martin et al., 2015	control	INCUBATION	224	7.46667	> 3 meses ≤ 1 año										Coarse	sandy loam soil	no	7.35	7.35	7	7	7.35	7.35	neutral	7	7	neutral	1:2.5 water	1.49	11.585		0		1369.4	ND
Martin et al., 2015	test	INCUBATION	224	7.46667	> 3 meses ≤ 1 año	Wood	450	300-500	9						Coarse	sandy loam soil	no	7.35	7.35	6.63	7	7.35	7.35	neutral	6.63	7	neutral	1:2.5 water	1.49	11.585		1		1820.03	ND
Martin et al., 2015	test	INCUBATION	224	7.46667	> 3 meses ≤ 1 año	Wood	450	300-500	9						Coarse	sandy loam soil	no	7.35	7.35	6.53	7	7.35	7.35	neutral	6.53	7	acid	1:2.5 water	1.49	11.585		3		2207.14	ND
Maucieri et al., 2017	control	INCUBATION	30	1	≤ 3 meses										Fine	clay-loam vertisol soil	no	7.25	7.25	6.93	6.93	7.25	7.25	neutral	6.93	6.93	neutral	1:2.5 water	1.33	4.969		0	185.87	697.1	organic carbon / organic matter	0.0106	0.01917
Maucieri et al., 2017	test	INCUBATION	30	1	≤ 3 meses	Wood	500	300-500	9.6	9.6	3400	high			Fine	clay-loam vertisol soil	no	7.25	7.25	7.04	6.93	7.25	7.25	neutral	7.04	7.04	neutral	1:2.5 water	1.33	4.969		5		967.9	ND		0.01903
Qin et al., 2016	control	FIELD	365	12.1667	> 1 año ≤ 2 años										Coarse	latosolic red soil	yes	7	7			6.92929	6.92929	neutral				1:5 water	1.467	13.031	0				ND	2.67			INICIAL	860		17800
Qin et al., 2016	test	FIELD	365	12.1667	> 1 año ≤ 2 años	Straw	350-500	350-500	8.1	8.1	12.5	Low			Coarse	latosolic red soil	yes	7	7			6.92929	6.92929	neutral				1:5 water	1.467	13.031	5				ND					860		17800
Qin et al., 2016	test	FIELD	365	12.1667	> 1 año ≤ 2 años	Straw	350-500	350-500	8.1	8.1	12.5	Low			Coarse	latosolic red soil	yes	7	7			6.92929	6.92929	neutral				1:5 water	1.467	13.031	10				ND					860		17800
Qin et al., 2016	test	FIELD	365	12.1667	> 1 año ≤ 2 años	Straw	350-500	350-500	8.1	8.1	12.5	Low			Coarse	latosolic red soil	yes	7	7			6.92929	6.92929	neutral				1:5 water	1.467	13.031	20				ND					860		17800
Qin et al., 2016	control	FIELD	365	12.1667	> 1 año ≤ 2 años										Coarse	latosolic red soil	yes	7	7			6.92929	6.92929	neutral				1:5 water	1.467	13.031	0				ND
Qin et al., 2016	test	FIELD	365	12.1667	> 1 año ≤ 2 años	Straw	350-500	350-500	8.1	8.1	12.5	Low			Coarse	latosolic red soil	yes	7	7			6.92929	6.92929	neutral				1:5 water	1.467	13.031	5				ND
Qin et al., 2016	test	FIELD	365	12.1667	> 1 año ≤ 2 años	Straw	350-500	350-500	8.1	8.1	12.5	Low			Coarse	latosolic red soil	yes	7	7			6.92929	6.92929	neutral				1:5 water	1.467	13.031	10				ND
Qin et al., 2016	test	FIELD	365	12.1667	> 1 año ≤ 2 años	Straw	350-500	350-500	8.1	8.1	12.5	Low			Coarse	latosolic red soil	yes	7	7			6.92929	6.92929	neutral				1:5 water	1.467	13.031	20				ND
Qin et al., 2016	control	FIELD	730	24.3333	> 2 años										Coarse	latosolic red soil	yes	7	7			6.92929	6.92929	neutral				1:5 water	1.467	13.031	0				ND
Qin et al., 2016	test	FIELD	730	24.3333	> 2 años	Straw	350-500	350-500	8.1	8.1	12.5	Low			Coarse	latosolic red soil	yes	7	7			6.92929	6.92929	neutral				1:5 water	1.467	13.031	5				ND
Qin et al., 2016	test	FIELD	730	24.3333	> 2 años	Straw	350-500	350-500	8.1	8.1	12.5	Low			Coarse	latosolic red soil	yes	7	7			6.92929	6.92929	neutral				1:5 water	1.467	13.031	10				ND
Qin et al., 2016	test	FIELD	730	24.3333	> 2 años	Straw	350-500	350-500	8.1	8.1	12.5	Low			Coarse	latosolic red soil	yes	7	7			6.92929	6.92929	neutral				1:5 water	1.467	13.031	20				ND
Qin et al., 2016	control	FIELD	730	24.3333	> 2 años										Coarse	latosolic red soil	yes	7	7			6.92929	6.92929	neutral				1:5 water	1.467	13.031	0				ND
Qin et al., 2016	test	FIELD	730	24.3333	> 2 años	Straw	350-500	350-500	8.1	8.1	12.5	Low			Coarse	latosolic red soil	yes	7	7			6.92929	6.92929	neutral				1:5 water	1.467	13.031	5				ND
Qin et al., 2016	test	FIELD	730	24.3333	> 2 años	Straw	350-500	350-500	8.1	8.1	12.5	Low			Coarse	latosolic red soil	yes	7	7			6.92929	6.92929	neutral				1:5 water	1.467	13.031	10				ND
Qin et al., 2016	test	FIELD	730	24.3333	> 2 años	Straw	350-500	350-500	8.1	8.1	12.5	Low			Coarse	latosolic red soil	yes	7	7			6.92929	6.92929	neutral				1:5 water	1.467	13.031	20				ND
Qin et al., 2016	control	FIELD	1095	36.5	> 2 años										Coarse	latosolic red soil	yes	7	7			6.92929	6.92929	neutral				1:5 water	1.467	13.031	0				ND
Qin et al., 2016	test	FIELD	1095	36.5	> 2 años	Straw	350-500	350-500	8.1	8.1	12.5	Low			Coarse	latosolic red soil	yes	7	7			6.92929	6.92929	neutral				1:5 water	1.467	13.031	5				ND
Qin et al., 2016	test	FIELD	1095	36.5	> 2 años	Straw	350-500	350-500	8.1	8.1	12.5	Low			Coarse	latosolic red soil	yes	7	7			6.92929	6.92929	neutral				1:5 water	1.467	13.031	10				ND
Qin et al., 2016	test	FIELD	1095	36.5	> 2 años	Straw	350-500	350-500	8.1	8.1	12.5	Low			Coarse	latosolic red soil	yes	7	7			6.92929	6.92929	neutral				1:5 water	1.467	13.031	20				ND
Qin et al., 2016	control	FIELD	1095	36.5	> 2 años										Coarse	latosolic red soil	yes	7	7			6.92929	6.92929	neutral				1:5 water	1.467	13.031	0				ND
Qin et al., 2016	test	FIELD	1095	36.5	> 2 años	Straw	350-500	350-500	8.1	8.1	12.5	Low			Coarse	latosolic red soil	yes	7	7			6.92929	6.92929	neutral				1:5 water	1.467	13.031	5				ND
Qin et al., 2016	test	FIELD	1095	36.5	> 2 años	Straw	350-500	350-500	8.1	8.1	12.5	Low			Coarse	latosolic red soil	yes	7	7			6.92929	6.92929	neutral				1:5 water	1.467	13.031	10				ND
Qin et al., 2016	test	FIELD	1095	36.5	> 2 años	Straw	350-500	350-500	8.1	8.1	12.5	Low			Coarse	latosolic red soil	yes	7	7			6.92929	6.92929	neutral				1:5 water	1.467	13.031	20				ND
Qin et al., 2016	control	FIELD	1460	48.6667	> 2 años										Coarse	latosolic red soil	yes	7	7			6.92929	6.92929	neutral				1:5 water	1.467	13.031	0				ND
Qin et al., 2016	test	FIELD	1460	48.6667	> 2 años	Straw	350-500	350-500	8.1	8.1	12.5	Low			Coarse	latosolic red soil	yes	7	7			6.92929	6.92929	neutral				1:5 water	1.467	13.031	5				ND
Qin et al., 2016	test	FIELD	1460	48.6667	> 2 años	Straw	350-500	350-500	8.1	8.1	12.5	Low			Coarse	latosolic red soil	yes	7	7			6.92929	6.92929	neutral				1:5 water	1.467	13.031	10				ND
Qin et al., 2016	test	FIELD	1460	48.6667	> 2 años	Straw	350-500	350-500	8.1	8.1	12.5	Low			Coarse	latosolic red soil	yes	7	7			6.92929	6.92929	neutral				1:5 water	1.467	13.031	20				ND
Qin et al., 2016	control	FIELD	1460	48.6667	> 2 años										Coarse	latosolic red soil	yes	7	7			6.92929	6.92929	neutral				1:5 water	1.467	13.031	0				ND
Qin et al., 2016	test	FIELD	1460	48.6667	> 2 años	Straw	350-500	350-500	8.1	8.1	12.5	Low			Coarse	latosolic red soil	yes	7	7			6.92929	6.92929	neutral				1:5 water	1.467	13.031	5				ND
Qin et al., 2016	test	FIELD	1460	48.6667	> 2 años	Straw	350-500	350-500	8.1	8.1	12.5	Low			Coarse	latosolic red soil	yes	7	7			6.92929	6.92929	neutral				1:5 water	1.467	13.031	10				ND
Qin et al., 2016	test	FIELD	1460	48.6667	> 2 años	Straw	350-500	350-500	8.1	8.1	12.5	Low			Coarse	latosolic red soil	yes	7	7			6.92929	6.92929	neutral				1:5 water	1.467	13.031	20				ND
Senbayram et al., 2018	control	INCUBATION	56	1.86667	≤ 3 meses										Fine	alkaline clay soil	yes	7.9	7.9	8	8	8.0579	8.06	alcaline	8.155	8.16	alcaline	ND	1.213	1.94	0				total carbon	2.028
Senbayram et al., 2018	test	INCUBATION	56	1.86667	≤ 3 meses	Wood	280	<300	7.35		1060	high			Fine	alkaline clay soil	yes	7.9	7.9	7.9	8	8.0579	8.06	alcaline	8.0579	8.16	alcaline	ND	1.213	1.94	4				ND
Senbayram et al., 2018	test	INCUBATION	56	1.86667	≤ 3 meses	Residues	280	<300	9.24		1060	high			Fine	alkaline clay soil	yes	7.9	7.9	7.8	8	8.0579	8.06	alcaline	7.9608	8.16	alcaline	ND	1.213	1.94	4				ND
Senbayram et al., 2018	test	INCUBATION	56	1.86667	≤ 3 meses	Residues	280	<300	8.46		880	medium			Fine	alkaline clay soil	yes	7.9	7.9	7.85	8	8.0579	8.06	alcaline	8.00935	8.16	alcaline	ND	1.213	1.94	4				ND
Senbayram et al., 2018	test	INCUBATION	56	1.86667	≤ 3 meses	Residues	280	<300	9.72		4540	high			Fine	alkaline clay soil	yes	7.9	7.9	7.95	8	8.0579	8.06	alcaline	8.10645	8.16	alcaline	ND	1.213	1.94	4				ND
Senbayram et al., 2018	control	INCUBATION	66	2.2	≤ 3 meses										Coarse	acidic sandy soil	yes	5.3	5.3	5.2	5.2	5.5333	5.53	acid	5.4362	5.44	acid	ND	1.743	84.258	0				total carbon
Senbayram et al., 2018	test	INCUBATION	66	2.2	≤ 3 meses	Wood	280	<300	7.35		1060	high			Coarse	acidic sandy soil	yes	5.3	5.3	5	5.2	5.5333	5.53	acid	5.242	5.44	acid	ND	1.743	84.258	4				ND	1.2675
Senbayram et al., 2018	test	INCUBATION	66	2.2	≤ 3 meses	Residues	280	<300	9.24		1060	high			Coarse	acidic sandy soil	yes	5.3	5.3	5.5	5.2	5.5333	5.53	acid	5.7275	5.44	acid	ND	1.743	84.258	4				ND
Senbayram et al., 2018	test	INCUBATION	66	2.2	≤ 3 meses	Residues	280	<300	8.46		880	medium			Coarse	acidic sandy soil	yes	5.3	5.3	5.4	5.2	5.5333	5.53	acid	5.6304	5.44	acid	ND	1.743	84.258	4				ND
Senbayram et al., 2018	test	INCUBATION	66	2.2	≤ 3 meses	Residues	280	<300	9.72		4540	high			Coarse	acidic sandy soil	yes	5.3	5.3	6.1	5.2	5.5333	5.53	acid	6.3101	5.44	acid	ND	1.743	84.258	4				ND
Sial et al., 2018	control	INCUBATION	90	3	≤ 3 meses										Fine	Silty clay loam	no	8.2	8.2	8.22	8.22	8.2	8.2	alcaline	8.22	8.22	alcaline	1:2.5 water	1.292	4.544		0	181		organic carbon	0.889	0.911	P/Available phosphorus, K	AMBAS	1540		34650
Sial et al., 2018	test	INCUBATION	90	3	≤ 3 meses	Residues	350	300-500	10.88	11.1356	2052	high			Fine	Silty clay loam	no	8.2	8.2	8.32	8.22	8.2	8.2	alcaline	8.32	8.22	alcaline	1:2.5 water	1.292	4.544		1			organic carbon		1.653	K, Available phosphorus	FINAL	1540		34650
Sial et al., 2018	test	INCUBATION	90	3	≤ 3 meses	Residues	350	300-500	10.88	11.1356	2052	high			Fine	Silty clay loam	no	8.2	8.2	8.67	8.22	8.2	8.2	alcaline	8.67	8.22	alcaline	1:2.5 water	1.292	4.544		2			organic carbon		2.199	K, Available phosphorus	FINAL	1540		34650
Suddick & Six, 2013	control	FIELD	365	12.1667	> 1 año ≤ 2 años										Coarse	Silt 29%; Clay 22%; Sand 49%	yes	7.8	7.8	8.3	8.3	7.9608	7.96	alcaline	8.4463	8.45	alcaline	1:1 water	1.4	6.372	0				total carbon	1.352	1.19145	K, Cu, Zn, Fe	FINAL			970			53		84.8
Suddick & Six, 2013	test	FIELD	365	12.1667	> 1 año ≤ 2 años	Residues	900	>700	9.7	9.7			221.7	high	Coarse	Silt 29%; Clay 22%; Sand 49%	yes	7.8	7.8	8.3	8.3	7.9608	7.96	alcaline	8.4463	8.45	alcaline	1:1 water	1.4	6.372	5				total carbon		1.4534	K, Cu, Zn, Fe	FINAL			970			53		84.8
Suddick & Six, 2013	test	FIELD	365	12.1667	> 1 año ≤ 2 años	Residues	900	>700	9.7	9.7			221.7	high	Coarse	Silt 29%; Clay 22%; Sand 49%	yes	7.8	7.8	8.3	8.3	7.9608	7.96	alcaline	8.4463	8.45	alcaline	1:1 water	1.4	6.372	2.5				total carbon		1.2844	K, Cu, Zn, Fe	FINAL			970			53		84.8
Wang et al., 2020	control	INCUBATION	31	1.03333	≤ 3 meses										Coarse	Sandy Loam	yes	5.2	5.2			5.2	5.2	acid				1:2.5 water	1.429	5.648		0			ND	0.00041
Wang et al., 2020	test	INCUBATION	31	1.03333	≤ 3 meses	Straw	500	300-500	9.4	9.478					Coarse	Sandy Loam	yes	5.2	5.2			5.2	5.2	acid				1:2.5 water	1.429	5.648		0.5			ND
Wang et al., 2020	test	INCUBATION	31	1.03333	≤ 3 meses	Straw	500	300-500	9.4	9.478					Coarse	Sandy Loam	yes	5.2	5.2			5.2	5.2	acid				1:2.5 water	1.429	5.648		1			ND
Wang et al., 2020	test	INCUBATION	31	1.03333	≤ 3 meses	Straw	500	300-500	9.4	9.478					Coarse	Sandy Loam	yes	5.2	5.2			5.2	5.2	acid				1:2.5 water	1.429	5.648		2			ND
Wang et al., 2020	control	INCUBATION	31	1.03333	≤ 3 meses										Coarse	Sandy Loam	yes	5.2	5.2			5.2	5.2	acid				1:2.5 water	1.429	5.648		0			ND
Wang et al., 2020	test	INCUBATION	31	1.03333	≤ 3 meses	Straw	500	300-500	9.4	9.478					Coarse	Sandy Loam	yes	5.2	5.2			5.2	5.2	acid				1:2.5 water	1.429	5.648		0.5			ND
Wang et al., 2020	test	INCUBATION	31	1.03333	≤ 3 meses	Straw	500	300-500	9.4	9.478					Coarse	Sandy Loam	yes	5.2	5.2			5.2	5.2	acid				1:2.5 water	1.429	5.648		1			ND
Wang et al., 2020	test	INCUBATION	31	1.03333	≤ 3 meses	Straw	500	300-500	9.4	9.478					Coarse	Sandy Loam	yes	5.2	5.2			5.2	5.2	acid				1:2.5 water	1.429	5.648		2			ND
Wang et al., 2020	control	INCUBATION	31	1.03333	≤ 3 meses										Coarse	Sandy Loam	yes	5.2	5.2			5.2	5.2	acid				1:2.5 water	1.429	5.648		0			ND
Wang et al., 2020	test	INCUBATION	31	1.03333	≤ 3 meses	Straw	500	300-500	9.4	9.478					Coarse	Sandy Loam	yes	5.2	5.2			5.2	5.2	acid				1:2.5 water	1.429	5.648		0.5			ND
Wang et al., 2020	test	INCUBATION	31	1.03333	≤ 3 meses	Straw	500	300-500	9.4	9.478					Coarse	Sandy Loam	yes	5.2	5.2			5.2	5.2	acid				1:2.5 water	1.429	5.648		1			ND
Wang et al., 2020	test	INCUBATION	31	1.03333	≤ 3 meses	Straw	500	300-500	9.4	9.478					Coarse	Sandy Loam	yes	5.2	5.2			5.2	5.2	acid				1:2.5 water	1.429	5.648		2			ND
Wang et al., 2020	control	INCUBATION	31	1.03333	≤ 3 meses										Coarse	Sandy Loam	yes	5.2	5.2			5.2	5.2	acid				1:2.5 water	1.429	5.648		0			ND
Wang et al., 2020	test	INCUBATION	31	1.03333	≤ 3 meses	Straw	500	300-500	9.4	9.478					Coarse	Sandy Loam	yes	5.2	5.2			5.2	5.2	acid				1:2.5 water	1.429	5.648		0.5			ND
Wang et al., 2020	test	INCUBATION	31	1.03333	≤ 3 meses	Straw	500	300-500	9.4	9.478					Coarse	Sandy Loam	yes	5.2	5.2			5.2	5.2	acid				1:2.5 water	1.429	5.648		1			ND
Wang et al., 2020	test	INCUBATION	31	1.03333	≤ 3 meses	Straw	500	300-500	9.4	9.478					Coarse	Sandy Loam	yes	5.2	5.2			5.2	5.2	acid				1:2.5 water	1.429	5.648		2			ND
Wang et al., 2017	control	INCUBATION	14	0.466667	≤ 3 meses										Fine	Paddy Soil	no	5.9	5.9	6.5	6.5	6.70821	6.71	neutral	7.29081	7.29	neutral	1:10 water				0			organic carbon	0.95485
Wang et al., 2017	test	INCUBATION	14	0.466667	≤ 3 meses	Straw	500	300-500	9.4	9.478					Fine	Paddy Soil	no	5.9	5.9	7	6.5	6.70821	6.71	neutral	7.77631	7.29	alcaline	1:10 water				3			organic carbon
Wang et al., 2017	test	INCUBATION	14	0.466667	≤ 3 meses	Straw	500	300-500	9.4	9.478					Fine	Paddy Soil	no	5.9	5.9	7.5	6.5	6.70821	6.71	neutral	8.26181	7.29	alcaline	1:10 water				3			organic carbon
Wang et al., 2017	test	INCUBATION	14	0.466667	≤ 3 meses	Straw	500	300-500	9.4	9.478					Fine	Paddy Soil	no	5.9	5.9	7.7	6.5	6.70821	6.71	neutral	8.45601	7.29	alcaline	1:10 water				3			organic carbon
Yang et al., 2020	control	INCUBATION	30	1	≤ 3 meses										Fine	paddy soil	yes	6.42	6.42	6.9	6.9	6.42	6.42	acid	6.9	6.9	neutral	1:2.5 water				0			organic carbon	0.001744						109.4
Yang et al., 2020	test	INCUBATION	30	1	≤ 3 meses	Straw	500	300-500	10.17	10.3404			301.82	high	Fine	paddy soil	yes	6.42	6.42	7.25	6.9	6.42	6.42	acid	7.25	6.9	neutral	1:2.5 water				1			ND							109.4
Yang et al., 2020	test	INCUBATION	30	1	≤ 3 meses	Straw	500	300-500	10.17	10.3404			301.82	high	Fine	paddy soil	yes	6.42	6.42	7.45	6.9	6.42	6.42	acid	7.45	6.9	neutral	1:2.5 water				5			ND							109.4
Yang et al., 2020	test	INCUBATION	30	1	≤ 3 meses	Manure	500	300-500	9.98	10.1276			187.54	medium	Fine	paddy soil	yes	6.42	6.42	7.35	6.9	6.42	6.42	acid	7.35	6.9	neutral	1:2.5 water				1			ND							109.4
Yang et al., 2020	test	INCUBATION	30	1	≤ 3 meses	Manure	500	300-500	9.98	10.1276			187.54	medium	Fine	paddy soil	yes	6.42	6.42	8.1	6.9	6.42	6.42	acid	8.1	6.9	alcaline	1:2.5 water				5			ND							109.4
Yang et al., 2020	control	INCUBATION	30	1	≤ 3 meses										Fine	paddy soil	yes	6.42	6.42	6.8	6.8	6.42	6.42	acid	6.8	6.8	neutral	1:2.5 water				0			ND
Yang et al., 2020	test	INCUBATION	30	1	≤ 3 meses	Straw	500	300-500	10.17	10.3404			301.82	high	Fine	paddy soil	yes	6.42	6.42	7.14	6.8	6.42	6.42	acid	7.14	6.8	neutral	1:2.5 water				1			ND
Yang et al., 2020	test	INCUBATION	30	1	≤ 3 meses	Straw	500	300-500	10.17	10.3404			301.82	high	Fine	paddy soil	yes	6.42	6.42	7.18	6.8	6.42	6.42	acid	7.18	6.8	neutral	1:2.5 water				5			ND
Yang et al., 2020	test	INCUBATION	30	1	≤ 3 meses	Manure	500	300-500	9.98	10.1276			187.54	medium	Fine	paddy soil	yes	6.42	6.42	7.4	6.8	6.42	6.42	acid	7.4	6.8	neutral	1:2.5 water				1			ND
Yang et al., 2020	test	INCUBATION	30	1	≤ 3 meses	Manure	500	300-500	9.98	10.1276			187.54	medium	Fine	paddy soil	yes	6.42	6.42	7.51	6.8	6.42	6.42	acid	7.51	6.8	neutral	1:2.5 water				5			ND
Yang et al., 2020	control	INCUBATION	30	1	≤ 3 meses										Fine	paddy soil	yes	6.42	6.42	6.5	6.5	6.42	6.42	acid	6.5	6.5	acid	1:2.5 water				0			ND
Yang et al., 2020	test	INCUBATION	30	1	≤ 3 meses	Straw	500	300-500	10.17	10.3404			301.82	high	Fine	paddy soil	yes	6.42	6.42	7.13	6.5	6.42	6.42	acid	7.13	6.5	neutral	1:2.5 water				1			ND
Yang et al., 2020	test	INCUBATION	30	1	≤ 3 meses	Straw	500	300-500	10.17	10.3404			301.82	high	Fine	paddy soil	yes	6.42	6.42	7.25	6.5	6.42	6.42	acid	7.25	6.5	neutral	1:2.5 water				5			ND
Yang et al., 2020	test	INCUBATION	30	1	≤ 3 meses	Manure	500	300-500	9.98	10.1276			187.54	medium	Fine	paddy soil	yes	6.42	6.42	7.12	6.5	6.42	6.42	acid	7.12	6.5	neutral	1:2.5 water				1			ND
Yang et al., 2020	test	INCUBATION	30	1	≤ 3 meses	Manure	500	300-500	9.98	10.1276			187.54	medium	Fine	paddy soil	yes	6.42	6.42	7.45	6.5	6.42	6.42	acid	7.45	6.5	neutral	1:2.5 water				5			ND
Zhang et al., 2010a	control	FIELD	120	4	> 3 meses ≤ 1 año										Fine	hydroagric Stagnic Anthrosol	yes	6.5	6.5	6.48	6.48	6.42424	6.42	acid	6.40404	6.4	acid	1:5 water	1.01		0				organic carbon	2.4	2.35
Zhang et al., 2010a	test	FIELD	120	4	> 3 meses ≤ 1 año	Straw	350-550	300-500	10.4	10.4					Fine	hydroagric Stagnic Anthrosol	yes	6.5	6.5	6.67	6.48	6.42424	6.42	acid	6.59596	6.4	neutral	1:5 water	1.01		10				organic carbon		2.59
Zhang et al., 2010a	test	FIELD	120	4	> 3 meses ≤ 1 año	Straw	350-550	300-500	10.4	10.4					Fine	hydroagric Stagnic Anthrosol	yes	6.5	6.5	6.94	6.48	6.42424	6.42	acid	6.86869	6.4	neutral	1:5 water	1.01		40				organic carbon		3.69
Zhang et al., 2010a	control	FIELD	120	4	> 3 meses ≤ 1 año										Fine	hydroagric Stagnic Anthrosol	yes	6.5	6.5	6.53	6.53	6.42424	6.42	acid	6.45455	6.45	acid	1:5 water	1.01		0				organic carbon		2.32
Zhang et al., 2010a	test	FIELD	120	4	> 3 meses ≤ 1 año	Straw	350-550	300-500	10.4	10.4					Fine	hydroagric Stagnic Anthrosol	yes	6.5	6.5	6.75	6.53	6.42424	6.42	acid	6.67677	6.45	neutral	1:5 water	1.01		10				organic carbon		2.71
Zhang et al., 2010a	test	FIELD	120	4	> 3 meses ≤ 1 año	Straw	350-550	300-500	10.4	10.4					Fine	hydroagric Stagnic Anthrosol	yes	6.5	6.5	6.77	6.53	6.42424	6.42	acid	6.69697	6.45	neutral	1:5 water	1.01		40				organic carbon		3.6
Zhang et al., 2011b	control	FIELD	90	3	≤ 3 meses										Medium	aquic Fluvent/calcareous loamy soil	yes	8.38	8.38	8.15	8.15	8.52398	8.52	alcaline	8.30065	8.3	alcaline	1:1 water	1.46		0				organic carbon	9.87	1.09
Zhang et al., 2011b	test	FIELD	90	3	≤ 3 meses	Straw	350-550	300-500	10.4				8.92	low	Medium	aquic Fluvent/calcareous loamy soil	yes	8.38	8.38	8.24	8.15	8.52398	8.52	alcaline	8.38804	8.3	alcaline	1:1 water	1.46		20				organic carbon		1.57
Zhang et al., 2011b	test	FIELD	90	3	≤ 3 meses	Straw	350-550	300-500	10.4				8.92	low	Medium	aquic Fluvent/calcareous loamy soil	yes	8.38	8.38	8.38	8.15	8.52398	8.52	alcaline	8.52398	8.3	alcaline	1:1 water	1.46		40				organic carbon		1.72
Zhang et al., 2011b	control	FIELD	90	3	≤ 3 meses										Medium	aquic Fluvent/calcareous loamy soil	yes	8.38	8.38	8.28	8.28	8.52398	8.52	alcaline	8.42688	8.43	alcaline	1:1 water	1.46		0				organic carbon		1.16
Zhang et al., 2011b	test	FIELD	90	3	≤ 3 meses	Straw	350-550	300-500	10.4				8.92	low	Medium	aquic Fluvent/calcareous loamy soil	yes	8.38	8.38	8.38	8.28	8.52398	8.52	alcaline	8.52398	8.43	alcaline	1:1 water	1.46		20				organic carbon		1.45
Zhang et al., 2011b	test	FIELD	90	3	≤ 3 meses	Straw	350-550	300-500	10.4				8.92	low	Medium	aquic Fluvent/calcareous loamy soil	yes	8.38	8.38	8.23	8.28	8.52398	8.52	alcaline	8.37833	8.43	alcaline	1:1 water	1.46		40				organic carbon		1.65
[truncated: 36 more columns]

## Sheet: Metadata Gases
Author(s)	Experiment type	Experiment period	Biochar feedstock	Pyrolosis temperature (°C) Group	Biochar pH	Biochar pH Group	Biochar EC (µS/cm)	Biochar EC (µS/cm) Group	Biochar SSA BET area (m2/g)	Biochar SSA BET area (m2/g) Group	Soil Texture	Fertilized soil (yes/no)	pH initial (T)	pH initial (C)	pH final (T)	pH final (C)	pH(initial) soil 1:2.5 water (T)	pH(initial) soil 1:2.5 water (C)	pH (initial) classification	pH(final) soil 1:2.5 water (T)	pH(final) soil 1:2.5 water (C)	pH (final) classification	pH measured method	Biochar rate (t/ha)	Biochar rate (%)	Soil EC (μS/cm) Initial	Soil EC (μS/cm) Group - Initial	Soil EC (μS/cm) Final	Soil EC (μS/cm) Group - Final	Carbon measurement method	% Soil Organic Carbon (SOC)- Initial	% Soil Organic Carbon (SOC) Group-Initial	% Soil Organic Carbon (SOC) Final	% Soil Organic Carbon (SOC) Group-Final	GHG	CH4 (t/ha) (T)	CH4 (t/ha) SD (T)	CH4 (t/ha) n (T)	CH4 (t/ha) (C)	CH4 (t/ha) SD (C)	CH4 (t/ha) n (C)	CO2 (t/ha) (T)	CO2 (t/ha) SD (T)	CO2 (t/ha) n (T)	CO2 (t/ha) (C)	CO2 (t/ha) SD (C)	CO2 (t/ha) n (C)	N2O (t/ha) (T)	N2O (t/ha) SD (T)
Wan et al., 2021	POT	> 3 months ≤1 year	Grass	501-700	7.9	alcaline			247	high	Coarse	yes	5.8	5.8			6.0188	6.0188	acid				ND		1					ND
Wan et al., 2021	POT	> 3 months ≤1 year	Grass	501-700	7.9	alcaline			247	high	Coarse	yes	5.8	5.8			6.0188	6.0188	acid				ND		3					ND
Wan et al., 2021	POT	> 3 months ≤1 year	Grass	501-700	7.9	alcaline			247	high	Coarse	yes	5.8	5.8			6.0188	6.0188	acid				ND		1					ND
Wan et al., 2021	POT	> 3 months ≤1 year	Grass	501-700	7.9	alcaline			247	high	Coarse	yes	5.8	5.8			6.0188	6.0188	acid				ND		3					ND
Wan et al., 2021	POT	> 3 months ≤1 year	Grass	501-700	7.9	alcaline			247	high	Coarse	yes	5.8	5.8			6.0188	6.0188	acid				ND		1					ND
Wan et al., 2021	POT	> 3 months ≤1 year	Grass	501-700	7.9	alcaline			247	high	Coarse	yes	5.8	5.8			6.0188	6.0188	acid				ND		3					ND
Li et al., 2021	INCUBATION	> 3 months ≤1 year	Straw	501-700					47.75	low		no	7.82	7.32	8.34	7.42	7.75758	7.25253	alcaline	8.28283	7.35354	alcaline	1:5 water		3					organic matter			1.7168	>1% ≤10%
Li et al., 2021	INCUBATION	> 3 months ≤1 year	Straw	>700					65.25	medium		no	7.92	7.32	8.53	7.42	7.85859	7.25253	alcaline	8.47475	7.35354	alcaline	1:5 water		3					organic matter			1.595	>1% ≤10%
Li et al., 2021	INCUBATION	> 3 months ≤1 year	Straw	501-700					72.18	medium		no	7.88	7.32	8.51	7.42	7.81818	7.25253	alcaline	8.45455	7.35354	alcaline	1:5 water		3					organic matter			1.6472	>1% ≤10%
Li et al., 2021	INCUBATION	> 3 months ≤1 year	Straw	>700					106.87	medium		no	7.96	7.32	8.63	7.42	7.89899	7.25253	alcaline	8.57576	7.35354	alcaline	1:5 water		3					organic matter			1.5109	>1% ≤10%
Li et al., 2021	INCUBATION	> 3 months ≤1 year	Straw	501-700					98.67	medium		no	7.9	7.32	8.57	7.42	7.83838	7.25253	alcaline	8.51515	7.35354	alcaline	1:5 water		3					organic matter			1.58688	>1% ≤10%
Li et al., 2021	INCUBATION	> 3 months ≤1 year	Straw	>700					128.74	medium		no	8.02	7.32	8.72	7.42	7.9596	7.25253	alcaline	8.66667	7.35354	alcaline	1:5 water		3					organic matter			1.4906	>1% ≤10%
Ducey et al., 2021	POT	≤3 months	Manure	300-500	9.5	strongly alcaline					Medium	yes	4.4	4.4	5.1	4.4	4.6594	4.6594	acid	5.3391	4.6594	acid	1:1 water		2.5			2622	high	ND
Ducey et al., 2021	POT	≤3 months	Manure	300-500	9.5	strongly alcaline					Medium	yes	4.4	4.4	5.3	4.4	4.6594	4.6594	acid	5.5333	4.6594	acid	1:1 water		2.5			4739	high	ND
Ducey et al., 2021	POT	≤3 months	Manure	300-500	9.5	strongly alcaline					Medium	yes	4.4	4.4	5.3	4.4	4.6594	4.6594	acid	5.5333	4.6594	acid	1:1 water		5			4371	high	ND
Ducey et al., 2021	POT	≤3 months	Manure	300-500	9.5	strongly alcaline					Medium	yes	4.4	4.4	5.9	4.4	4.6594	4.6594	acid	6.1159	4.6594	acid	1:1 water		5			5596	high	ND
Ducey et al., 2021	POT	≤3 months	Manure	300-500	9.1	strongly alcaline					Medium	yes	4.4	4.4	5.5	4.4	4.6594	4.6594	acid	5.7275	4.6594	acid	1:1 water		2.5			14257	high	ND
Ducey et al., 2021	POT	≤3 months	Manure	300-500	9.1	strongly alcaline					Medium	yes	4.4	4.4	5.9	4.4	4.6594	4.6594	acid	6.1159	4.6594	acid	1:1 water		2.5			15770	high	ND
Ducey et al., 2021	POT	≤3 months	Manure	300-500	9.1	strongly alcaline					Medium	yes	4.4	4.4	6.3	4.4	4.6594	4.6594	acid	6.5043	4.6594	acid	1:1 water		5			27670	high	ND
Ducey et al., 2021	POT	≤3 months	Manure	300-500	9.1	strongly alcaline					Medium	yes	4.4	4.4	6.6	4.4	4.6594	4.6594	acid	6.7956	4.6594	neutal	1:1 water		5			27657	high	ND
Campos et al., 2021	FIELD	>2 years	Residues	300-500	9.34	strongly alcaline			382.5	high	Coarse	no	3.85	3.85	4.6	4.6	4.56324	4.56324	acid	5.30435	5.30435	acid	1:5 0.01 M CaCl2	8				2200	high	Total carbon	0.6084	≤1%	1.6393	>1% ≤10%
Campos et al., 2021	FIELD	>2 years	Residues	300-500	10.17	strongly alcaline			382.5	high	Coarse	no	3.85	3.85	4.7	4.6	4.56324	4.56324	acid	5.40316	5.30435	acid	1:5 0.01 M CaCl2	8				1900	high	Total carbon	0.6084	≤1%	1.9604	>1% ≤10%
Campos et al., 2021	FIELD	>2 years	Wood	501-700	9.7	strongly alcaline			382.5	high	Coarse	no											1:5 0.01 M CaCl2							ND
Campos et al., 2021	FIELD	>2 years	Residues	300-500	9.34	strongly alcaline			382.5	high	Coarse	no	4.82	4.82	6.2	6.4	5.52174	5.52174	acid	6.88538	7.083	neutral	1:5 0.01 M CaCl2	8				100	low	Total carbon	7.605	>1% ≤10%	1.79985	>1% ≤10%
Campos et al., 2021	FIELD	>2 years	Residues	300-500	10.17	strongly alcaline			382.5	high	Coarse	no	4.82	4.82	6.4	6.4	5.52174	5.52174	acid	7.083	7.083	neutral	1:5 0.01 M CaCl2	8				100	low	Total carbon	7.605	>1% ≤10%	2.05335	>1% ≤10%
Campos et al., 2021	FIELD	>2 years	Wood	501-700	9.7	strongly alcaline			382.5	high	Coarse	no											1:5 0.01 M CaCl2							ND
Campos et al., 2021	FIELD	>2 years	Residues	300-500	9.34	strongly alcaline			382.5	high	Coarse	no			5.2	5.1				5.89723	5.79842	acid	1:5 0.01 M CaCl2	8				1000	medium	Total carbon			0.845	≤1%
Campos et al., 2021	FIELD	>2 years	Residues	300-500	10.17	strongly alcaline			382.5	high	Coarse	no			5	5.1				5.6996	5.79842	acid	1:5 0.01 M CaCl2	8				800	medium	Total carbon			0.78585	≤1%
Campos et al., 2021	FIELD	>2 years	Wood	501-700	9.7	strongly alcaline			382.5	high	Coarse	no											1:5 0.01 M CaCl2							ND
Campos et al., 2021	FIELD	>2 years	Residues	300-500	9.34	strongly alcaline			382.5	high	Coarse	no			6.3	6.5				6.98419	7.18182	neutral	1:5 0.01 M CaCl2	8				200	medium	Total carbon			0.83655	≤1%
Campos et al., 2021	FIELD	>2 years	Residues	300-500	10.17	strongly alcaline			382.5	high	Coarse	no			6.5	6.5				7.18182	7.18182	neutral	1:5 0.01 M CaCl2	8				200	medium	Total carbon			1.07315	>1% ≤10%
Campos et al., 2021	FIELD		Wood	501-700	9.7	strongly alcaline			382.5	high	Coarse	no											1:5 0.01 M CaCl2							ND
Song et al., 2021	FIELD	> 3 months ≤1 year	Residues	300-500	9.12	strongly alcaline			78.6	medium	Coarse	yes			7.4	7.2				7.4	7.2	neutral	1:2 water	18						organic matter			1.6182	>1% ≤10%
Lan et al., 2021	INCUBATION	≤3 months	Wood	300-500									5.35	5			5.58185	5.242	acid				ND		1			3240	high	ND	0.49648	≤1%
Lan et al., 2021	INCUBATION	≤3 months	Wood	300-500									5.8	5			6.0188	5.242	acid				ND		3			130	medium	ND	0.49648	≤1%
Lan et al., 2021	INCUBATION	≤3 months	Wood	300-500									6.5	5			6.6985	5.242	neutral				ND		5			202	medium	organic matter	0.74646	≤1%
Hussain et al., 2021	POT	≤3 months	Residues	300-500	9.03	alcaline	1670	high	31.54	low		no	7.06	6.96	7.16	7.05	7.24226	7.14516	neutral	7.33936	7.23255	neutral	ND		5	9940	high	237	medium	organic carbon-organic matter	0.85	≤1%	1.34	>1% ≤10%
Hussain et al., 2021	POT	≤3 months	Residues	300-500	9.03	alcaline	1670	high	31.54	low		no	7.05	6.96	7.06	7.05	7.23255	7.14516	neutral	7.24226	7.23255	neutral	ND		5	11490	high	223	medium	organic carbon-organic matter	1.09	>1% ≤10%	1.47	>1% ≤10%
Haddad & Lemanowicz, 2021	FIELD	≤3 months	Residues	501-700	6.31	acid	651	Medium			Fine	yes	7.7	7.7			7.7	7.7	alcaline				1:2.5 water	20		1220	high	627	medium	ND	1.68	>1% ≤10%
Haddad & Lemanowicz, 2021	FIELD	≤3 months	Residues	501-700	6.31	acid	651	Medium			Fine	yes	7.7	7.7			7.7	7.7	alcaline				1:2.5 water	40		1220	high	651	medium	ND	1.68	>1% ≤10%
Haddad & Lemanowicz, 2021	FIELD	≤3 months	Residues	501-700	6.31	acid	651	Medium			Coarse	yes	8.5	8.5			8.5	8.5	alcaline				1:2.5 water	20		2580	high			ND	0.41	≤1%
Haddad & Lemanowicz, 2021	FIELD	≤3 months	Residues	501-700	6.31	acid	651	Medium			Coarse	yes	8.5	8.5			8.5	8.5	alcaline				1:2.5 water	40		2580	high	3000	high	ND	0.41	≤1%
Bandara et al., 2021	INCUBATION	≤3 months	Manure	501-700	10.34	strongly alcaline	4010	high	264	high	Medium	no	4.6	4.6	7	5	5.30435	5.30435	acid	7.67589	5.6996	alcaline	1:5 0.01 M CaCl2		3	131	medium	40	low	organic carbon	20.5	>10%	32	>10%
Bandara et al., 2021	INCUBATION	≤3 months	Manure	501-700	10.34	strongly alcaline	4010	high	264	high	Medium	no	5.7	5.7	7.8	6	6.3913	6.3913	acid	8.4664	6.68775	alcaline	1:5 0.01 M CaCl2		3	131	medium	40	low	organic carbon	20.5	>10%	23	>10%
Bandara et al., 2021	INCUBATION	≤3 months	Manure	501-700	10.34	strongly alcaline	4010	high	264	high	Medium	no	6.4	6.4	8	6.5	7.083	7.083	neutral	8.66403	7.18182	alcaline	1:5 0.01 M CaCl2		3	131	medium	40	low	organic carbon	20.5	>10%	18	>10%
Bandara et al., 2021	INCUBATION	≤3 months	Manure	501-700	10.34	strongly alcaline	4010	high	264	high	Medium	no	7.1	7.1	8.5	7.4	7.7747	7.7747	alcaline	9.1581	8.07115	strongly alcaline	1:5 0.01 M CaCl2		3	131	medium	1260	high	organic carbon	20.5	>10%	18	>10%
Bandara et al., 2021	INCUBATION	≤3 months	Manure	501-700	10.34	strongly alcaline	4010	high	264	high	Medium	no	7.4	7.4	8.6	7.6	8.07115	8.07115	alcaline	9.25692	8.26877	strongly alcaline	1:5 0.01 M CaCl2		3	131	medium	910	medium	organic carbon	20.5	>10%	20	>10%
Bandara et al., 2021	INCUBATION	≤3 months	Wood	501-700	9.71	strongly alcaline	900	Medium	429	high	Medium	no	4.6	4.6	6	5	5.30435	5.30435	acid	6.68775	5.6996	neutral	1:5 0.01 M CaCl2		3	131	medium	1030	high	organic carbon	20.5	>10%	3	>1% ≤10%
Bandara et al., 2021	INCUBATION	≤3 months	Wood	501-700	9.71	strongly alcaline	900	Medium	429	high	Medium	no	5.7	5.7	6.6	6	6.3913	6.3913	acid	7.28063	6.68775	neutral	1:5 0.01 M CaCl2		3	131	medium	1080	high	organic carbon	20.5	>10%	5	>1% ≤10%
Bandara et al., 2021	INCUBATION	≤3 months	Wood	501-700	9.71	strongly alcaline	900	Medium	429	high	Medium	no	6.4	6.4	7	6.5	7.083	7.083	neutral	7.67589	7.18182	alcaline	1:5 0.01 M CaCl2		3	131	medium	980	medium	organic carbon	20.5	>10%	11	>10%
Bandara et al., 2021	INCUBATION	≤3 months	Wood	501-700	9.71	strongly alcaline	900	Medium	429	high	Medium	no	7.1	7.1	7.6	7.4	7.7747	7.7747	alcaline	8.26877	8.07115	alcaline	1:5 0.01 M CaCl2		3	131	medium	1190	high	organic carbon	20.5	>10%	13	>10%
Bandara et al., 2021	INCUBATION	≤3 months	Wood	501-700	9.71	strongly alcaline	900	Medium	429	high	Medium	no	7.4	7.4	7.8	7.6	8.07115	8.07115	alcaline	8.4664	8.26877	alcaline	1:5 0.01 M CaCl2		3	131	medium	1080	high	organic carbon	20.5	>10%	15	>10%
Wang et al., 2021	INCUBATION	≤3 months	Straw	300-500	8.32	alcaline					Fine	no	6.42	5.57	6.47	5.6	6.42	5.57	acid	6.47	5.6	acid	1:2 water		1			205	medium	ND
Wang et al., 2021	INCUBATION	≤3 months	Straw	300-500	7.47	neutral					Fine	no	6.32	5.57	6.3	5.6	6.32	5.57	acid	6.3	5.6	acid	1:2 water		1			190	medium	ND
Wang et al., 2021	INCUBATION	≤3 months	Straw	300-500	7.55	alcaline					Fine	no	6.57	5.57	6.62	5.6	6.57	5.57	acid	6.62	5.6	neutral	1:2 water		1			238	medium	ND
Wang et al., 2021	INCUBATION	≤3 months	Straw	300-500	8.39	alcaline					Fine	no	6.57	5.57	6.68	5.6	6.57	5.57	acid	6.68	5.6	neutral	1:2 water		1			355	medium	ND
Wang et al., 2021	INCUBATION	≤3 months	Straw	300-500	8.32	alcaline					Fine	no	6.65	5.75	6.8	6.1	6.65	5.75	neutral	6.8	6.1	neutral	1:2 water		1			335	medium	ND
Wang et al., 2021	INCUBATION	≤3 months	Straw	300-500	7.47	neutral					Fine	no	6.54	5.75	7	6.1	6.54	5.75	acid	7	6.1	neutral	1:2 water		1			350	medium	ND
Wang et al., 2021	INCUBATION	≤3 months	Straw	300-500	7.55	alcaline					Fine	no	6.7	5.75	6.88	6.1	6.7	5.75	neutral	6.88	6.1	neutral	1:2 water		1			115	medium	ND
Wang et al., 2021	INCUBATION	≤3 months	Straw	300-500	8.39	alcaline					Fine	no	6.66	5.75	6.9	6.1	6.66	5.75	neutral	6.9	6.1	neutral	1:2 water		1					ND
Muhammad et al., 2021	INCUBATION	≤3 months	Straw	501-700	7.3	neutral	690	medium	0.5762	low	Coarse	no	7.37	7.3	7.41	7.34	7.37	7.3	neutral	7.41	7.34	neutral	1:2.5 water		1.5	5100	high	7700	high	organic matter	2.175	>1% ≤10%	2.61	>1% ≤10%
Muhammad et al., 2021	INCUBATION	≤3 months	Straw	501-700	7.3	neutral	690	medium	0.5762	low	Coarse	no	7.39	7.3	7.46	7.34	7.39	7.3	neutral	7.46	7.34	neutral	1:2.5 water		3	5300	high	7900	high	organic matter	2.175	>1% ≤10%	2.726	>1% ≤10%
Muhammad et al., 2021	INCUBATION	≤3 months	Straw	501-700	10.41	strongly alcaline	726	medium	15.6494	low	Coarse	no	7.4	7.3	7.61	7.34	7.4	7.3	neutral	7.61	7.34	alcaline	1:2.5 water		1.5	5050	high	7500	high	organic matter	2.175	>1% ≤10%	2.436	>1% ≤10%
Muhammad et al., 2021	INCUBATION	≤3 months	Straw	501-700	10.41	strongly alcaline	726	medium	15.6494	low	Coarse	no	7.42	7.3	7.68	7.34	7.42	7.3	neutral	7.68	7.34	alcaline	1:2.5 water		3	5200	high	7650	high	organic matter	2.175	>1% ≤10%	2.552	>1% ≤10%
Muhammad et al., 2021	INCUBATION	≤3 months	Straw	501-700	9.76	strongly alcaline	840	medium	3.7746	low	Coarse	no	7.42	7.3	7.63	7.34	7.42	7.3	neutral	7.63	7.34	alcaline	1:2.5 water		1.5	5150	high	7550	high	organic matter	2.175	>1% ≤10%	2.784	>1% ≤10%
Muhammad et al., 2021	INCUBATION	≤3 months	Straw	501-700	9.76	strongly alcaline	840	medium	3.7746	low	Coarse	no	7.44	7.3	7.72	7.34	7.44	7.3	neutral	7.72	7.34	alcaline	1:2.5 water		3	5250	high	7900	high	organic matter	2.175	>1% ≤10%	2.9	>1% ≤10%
Muhammad et al., 2021	INCUBATION	≤3 months	Straw	501-700	7.3	neutral	690	medium	0.5762	low	Coarse	no	7.37	7.3	7.49	7.44	7.37	7.3	neutral	7.49	7.44	neutral	1:2.5 water		1.5	5100	high	7850	high	organic matter	2.175	>1% ≤10%	2.784	>1% ≤10%
Muhammad et al., 2021	INCUBATION	≤3 months	Straw	501-700	7.3	neutral	690	medium	0.5762	low	Coarse	no	7.39	7.3	7.5	7.44	7.39	7.3	neutral	7.5	7.44	neutral	1:2.5 water		3	5300	high	7800	high	organic matter	2.175	>1% ≤10%	2.552	>1% ≤10%
Muhammad et al., 2021	INCUBATION	≤3 months	Straw	501-700	10.41	strongly alcaline	726	medium	15.6494	low	Coarse	no	7.4	7.3	7.8	7.44	7.4	7.3	neutral	7.8	7.44	alcaline	1:2.5 water		1.5	5050	high	7900	high	organic matter	2.175	>1% ≤10%	2.262	>1% ≤10%
Muhammad et al., 2021	INCUBATION	≤3 months	Straw	501-700	10.41	strongly alcaline	726	medium	15.6494	low	Coarse	no	7.42	7.3	7.85	7.44	7.42	7.3	neutral	7.85	7.44	alcaline	1:2.5 water		3	5200	high	7880	high	organic matter	2.175	>1% ≤10%	2.5694	>1% ≤10%
Muhammad et al., 2021	INCUBATION	≤3 months	Straw	501-700	9.76	strongly alcaline	840	medium	3.7746	low	Coarse	no	7.42	7.3	7.84	7.44	7.42	7.3	neutral	7.84	7.44	alcaline	1:2.5 water		1.5	5150	high	7990	high	organic matter	2.175	>1% ≤10%	2.813	>1% ≤10%
Muhammad et al., 2021	INCUBATION	≤3 months	Straw	501-700	9.76	strongly alcaline	840	medium	3.7746	low	Coarse	no	7.44	7.3	7.9	7.44	7.44	7.3	neutral	7.9	7.44	alcaline	1:2.5 water		3	5250	high	8000	high	organic matter	2.175	>1% ≤10%	2.842	>1% ≤10%
Muhammad et al., 2021	INCUBATION	≤3 months	Straw	501-700	7.3	neutral	690	medium	0.5762	low	Coarse	no	7.37	7.3	7.53	7.44	7.37	7.3	neutral	7.53	7.44	neutral	1:2.5 water		1.5	5100	high	7680	high	organic matter	2.175	>1% ≤10%	2.668	>1% ≤10%
Muhammad et al., 2021	INCUBATION	≤3 months	Straw	501-700	7.3	neutral	690	medium	0.5762	low	Coarse	no	7.39	7.3	7.58	7.44	7.39	7.3	neutral	7.58	7.44	neutral	1:2.5 water		3	5300	high	7700	high	organic matter	2.175	>1% ≤10%	2.61	>1% ≤10%
Muhammad et al., 2021	INCUBATION	≤3 months	Straw	501-700	10.41	strongly alcaline	726	medium	15.6494	low	Coarse	no	7.4	7.3	7.89	7.44	7.4	7.3	neutral	7.89	7.44	alcaline	1:2.5 water		1.5	5050	high	7850	high	organic matter	2.175	>1% ≤10%	2.262	>1% ≤10%
Muhammad et al., 2021	INCUBATION	≤3 months	Straw	501-700	10.41	strongly alcaline	726	medium	15.6494	low	Coarse	no	7.42	7.3	7.98	7.44	7.42	7.3	neutral	7.98	7.44	alcaline	1:2.5 water		3	5200	high	7900	high	organic matter	2.175	>1% ≤10%	2.378	>1% ≤10%
Muhammad et al., 2021	INCUBATION	≤3 months	Straw	501-700	9.76	strongly alcaline	840	medium	3.7746	low	Coarse	no	7.42	7.3	7.94	7.44	7.42	7.3	neutral	7.94	7.44	alcaline	1:2.5 water		1.5	5150	high	7980	high	organic matter	2.175	>1% ≤10%	2.552	>1% ≤10%
Muhammad et al., 2021	INCUBATION	≤3 months	Straw	501-700	9.76	strongly alcaline	840	medium	3.7746	low	Coarse	no	7.44	7.3	8.2	7.44	7.44	7.3	neutral	8.2	7.44	alcaline	1:2.5 water		3	5250	high	8050	high	organic matter	2.175	>1% ≤10%	2.668	>1% ≤10%
Nissen et al., 2021	POT	≤3 months	Straw	>700	10.2	strongly alcaline					Coarse	no	5.4	5.4	7.6	5.4	6.00095	6.00095	acid	8.10019	6.00095	alcaline	1:2.5 0.01 M CaCl2		10					ND	1.8	>1% ≤10%
Nissen et al., 2021	POT	≤3 months	Straw	>700	8.5	alcaline					Coarse	no	5.4	5.4	7.8	5.4	6.00095	6.00095	acid	8.29103	6.00095	alcaline	1:2.5 0.01 M CaCl2		10					ND	1.8	>1% ≤10%
Nissen et al., 2021	POT	≤3 months	Wood	>700	9.6	strongly alcaline					Coarse	no	5.4	5.4	6.3	5.4	6.00095	6.00095	acid	6.85973	6.00095	neutral	1:2.5 0.01 M CaCl2		10					ND	1.8	>1% ≤10%
Nissen et al., 2021	POT	≤3 months	Wood	501-700	9.4	strongly alcaline					Coarse	no	5.4	5.4	6.8	5.4	6.00095	6.00095	acid	7.33683	6.00095	neutral	1:2.5 0.01 M CaCl2		10					ND	1.8	>1% ≤10%
Nissen et al., 2021	POT	≤3 months	Wood	300-500	9.5	strongly alcaline					Coarse	no	5.4	5.4	5.8	5.4	6.00095	6.00095	acid	6.38263	6.00095	acid	1:2.5 0.01 M CaCl2		10					ND	1.8	>1% ≤10%
Lebrun et al., 2021	POT	≤3 months	Wood	300-500	8.98	alcaline	432	medium	43.91	low	Coarse	no	3.7	3.7	7.43	3.66	3.9797	3.9797	strongly acid	7.60153	3.94086	alcaline	1:1 water		5					total carbon	1.508	>1% ≤10%	3.62505	>1% ≤10%
Lebrun et al., 2021	POT	≤3 months	Wood	300-500	8.98	alcaline	432	medium	43.91	low	Coarse	no	3.7	3.7	7.47	3.78	3.9797	3.9797	strongly acid	7.64037	4.05738	alcaline	1:1 water		5					total carbon	1.508	>1% ≤10%	3.3293	>1% ≤10%
Zhang et al., 2021	FIELD	> 3 months ≤1 year	Straw	300-500	7.61	alcaline						yes	4.4	4.4	4.03	4.3	4.4	4.4	strongly acid	4.03	4.3	strongly acid	1:2.5 water							organic matter	2.10308	>1% ≤10%	2.21328	>1% ≤10%
Zhang et al., 2021	FIELD	> 3 months ≤1 year	Straw	300-500	7.61	alcaline						yes	4.4	4.4	4.15	4.3	4.4	4.4	strongly acid	4.15	4.3	strongly acid	1:2.5 water							organic matter	2.10308	>1% ≤10%	3.34704	>1% ≤10%
Zhang et al., 2021	FIELD	> 3 months ≤1 year	Straw	300-500	7.61	alcaline						yes	4.4	4.4	4.37	4.3	4.4	4.4	strongly acid	4.37	4.3	strongly acid	1:2.5 water							organic matter	2.10308	>1% ≤10%	2.57926	>1% ≤10%
Li et al., 2020	POT	≤3 months	Residues	300-500	9.1	strongly alcaline	0.16	low	60.18	medium		no	5.98	5.98	6.27	5.68				6.19192	5.59596	acid	1:5 water		5			0.16	low	ND	36.1514	>10%
Li et al., 2020	POT	≤3 months	Residues	300-500	9.1	strongly alcaline	0.16	low	60.18	medium		no	5.98	5.98	6.67	5.68				6.59596	5.59596	neutral	1:5 water		5			0.58	low	ND	36.1514	>10%
Terekhova et al., 2021	POT	≤3 months	Wood		8.9	alcaline					Fine	no	6.74	6.74	6.74	6.74	6.63908	6.63908	neutral	6.63908	6.63908	neutral	1:4 water		5					ND	3.86	>1% ≤10%
Terekhova et al., 2021	POT	≤3 months	Wood		8.9	alcaline					Fine	no	6.74	6.74	6.74	6.74	6.63908	6.63908	neutral	6.63908	6.63908	neutral	1:4 water		5					ND	3.86	>1% ≤10%
Terekhova et al., 2021	POT	≤3 months	Wood		8.9	alcaline					Fine	no	6.74	6.74	6.74	6.74	6.63908	6.63908	neutral	6.63908	6.63908	neutral	1:4 water		5					ND	3.86	>1% ≤10%
Terekhova et al., 2021	POT	≤3 months	Wood		8.9	alcaline					Fine	no	6.74	6.74	6.74	6.74	6.63908	6.63908	neutral	6.63908	6.63908	neutral	1:4 water		5					ND	3.86	>1% ≤10%
Terekhova et al., 2021	POT	≤3 months	Wood		8.9	alcaline					Fine	no	6.28	6.28	6.28	6.28	6.18046	6.18046	acid	6.18046	6.18046	acid	1:4 water		5					ND	1.3	>1% ≤10%
Terekhova et al., 2021	POT	≤3 months	Wood		8.9	alcaline					Fine	no	6.28		6.28		6.18046		acid	6.18046		acid	1:4 water		5					ND	1.3	>1% ≤10%
Terekhova et al., 2021	POT	≤3 months	Wood		8.9	alcaline					Fine	no	6.28		6.28		6.18046		acid	6.18046		acid	1:4 water		5					ND	1.3	>1% ≤10%
Terekhova et al., 2021	POT	≤3 months	Wood		8.9	alcaline					Fine	no	6.28		6.28		6.18046		acid	6.18046		acid	1:4 water		5					ND	1.3	>1% ≤10%
Morugan-Coronado et al., 2020	POT	>1 year ≤2 years	Manure	300-500	10.52	strongly alcaline	3990	high			Fine	no	8.4	8.4	7.84	3.65	8.4	8.4	alcaline	7.84	3.65	alcaline	1:2.5 water		0.5			130	medium	organic carbon / total carbon	1.19	>1% ≤10%	2.05	>1% ≤10%
Morugan-Coronado et al., 2020	POT	>1 year ≤2 years	Manure	300-500	10.52	strongly alcaline	3990	high			Fine	no	8.4	8.4	7.68	3.65	8.4	8.4	alcaline	7.68	3.65	alcaline	1:2.5 water		0.5			202	medium	organic carbon / total carbon	1.19	>1% ≤10%	2.96	>1% ≤10%
Morugan-Coronado et al., 2020	POT	>1 year ≤2 years	Manure	300-500	10.52	strongly alcaline	3990	high			Fine	no	8.4	8.4	7.62	3.65	8.4	8.4	alcaline	7.62	3.65	alcaline	1:2.5 water		0.5			224	medium	organic carbon / total carbon	1.19	>1% ≤10%	3.18	>1% ≤10%
Morugan-Coronado et al., 2020	POT	>1 year ≤2 years	Manure	300-500	10.52	strongly alcaline	3990	high			Fine	no	8.4	8.4	7.85	3.65	8.4	8.4	alcaline	7.85	3.65	alcaline	1:2.5 water		1			237	medium	organic carbon / total carbon	1.19	>1% ≤10%	2.71	>1% ≤10%
Morugan-Coronado et al., 2020	POT	>1 year ≤2 years	Manure	300-500	10.52	strongly alcaline	3990	high			Fine	no	8.4	8.4	7.65	3.65	8.4	8.4	alcaline	7.65	3.65	alcaline	1:2.5 water		1			223	medium	organic carbon / total carbon	1.19	>1% ≤10%	3.68	>1% ≤10%
Morugan-Coronado et al., 2020	POT	>1 year ≤2 years	Manure	300-500	10.52	strongly alcaline	3990	high			Fine	no	8.4	8.4	7.64	3.65	8.4	8.4	alcaline	7.64	3.65	alcaline	1:2.5 water		1			617	medium	organic carbon / total carbon	1.19	>1% ≤10%	3.96	>1% ≤10%
Simiele et al., 2020	POT	≤3 months	Wood	300-500	8.46	alcaline	302	medium	4.38	low	Coarse	no	4.82	4.82	6.9	5.3	4.82	4.82	acid	6.9	5.3	neutral	1:2.5 water		2.5			651	medium	organic carbon			5.47	>1% ≤10%
Simiele et al., 2020	POT	≤3 months	Wood	300-500	8.46	alcaline	302	medium	4.38	low	Coarse	no	4.82	4.82	6.9	5.3	4.82	4.82	acid	6.9	5.3	neutral	1:2.5 water		2.5			748	medium	organic carbon			6.73	>1% ≤10%
Bouhia et al., 2021	POT	≤3 months	Wood		8.75	alcaline	400	medium			Fine	yes	8.34	8.19	8.48	8.18	8.28283	8.13131	alcaline	8.42424	8.12121	alcaline	1:5 water		1.2			1.44	low	organic carbon	1.61	>1% ≤10%	3.18	>1% ≤10%
Mierzwa‑Hersztek et al., 2020	POT	> 3 months ≤1 year	Straw	300-500	6.52	acid	3780	high	0.67	low	Coarse	yes	5.67	4.68	5.23	4.65	5.67	4.68	acid	5.23	4.65	acid	1:2.5 water		0.2	54	low	202	medium	total carbon	0.532096	≤1%	0.611104	≤1%
Mierzwa‑Hersztek et al., 2019	POT	> 3 months ≤1 year	Straw	300-500	6.52	acid	3780	high	0.67	low	Coarse	yes	5.67	4.68	5.57	4.65	5.67	4.68	acid	5.57	4.65	acid	1:2.5 water		0.5	54	low	224	medium	total carbon	0.532096	≤1%	0.766837	≤1%
Mierzwa‑Hersztek et al., 2019	POT	> 3 months ≤1 year	Straw	300-500	6.52	acid	3780	high	0.67	low	Coarse	yes	5.67	4.68	5.68	4.65	5.67	4.68	acid	5.68	4.65	acid	1:2.5 water		1	54	low	237	medium	total carbon	0.532096	≤1%	1.09343	>1% ≤10%
Mierzwa‑Hersztek et al., 2019	POT	> 3 months ≤1 year	Straw	300-500	6.52	acid	3780	high	0.67	low	Coarse	yes	5.67	4.68	6.05	4.65	5.67	4.68	acid	6.05	4.65	acid	1:2.5 water		2	54	low	223	medium	total carbon	0.532096	≤1%	1.24553	>1% ≤10%
Mierzwa‑Hersztek et al., 2019	POT	> 3 months ≤1 year	Straw	300-500	6.52	acid	3780	high	0.67	low	Coarse	yes	5.67	4.68	4.7	4.65	5.67	4.68	acid	4.7	4.65	acid	1:2.5 water		0.2	54	low	617	medium	total carbon	0.532096	≤1%	0.568939	≤1%
Mierzwa‑Hersztek et al., 2019	POT	> 3 months ≤1 year	Straw	300-500	6.52	acid	3780	high	0.67	low	Coarse	yes	5.67	4.68	4.83	4.65	5.67	4.68	acid	4.83	4.65	acid	1:2.5 water		0.5	54	low	627	medium	total carbon	0.532096	≤1%	0.769541	≤1%
Mierzwa‑Hersztek et al., 2019	POT	> 3 months ≤1 year	Straw	300-500	6.52	acid	3780	high	0.67	low	Coarse	yes	5.67	4.68	4.97	4.65	5.67	4.68	acid	4.97	4.65	acid	1:2.5 water		1	54	low	651	medium	total carbon	0.532096	≤1%	1.03344	>1% ≤10%
Mierzwa‑Hersztek et al., 2019	POT	> 3 months ≤1 year	Straw	300-500	6.52	acid	3780	high	0.67	low	Coarse	yes	5.67	4.68	5.29	4.65	5.67	4.68	acid	5.29	4.65	acid	1:2.5 water		2	54	low	748	medium	total carbon	0.532096	≤1%	1.39425	>1% ≤10%
Zhang et al., 2020	POT	≤3 months	Residues	300-500	8.91	alcaline			60.16	medium			7.81	7.81	7.07	6.96	7.81	7.81	alcaline	7.07	6.96	neutral	1:2.5 water		0.5					ND	3.2786	>1% ≤10%
Zhang et al., 2020	POT	≤3 months	Residues	300-500	8.91	alcaline			60.16	medium			7.81	7.81	6.95	6.96	7.81	7.81	alcaline	6.95	6.96	neutral	1:2.5 water		1					ND	3.2786	>1% ≤10%
Zhang et al., 2020	POT	≤3 months	Residues	300-500	8.91	alcaline			60.16	medium			7.81	7.81	6.83	6.96	7.81	7.81	alcaline	6.83	6.96	neutral	1:2.5 water		2					ND	3.2786	>1% ≤10%
Zhang et al., 2020	POT	≤3 months	Residues	300-500	9.41	strongly alcaline			27.16	low			7.81	7.81	6.59	6.96	7.81	7.81	alcaline	6.59	6.96	acid	1:2.5 water		0.5					ND	3.2786	>1% ≤10%
Zhang et al., 2020	POT	≤3 months	Residues	300-500	9.41	strongly alcaline			27.16	low			7.81	7.81	6.34	6.96	7.81	7.81	alcaline	6.34	6.96	acid	1:2.5 water		1					ND	3.2786	>1% ≤10%
Zhang et al., 2020	POT	≤3 months	Residues	300-500	9.41	strongly alcaline			27.16	low			7.81	7.81	6.83	6.96	7.81	7.81	alcaline	6.83	6.96	neutral	1:2.5 water		2					ND	3.2786	>1% ≤10%
Zhang et al., 2020	POT	≤3 months	Residues	300-500	9.64	strongly alcaline			36.21	low			7.81	7.81	7.07	6.96	7.81	7.81	alcaline	7.07	6.96	neutral	1:2.5 water		0.5					ND	3.2786	>1% ≤10%
Zhang et al., 2020	POT	≤3 months	Residues	300-500	9.64	strongly alcaline			36.21	low			7.81	7.81	6.59	6.96	7.81	7.81	alcaline	6.59	6.96	acid	1:2.5 water		1					ND	3.2786	>1% ≤10%
Zhang et al., 2020	POT	≤3 months	Residues	300-500	9.64	strongly alcaline			36.21	low			7.81	7.81	6.71	6.96	7.81	7.81	alcaline	6.71	6.96	neutral	1:2.5 water		2					ND	3.2786	>1% ≤10%
Zhang et al., 2020	POT	≤3 months	Residues	300-500	9.72	strongly alcaline			46.87	low			7.81	7.81	7.07	6.96	7.81	7.81	alcaline	7.07	6.96	neutral	1:2.5 water		0.5					ND	3.2786	>1% ≤10%
Zhang et al., 2020	POT	≤3 months	Residues	300-500	9.72	strongly alcaline			46.87	low			7.81	7.81	6.59	6.96	7.81	7.81	alcaline	6.59	6.96	acid	1:2.5 water		1					ND	3.2786	>1% ≤10%
Zhang et al., 2020	POT	≤3 months	Residues	300-500	9.72	strongly alcaline			46.87	low			7.81	7.81	6.83	6.96	7.81	7.81	alcaline	6.83	6.96	neutral	1:2.5 water		2					ND	3.2786	>1% ≤10%
Zhang et al., 2020	POT	≤3 months	Residues	300-500	8.91	alcaline			60.16	medium			7.25	7.25	6.87	7.02	7.25	7.25	neutral	6.87	7.02	neutral	1:2.5 water		0.5					ND	3.2617	>1% ≤10%
Zhang et al., 2020	POT	≤3 months	Residues	300-500	8.91	alcaline			60.16	medium			7.25	7.25	6.87	7.02	7.25	7.25	neutral	6.87	7.02	neutral	1:2.5 water		1					ND	3.2617	>1% ≤10%
Zhang et al., 2020	POT	≤3 months	Residues	300-500	8.91	alcaline			60.16	medium			7.25	7.25	7.37	7.02	7.25	7.25	neutral	7.37	7.02	neutral	1:2.5 water		2					ND	3.2617	>1% ≤10%
Zhang et al., 2020	POT	≤3 months	Residues	300-500	9.41	strongly alcaline			27.16	low			7.25	7.25	7.22	7.02	7.25	7.25	neutral	7.22	7.02	neutral	1:2.5 water		0.5					ND	3.2617	>1% ≤10%
Zhang et al., 2020	POT	≤3 months	Residues	300-500	9.41	strongly alcaline			27.16	low			7.25	7.25	7.08	7.02	7.25	7.25	neutral	7.08	7.02	neutral	1:2.5 water		1					ND	3.2617	>1% ≤10%
Zhang et al., 2020	POT	≤3 months	Residues	300-500	9.41	strongly alcaline			27.16	low			7.25	7.25	7.25	7.02	7.25	7.25	neutral	7.25	7.02	neutral	1:2.5 water		2					ND	3.2617	>1% ≤10%
Zhang et al., 2020	POT	≤3 months	Residues	300-500	9.64	strongly alcaline			36.21	low			7.25	7.25	7.57	7.02	7.25	7.25	neutral	7.57	7.02	neutral	1:2.5 water		0.5					ND	3.2617	>1% ≤10%
Zhang et al., 2020	POT	≤3 months	Residues	300-500	9.64	strongly alcaline			36.21	low			7.25	7.25	7.43	7.02	7.25	7.25	neutral	7.43	7.02	neutral	1:2.5 water		1					ND	3.2617	>1% ≤10%
Zhang et al., 2020	POT	≤3 months	Residues	300-500	9.64	strongly alcaline			36.21	low			7.25	7.25	6.5	7.02	7.25	7.25	neutral	6.5	7.02	acid	1:2.5 water		2					ND	3.2617	>1% ≤10%
Zhang et al., 2020	POT	≤3 months	Residues	300-500	9.72	strongly alcaline			46.87	low			7.25	7.25	6.82	7.02	7.25	7.25	neutral	6.82	7.02	neutral	1:2.5 water		0.5					ND	3.2617	>1% ≤10%
Zhang et al., 2020	POT	≤3 months	Residues	300-500	9.72	strongly alcaline			46.87	low			7.25	7.25	7.15	7.02	7.25	7.25	neutral	7.15	7.02	neutral	1:2.5 water		1					ND	3.2617	>1% ≤10%
Zhang et al., 2020	POT	≤3 months	Residues	300-500	9.72	strongly alcaline			46.87	low			7.25	7.25	7.16	7.02	7.25	7.25	neutral	7.16	7.02	neutral	1:2.5 water		2					ND	3.2617	>1% ≤10%
Zhang et al., 2020	POT	≤3 months	Residues	300-500	8.91	alcaline			60.16	medium			6.08	6.08	7.32	7.02	6.08	6.08	acid	7.32	7.02	neutral	1:2.5 water		0.5					ND	3.13495	>1% ≤10%
Zhang et al., 2020	POT	≤3 months	Residues	300-500	8.91	alcaline			60.16	medium			6.08	6.08	7.17	7.02	6.08	6.08	acid	7.17	7.02	neutral	1:2.5 water		1					ND	3.13495	>1% ≤10%
Zhang et al., 2020	POT	≤3 months	Residues	300-500	8.91	alcaline			60.16	medium			6.08	6.08	7.02	7.02	6.08	6.08	acid	7.02	7.02	neutral	1:2.5 water		2					ND	3.13495	>1% ≤10%
Zhang et al., 2020	POT	≤3 months	Residues	300-500	9.41	strongly alcaline			27.16	low			6.08	6.08	7.47	7.02	6.08	6.08	acid	7.47	7.02	neutral	1:2.5 water		0.5					ND	3.13495	>1% ≤10%
Zhang et al., 2020	POT	≤3 months	Residues	300-500	9.41	strongly alcaline			27.16	low			6.08	6.08	7.32	7.02	6.08	6.08	acid	7.32	7.02	neutral	1:2.5 water		1					ND	3.13495	>1% ≤10%
Zhang et al., 2020	POT	≤3 months	Residues	300-500	9.41	strongly alcaline			27.16	low			6.08	6.08	7.47	7.02	6.08	6.08	acid	7.47	7.02	neutral	1:2.5 water		2					ND	3.13495	>1% ≤10%
Zhang et al., 2020	POT	≤3 months	Residues	300-500	9.64	strongly alcaline			36.21	low			6.08	6.08	7.32	7.02	6.08	6.08	acid	7.32	7.02	neutral	1:2.5 water		0.5					ND	3.13495	>1% ≤10%
Zhang et al., 2020	POT	≤3 months	Residues	300-500	9.64	strongly alcaline			36.21	low			6.08	6.08	7.47	7.02	6.08	6.08	acid	7.47	7.02	neutral	1:2.5 water		1					ND	3.13495	>1% ≤10%
Zhang et al., 2020	POT	≤3 months	Residues	300-500	9.64	strongly alcaline			36.21	low			6.08	6.08	7.47	7.02	6.08	6.08	acid	7.47	7.02	neutral	1:2.5 water		2					ND	3.13495	>1% ≤10%
Zhang et al., 2020	POT	≤3 months	Residues	300-500	9.72	strongly alcaline			46.87	low			6.08	6.08	7.32	7.02	6.08	6.08	acid	7.32	7.02	neutral	1:2.5 water		0.5					ND	3.13495	>1% ≤10%
Zhang et al., 2020	POT	≤3 months	Residues	300-500	9.72	strongly alcaline			46.87	low			6.08	6.08	7.17	7.02	6.08	6.08	acid	7.17	7.02	neutral	1:2.5 water		1					ND	3.13495	>1% ≤10%
Zhang et al., 2020	POT	≤3 months	Residues	300-500	9.72	strongly alcaline			46.87	low			6.08	6.08	7.77	7.02	6.08	6.08	acid	7.77	7.02	alcaline	1:2.5 water		2					ND	3.13495	>1% ≤10%
Liu et al., 2020	POT	≤3 months	Residues	300-500								no	5.5	5.5			5.7275	5.7275	acid				1:1 water		5					ND
Liu et al., 2020	POT	≤3 months	Residues	300-500								no	5.5	5.5			5.7275	5.7275	acid				1:1 water		5					ND
Alvarez et al., 2020	INCUBATION	> 3 months ≤1 year	Manure	300-500	10.07	strongly alcaline	470	medium	4.28	low	Fine	no	4.68	4.68	8.44	5.81	4.68	4.68	acid	8.44	5.81	alcaline	1:2.5 water		10	0.06	low	2.23	low	ND	1.34	>1% ≤10%			CO2							7.65432	0.358972	3	1.97531	0.201246	3
Alvarez et al., 2020	INCUBATION	> 3 months ≤1 year	Manure	501-700	10.73	strongly alcaline	500	medium	7.03	low	Fine	no	4.68	4.68	8.46	5.81	4.68	4.68	acid	8.46	5.81	alcaline	1:2.5 water		10	0.06	low	2.24	low	ND	1.34	>1% ≤10%			CO2							3.7037	0.0938406	3	1.97531	0.201246	3
Alvarez et al., 2020	INCUBATION	> 3 months ≤1 year	Manure	300-500	10.59	strongly alcaline	400	medium	5.68	low	Fine	no	4.68	4.68	8.07	5.81	4.68	4.68	acid	8.07	5.81	alcaline	1:2.5 water		10	0.06	low	1.61	low	ND	1.34	>1% ≤10%			CO2							6.91358	0.154353	3	1.97531	0.201246	3
Alvarez et al., 2020	INCUBATION	> 3 months ≤1 year	Manure	501-700	10.88	strongly alcaline	470	medium	35.97	low	Fine	no	4.68	4.68	8.21	5.81	4.68	4.68	acid	8.21	5.81	alcaline	1:2.5 water		10	0.06	low	1.65	low	ND	1.34	>1% ≤10%			CO2							4.69136	0.171108	3	1.97531	0.201246	3
Alvarez et al., 2020	INCUBATION	> 3 months ≤1 year	Manure	300-500	10.07	strongly alcaline	470	medium	4.28	low	Coarse	no	4.34	4.34	9.43	5.1	4.34	4.34	strongly acid	9.43	5.1	strongly alcaline	1:2.5 water		10	0.09	low	2.29	low	ND	0.22	≤1%			CO2							5.67901	0.462949	3	2.22222	0.234811	3
Alvarez et al., 2020	INCUBATION	> 3 months ≤1 year	Manure	501-700	10.73	strongly alcaline	500	medium	7.03	low	Coarse	no	4.34	4.34	9.18	5.1	4.34	4.34	strongly acid	9.18	5.1	strongly alcaline	1:2.5 water		10	0.09	low	2.5	low	ND	0.22	≤1%			CO2							2.22222	0.197928	3	2.22222	0.234811	3
Alvarez et al., 2020	INCUBATION	> 3 months ≤1 year	Manure	300-500	10.59	strongly alcaline	400	medium	5.68	low	Coarse	no	4.34	4.34	7.73	5.1	4.34	4.34	strongly acid	7.73	5.1	alcaline	1:2.5 water		10	0.09	low	2.05	low	ND	0.22	≤1%			CO2							3.7037	0.238166	3	2.22222	0.234811	3
Alvarez et al., 2020	INCUBATION	> 3 months ≤1 year	Manure	501-700	10.88	strongly alcaline	470	medium	35.97	low	Coarse	no	4.34	4.34	7.97	5.1	4.34	4.34	strongly acid	7.97	5.1	alcaline	1:2.5 water		10	0.09	low	2.25	low	ND	0.22	≤1%			CO2							3.7037	0.791729	3	2.22222	0.234811	3
Alvarez et al., 2020	INCUBATION	> 3 months ≤1 year	Manure	300-500	10.07	strongly alcaline	470	medium	4.28	low	Coarse	no	3.63	3.63	7.29	3.86	3.63	3.63	strongly acid	7.29	3.86	neutral	1:2.5 water		10	0.22	low	3.49	low	ND	0.1	≤1%			CO2							5.4321	0.214719	3	3.7037	0.714552	3
Alvarez et al., 2020	INCUBATION	> 3 months ≤1 year	Manure	501-700	10.73	strongly alcaline	500	medium	7.03	low	Coarse	no	3.63	3.63	7.66	3.86	3.63	3.63	strongly acid	7.66	3.86	alcaline	1:2.5 water		10	0.22	low	3.61	low	ND	0.1	≤1%			CO2							2.46914	0.0469476	3	3.7037	0.714552	3
Alvarez et al., 2020	INCUBATION	> 3 months ≤1 year	Manure	300-500	10.59	strongly alcaline	400	medium	5.68	low	Coarse	no	3.63	3.63	8.13	3.86	3.63	3.63	strongly acid	8.13	3.86	alcaline	1:2.5 water		10	0.22	low	2.94	low	ND	0.1	≤1%			CO2							4.69136	0.0805128	3	3.7037	0.714552	3
Alvarez et al., 2020	INCUBATION	> 3 months ≤1 year	Manure	501-700	10.88	strongly alcaline	470	medium	35.97	low	Coarse	no	3.63	3.63	8.08	3.86	3.63	3.63	strongly acid	8.08	3.86	alcaline	1:2.5 water		10	0.22	low	2.75	low	ND	0.1	≤1%			CO2							2.46914	0.150998	3	3.7037	0.714552	3
Alvarez et al., 2020	INCUBATION	> 3 months ≤1 year	Manure	300-500	10.07	strongly alcaline	470	medium	4.28	low	Coarse	no	5.67	5.67	7.96	7.91	5.67	5.67	acid	7.96	5.67	alcaline	1:2.5 water		10	0.49	low	3.11	low	ND	1.73	>1% ≤10%			CO2							11.8519	0.187576	3	8.64198	0.676167	3
Alvarez et al., 2020	INCUBATION	> 3 months ≤1 year	Manure	501-700	10.73	strongly alcaline	500	medium	7.03	low	Coarse	no	5.67	5.67	7.59	7.91	5.67	5.67	acid	7.59	5.67	neutral	1:2.5 water		10	0.49	low	3.14	low	ND	1.73	>1% ≤10%			CO2							7.90123	1.72751	3	8.64198	0.676167	3
Alvarez et al., 2020	INCUBATION	> 3 months ≤1 year	Manure	300-500	10.59	strongly alcaline	400	medium	5.68	low	Coarse	no	5.67	5.67	7.49	7.91	5.67	5.67	acid	7.49	5.67	neutral	1:2.5 water		10	0.49	low	3.05	low	ND	1.73	>1% ≤10%			CO2							8.88889	0.117778	3	8.64198	0.676167	3
Alvarez et al., 2020	INCUBATION	> 3 months ≤1 year	Manure	501-700	10.88	strongly alcaline	470	medium	35.97	low	Coarse	no	5.67	5.67	7.43	7.91	5.67	5.67	acid	7.43	5.67	neutral	1:2.5 water		10	0.49	low	2.43	low	ND	1.73	>1% ≤10%			CO2							7.90123	0.191946	3	8.64198	0.676167	3
Alvarez et al., 2020	INCUBATION	> 3 months ≤1 year	Manure	300-500	10.07	strongly alcaline	470	medium	4.28	low	Coarse	no	7.3	7.3	8.57	7.24	7.3	7.3	neutral	8.57	7.24	alcaline	1:2.5 water		10	0.25	low	2.44	low	ND	1.83	>1% ≤10%			CO2							11.8519	1.56176	3	8.39506	0.388255	3
Alvarez et al., 2020	INCUBATION	> 3 months ≤1 year	Manure	501-700	10.73	strongly alcaline	500	medium	7.03	low	Coarse	no	7.3	7.3	8.05	7.24	7.3	7.3	neutral	8.05	7.24	alcaline	1:2.5 water		10	0.25	low	2.7	low	ND	1.83	>1% ≤10%			CO2							9.87654	0.231208	3	8.39506	0.388255	3
Alvarez et al., 2020	INCUBATION	> 3 months ≤1 year	Manure	300-500	10.59	strongly alcaline	400	medium	5.68	low	Coarse	no	7.3	7.3	7.71	7.24	7.3	7.3	neutral	7.71	7.24	alcaline	1:2.5 water		10	0.25	low	1.58	low	ND	1.83	>1% ≤10%			CO2							10.3704	0.26176	3	8.39506	0.388255	3
Alvarez et al., 2020	INCUBATION	> 3 months ≤1 year	Manure	501-700	10.88	strongly alcaline	470	medium	35.97	low	Coarse	no	7.3	7.3	8.67	7.24	7.3	7.3	neutral	8.67	7.24	alcaline	1:2.5 water		10	0.25	low	1.73	low	ND	1.83	>1% ≤10%			CO2							7.90123	1.32618	3	8.39506	0.388255	3
Alvarez et al., 2020	INCUBATION	> 3 months ≤1 year	Manure	300-500	10.07	strongly alcaline	470	medium	4.28	low	Fine	no	5.84	5.84	9.3	8.23	5.84	5.84	acid	9.3	8.23	strongly alcaline	1:2.5 water		10	0.23	low	1.8	low	ND	5.38	>1% ≤10%			CO2							8.88889	1.28691	3	6.41975	0.837592	3
Alvarez et al., 2020	INCUBATION	> 3 months ≤1 year	Manure	501-700	10.73	strongly alcaline	500	medium	7.03	low	Fine	no	5.84	5.84	8.88	8.23	5.84	5.84	acid	8.88	8.23	alcaline	1:2.5 water		10	0.23	low	1.72	low	ND	5.38	>1% ≤10%			CO2							5.4321	0.109068	3	6.41975	0.837592	3
Alvarez et al., 2020	INCUBATION	> 3 months ≤1 year	Manure	300-500	10.59	strongly alcaline	400	medium	5.68	low	Fine	no	5.84	5.84	9.04	8.23	5.84	5.84	acid	9.04	8.23	strongly alcaline	1:2.5 water		10	0.23	low	2.13	low	ND	5.38	>1% ≤10%			CO2							6.91358	0.200679	3	6.41975	0.837592	3
Alvarez et al., 2020	INCUBATION	> 3 months ≤1 year	Manure	501-700	10.88	strongly alcaline	470	medium	35.97	low	Fine	no	5.84	5.84	9.18	8.23	5.84	5.84	acid	9.18	8.23	strongly alcaline	1:2.5 water		10	0.23	low	1.73	low	ND	5.38	>1% ≤10%			CO2							5.4321	1.09932	3	6.41975	0.837592	3
Alvarez et al., 2020	INCUBATION	> 3 months ≤1 year	Manure	300-500	10.07	strongly alcaline	470	medium	4.28	low	Fine	no	8.16	8.16	8.63	8.42	8.16	8.16	alcaline	8.63	8.42	alcaline	1:2.5 water		10	0.19	low	2.21	low	ND	0.78	≤1%			CO2							12.3457	0.461578	3	9.38272	0.492929	3
Alvarez et al., 2020	INCUBATION	> 3 months ≤1 year	Manure	501-700	10.73	strongly alcaline	500	medium	7.03	low	Fine	no	8.16	8.16	8.82	8.42	8.16	8.16	alcaline	8.82	8.42	alcaline	1:2.5 water		10	0.19	low	2.35	low	ND	0.78	≤1%			CO2							11.8519	0.215097	3	9.38272	0.492929	3
Alvarez et al., 2020	INCUBATION	> 3 months ≤1 year	Manure	300-500	10.59	strongly alcaline	400	medium	5.68	low	Fine	no	8.16	8.16	8.63	8.42	8.16	8.16	alcaline	8.63	8.42	alcaline	1:2.5 water		10	0.19	low	2	low	ND	0.78	≤1%			CO2							12.3457	0.174774	3	9.38272	0.492929	3
Alvarez et al., 2020	INCUBATION	> 3 months ≤1 year	Manure	501-700	10.88	strongly alcaline	470	medium	35.97	low	Fine	no	8.16	8.16	8.72	8.72	8.16	8.16	alcaline	8.72	8.72	alcaline	1:2.5 water		10	0.19	low	1.46	low	ND	0.78	≤1%			CO2							6.17284	0.506373	3	9.38272	0.492929	3
Alvarez et al., 2020	INCUBATION	> 3 months ≤1 year	Manure	300-500	10.07	strongly alcaline	470	medium	4.28	low	Fine	no	8.09	8.16	7.5	8.72	8.09	8.16	alcaline	7.5	8.72	neutral	1:2.5 water		10	0.35	low	3.43	low	ND	0.92	≤1%			CO2							7.90123	0.394327	3	6.41975	0.143398	3
Alvarez et al., 2020	INCUBATION	> 3 months ≤1 year	Manure	501-700	10.73	strongly alcaline	500	medium	7.03	low	Fine	no	8.09	8.16	7.86	8.72	8.09	8.16	alcaline	7.86	8.72	alcaline	1:2.5 water		10	0.35	low	2.93	low	ND	0.92	≤1%			CO2							6.91358	0.362991	3	6.41975	0.143398	3
Alvarez et al., 2020	INCUBATION	> 3 months ≤1 year	Manure	300-500	10.59	strongly alcaline	400	medium	5.68	low	Fine	no	8.09	8.16	7.76	8.72	8.09	8.16	alcaline	7.76	8.72	alcaline	1:2.5 water		10	0.35	low	2.42	low	ND	0.92	≤1%			CO2							6.79012	0.425704	3	6.41975	0.143398	3
Alvarez et al., 2020	INCUBATION	> 3 months ≤1 year	Manure	501-700	10.88	strongly alcaline	470	medium	35.97	low	Fine	no	8.09	8.16	7.6	8.72	8.09	8.16	alcaline	7.6	8.72	alcaline	1:2.5 water		10	0.35	low	2.57	low	ND	0.92	≤1%			CO2							7.90123	0.47498	3	6.41975	0.143398	3
Alvarez et al., 2020	INCUBATION	> 3 months ≤1 year	Manure	300-500	10.07	strongly alcaline	470	medium	4.28	low	Coarse	no	7.9	7.9	8.65	7.69	7.9	7.9	alcaline	8.65	7.69	alcaline	1:2.5 water		10	1.49	low	3.95	low	ND	0.39	≤1%			CO2							8.88889	0.452599	3	7.40741	0.439139	3
Alvarez et al., 2020	INCUBATION	> 3 months ≤1 year	Manure	501-700	10.73	strongly alcaline	500	medium	7.03	low	Coarse	no	7.9	7.9	8.19	7.69	7.9	7.9	alcaline	8.19	7.69	alcaline	1:2.5 water		10	1.49	low	5.21	low	ND	0.39	≤1%			CO2							12.3457	0.336089	3	7.40741	0.439139	3
Alvarez et al., 2020	INCUBATION	> 3 months ≤1 year	Manure	300-500	10.59	strongly alcaline	400	medium	5.68	low	Coarse	no	7.9	7.9	7.91	7.69	7.9	7.9	alcaline	7.91	7.69	alcaline	1:2.5 water		10	1.49	low	3.7	low	ND	0.39	≤1%			CO2							11.8519	0.156833	3	7.40741	0.439139	3
Alvarez et al., 2020	INCUBATION	> 3 months ≤1 year	Manure	501-700	10.88	strongly alcaline	470	medium	35.97	low	Coarse	no	7.9	7.9	8.03	7.69	7.9	7.9	alcaline	8.03	7.69	alcaline	1:2.5 water		10	1.49	low	3.92	low	ND	0.39	≤1%			CO2							10.3704	0.120992	3	7.40741	0.439139	3
Alvarez et al., 2020	INCUBATION	> 3 months ≤1 year	Manure	300-500	10.07	strongly alcaline	470	medium	4.28	low	Coarse	no	7.89	7.89	8.02	7.57	7.89	7.89	alcaline	8.02	7.57	alcaline	1:2.5 water		10	2.24	low	5.41	low	ND	0.25	≤1%			CO2							9.1358	0.380892	3	7.16049	0.466042	3
Alvarez et al., 2020	INCUBATION	> 3 months ≤1 year	Manure	501-700	10.73	strongly alcaline	500	medium	7.03	low	Coarse	no	7.89	7.89	8.22	7.57	7.89	7.89	alcaline	8.22	7.57	alcaline	1:2.5 water		10	2.24	low	5.36	low	ND	0.25	≤1%			CO2							4.93827	0.40329	3	7.16049	0.466042	3
Alvarez et al., 2020	INCUBATION	> 3 months ≤1 year	Manure	300-500	10.59	strongly alcaline	400	medium	5.68	low	Coarse	no	7.89	7.89	8.59	7.57	7.89	7.89	alcaline	8.59	7.57	alcaline	1:2.5 water		10	2.24	low	4.48	low	ND	0.25	≤1%			CO2							6.17284	0.488456	3	7.16049	0.466042	3
Alvarez et al., 2020	INCUBATION	> 3 months ≤1 year	Manure	501-700	10.88	strongly alcaline	470	medium	35.97	low	Coarse	no	7.89	7.89	8.1	7.57	7.89	7.89	alcaline	8.1	7.57	alcaline	1:2.5 water		10	2.24	low	4.1	low	ND	0.25	≤1%			CO2							5.18519	0.318155	3	7.16049	0.466042	3
Tu et al., 2020	POT	≤3 months	Straw	300-500	9.6	strongly alcaline					Coarse	No	7.85	7.85	7.6	7.6	8.00935	8.00935	alcaline	7.7666	7.7666	alcaline	1:1 water		1					ND	0.46632	≤1%
Tu et al., 2020	POT	≤3 months	Straw	300-500	9.6	strongly alcaline					Coarse	No	7.85	7.85	7.6	7.6	8.00935	8.00935	alcaline	7.7666	7.7666	alcaline	1:1 water		5					ND	0.46632	≤1%
Tu et al., 2020	POT	≤3 months	Straw	300-500	9.6	strongly alcaline					Coarse	No	7.85	7.85	7.4	7.6	8.00935	8.00935	alcaline	7.5724	7.7666	neutral	1:1 water		1					ND	0.46632	≤1%
Tu et al., 2020	POT	≤3 months	Straw	300-500	9.6	strongly alcaline					Coarse	No	7.85	7.85	7.2	7.6	8.00935	8.00935	alcaline	7.3782	7.7666	neutral	1:1 water		5					ND	0.46632	≤1%
Qin et al., 2020	POT	≤3 months	Straw		8.5	alcaline			62.1	medium	Coarse	no	5.4	5.4	5.62	5.41	5.4	5.4	acid	5.62	5.41	acid	1:2.5 water		2	200	medium			ND
Qin et al., 2020	POT	≤3 months	Straw		8.5	alcaline			62.1	medium	Coarse	no	5.4	5.4	6.3	5.41	5.4	5.4	acid	6.3	5.41	acid	1:2.5 water		5	200	medium			ND
Qin et al., 2020	POT	> 3 months ≤1 year	Straw		8.5	alcaline			62.1	medium	Coarse	no	5.4	5.4	5.13	5.3	5.4	5.4	acid	5.13	5.3	acid	1:2.5 water		2	200	medium			ND	2.01	>1% ≤10%
Qin et al., 2020	POT	> 3 months ≤1 year	Straw		8.5	alcaline			62.1	medium	Coarse	no	5.4	5.4	5.31	5.3	5.4	5.4	acid	5.31	5.3	acid	1:2.5 water		5	200	medium			ND	2.01	>1% ≤10%
Liu et al., 2020	POT	≤3 months	Straw	300-500	8.23	alcaline			1331	high	Medium	yes	8.5	8.5			8.44444	8.44444	alcaline				1:5 water		0.2					ND	0.00157644	≤1%
Liu et al., 2020	POT	≤3 months	Straw	300-500	8.23	alcaline			1331	high	Medium	yes	8.5	8.5			8.44444	8.44444	alcaline				1:5 water		0.5					ND	0.00157644	≤1%
Liu et al., 2020	POT	≤3 months	Straw	300-500	8.23	alcaline			1331	high	Medium	yes	8.5	8.5			8.44444	8.44444	alcaline				1:5 water		1					ND	0.00157644	≤1%
Meier et al., 2019c	POT	≤3 months	Manure	300-500	9.1	strongly alcaline	924	Medium	11.51	low	Coarse	no	5.29	5.29	6.7	5.8	5.52359	5.52359	acid	6.8927	6.0188	neutral	ND		3					ND	1.74	>1% ≤10%
Meier et al., 2019c	POT	≤3 months	Residues	300-500	7.81	alcaline	789	Medium	0.16	low	Coarse	no	5.29	5.29	6.1	5.8	5.52359	5.52359	acid	6.3101	6.0188	acid	ND		3					ND	1.74	>1% ≤10%
Meier et al., 2019c	POT	≤3 months	Wood	501-700	9.2	strongly alcaline	724	Medium	1.3	low	Coarse	no	5.29	5.29	6.2	5.8	5.52359	5.52359	acid	6.4072	6.0188	acid	ND		3					ND	1.74	>1% ≤10%
Frick et al., 2018		≤3 months	Grass	>700	10.1	strongly alcaline					Medium	No	6.4	6.4			6.4	6.4	acid				1:2.5 water		1					ND	2.3	>1% ≤10%
Frick et al., 2018		≤3 months	Grass	>700	10.1	strongly alcaline					Medium	no	6.4	6.4			6.4	6.4	acid				1:2.5 water		1					ND	2.3	>1% ≤10%
Frick et al., 2018		≤3 months	Grass	>700	10.1	strongly alcaline					Medium	no	6.4	6.4			6.4	6.4	acid				1:2.5 water		1					ND	2.3	>1% ≤10%
Frick et al., 2018		≤3 months	Grass	>700	10.1	strongly alcaline					Medium	no	6.4	6.4			6.4	6.4	acid				1:2.5 water		1					ND	2.3	>1% ≤10%
Li et al., 2018	POT	≤3 months	Grass	501-700	7.13	neutral	10.48	low	268.35	high	Fine	no	7.62	7.62	7.35	7.68	7.55556	7.55556	neutral	7.28283	7.61616	neutral	1:5 water		1	282	medium	317.23	medium	ND	1.7745	>1% ≤10%
Gao & DeLuca, 2018	FIELD		Wood	300-500	6.92	neutral					Coarse	yes	6.42	6.42	6.92	6.45	6.62082	6.62082	neutral	7.10632	6.64995	neutral	1:1 water	20						total carbon			2.99721	>1% ≤10%
Gao & DeLuca, 2018	FIELD		Wood	300-500	6.92	neutral					Coarse	yes	6.42	6.42	6.83	6.45	6.62082	6.62082	neutral	7.01893	6.64995	neutral	1:1 water	20						total carbon			3.15185	>1% ≤10%
Strachel et al., 2018	POT	≤3 months	Residues		9	alcaline					Fine	yes	5.77	6.3	6.3	6.65	6.6366	7.10529	neutral	7.10529	7.41481	neutral	1:1 KCl		2.5					ND	1	>1% ≤10%
Wawra et al., 2018	POT	>1 year ≤2 years	Grass	300-500	8.77	alcaline					Medium	no	6.5	6.5	7.1	6.6	7.18182	7.18182	neutral	7.7747	7.28063	alcaline	1:5 0.01 M CaCl2		3			52	low	organic carbon	3.4	>1% ≤10%
Wawra et al., 2018	POT	>1 year ≤2 years	Grass	300-500	8.77	alcaline					Medium	yes	6.5	6.5	7	6.6	7.18182	7.18182	neutral	7.67589	7.28063	alcaline	1:5 0.01 M CaCl2		3			53.7	low	organic carbon	3.3	>1% ≤10%
Yang et al., 2018	POT	> 3 months ≤1 year	Straw		9.98	strongly alcaline					Fine	yes	6.68	6.68	6.52	6.62	6.87328	6.87328	neutral	6.71792	6.81502	neutral	ND		1					ND	2.3954	>1% ≤10%
Yang et al., 2018	POT	> 3 months ≤1 year	Straw		9.98	strongly alcaline					Fine	yes	6.68	6.68	6.56	6.62	6.87328	6.87328	neutral	6.75676	6.81502	neutral	ND		2					ND	2.3954	>1% ≤10%
Yang et al., 2018	POT	> 3 months ≤1 year	Straw		9.98	strongly alcaline					Fine	yes	6.68	6.68	6.44	6.62	6.87328	6.87328	neutral	6.64024	6.81502	neutral	ND		4					ND	2.3954	>1% ≤10%
Xu et al., 2017	POT	≤3 months	Residues	300-500	10.29	strongly alcaline	0.17	low	202.49	high	Medium	no	6.26	6.26			6.18182	6.18182	acid				1:5 water		5	27.53	low			ND	1.93505	>1% ≤10%
Xu et al., 2017	POT	≤3 months	Residues	300-500	10.29	strongly alcaline	0.17	low	202.49	high	Medium	no	6.26	6.26			6.18182	6.18182	acid				1:5 water		5	27.53	low			ND	1.93505	>1% ≤10%
Xu et al., 2017	POT	≤3 months	Residues	300-500	10.29	strongly alcaline	0.17	low	202.49	high	Medium	no	6.26	6.26			6.18182	6.18182	acid				1:5 water		5	27.53	low			ND	1.93505	>1% ≤10%
Xu et al., 2017	POT	≤3 months	Residues	300-500	10.29	strongly alcaline	0.17	low	202.49	high	Medium	no	6.26	6.26			6.18182	6.18182	acid				1:5 water		5	27.53	low			ND	1.93505	>1% ≤10%
Mierzwa-Hersztek et al., 2017	POT	> 3 months ≤1 year	Sludge	300-500	6.89	neutral	44.8	low	24.9	low	Medium	no	4.6	4.6	4.77	4.65	5.3784	5.3784	acid	5.53267	5.42377	acid	1:2.5 KCl		0.5			102	medium	total carbon	0.3549	≤1%	0.40222	≤1%
Mierzwa-Hersztek et al., 2017	POT	> 3 months ≤1 year	Sludge	300-500	6.89	neutral	44.8	low	24.9	low	Medium	no	4.6	4.6	4.92	4.65	5.3784	5.3784	acid	5.66878	5.42377	acid	1:2.5 KCl		1			273	medium	total carbon	0.3549	≤1%	0.45968	≤1%
Mierzwa-Hersztek et al., 2017	POT	> 3 months ≤1 year	Sludge	300-500	6.89	neutral	44.8	low	24.9	low	Medium	no	4.6	4.6	5.16	4.65	5.3784	5.3784	acid	5.88657	5.42377	acid	1:2.5 KCl		2			386	medium	total carbon	0.3549	≤1%	0.506155	≤1%
Mierzwa-Hersztek et al., 2017	POT	> 3 months ≤1 year	Sludge	300-500	7.06	neutral	6.7	low	11.9	low	Medium	no	4.6	4.6	4.96	4.65	5.3784	5.3784	acid	5.70508	5.42377	acid	1:2.5 KCl		0.5			52.3	low	total carbon	0.3549	≤1%	0.40222	≤1%
Mierzwa-Hersztek et al., 2017	POT	> 3 months ≤1 year	Sludge	300-500	7.06	neutral	6.7	low	11.9	low	Medium	no	4.6	4.6	5.26	4.65	5.3784	5.3784	acid	5.97731	5.42377	acid	1:2.5 KCl		1			52.1	low	total carbon	0.3549	≤1%	0.43771	≤1%
Mierzwa-Hersztek et al., 2017	POT	> 3 months ≤1 year	Sludge	300-500	7.06	neutral	6.7	low	11.9	low	Medium	no	4.6	4.6	5.71	4.65	5.3784	5.3784	acid	6.38566	5.42377	acid	1:2.5 KCl		2			64.2	low	total carbon	0.3549	≤1%	0.46982	≤1%
Mierzwa-Hersztek et al., 2017	POT	> 3 months ≤1 year	Sludge	300-500	7.18	neutral	5	low	2.2	low	Medium	no	4.6	4.6	5.05	4.65	5.3784	5.3784	acid	5.78675	5.42377	acid	1:2.5 KCl		0.5			42.6	low	total carbon	0.3549	≤1%	0.389545	≤1%
Mierzwa-Hersztek et al., 2017	POT	> 3 months ≤1 year	Sludge	300-500	7.18	neutral	5	low	2.2	low	Medium	no	4.6	4.6	5.45	4.65	5.3784	5.3784	acid	6.14973	5.42377	acid	1:2.5 KCl		1			49.3	low	total carbon	0.3549	≤1%	0.45461	≤1%
Mierzwa-Hersztek et al., 2017	POT	> 3 months ≤1 year	Sludge	300-500	7.18	neutral	5	low	2.2	low	Medium	no	4.6	4.6	6.09	4.65	5.3784	5.3784	acid	6.73049	5.42377	neutral	1:2.5 KCl		2			64.2	low	total carbon	0.3549	≤1%	0.55601	≤1%
Wawra et al., 2017	POT	> 3 months ≤1 year	Grass	300-500	8.77	alcaline					Medium	no	7.5	7.5			8.20388	8.20388	alcaline				1:1 CaCl2		3					ND
Wawra et al., 2017	POT	> 3 months ≤1 year	Grass	300-500	8.77	alcaline					Medium	no	7.5	7.5			8.20388	8.20388	alcaline				1:1 CaCl2		1.5					ND
Moore et al., 2017	POT	> 3 months ≤1 year	Residues	300-500	7.8	alcaline	789	Medium	0.16	low	Coarse	no	5.29	5.29	6.57	5.35	5.29	5.29	acid	6.57	5.35	acid	1:2.5 water		1					ND	1.74	>1% ≤10%
Moore et al., 2017	POT	> 3 months ≤1 year	Residues	300-500	7.8	alcaline	789	Medium	0.16	low	Coarse	no	5.29	5.29	7.04	5.35	5.29	5.29	acid	7.04	5.35	neutral	1:2.5 water		5					ND	1.74	>1% ≤10%
Moore et al., 2017	POT	> 3 months ≤1 year	Manure	300-500	9.1	strongly alcaline	924	Medium	11.51	low	Coarse	no	5.29	5.29	6.29	5.35	5.29	5.29	acid	6.29	5.35	acid	1:2.5 water		1					ND	1.74	>1% ≤10%
Moore et al., 2017	POT	> 3 months ≤1 year	Manure	300-500	9.1	strongly alcaline	924	Medium	11.51	low	Coarse	no	5.29	5.29	6.45	5.35	5.29	5.29	acid	6.45	5.35	acid	1:2.5 water		5					ND	1.74	>1% ≤10%
Moore et al., 2017	POT	> 3 months ≤1 year	Residues	300-500	7.8	alcaline	789	Medium	0.16	low	Coarse	no	5.29	5.29	6.1	5.21	5.29	5.29	acid	6.1	5.21	acid	1:2.5 water		1					ND	1.74	>1% ≤10%
Moore et al., 2017	POT	> 3 months ≤1 year	Residues	300-500	7.8	alcaline	789	Medium	0.16	low	Coarse	no	5.29	5.29	7.31	5.21	5.29	5.29	acid	7.31	5.21	neutral	1:2.5 water		5					ND	1.74	>1% ≤10%
Moore et al., 2017	POT	> 3 months ≤1 year	Manure	300-500	9.1	strongly alcaline	924	Medium	11.51	low	Coarse	no	5.29	5.29	6.73	5.21	5.29	5.29	acid	6.73	5.21	neutral	1:2.5 water		1					ND	1.74	>1% ≤10%
Moore et al., 2017	POT	> 3 months ≤1 year	Manure	300-500	9.1	strongly alcaline	924	Medium	11.51	low	Coarse	no	5.29	5.29	6.97	5.21	5.29	5.29	acid	6.97	5.21	neutral	1:2.5 water		5					ND	1.74	>1% ≤10%
Moore et al., 2017	POT	> 3 months ≤1 year	Residues	300-500	7.8	alcaline	789	Medium	0.16	low	Coarse	no	5.29	5.29	6.3	5.32	5.29	5.29	acid	6.3	5.32	acid	1:2.5 water		1					ND	1.74	>1% ≤10%
Moore et al., 2017	POT	> 3 months ≤1 year	Residues	300-500	7.8	alcaline	789	Medium	0.16	low	Coarse	no	5.29	5.29	7.36	5.32	5.29	5.29	acid	7.36	5.32	neutral	1:2.5 water		5					ND	1.74	>1% ≤10%
Moore et al., 2017	POT	> 3 months ≤1 year	Manure	300-500	9.1	strongly alcaline	924	Medium	11.51	low	Coarse	no	5.29	5.29	6.45	5.32	5.29	5.29	acid	6.45	5.32	acid	1:2.5 water		1					ND	1.74	>1% ≤10%
Moore et al., 2017	POT	> 3 months ≤1 year	Manure	300-500	9.1	strongly alcaline	924	Medium	11.51	low	Coarse	no	5.29	5.29	6.99	5.32	5.29	5.29	acid	6.99	5.32	neutral	1:2.5 water		5					ND	1.74	>1% ≤10%
Moore et al., 2017	POT	> 3 months ≤1 year	Residues	300-500	7.8	alcaline	789	Medium	0.16	low	Coarse	no	5.29	5.29	6.13	5.3	5.29	5.29	acid	6.13	5.3	acid	1:2.5 water		1					ND	1.74	>1% ≤10%
Moore et al., 2017	POT	> 3 months ≤1 year	Residues	300-500	7.8	alcaline	789	Medium	0.16	low	Coarse	no	5.29	5.29	7.37	5.3	5.29	5.29	acid	7.37	5.3	neutral	1:2.5 water		5					ND	1.74	>1% ≤10%
Moore et al., 2017	POT	> 3 months ≤1 year	Manure	300-500	9.1	strongly alcaline	924	Medium	11.51	low	Coarse	no	5.29	5.29	6.33	5.3	5.29	5.29	acid	6.33	5.3	acid	1:2.5 water		1					ND	1.74	>1% ≤10%
Moore et al., 2017	POT	> 3 months ≤1 year	Manure	300-500	9.1	strongly alcaline	924	Medium	11.51	low	Coarse	no	5.29	5.29	6.96	5.3	5.29	5.29	acid	6.96	5.3	neutral	1:2.5 water		5					ND	1.74	>1% ≤10%
Kaurin et al., 2017	POT	> 3 months ≤1 year			8.8	alcaline					Coarse	yes	6.8		7.1		7.33683		neutral	7.62309		alcaline	1:2.5 0.01 M CaCl2		0.75					organic carbon	5	>1% ≤10%
Kaurin et al., 2017	POT	> 3 months ≤1 year			8.8	alcaline					Medium	yes	5.1		5.9		5.71469		acid	6.47805		acid	1:2.5 0.01 M CaCl2		0.75					organic carbon	2.8	>1% ≤10%
Soja et al., 2017	POT	> 3 months ≤1 year	Wood	300-500	8.5	alcaline	392	medium			Coarse	no	7.2	7.2	6.89	7.2	7.92188	7.92188	alcaline	7.63049	7.92188	alcaline	1:1 CaCl2	10						ND	0.9	≤1%
Soja et al., 2017	POT	> 3 months ≤1 year	Wood	300-500	8.5	alcaline	392	medium			Coarse	no	7.2	7.2	6.95	7.2	7.92188	7.92188	alcaline	7.68689	7.92188	alcaline	1:1 CaCl2	30						ND	0.9	≤1%
Soja et al., 2017	POT	> 3 months ≤1 year	Wood	300-500	2.6	strongly acid	1298	high			Coarse	no	7.2	7.2	6.9	7.2	7.92188	7.92188	alcaline	7.63989	7.92188	alcaline	1:1 CaCl2	30						ND	0.9	≤1%
Soja et al., 2017	POT	> 3 months ≤1 year	Wood	300-500	2.7	strongly acid	1504	high			Coarse	no	7.2	7.2	6.95	7.2	7.92188	7.92188	alcaline	7.68689	7.92188	alcaline	1:1 CaCl2	30						ND	0.9	≤1%
Soja et al., 2017	POT	> 3 months ≤1 year	Wood	300-500	2.7	strongly acid	1504	high			Coarse	no	7.2	7.2	6.94	7.2	7.92188	7.92188	alcaline	7.67749	7.92188	alcaline	1:1 CaCl2	60						ND	0.9	≤1%
Soja et al., 2017	POT	> 3 months ≤1 year	Wood	300-500	2.7	strongly acid	1504	high			Coarse	no	7.2	7.2	6.95	7.2	7.92188	7.92188	alcaline	7.68689	7.92188	alcaline	1:1 CaCl2	40						ND	0.9	≤1%
Soja et al., 2017	POT	> 3 months ≤1 year	Wood	300-500	8.5	alcaline	392	medium			Coarse	no	6.2	6.2	6.71	6.2	6.9819	6.9819	acid	7.46129	6.9819	neutral	1:1 CaCl2	30						ND	2.7	>1% ≤10%
Soja et al., 2017	POT	> 3 months ≤1 year	Wood	300-500	2.6	strongly acid	1298	high			Coarse	no	6.2	6.2	6.67	6.2	6.9819	6.9819	acid	7.4237	6.9819	neutral	1:1 CaCl2	30						ND	2.7	>1% ≤10%
Soja et al., 2017	POT	> 3 months ≤1 year	Wood	300-500	2.7	strongly acid	1504	high			Coarse	no	6.2	6.2	6.75	6.2	6.9819	6.9819	acid	7.49889	6.9819	neutral	1:1 CaCl2	30						ND	2.7	>1% ≤10%
Soja et al., 2017	POT	> 3 months ≤1 year	Wood	300-500	2.7	strongly acid	1504	high			Coarse	no	6.2	6.2	6.79	6.2	6.9819	6.9819	acid	7.53649	6.9819	neutral	1:1 CaCl2	60						ND	2.7	>1% ≤10%
Soja et al., 2017	POT	> 3 months ≤1 year	Wood	300-500	2.7	strongly acid	1504	high			Coarse	no	6.2	6.2	6.51	6.2	6.9819	6.9819	acid	7.2733	6.9819	neutral	1:1 CaCl2	40						ND	2.7	>1% ≤10%
Moreno-Barriga et al., 2017	POT	> 3 months ≤1 year	Manure	300-500	10.52	strongly alcaline	3990	high			Coarse	no	2.82	2.82	7.9	3	2.82	2.82	strongly acid	7.9	3	alcaline	1:2.5 water		0.5	7.2	low	2700	high	total carbon	0.084	≤1%	0.845	≤1%	CH4, CO2, N2O	0.414568	0.0144149	3	0.504691	0.0305257	3	9.46296	0.601268	3	10.3642	1.1478	3	0.00495679	0.00280067
Moreno-Barriga et al., 2017	POT	> 3 months ≤1 year	Manure	300-500	10.52	strongly alcaline	3990	high			Coarse	no	2.82	2.82	7.95	3	2.82	2.82	strongly acid	7.95	3	alcaline	1:2.5 water		1	7.2	low	3000	high	total carbon	0.084	≤1%	1.47875	>1% ≤10%	CH4, CO2, N2O	0.446111	0.0148389	3	0.504691	0.0305257	3	9.01235	0.874473	3	10.3642	1.1478	3	0.00648889	0.000930312
Moreno-Barriga et al., 2017	POT	> 3 months ≤1 year	Manure	300-500	10.52	strongly alcaline	3990	high			Coarse	no	2.82	2.82	8	3	2.82	2.82	strongly acid	8	3	alcaline	1:2.5 water		0.5	7.2	low	2700	high	total carbon	0.084	≤1%	1.47875	>1% ≤10%	CH4, CO2, N2O	0.450617	0.0279819	3	0.504691	0.0305257	3	14.4198	0.637626	3	10.3642	1.1478	3	0.00495679	0.000649259
Moreno-Barriga et al., 2017	POT	> 3 months ≤1 year	Manure	300-500	10.52	strongly alcaline	3990	high			Coarse	no	2.82	2.82	8.2	3	2.82	2.82	strongly acid	8.2	3	alcaline	1:2.5 water		1	7.2	low	3000	high	total carbon	0.084	≤1%	2.028	>1% ≤10%	CH4, CO2, N2O	0.441605	0.0245901	3	0.504691	0.0305257	3	11.2654	0.947349	3	10.3642	1.1478	3	0.00811111	0.00441896
Moreno-Barriga et al., 2017	POT	> 3 months ≤1 year	Manure	300-500	10.52	strongly alcaline	3990	high			Coarse	no	2.82	2.82	7.85	3.1	2.82	2.82	strongly acid	7.85	3.1	alcaline	1:2.5 water		0.5			2.75	low	total carbon			0.7605	≤1%	CH4, CO2, N2O	0.355988	0.0254381	3	0.405556	0.0517241	3	13.5185	0.291424	3	10.8148	2.07689	3	0.00342469	0.000329485
Moreno-Barriga et al., 2017	POT	> 3 months ≤1 year	Manure	300-500	10.52	strongly alcaline	3990	high			Coarse	no	2.82	2.82	7.87	3.1	2.82	2.82	strongly acid	7.87	3.1	alcaline	1:2.5 water		1			2.75	low	total carbon			1.90125	>1% ≤10%	CH4, CO2, N2O	0.351481	0.039853	3	0.405556	0.0517241	3	13.9691	2.33195	3	10.8148	2.07689	3	0.0027037	0.000329357
Moreno-Barriga et al., 2017	POT	> 3 months ≤1 year	Manure	300-500	10.52	strongly alcaline	3990	high			Coarse	no	2.82	2.82	7.95	3.1	2.82	2.82	strongly acid	7.95	3.1	alcaline	1:2.5 water		0.5			3.2	low	total carbon			0.88725	≤1%	CH4, CO2, N2O	0.315432	0.0356133	3	0.405556	0.0517241	3	15.321	3.97159	3	10.8148	2.07689	3	0.00216296	0.000503919
Moreno-Barriga et al., 2017	POT	> 3 months ≤1 year	Manure	300-500	10.52	strongly alcaline	3990	high			Coarse	no	2.82	2.82	8	3.1	2.82	2.82	strongly acid	8	3.1	alcaline	1:2.5 water		1			3.25	low	total carbon			1.47875	>1% ≤10%	CH4, CO2, N2O	0.30642	0.0466365	3	0.405556	0.0517241	3	18.9259	2.87837	3	10.8148	2.07689	3	0.00252346	0.000639547
Maienza et al., 2017	FIELD	>2 years	Wood	300-500	9.8	strongly alcaline					Coarse	no	5.37	5.37	5.94	5.5	5.37	5.37	acid	5.94	5.5	acid	1:2.5 water	30						organic carbon	0.47	≤1%	0.001069	≤1%
Maienza et al., 2017	FIELD	>2 years	Wood	300-500	9.8	strongly alcaline					Coarse	no	5.37	5.37	7.18	5.5	5.37	5.37	acid	7.18	5.5	neutral	1:2.5 water	60						organic carbon	0.47	≤1%	0.001116	≤1%
Maienza et al., 2017	FIELD	>2 years	Wood	300-500	9.8	strongly alcaline					Coarse	no	5.37	5.37	6.35	5.24	5.37	5.37	acid	6.35	5.24	acid	1:2.5 water	30						organic carbon			0.001199	≤1%
Maienza et al., 2017	FIELD	>2 years	Wood	300-500	9.8	strongly alcaline					Coarse	no	5.37	5.37	6.55	5.24	5.37	5.37	acid	6.55	5.24	acid	1:2.5 water	60						organic carbon			0.001274	≤1%
Maienza et al., 2017	FIELD	>2 years	Wood	300-500	9.8	strongly alcaline					Coarse	no	5.37	5.37	6.54	5.94	5.37	5.37	acid	6.54	5.94	acid	1:2.5 water	30						organic carbon			0.001917	≤1%
Maienza et al., 2017	FIELD	>2 years	Wood	300-500	9.8	strongly alcaline					Coarse	no	5.37	5.37	7.31	5.94	5.37	5.37	acid	7.31	5.94	neutral	1:2.5 water	30						organic carbon			0.001106	≤1%
Meier et al., 2015a	POT	≤3 months	Manure	300-500	9.1	strongly alcaline	924	Medium	11.51	low	Fine	no	5.76	5.76	6.29	5.35	5.97996	5.97996	acid	6.49459	5.58	acid	1:1 water		1			626	medium	ND	1.74	>1% ≤10%
Meier et al., 2015a	POT	≤3 months	Residues	300-500	7.8	alcaline	789	Medium	0.16	low	Fine	no	5.76	5.76	6.57	5.35	5.97996	5.97996	acid	6.76647	5.58	neutral	1:1 water		1			566	medium	ND	1.74	>1% ≤10%
Meier et al., 2015a	POT	≤3 months	Manure	300-500	9.1	strongly alcaline	924	Medium	11.51	low	Fine	no	5.76	5.76	6.45	5.35	5.97996	5.97996	acid	6.64995	5.58	neutral	1:1 water		5			663	medium	ND	1.74	>1% ≤10%
Meier et al., 2015a	POT	≤3 months	Residues	300-500	7.8	alcaline	789	Medium	0.16	low	Fine	no	5.76	5.76	7.04	5.35	5.97996	5.97996	acid	7.22284	5.58	neutral	1:1 water		5			583	medium	ND	1.74	>1% ≤10%
Meier et al., 2015b	POT	≤3 months	Manure	300-500	9.1	strongly alcaline	924	Medium	11.51	low	Coarse	no	5.76	5.76	6.86	6.67	5.97996	5.97996	acid	7.04806	6.86	neutral	1:1 water		5			912	medium	ND	1.74	>1% ≤10%
Meier et al., 2015b	POT	≤3 months	Manure	300-500	9.1	strongly alcaline	924	Medium	11.51	low	Coarse	no	5.76	5.76	6.99	6.02	5.97996	5.97996	acid	7.17429	6.23	neutral	1:1 water		5			359	medium	ND	1.74	>1% ≤10%
Meier et al., 2015b	POT	≤3 months	Manure	300-500	9.1	strongly alcaline	924	Medium	11.51	low	Coarse	no	5.76	5.76			5.97996	5.97996	acid				1:1 water		5					ND	1.74	>1% ≤10%
Meier et al., 2015b	POT	≤3 months	Manure	300-500	9.1	strongly alcaline	924	Medium	11.51	low	Coarse	no	5.76	5.76	6.52	6.67	5.97996	5.97996	acid	6.71792	6.86	neutral	1:1 water		10			794	medium	ND	1.74	>1% ≤10%
Meier et al., 2015b	POT	≤3 months	Manure	300-500	9.1	strongly alcaline	924	Medium	11.51	low	Coarse	no	5.76	5.76	7.28	6.02	5.97996	5.97996	acid	7.45588	6.23	neutral	1:1 water		10			503.7	medium	ND	1.74	>1% ≤10%
Meier et al., 2015b	POT	≤3 months	Manure	300-500	9.1	strongly alcaline	924	Medium	11.51	low	Coarse	no	5.76	5.76	6.81		5.97996	5.97996	acid	6.99951		neutral	1:1 water		10			576	medium	ND	1.74	>1% ≤10%
Domene et al., 2015	POT	≤3 months	Manure	300-500	7.51	alcaline	2180	high			Coarse	no		7				7.32	neutral				1:20 1N KCl		2					ND	1.3689	>1% ≤10%
Domene et al., 2015	POT	≤3 months	Manure	300-500	7.51	alcaline	2180	high			Coarse	no		7				7.32	neutral				1:20 1N KCl		14					ND	1.3689	>1% ≤10%
Domene et al., 2015	POT	≤3 months	Manure	501-700	10.57	strongly alcaline	2770	high			Coarse	no		7				7.32	neutral				1:20 1N KCl		2					ND	1.3689	>1% ≤10%
Domene et al., 2015	POT	≤3 months	Manure	501-700	10.57	strongly alcaline	2770	high			Coarse	no		7				7.32	neutral				1:20 1N KCl		14					ND	1.3689	>1% ≤10%
Domene et al., 2015	POT	≤3 months	Residues	300-500	7.81	alcaline	1730	high			Coarse	no		7				7.32	neutral				1:20 1N KCl		2					ND	1.3689	>1% ≤10%
Domene et al., 2015	POT	≤3 months	Residues	300-500	7.81	alcaline	1730	high			Coarse	no		7				7.32	neutral				1:20 1N KCl		14					ND	1.3689	>1% ≤10%
Domene et al., 2015	POT	≤3 months	Residues	501-700	10.02	strongly alcaline	1290	high			Coarse	no		7				7.32	neutral				1:20 1N KCl		2					ND	1.3689	>1% ≤10%
Domene et al., 2015	POT	≤3 months	Residues	501-700	10.02	strongly alcaline	1290	high			Coarse	no		7				7.32	neutral				1:20 1N KCl		14					ND	1.3689	>1% ≤10%
Domene et al., 2015	POT	≤3 months	Manure	300-500	8.2	alcaline	1870	high			Coarse	no		7				7.32	neutral				1:20 1N KCl		2					ND	1.3689	>1% ≤10%
Domene et al., 2015	POT	≤3 months	Manure	300-500	8.2	alcaline	1870	high			Coarse	no		7				7.32	neutral				1:20 1N KCl		14					ND	1.3689	>1% ≤10%
Domene et al., 2015	POT	≤3 months	Manure	501-700	10.37	strongly alcaline	1650	high			Coarse	no		7				7.32	neutral				1:20 1N KCl		2					ND	1.3689	>1% ≤10%
Domene et al., 2015	POT	≤3 months	Manure	501-700	10.37	strongly alcaline	1650	high			Coarse	no		7				7.32	neutral				1:20 1N KCl		14					ND	1.3689	>1% ≤10%
Domene et al., 2015	POT	≤3 months	Residues	300-500	7.5	neutral	4370	high			Coarse	no		7				7.32	neutral				1:20 1N KCl		14					ND	1.3689	>1% ≤10%
Domene et al., 2015	POT	≤3 months	Residues	501-700	10.1	strongly alcaline	4280	high			Coarse	no		7				7.32	neutral				1:20 1N KCl		14					total carbon	1.3689	>1% ≤10%
Domene et al., 2015	POT	≤3 months	Wood	300-500	4.49	strongly acid	60	low			Coarse	no		7				7.32	neutral				1:20 1N KCl		2					total carbon	1.3689	>1% ≤10%
Domene et al., 2015	POT	≤3 months	Wood	300-500	4.49	strongly acid	60	low			Coarse	no		7				7.32	neutral				1:20 1N KCl		14					ND	1.3689	>1% ≤10%
Domene et al., 2015	POT	≤3 months	Wood	501-700	7.42	neutral	30	low			Coarse	no		7				7.32	neutral				1:20 1N KCl		2					ND	1.3689	>1% ≤10%
Domene et al., 2015	POT	≤3 months	Wood	501-700	7.42	neutral	30	low			Coarse	no		7				7.32	neutral				1:20 1N KCl		14					ND	1.3689	>1% ≤10%
Domene et al., 2015	POT	≤3 months	Residues	300-500	7.58	alcaline	450	Medium			Coarse	no		7				7.32	neutral				1:20 1N KCl		14					ND	1.3689	>1% ≤10%
Domene et al., 2015	POT	≤3 months	Residues	501-700	9.28	strongly alcaline	180	Medium			Coarse	no		7				7.32	neutral				1:20 1N KCl		14					ND	1.3689	>1% ≤10%
Domene et al., 2015	POT	≤3 months	Wood	300-500	4.72	acid	70	low			Coarse	no		7				7.32	neutral				1:20 1N KCl		2					ND	1.3689	>1% ≤10%
Domene et al., 2015	POT	≤3 months	Wood	300-500	4.72	acid	70	low			Coarse	no		7				7.32	neutral				1:20 1N KCl		14					ND	1.3689	>1% ≤10%
Domene et al., 2015	POT	≤3 months	Wood	501-700	6.23	acid	20	low			Coarse	no		7				7.32	neutral				1:20 1N KCl		2					ND	1.3689	>1% ≤10%
Domene et al., 2015	POT	≤3 months	Wood	501-700	6.23	acid	20	low			Coarse	no		7				7.32	neutral				1:20 1N KCl		14					ND	1.3689	>1% ≤10%
Mackie et al., 2015	FIELD	>1 year ≤2 years	Wood	>700	9.5	strongly alcaline	578	Medium	144	medium	Fine	no	7.7	7.7			8.03848	8.04	alcaline				1:10 0.01M CaCl2	8						organic carbon / total carbon	0.0054	≤1%	0.00465	≤1%
Mackie et al., 2015	FIELD	>1 year ≤2 years	Wood	>700	9.5	strongly alcaline	578	Medium	144	medium	Fine	no	7.2	7.7			7.55298	8.04	neutral				1:10 0.01M CaCl2	8						organic carbon / total carbon	0.009	≤1%	0.0077	≤1%
Cui et al., 2013	FIELD	>1 year ≤2 years	Straw	300-500	10.35	strongly alcaline					Fine	yes	6.07	6.07	6.29	6.18	6.28097	6.28	acid	6.49459	6.39	acid	1:1 water	10						organic carbon	2.071	>1% ≤10%	2.555	>1% ≤10%
Cui et al., 2013	FIELD	>1 year ≤2 years	Straw	300-500	10.35	strongly alcaline					Fine	yes	6.07	6.07	6.45	6.18	6.28097	6.28	acid	6.64995	6.39	neutral	1:1 water	20						organic carbon	2.071	>1% ≤10%	2.928	>1% ≤10%
Cui et al., 2013	FIELD	>1 year ≤2 years	Straw	300-500	10.35	strongly alcaline					Fine	yes	6.07	6.07	6.47	6.18	6.28097	6.28	acid	6.66937	6.39	neutral	1:1 water	40						organic carbon	2.071	>1% ≤10%	3.32	>1% ≤10%
Khan et al., 2022	POT	≤3 months	Straw	300-500	10.76	strongly alcaline	7110	high				no	5.69	5.69	7.3	5.6	5.69	5.69	acid	7.3	5.6	neutral	1:2.5 water		1	180	medium			organic carbon	0.76895	≤1%	2.65	>1% ≤10%	CH4, CO2, N2O	2.74625e-09	7.54464e-11	3	2.05855e-09	2.01185e-10	3	4.44444e-05	6.09053e-06	3	1.97531e-05	2.38683e-06	3	5.55556e-08	4.29847e-09
Khan et al., 2022	POT	≤3 months	Straw	300-500	10.76	strongly alcaline	7110	high				no	5.69	5.69	8.3	5.6	5.69	5.69	acid	8.3	5.6	alcaline	1:2.5 water		2.5	180	medium			organic carbon	0.76895	≤1%	3.36	>1% ≤10%	CH4, CO2, N2O	2.73897e-09	5.25789e-11	3	2.05855e-09	2.01185e-10	3	3.69877e-05	4.65021e-06	3	1.97531e-05	2.38683e-06	3	4.35802e-08	4.85628e-09
Khan et al., 2022	POT	≤3 months	Straw	300-500	9.67	strongly alcaline	10130	high				no	5.69	5.69	6.4	5.6	5.69	5.69	acid	6.4	5.6	acid	1:2.5 water		1	180	medium			organic carbon	0.76895	≤1%	2.49	>1% ≤10%	CH4, CO2, N2O	2.69503e-09	8.68825e-11	3	2.05855e-09	2.01185e-10	3	4.3358e-05	3.20988e-06	3	1.97531e-05	2.38683e-06	3	5.11111e-08	3.12633e-09
Khan et al., 2022	POT	≤3 months	Straw	300-500	9.67	strongly alcaline	10130	high				no	5.69	5.69	7.8	5.6	5.69	5.69	acid	7.8	5.6	alcaline	1:2.5 water		2.5	180	medium			organic carbon	0.76895	≤1%	2.91	>1% ≤10%	CH4, CO2, N2O	2.65119e-09	1.30326e-10	3	2.05855e-09	2.01185e-10	3	3.33333e-05	3.66255e-06	3	1.97531e-05	2.38683e-06	3	4.37037e-08	4.46642e-09
Zhang et al., 2021	POT	≤3 months	Sludge	600	8.09	alcaline			111.8	medium		no	4.6	4.6			5.2376	5.24	acid				1:2.5 0.01 M CaCl2		40					ND	2.4824	>1% ≤10%			CH4, CO2, N2O	8.7303	0.0001	3	7.82641	0.0001	3							68.3212	0.0001
Xu et al., 2019	INCUBATION	≤3 months	Manure	300-500	10.6	strongly alcaline					Fine	yes	6.25	6.25			6.17172	6.17	acid				1:5 water		1					organic matter	2.1924	>1% ≤10%
Xu et al., 2019	INCUBATION	≤3 months	Wood	300-500	8.39	alcaline					Fine	yes	6.25	6.25			6.17172	6.17	acid				1:5 water		1					organic matter	2.1924	>1% ≤10%
Xu et al., 2019	INCUBATION	≤3 months	Manure	300-500	10.6	strongly alcaline					Fine	yes	6.25	6.25			6.17172	6.17	acid				1:5 water		1					organic matter	2.1924	>1% ≤10%
Xu et al., 2019	INCUBATION	≤3 months	Wood	300-500	8.39	alcaline					Fine	yes	6.25	6.25			6.17172	6.17	acid				1:5 water		1					organic matter	2.1924	>1% ≤10%
Latini et al., 2019	POT	≤3 months	Wood	501-700	9.78	strongly alcaline	469	medium	485	high	Coarse	yes	5.17	5.17	6.44	6.56	5.40707	5.41	acid	6.64024	6.76	neutral	1:1 water		3			66.8	low	organic carbon	2.31	>1% ≤10%	3.69	>1% ≤10%
Latini et al., 2019	POT	≤3 months	Wood	501-700	9.78	strongly alcaline	469	medium	485	high	Coarse	yes	5.17	5.17	6.73	6.56	5.40707	5.41	acid	6.92183	6.76	neutral	1:1 water		3			95.1	low	organic carbon	2.31	>1% ≤10%	3.1	>1% ≤10%
Latini et al., 2019	POT	≤3 months	Straw	501-700	10.3	strongly alcaline	1520	high	23.2	low	Coarse	yes	5.17	5.17	6.51	6.56	5.40707	5.41	acid	6.70821	6.76	neutral	1:1 water		3			123.2	medium	organic carbon	2.31	>1% ≤10%	2.6	>1% ≤10%
Latini et al., 2019	POT	≤3 months	Wood	501-700	9.78	strongly alcaline	469	medium	485	high	Coarse	yes	5.17	5.17	6.4	6.56	5.40707	5.41	acid	6.6014	6.73	neutral	1:1 water		3			74.6	low	organic carbon	2.31	>1% ≤10%	3.97	>1% ≤10%
Latini et al., 2019	POT	≤3 months	Wood	501-700	9.78	strongly alcaline	469	medium	485	high	Coarse	yes	5.17	5.17	6.73	6.56	5.40707	5.41	acid	6.92183	6.73	neutral	1:1 water		3			91.5	low	organic carbon	2.31	>1% ≤10%	2.96	>1% ≤10%
Latini et al., 2019	POT	≤3 months	Straw	501-700	10.3	strongly alcaline	1520	high	23.2	low	Coarse	yes	5.17	5.17	6.56	6.56	5.40707	5.41	acid	6.75676	6.73	neutral	1:1 water		3			129.6	medium	organic carbon	2.31	>1% ≤10%	3.52	>1% ≤10%
Zhang et al., 2019	POT	≤3 months	Residues	300-500	8.76	alcaline						yes	5.37	5.37	6.05	5.37	5.60127	5.6	acid	6.26155	5.6	acid	ND		2					organic matter	0.7424	≤1%	1.3224	>1% ≤10%
Zhang et al., 2019	POT	≤3 months	Residues	300-500	8.76	alcaline						yes	5.37	5.37	6.38	5.37	5.60127	5.6	acid	6.58198	5.6	acid	ND		2					organic matter	0.7424	≤1%	1.30906	>1% ≤10%
Zhang et al., 2019	POT	≤3 months	Residues	300-500	8.76	alcaline					Medium	yes	6.05	6.05	6.71	6.05	6.26155	6.26	acid	6.90241	6.26	neutral	ND		2					organic matter	0.48778	≤1%	0.92626	≤1%
Zhang et al., 2019	POT	≤3 months	Residues	300-500	8.76	alcaline					Medium	yes	6.05	6.05	6.57	6.05	6.26155	6.26	acid	6.76647	6.26	neutral	ND		2					organic matter	0.48778	≤1%	0.93032	≤1%
Zhang et al., 2019	POT	≤3 months	Residues	300-500	8.76	alcaline						yes	8.27	8.27	8.27	8.27	8.41717	8.42	alcaline	8.41717	8.27	alcaline	ND		2					organic matter	1.02892	>1% ≤10%	1.7951	>1% ≤10%
Zhang et al., 2019	POT	≤3 months	Residues	300-500	8.76	alcaline						yes	8.27	8.27	8.23	8.27	8.41717	8.42	alcaline	8.37833	8.27	alcaline	ND		2					organic matter	1.02892	>1% ≤10%	1.68664	>1% ≤10%
Zhang et al., 2019	POT	≤3 months	Residues	300-500	8.76	alcaline					Fine	yes	9.13	9.13	8.89	9.13	9.25223	9.25	strongly alcaline	9.01919	9.25	strongly alcaline	ND		2					organic matter	2.4766	>1% ≤10%	3.24568	>1% ≤10%
Zhang et al., 2019	POT	≤3 months	Residues	300-500	8.76	alcaline					Fine	yes	9.13	9.13	8.47	9.13	9.25223	9.25	strongly alcaline	8.61137	9.25	alcaline	ND		2					organic matter	2.4766	>1% ≤10%	3.3002	>1% ≤10%
Zhou et al., 2018	POT	> 3 months ≤1 year	Wood	300-500	8.89	alcaline					Coarse	no	7.79	7.79	7.73	7.72	7.79	7.79	alcaline	7.73	7.72	alcaline	1:2.5 water		0.5					organic matter	2.5288	>1% ≤10%	2.4708	>1% ≤10%
Zhou et al., 2018	POT	> 3 months ≤1 year	Wood	300-500	8.89	alcaline					Coarse	no	7.79	7.79	7.76	7.72	7.79	7.79	alcaline	7.76	7.72	alcaline	1:2.5 water		1					organic matter	2.5288	>1% ≤10%	2.6738	>1% ≤10%
Zhou et al., 2018	POT	> 3 months ≤1 year	Wood	300-500	8.89	alcaline					Coarse	no	7.79	7.79	7.79	7.72	7.79	7.79	alcaline	7.79	7.72	alcaline	1:2.5 water		2					organic matter	2.5288	>1% ≤10%	2.9232	>1% ≤10%
Zhou et al., 2018	POT	> 3 months ≤1 year	Wood	300-500	8.89	alcaline					Coarse		7.79	7.79	7.83	7.72	7.79	7.79	alcaline	7.83	7.72	alcaline	1:2.5 water		4					organic matter	2.5288	>1% ≤10%	3.2944	>1% ≤10%
Xu et al., 2017	POT		Residues	501-700	10.01	strongly alcaline			245.6	high	Fine	no	5.9	5.9			6.1159	6.12	acid				1:1 water		0.5					organic matter			20.3	>10%
Xu et al., 2017	POT		Residues	501-700	10.01	strongly alcaline			245.6	high	Fine	no	5.9	5.9			6.1159	6.12	acid				1:1 water		1					organic matter			21.054	>10%
Xu et al., 2017	POT		Residues	501-700	10.01	strongly alcaline			245.6	high	Fine	no	5.9	5.9			6.1159	6.12	acid				1:1 water		2					organic matter			22.272	>10%
Moreno-Barriga et al., 2017	POT	> 3 months ≤1 year	Manure	300-500	10.52	strongly alcaline	3990	high			Coarse	no	8	8	7.9	3	8	8	alcaline	7.9	3	alcaline	1:2.5 water		0.5			2700	high	total carbon	2	>1% ≤10%	0.845	≤1%
Moreno-Barriga et al., 2017	POT	> 3 months ≤1 year	Manure	300-500	10.52	strongly alcaline	3990	high			Coarse	no	8	8	7.95	3	8	8	alcaline	7.95	3	alcaline	1:2.5 water		1			40	low	total carbon	2	>1% ≤10%	1.47875	>1% ≤10%
Moreno-Barriga et al., 2017	POT	> 3 months ≤1 year	Manure	300-500	10.52	strongly alcaline	3990	high			Coarse	no	8	8	8	3	8	8	alcaline	8	3	alcaline	1:2.5 water		0.5			3.1	low	total carbon	2	>1% ≤10%	1.47875	>1% ≤10%
Moreno-Barriga et al., 2017	POT	> 3 months ≤1 year	Manure	300-500	10.52	strongly alcaline	3990	high			Coarse	no	8	8	8.2	3	8	8	alcaline	8.2	3	alcaline	1:2.5 water		1			3.7	low	total carbon	2	>1% ≤10%	2.2815	>1% ≤10%
Moreno-Barriga et al., 2017	POT	> 3 months ≤1 year	Manure	300-500	10.52	strongly alcaline	3990	high			Coarse	no	8	8	7.85	3.1	8	8	alcaline	7.85	3.1	alcaline	1:2.5 water		0.5			2.75	low	total carbon			0.7605	≤1%
Moreno-Barriga et al., 2017	POT	> 3 months ≤1 year	Manure	300-500	10.52	strongly alcaline	3990	high			Coarse	no	8	8	7.87	3.1	8	8	alcaline	7.87	3.1	alcaline	1:2.5 water		1			2.75	low	total carbon			1.90125	>1% ≤10%
Moreno-Barriga et al., 2017	POT	> 3 months ≤1 year	Manure	300-500	10.52	strongly alcaline	3990	high			Coarse	no	8	8	7.95	3.1	8	8	alcaline	7.95	3.1	alcaline	1:2.5 water		0.5			3.2	low	total carbon			0.88725	≤1%
Moreno-Barriga et al., 2017	POT	> 3 months ≤1 year	Manure	300-500	10.52	strongly alcaline	3990	high			Coarse	no	8	8	8	3.1	8	8	alcaline	8	3.1	alcaline	1:2.5 water		1			3.25	low	total carbon			1.47875	>1% ≤10%
Agegnehu et al., 2015	FIELD	> 3 months ≤1 year	Wood	501-700	8.3	alcaline	710	medium			Fine	yes	6.3	5.6	5.92	5.76	6.3	5.6	acid	5.92	5.76	acid	1:2.5 water	10		0.05	low	40	low	organic carbon	0.61	≤1%			CO2, N2O							46224.3	2491.33	3	40662	4853.24	3	3.22228	0.872331
Agegnehu et al., 2015	FIELD	> 3 months ≤1 year	Wood	501-700	7.5	neutral	2000	high			Fine	yes	6.3	5.6	5.86	5.76	6.3	5.6	acid	5.86	5.76	acid	1:2.5 water	2.5				40	low	ND					CO2, N2O							50827.6	1705.08	3	40662	4853.24	3	0.00149196	0.319855
Dicke et al., 2015	FIELD	>1 year ≤2 years	Residues	501-700	9.9	strongly alcaline	3100	high			Coarse	yes	5.73	5.73	6.5	6.65	6.54011	6.54	acid	7.2639	7.4	neutral	1:1 CaCl2	10.9						ND	0.61685	≤1%			N2O													0.00081571	0.000229111
Dicke et al., 2015	FIELD	>1 year ≤2 years	Wood	>700	9.3	strongly alcaline	1700	high			Coarse	yes	5.73	5.73	6.46	6.65	6.54011	6.54	acid	7.2263	7.4	neutral	1:1 CaCl2	18.8						ND	0.61685	≤1%			N2O													0.000749571	0.000210018
Fungo et al., 2014	POT	≤3 months	Residues	300-500	9.3	strongly alcaline						no	6.2	6.2			6.99951	6.99951	neutral				1:20 water	15						ND					CH4, N2O	29.7917	3.44118	4	21.9853	2.40842	4							6.27696	0.641117
Fungo et al., 2014	POT	≤3 months	Residues	300-500	9.3	strongly alcaline						no	6.2	6.2			6.99951	6.99951	neutral				1:20 water	15						ND					CH4, N2O	40.4657	4.24427	4	21.9853	2.40842	4							5.51225	0.534306
Fungo et al., 2014	POT	≤3 months	Residues	501-700	10	strongly alcaline						no	6.2	6.2			6.99951	6.99951	neutral				1:20 water	15						ND					CH4, N2O	37.9167	3.55589	4	21.9853	2.40842	4							5.70343	0.573095
Fungo et al., 2014	POT	≤3 months	Residues	501-700	10	strongly alcaline						no	6.2	6.2			6.99951	6.99951	neutral				1:20 water	15						ND					CH4, N2O	45.8824	4.81766	4	21.9853	2.40842	4							5.06618	0.514879
Fungo et al., 2014	POT	≤3 months	Wood	300-500	7.5	neutral						no	6.2	6.2			6.99951	6.99951	neutral				1:20 water	15						ND					CH4, N2O	50.9804	4.70283	4	21.9853	2.40842	4							5.89461	0.631426
Fungo et al., 2014	POT	≤3 months	Wood	300-500	7	neutral						no	6.2	6.2			6.99951	6.99951	neutral				1:20 water	15						ND					CH4, N2O	34.5711	3.67046	4	21.9853	2.40842	4							6.08578	0.631426
Fungo et al., 2014	POT	≤3 months	Wood	501-700	9.5	strongly alcaline						no	6.2	6.2			6.99951	6.99951	neutral				1:20 water	15						ND					CH4, N2O	47.7941	4.93237	4	21.9853	2.40842	4							6.85049	0.72857
Fungo et al., 2014	POT	≤3 months	Wood	501-700	10.2	strongly alcaline						no	6.2	6.2			6.99951	6.99951	neutral				1:20 water	15						ND					CH4, N2O	34.7304	3.67033	4	21.9853	2.40842	4							6.18137	0.631472
Harter et al., 2013a	POT	≤3 months	Grass	501-700	9.8	strongly alcaline	337	medium	303	high	Coarse	yes	8.4	8.4			8.34343	8.34343	alcaline				1:5 water		10					ND	0.91	≤1%			CO2, N2O							2.68593	0.0814679	3	3.15915	0.0848013	3	0.015264	0
Ji et al., 2019	POT	≤3 months	Straw	300-500	10.9	strongly alcaline					Fine	yes	4.82	4.82	5.29	4.62	4.72727	4.73	acid	5.20202	4.53	acid	1:5 water		4					organic carbon	2.023	>1% ≤10%			N2O													9.61481e-05	0
Ji et al., 2019	POT	≤3 months	Straw	300-500	10.9	strongly alcaline					Fine	yes	4.82	4.82	5.41	4.62	4.72727	4.73	acid	5.32323	4.53	acid	1:5 water		4					organic carbon	2.023	>1% ≤10%			N2O													0.000597333	0
Ji et al., 2019	POT	≤3 months	Straw	300-500	10.9	strongly alcaline					Fine	yes	7.39	7.39	7.54	7.37	7.32323	7.32	neutral	7.47475	7.3	neutral	1:5 water		4					organic carbon	1.12	>1% ≤10%			N2O													2e-05	0
Ji et al., 2019	POT	≤3 months	Straw	300-500	10.9	strongly alcaline					Fine	yes	7.39	7.39	7.51	7.37	7.32323	7.32	neutral	7.44444	7.3	neutral	1:5 water		4					organic carbon	1.12	>1% ≤10%			N2O													0.000956593	0
Ji et al., 2019	POT	≤3 months	Straw	300-500	10.9	strongly alcaline					Fine	yes	8.05	8.05	8.43	8.07	7.9899	7.99	alcaline	8.37374	8.01	alcaline	1:5 water		4					organic carbon	1.783	>1% ≤10%			N2O													3.1358e-05	0
Ji et al., 2019	POT	≤3 months	Straw	300-500	10.9	strongly alcaline					Fine	yes	8.05	8.05	8.14	8.07	7.9899	7.99	alcaline	8.08081	8.01	alcaline	1:5 water		4					organic carbon	1.783	>1% ≤10%			N2O													0.0016244	0
Kang et al., 2016	POT	≤3 months	Straw	300-500	7.72	alcaline					Coarse	yes	6.45	6.45			6.37374	6.37	acid				1:5 water	0.0247097		160	medium			ND	1.3804	>1% ≤10%			CH4, CO2, N2O	0.0890667	0.00749571	3	0.111774	0.0103617	3	0.601311	0.0129472	3	0.336205	0.00298819	3	0.0846354	0.00200621
Kang et al., 2016	POT	≤3 months	Straw	300-500	7.72	alcaline					Coarse	yes	6.45	6.45			6.37374	6.37	acid				1:5 water	0.074129		160	medium			ND	1.3804	>1% ≤10%			CH4, CO2, N2O	0.0879644	0.00374786	3	0.111774	0.0103617	3	0.704928	0.0189253	3	0.336205	0.00298819	3	0.0803585	0.00220462
Kang et al., 2016	POT	≤3 months	Straw	300-500	7.72	alcaline					Coarse	yes	6.45	6.45			6.37374	6.37	acid				1:5 water	0.123548		160	medium			ND	1.3804	>1% ≤10%			CH4, CO2, N2O	0.0765004	0.0109129	3	0.111774	0.0103617	3	0.914918	0.0179292	3	0.336205	0.00298819	3	0.0761256	0.00149914
Karhu et al., 2011	FIELD	≤3 months	Wood	300-500					3.6	low	Medium	no	6.9	6.9			7.0869	7.09	neutral				ND	9						ND	1.81	>1% ≤10%			CH4, CO2, N2O	-0.00113274	0.000101808	4	-0.000575405	0.000119567	4	29.9218	0.621023	4	28.5456	0.488919	4	0.0093533	0.000235054
Lan et al., 2016	INCUBATION	≤3 months	Wood	>700	3.4	strongly acid			109	medium	Medium	no	5.4	5.65	5.5	5.7	5.31313	5.57	acid	5.41414	5.62	acid	1:5 water		2.5	1.21	low	910	medium	organic carbon- total carbon	0.0423	≤1%	0.0392	≤1%	N2O													0.000839506	4.11523e-05
Lan et al., 2016	INCUBATION	≤3 months	Wood	501-700	8.2	alcaline			322	high	Medium	no	5.8	5.65	6	5.7	5.71717	5.57	acid	5.91919	5.62	acid	1:5 water		2.5	1.22	low	1030	high	organic carbon- total carbon	0.0425	≤1%	0.035	≤1%	N2O													0.000888889	1.37174e-05
Lan et al., 2016	INCUBATION	≤3 months	Wood	501-700	9.5	strongly alcaline			233	high	Medium	no	6.24	5.65	6.35	5.7	6.16162	5.57	acid	6.27273	5.62	acid	1:5 water		2.5	1.23	low	1080	high	organic carbon- total carbon	0.0475	≤1%	0.03425	≤1%	N2O													0.000977778	0.000126886
Lan et al., 2016	INCUBATION	≤3 months	Wood	501-700	10.2	strongly alcaline			205	high	Medium	no	5.9	5.65	6	5.7	5.81818	5.57	acid	5.91919	5.62	acid	1:5 water		2.5	1.12	low	980	medium	organic carbon- total carbon	0.0428	≤1%	0.0345	≤1%	N2O													0.000864198	4.11524e-05
Lan et al., 2016	INCUBATION	≤3 months	Residues	501-700	7.4	neutral			94	medium	Medium	no	5.84	5.65	5.95	5.7	5.75758	5.57	acid	5.86869	5.62	acid	1:5 water		2.5	1.31	low	1190	high	organic carbon- total carbon	0.045	≤1%	0.0365	≤1%	N2O													0.000679012	2.05761e-05
Lan et al., 2016	INCUBATION	≤3 months	Grass	300-500	10	strongly alcaline			271	high	Medium	no	6.08	5.65	6.15	5.7	6	5.57	acid	6.07071	5.62	acid	1:5 water		2.5	1.29	low	1080	high	organic carbon- total carbon	0.0468	≤1%	0.034	≤1%	N2O													0.000666667	3.08642e-05
Lan et al., 2016	INCUBATION	≤3 months	Wood	501-700	8.9	alcaline			382	high	Medium	no	5.92	5.65	6.1	5.7	5.83838	5.57	acid	6.0202	5.62	acid	1:5 water		2.5	1.06	low	900	medium	organic carbon- total carbon	0.0402	≤1%	0.0352	≤1%	N2O													0.000617284	1.71468e-05
Lan et al., 2016	INCUBATION	≤3 months	Wood	>700	3.4	strongly acid			109	medium	Coarse	no	4.68	5.8	4.7	5.95	4.58586	5.72	acid	4.60606	5.87	acid	1:5 water		2.5	0.23	low	190	medium	organic carbon- total carbon	0.004	≤1%	0.0052	≤1%	N2O													0.00014321	3.108e-05
Lan et al., 2016	INCUBATION	≤3 months	Wood	501-700	8.2	alcaline			322	high	Coarse	no	6.95	5.8	6.8	5.95	6.87879	5.72	neutral	6.72727	5.87	neutral	1:5 water		2.5	0.248	low	238	medium	organic carbon- total carbon	0.0049	≤1%	0.0048	≤1%	N2O													9.62963e-05	9.324e-06
Lan et al., 2016	INCUBATION	≤3 months	Wood	501-700	9.5	strongly alcaline			233	high	Coarse	no	7.9	5.8	7.8	5.95	7.83838	5.72	alcaline	7.73737	5.87	alcaline	1:5 water		2.5	0.345	low	355	medium	organic carbon- total carbon	0.0086	≤1%	0.0083	≤1%	N2O													0.000120988	1.45011e-05
Lan et al., 2016	INCUBATION	≤3 months	Wood	501-700	10.2	strongly alcaline			205	high	Coarse	no	6.75	5.8	7	5.95	6.67677	5.72	neutral	6.92929	5.87	neutral	1:5 water		2.5	0.21	low	135	medium	organic carbon- total carbon	0.0034	≤1%	0.0058	≤1%	N2O													0.000111111	1.34651e-05
Lan et al., 2016	INCUBATION	≤3 months	Residues	501-700	7.4	neutral			94	medium	Coarse	no	6.45	5.8	6.4	5.95	6.37374	5.72	acid	6.32323	5.87	acid	1:5 water		2.5	0.34	low	335	medium	organic carbon- total carbon	0.0049	≤1%	0.005	≤1%	N2O													0.000101235	1.24349e-05
Lan et al., 2016	INCUBATION	≤3 months	Grass	300-500	10	strongly alcaline			271	high	Coarse	no	7.6	5.8	7.45	5.95	7.53535	5.72	neutral	7.38384	5.87	neutral	1:5 water		2.5	0.375	low	350	medium	organic carbon- total carbon	0.008	≤1%	0.0052	≤1%	N2O													9.87654e-05	1.34709e-05
Lan et al., 2016	INCUBATION	≤3 months	Wood	501-700	8.9	alcaline			382	high	Coarse	no	7.12	5.8	6.9	5.95	7.05051	5.72	neutral	6.82828	5.87	neutral	1:5 water		2.5	0.154	low	115	medium	organic carbon- total carbon	0.0041	≤1%	0.0061	≤1%	N2O													8.64198e-05	9.32401e-06
Lentz et al., 2014	FIELD	>2 years	Wood	300-500	6.8	neutral	0.7	low	0.75	low	Medium	yes	7.7	7.7			7.8637	7.86	alcaline				1:1 water	24.69		0.4	low			ND	1.2	>1% ≤10%			CH4, CO2, N2O	0.39573		3	0.532416		3	5.12575		3	5.46746		3	0.160937
Lentz et al., 2014	FIELD	>2 years	Wood	300-500	6.8	neutral	0.7	low	0.75	low	Medium	yes	7.7	7.7			7.8637	7.86	alcaline				1:1 water	24.69		0.4	low			ND	1.2	>1% ≤10%			CH4, CO2, N2O	0.640443		3	0.532416		3	6.2501		3	5.46746		3	0.229281
Liu et al., 2014a	FIELD	≤3 months	Straw	300-500	10.4	strongly alcaline					Medium	yes	8.38	8.38	8.38	8.28	8.38	8.38	alcaline	8.38	8.28	alcaline	1:2.5 water	20						organic carbon	0.987	≤1%	1.45	>1% ≤10%	CH4, CO2, N2O	-0.0001433	5.51155e-05	3	-0.000429901	6.61387e-05	3	1.67551	0.0617294	3	1.65567	0.135584	3	0.00120152	6.61387e-05
Liu et al., 2014a	FIELD	≤3 months	Straw	300-500	10.4	strongly alcaline					Medium	yes	8.38	8.38	8.23	8.28	8.38	8.38	alcaline	8.23	8.28	alcaline	1:2.5 water	40						organic carbon	0.987	≤1%	1.65	>1% ≤10%	CH4, CO2, N2O	-0.000121254	5.51155e-05	3	-0.000429901	6.61387e-05	3	1.61489	0.035274	3	1.65567	0.135584	3	0.000782641	5.51155e-05
Liu et al., 2014a	FIELD	≤3 months	Straw	300-500	10.4	strongly alcaline					Medium	yes	8.38	8.38			8.38	8.38	alcaline				1:2.5 water	20						organic carbon	0.987	≤1%	1.491	>1% ≤10%	CH4, CO2, N2O	-0.000231485	5.51155e-05	3	-0.000429901	6.61387e-05	3	1.3845	0.063934	3	1.65567	0.0881849	3	0.000418878	5.51155e-05
Liu et al., 2014a	FIELD	≤3 months	Straw	300-500	10.4	strongly alcaline					Medium	yes	8.38	8.38			8.38	8.38	alcaline				1:2.5 water	40						organic carbon	0.987	≤1%	1.616	>1% ≤10%	CH4, CO2, N2O	-0.000209439	3.30693e-05	3	-0.000429901	6.61387e-05	3	1.38891	0.109129	3	1.65567	0.0881849	3	0.000418878	4.40924e-05
Liu et al., 2014a	FIELD	≤3 months	Straw	300-500	10.4	strongly alcaline					Medium	yes	8.38	8.38	8.11	8.25	8.38	8.38	alcaline	8.11	8.25	alcaline	1:2.5 water	20						organic carbon	0.987	≤1%	1.41	>1% ≤10%	CH4, CO2, N2O	-0.000253532	0.000110231	3	-0.000363763	4.40924e-05	3	3.32126	0.112436	3	3.32567	0.10031	3	0.00243611	0.000330693
Liu et al., 2014a	FIELD	≤3 months	Straw	300-500	10.4	strongly alcaline					Medium	yes	8.38	8.38	8.23	8.25	8.38	8.38	alcaline	8.23	8.25	alcaline	1:2.5 water	40						organic carbon	0.987	≤1%	1.551	>1% ≤10%	CH4, CO2, N2O	-0.000198416	7.71618e-05	3	-0.000363763	4.40924e-05	3	3.50535	0.229281	3	3.32567	0.10031	3	0.00210541	5.51155e-05
Liu et al., 2015b	INCUBATION	> 3 months ≤1 year	Residues	501-700	8.31	alcaline		0.98	low		Coarse	no	7.28	7.17	7.4	7.18	7.45588	7.35	neutral	7.5724	7.36	neutral	1:1 water		0.5					organic carbon	1.736	>1% ≤10%	1.384	>1% ≤10%	CO2							12.1903	0.215278	3	10.7174	0.197425	3
Liu et al., 2015b	INCUBATION	> 3 months ≤1 year	Residues	501-700	8.31	alcaline		0.98	low		Coarse	no	7.33	7.17	7.43	7.18	7.50443	7.35	neutral	7.60153	7.36	alcaline	1:1 water		1					organic carbon	1.736	>1% ≤10%	1.509	>1% ≤10%	CO2							10.2634	0.190538	3	10.7174	0.197425	3
Liu et al., 2015b	INCUBATION	> 3 months ≤1 year	Residues	501-700	8.31	alcaline		0.98	low		Coarse	no	7.32	7.17	7.48	7.18	7.49472	7.35	neutral	7.65008	7.36	alcaline	1:1 water		2					organic carbon	1.736	>1% ≤10%	1.527	>1% ≤10%	CO2							8.12143	0.200155	3	10.7174	0.197425	3
Liu et al., 2015b	INCUBATION	> 3 months ≤1 year	Residues	501-700	8.52	alcaline		28.42	low		Coarse	no	7.35	7.17	7.6	7.18	7.52385	7.35	neutral	7.7666	7.36	alcaline	1:1 water		0.5					organic carbon	1.736	>1% ≤10%	1.485	>1% ≤10%	CO2							13.1385	0.186888	3	10.7174	0.197425	3
Liu et al., 2015b	INCUBATION	> 3 months ≤1 year	Residues	501-700	8.52	alcaline		28.42	low		Coarse	no	7.38	7.17	7.74	7.18	7.55298	7.35	neutral	7.90254	7.36	alcaline	1:1 water		1					organic carbon	1.736	>1% ≤10%	1.539	>1% ≤10%	CO2							11.5245	0.225894	3	10.7174	0.197425	3
Liu et al., 2015b	INCUBATION	> 3 months ≤1 year	Residues	501-700	8.52	alcaline		28.42	low		Coarse	no	7.34	7.17	7.86	7.18	7.51414	7.35	neutral	8.01906	7.36	alcaline	1:1 water		2					organic carbon	1.736	>1% ≤10%	1.652	>1% ≤10%	CO2							9.18361	0.22184	3	10.7174	0.197425	3
Liu et al., 2015b	INCUBATION	> 3 months ≤1 year	Residues	>700	8.64	alcaline		111.93	medium		Coarse	no	7.2	7.17	7.73	7.18	7.3782	7.35	neutral	7.89283	7.36	alcaline	1:1 water		0.5					organic carbon	1.736	>1% ≤10%	1.519	>1% ≤10%	CO2							12.2913	0.169241	3	10.7174	0.197425	3
Liu et al., 2015b	INCUBATION	> 3 months ≤1 year	Residues	>700	8.64	alcaline		111.93	medium		Coarse	no	7.5	7.17	7.88	7.18	7.6695	7.35	alcaline	8.03848	7.36	alcaline	1:1 water		1					organic carbon	1.736	>1% ≤10%	1.639	>1% ≤10%	CO2							10.1627	0.177887	3	10.7174	0.197425	3
Liu et al., 2015b	INCUBATION	> 3 months ≤1 year	Residues	>700	8.64	alcaline		111.93	medium		Coarse	no	7.45	7.17	7.99	7.18	7.62095	7.35	alcaline	8.14529	7.36	alcaline	1:1 water		2					organic carbon	1.736	>1% ≤10%	1.663	>1% ≤10%	CO2							7.86904	0.209815	3	10.7174	0.197425	3
Martin et al., 2015	INCUBATION	> 3 months ≤1 year	Wood	300-500	9	alcaline					Coarse	no	7.35	7.35	7.37	7.69	7.35	7.35	neutral	7.37	7.69	neutral	1:2.5 water		1			165.31	medium	total carbon	2.146	>1% ≤10%	2.9575	>1% ≤10%	N2O													0	0
Martin et al., 2015	INCUBATION	> 3 months ≤1 year	Wood	300-500	9	alcaline					Coarse	no	7.35	7.35	7.56	7.69	7.35	7.35	neutral	7.56	7.69	neutral	1:2.5 water		3			164.15	medium	total carbon	2.146	>1% ≤10%	3.718	>1% ≤10%	N2O													0	0
Martin et al., 2015	INCUBATION	> 3 months ≤1 year	Wood	300-500	9	alcaline					Coarse	no	7.35	7.35	6.78	6.67	7.35	7.35	neutral	6.78	6.67	neutral	1:2.5 water		1			1483.68	high	ND					N2O													3.35258	1.79881
Martin et al., 2015	INCUBATION	> 3 months ≤1 year	Wood	300-500	9	alcaline					Coarse	no	7.35	7.35	6.76	6.67	7.35	7.35	neutral	6.76	6.67	neutral	1:2.5 water		3			1409.23	high	ND					N2O													1.93871	0.674552
Martin et al., 2015	INCUBATION	> 3 months ≤1 year	Wood	300-500	9	alcaline					Coarse	no	7.35	7.35	7.3	7.24	7.35	7.35	neutral	7.3	7.24	neutral	1:2.5 water		1			1678.04	high	ND					N2O													9.62695	4.04678
Martin et al., 2015	INCUBATION	> 3 months ≤1 year	Wood	300-500	9	alcaline					Coarse	no	7.35	7.35	7.4	7.24	7.35	7.35	neutral	7.4	7.24	neutral	1:2.5 water		3			1561.4	high	ND					N2O													4.4055	1.79881
Martin et al., 2015	INCUBATION	> 3 months ≤1 year	Wood	300-500	9	alcaline					Coarse	no	7.35	7.35	6.63	7	7.35	7.35	neutral	6.63	7	neutral	1:2.5 water		1			1820.03	high	ND					N2O													68.346	7.42007
Martin et al., 2015	INCUBATION	> 3 months ≤1 year	Wood	300-500	9	alcaline					Coarse	no	7.35	7.35	6.53	7	7.35	7.35	neutral	6.53	7	acid	1:2.5 water		3			2207.14	high	ND					N2O													41.1429	12.1409
Maucieri et al., 2017	INCUBATION	≤3 months	Wood	300-500	9.6	strongly alcaline	3400	high			Fine	no	7.25	7.25	7.04	6.93	7.25	7.25	neutral	7.04	7.04	neutral	1:2.5 water		5	185.87	medium	967.9	medium	ND	0.0106	≤1%	0.01903	≤1%	CH4, CO2, N2O	-0.00016321	9.1358e-06	3	-0.000179012	8.14815e-06	3	1.48272	0.0903704	3	1.64346	0.106173	3	7.28395e-05	4.44444e-06
Qin et al., 2016	FIELD	>1 year ≤2 years	Straw	350-500	8.1	alcaline	12.5	Low			Coarse	yes	7	7			6.92929	6.92929	neutral				1:5 water	5						ND	2.67	>1% ≤10%			CH4, N2O	0.23754	0.125436	3	0.330238	0.174774	3							0.00407294	0.00058286
Qin et al., 2016	FIELD	>1 year ≤2 years	Straw	350-500	8.1	alcaline	12.5	Low			Coarse	yes	7	7			6.92929	6.92929	neutral				1:5 water	10						ND	2.67	>1% ≤10%			CH4, N2O	0.201329	0.116238	3	0.330238	0.174774	3							0.00465423	0.000402232
Qin et al., 2016	FIELD	>1 year ≤2 years	Straw	350-500	8.1	alcaline	12.5	Low			Coarse	yes	7	7			6.92929	6.92929	neutral				1:5 water	20						ND	2.67	>1% ≤10%			CH4, N2O	0.201329	0.175611	3	0.330238	0.174774	3							0.00292579	0.000520978
Qin et al., 2016	FIELD	>1 year ≤2 years	Straw	350-500	8.1	alcaline	12.5	Low			Coarse	yes	7	7			6.92929	6.92929	neutral				1:5 water	5						ND	2.67	>1% ≤10%			CH4, N2O	0.151601	0.0459933	3	0.180569	0.0844604	3							0.00139386	0.000112893
Qin et al., 2016	FIELD	>1 year ≤2 years	Straw	350-500	8.1	alcaline	12.5	Low			Coarse	yes	7	7			6.92929	6.92929	neutral				1:5 water	10						ND	2.67	>1% ≤10%			CH4, N2O	0.287269	0.173102	3	0.180569	0.0844604	3							0.00184769	0.000217423
Qin et al., 2016	FIELD	>1 year ≤2 years	Straw	350-500	8.1	alcaline	12.5	Low			Coarse	yes	7	7			6.92929	6.92929	neutral				1:5 water	20						ND	2.67	>1% ≤10%			CH4, N2O	0.169947	0.110384	3	0.180569	0.0844604	3							0.00177044	0.000254217
Qin et al., 2016	FIELD	>2 years	Straw	350-500	8.1	alcaline	12.5	Low			Coarse	yes	7	7			6.92929	6.92929	neutral				1:5 water	5						ND	2.67	>1% ≤10%			CH4, N2O	0.205675	0.1246	3	0.257335	0.122091	3							0.00066289	0.00171262
Qin et al., 2016	FIELD	>2 years	Straw	350-500	8.1	alcaline	12.5	Low			Coarse	yes	7	7			6.92929	6.92929	neutral				1:5 water	10						ND	2.67	>1% ≤10%			CH4, N2O	0.151118	0.097004	3	0.257335	0.122091	3							0.00127895	0.000723349
Qin et al., 2016	FIELD	>2 years	Straw	350-500	8.1	alcaline	12.5	Low			Coarse	yes	7	7			6.92929	6.92929	neutral				1:5 water	20						ND	2.67	>1% ≤10%			CH4, N2O	0.0733862	0.0543557	3	0.257335	0.122091	3							0.000686065	0.000937427
Qin et al., 2016	FIELD	>2 years	Straw	350-500	8.1	alcaline	12.5	Low			Coarse	yes	7	7			6.92929	6.92929	neutral				1:5 water	5						ND	2.67	>1% ≤10%			CH4, N2O	0.128909	0.0819517	3	0.158843	0.0894778	3							0.00066289	8.19517e-05
Qin et al., 2016	FIELD	>2 years	Straw	350-500	8.1	alcaline	12.5	Low			Coarse	yes	7	7			6.92929	6.92929	neutral				1:5 water	10						ND	2.67	>1% ≤10%			CH4, N2O	0.136151	0.0894778	3	0.158843	0.0894778	3							0.000419074	8.94778e-05
Qin et al., 2016	FIELD	>2 years	Straw	350-500	8.1	alcaline	12.5	Low			Coarse	yes	7	7			6.92929	6.92929	neutral				1:5 water	20						ND	2.67	>1% ≤10%			CH4, N2O	0.086422	0.0501745	3	0.158843	0.0894778	3							0.000445628	5.01745e-05
Qin et al., 2016	FIELD	>2 years	Straw	350-500	8.1	alcaline	12.5	Low			Coarse	yes	7	7			6.92929	6.92929	neutral				1:5 water	5						ND	2.67	>1% ≤10%			CH4, N2O	0.0574537	0.045157	3	0.064213	0.0501745	3							0.00766403	0.00529592
Qin et al., 2016	FIELD	>2 years	Straw	350-500	8.1	alcaline	12.5	Low			Coarse	yes	7	7			6.92929	6.92929	neutral				1:5 water	10						ND	2.67	>1% ≤10%			CH4, N2O	0.0791799	0.0794429	3	0.064213	0.0501745	3							0.00885753	0.00382413
Qin et al., 2016	FIELD	>2 years	Straw	350-500	8.1	alcaline	12.5	Low			Coarse	yes	7	7			6.92929	6.92929	neutral				1:5 water	20						ND	2.67	>1% ≤10%			CH4, N2O	0.0632474	0.0702443	3	0.064213	0.0501745	3							0.00944655	0.0060778
Qin et al., 2016	FIELD	>2 years	Straw	350-500	8.1	alcaline	12.5	Low			Coarse	yes	7	7			6.92929	6.92929	neutral				1:5 water	5						ND	2.67	>1% ≤10%			CH4, N2O	0.0579365	0.0117074	3	0.071455	0.00752617	3							0.00510324	0.000560282
Qin et al., 2016	FIELD	>2 years	Straw	350-500	8.1	alcaline	12.5	Low			Coarse	yes	7	7			6.92929	6.92929	neutral				1:5 water	10						ND	2.67	>1% ≤10%			CH4, N2O	0.0352447	0.00585369	3	0.071455	0.00752617	3							0.00400196	0.000372964
Qin et al., 2016	FIELD	>2 years	Straw	350-500	8.1	alcaline	12.5	Low			Coarse	yes	7	7			6.92929	6.92929	neutral				1:5 water	20						ND	2.67	>1% ≤10%			CH4, N2O	0.0415212	0.00167248	3	0.071455	0.00752617	3							0.00589601	0.000931573
Qin et al., 2016	FIELD	>2 years	Straw	350-500	8.1	alcaline	12.5	Low			Coarse	yes	7	7			6.92929	6.92929	neutral				1:5 water	5						ND	2.67	>1% ≤10%			CH4, N2O	0.0946296	0.0317772	3	0.124563	0.0426483	3							0.00209054	0.00129701
Qin et al., 2016	FIELD	>2 years	Straw	350-500	8.1	alcaline	12.5	Low			Coarse	yes	7	7			6.92929	6.92929	neutral				1:5 water	10						ND	2.67	>1% ≤10%			CH4, N2O	0.0922156	0.0577007	3	0.124563	0.0426483	3							0.00155222	0.00201785
Qin et al., 2016	FIELD	>2 years	Straw	350-500	8.1	alcaline	12.5	Low			Coarse	yes	7	7			6.92929	6.92929	neutral				1:5 water	20						ND	2.67	>1% ≤10%			CH4, N2O	0.073869	0.0259235	3	0.124563	0.0426483	3							0.00186942	0.00168837
Qin et al., 2016	FIELD	>2 years	Straw	350-500	8.1	alcaline	12.5	Low			Coarse	yes	7	7			6.92929	6.92929	neutral				1:5 water	5						ND	2.67	>1% ≤10%			CH4, N2O	0.0617989	0.0342859	3	0.0709722	0.0326134	3							0.00385036	0.00268434
Qin et al., 2016	FIELD	>2 years	Straw	350-500	8.1	alcaline	12.5	Low			Coarse	yes	7	7			6.92929	6.92929	neutral				1:5 water	10						ND	2.67	>1% ≤10%			CH4, N2O	0.0516601	0.0434846	3	0.0709722	0.0326134	3							0.00379484	0.00273535
Qin et al., 2016	FIELD	>2 years	Straw	350-500	8.1	alcaline	12.5	Low			Coarse	yes	7	7			6.92929	6.92929	neutral				1:5 water	20						ND	2.67	>1% ≤10%			CH4, N2O	0.0477976	0.0175611	3	0.0709722	0.0326134	3							0.00260666	0.00142077
Senbayram et al., 2018	INCUBATION	≤3 months	Wood	<300	7.35	neutral	1060	high			Fine	yes	7.9	7.9	7.9	8	8.0579	8.06	alcaline	8.0579	8.16	alcaline	ND	4						ND	2.028	>1% ≤10%			CO2, N2O							32.0993	0.441531	3	29.6301	0.882818	3	0.00987671	0.441531
Senbayram et al., 2018	INCUBATION	≤3 months	Residues	<300	9.24	strongly alcaline	1060	high			Fine	yes	7.9	7.9	7.8	8	8.0579	8.06	alcaline	7.9608	8.16	alcaline	ND	4						ND	2.028	>1% ≤10%			CO2, N2O							30.8647	1.17709	3	29.6301	0.882818	3	0.010494	1.17709
Senbayram et al., 2018	INCUBATION	≤3 months	Residues	<300	8.46	alcaline	880	medium			Fine	yes	7.9	7.9	7.85	8	8.0579	8.06	alcaline	8.00935	8.16	alcaline	ND	4						ND	2.028	>1% ≤10%			CO2, N2O							32.0993	1.8392	3	29.6301	0.882818	3	0.0117286	1.8392
Senbayram et al., 2018	INCUBATION	≤3 months	Residues	<300	9.72	strongly alcaline	4540	high			Fine	yes	7.9	7.9	7.95	8	8.0579	8.06	alcaline	8.10645	8.16	alcaline	ND	4						ND	2.028	>1% ≤10%			CO2, N2O							30.8647	1.32434	3	29.6301	0.882818	3	0.00987671	1.32434
Senbayram et al., 2018	INCUBATION	≤3 months	Wood	<300	7.35	neutral	1060	high			Coarse	yes	5.3	5.3	5	5.2	5.5333	5.53	acid	5.242	5.44	acid	ND	4						ND	1.2675	>1% ≤10%			CO2, N2O							17.2842	0.621613	3	29.6301	0.882818	3	0.0296301	0.621613
Senbayram et al., 2018	INCUBATION	≤3 months	Residues	<300	9.24	strongly alcaline	1060	high			Coarse	yes	5.3	5.3	5.5	5.2	5.5333	5.53	acid	5.7275	5.44	acid	ND	4						ND	1.2675	>1% ≤10%			CO2, N2O							24.6918	1.30549	3	29.6301	0.882818	3	0.0500008	1.30549
Senbayram et al., 2018	INCUBATION	≤3 months	Residues	<300	8.46	alcaline	880	medium			Coarse	yes	5.3	5.3	5.4	5.2	5.5333	5.53	acid	5.6304	5.44	acid	ND	4						ND	1.2675	>1% ≤10%			CO2, N2O							18.8275	1.11891	3	29.6301	0.882818	3	0.0117286	1.11891
Senbayram et al., 2018	INCUBATION	≤3 months	Residues	<300	9.72	strongly alcaline	4540	high			Coarse	yes	5.3	5.3	6.1	5.2	5.5333	5.53	acid	6.3101	5.44	acid	ND	4						ND	1.2675	>1% ≤10%			CO2, N2O							25.9264	0.808097	3	29.6301	0.882818	3	0.0120372	0.808097
Sial et al., 2018	INCUBATION	≤3 months	Residues	300-500	10.88	strongly alcaline	2052	high			Fine	no	8.2	8.2	8.32	8.22	8.2	8.2	alcaline	8.32	8.22	alcaline	1:2.5 water		1	181	medium			organic carbon	0.889	≤1%	1.653	>1% ≤10%	CH4, CO2, N2O	1.97531e-10	2.53348e-11	3	1.18519e-10	3.51872e-11	3	9.87654e-05	1.00889e-05	3	3.7037e-05	4.24798e-06	3	5.18519e-08	7.60399e-09
Sial et al., 2018	INCUBATION	≤3 months	Residues	300-500	10.88	strongly alcaline	2052	high			Fine	no	8.2	8.2	8.67	8.22	8.2	8.2	alcaline	8.67	8.22	alcaline	1:2.5 water		2	181	medium			organic carbon	0.889	≤1%	2.199	>1% ≤10%	CH4, CO2, N2O	2.61728e-10	4.64471e-11	3	1.18519e-10	3.51872e-11	3	9.38272e-05	1.22129e-05	3	3.7037e-05	4.24798e-06	3	3.7037e-08	5.35771e-09
Suddick & Six, 2013	FIELD	>1 year ≤2 years	Residues	>700	9.7	strongly alcaline			221.7	high	Coarse	yes	7.8	7.8	8.3	8.3	7.9608	7.96	alcaline	8.4463	8.45	alcaline	1:1 water	5						total carbon	1.352	>1% ≤10%	1.4534	>1% ≤10%	N2O													0.000481489	2.31485e-05
Suddick & Six, 2013	FIELD	>1 year ≤2 years	Residues	>700	9.7	strongly alcaline			221.7	high	Coarse	yes	7.8	7.8	8.3	8.3	7.9608	7.96	alcaline	8.4463	8.45	alcaline	1:1 water	2.5						total carbon	1.352	>1% ≤10%	1.2844	>1% ≤10%	N2O													0.000421303	9.25941e-06
Wang et al., 2020	INCUBATION	≤3 months	Straw	300-500	9.4	strongly alcaline					Coarse	yes	5.2	5.2			5.2	5.2	acid				1:2.5 water		0.5					ND	0.00041	≤1%			CO2, N2O							0.123869	0.00339787	3	0.120879	0.0155724	3	6.65823e-05	0.00448949
Wang et al., 2020	INCUBATION	≤3 months	Straw	300-500	9.4	strongly alcaline					Coarse	yes	5.2	5.2			5.2	5.2	acid				1:2.5 water		1					ND	0.00041	≤1%			CO2, N2O							0.130631	0.00707823	3	0.120879	0.0155724	3	6.92511e-05	0.00411592
Wang et al., 2020	INCUBATION	≤3 months	Straw	300-500	9.4	strongly alcaline					Coarse	yes	5.2	5.2			5.2	5.2	acid				1:2.5 water		2					ND	0.00041	≤1%			CO2, N2O							0.155501	0.00849354	3	0.120879	0.0155724	3	5.81038e-05	0.00673576
Wang et al., 2020	INCUBATION	≤3 months	Straw	300-500	9.4	strongly alcaline					Coarse	yes	5.2	5.2			5.2	5.2	acid				1:2.5 water		0.5					ND	0.00041	≤1%			CO2, N2O							0.158433	0.00849386	3	0.105271	0.00368003	3	9.89723e-05	0.00710993
Wang et al., 2020	INCUBATION	≤3 months	Straw	300-500	9.4	strongly alcaline					Coarse	yes	5.2	5.2			5.2	5.2	acid				1:2.5 water		1					ND	0.00041	≤1%			CO2, N2O							0.164064	0.00198191	3	0.105271	0.00368003	3	0.000106495	0.0134703
Wang et al., 2020	INCUBATION	≤3 months	Straw	300-500	9.4	strongly alcaline					Coarse	yes	5.2	5.2			5.2	5.2	acid				1:2.5 water		2					ND	0.00041	≤1%			CO2, N2O							0.164413	0.00396349	3	0.105271	0.00368003	3	0.000106555	0.0142186
Wang et al., 2020	INCUBATION	≤3 months	Straw	300-500	9.4	strongly alcaline					Coarse	yes	5.2	5.2			5.2	5.2	acid				1:2.5 water		0.5					ND	0.00041	≤1%			CO2, N2O							0.182058	0.00792794	3	0.153417	0.0116076	3	0.000111201	0.0119724
Wang et al., 2020	INCUBATION	≤3 months	Straw	300-500	9.4	strongly alcaline					Coarse	yes	5.2	5.2			5.2	5.2	acid				1:2.5 water		1					ND	0.00041	≤1%			CO2, N2O							0.171845	0.011042	3	0.153417	0.0116076	3	0.000108645	0.00748411
Wang et al., 2020	INCUBATION	≤3 months	Straw	300-500	9.4	strongly alcaline					Coarse	yes	5.2	5.2			5.2	5.2	acid				1:2.5 water		2					ND	0.00041	≤1%			CO2, N2O							0.19068	0.00396412	3	0.153417	0.0116076	3	0.000102352	0.000374175
Wang et al., 2020	INCUBATION	≤3 months	Straw	300-500	9.4	strongly alcaline					Coarse	yes	5.2	5.2			5.2	5.2	acid				1:2.5 water		0.5					ND	0.00041	≤1%			CO2, N2O							0.163055	0.0101933	3	0.173645	0.0096267	3	0.000145835	0.0104769
Wang et al., 2020	INCUBATION	≤3 months	Straw	300-500	9.4	strongly alcaline					Coarse	yes	5.2	5.2			5.2	5.2	acid				1:2.5 water		1					ND	0.00041	≤1%			CO2, N2O							0.190565	0.00453008	3	0.173645	0.0096267	3	0.000119752	0.00486489
Wang et al., 2020	INCUBATION	≤3 months	Straw	300-500	9.4	strongly alcaline					Coarse	yes	5.2	5.2			5.2	5.2	acid				1:2.5 water		2					ND	0.00041	≤1%			CO2, N2O							0.186763	0.00594539	3	0.173645	0.0096267	3	0.000103753	0.00860478
Wang et al., 2017	INCUBATION	≤3 months	Straw	300-500	9.4	strongly alcaline					Fine	no	5.9	5.9	7	6.5	6.70821	6.71	neutral	7.77631	7.29	alcaline	1:10 water		3					organic carbon	0.95485	≤1%			CH4, N2O	0.534366	2.46914e-05	3	0.309148	0.00217698	3							0.0470468	0.0470468
Wang et al., 2017	INCUBATION	≤3 months	Straw	300-500	9.4	strongly alcaline					Fine	no	5.9	5.9	7.5	6.5	6.70821	6.71	neutral	8.26181	7.29	alcaline	1:10 water		3					organic carbon	0.95485	≤1%			CH4, N2O	0.360107	2.46914e-05	3	0.309148	0.00217698	3							0.00820123	0.00820123
Wang et al., 2017	INCUBATION	≤3 months	Straw	300-500	9.4	strongly alcaline					Fine	no	5.9	5.9	7.7	6.5	6.70821	6.71	neutral	8.45601	7.29	alcaline	1:10 water		3					organic carbon	0.95485	≤1%			CH4, N2O	0.375607	0.00160494	3	0.309148	0.00217698	3							0.00598178	0.00598178
Yang et al., 2020	INCUBATION	≤3 months	Straw	300-500	10.17	strongly alcaline			301.82	high	Fine	yes	6.42	6.42	7.25	6.9	6.42	6.42	acid	7.25	6.9	neutral	1:2.5 water		1					ND	0.001744	≤1%			N2O													3.3163	0.395556
Yang et al., 2020	INCUBATION	≤3 months	Straw	300-500	10.17	strongly alcaline			301.82	high	Fine	yes	6.42	6.42	7.45	6.9	6.42	6.42	acid	7.45	6.9	neutral	1:2.5 water		5					ND	0.001744	≤1%			N2O													1.34593	0.1
Yang et al., 2020	INCUBATION	≤3 months	Manure	300-500	9.98	strongly alcaline			187.54	medium	Fine	yes	6.42	6.42	7.35	6.9	6.42	6.42	acid	7.35	6.9	neutral	1:2.5 water		1					ND	0.001744	≤1%			N2O													2.67852	0.504444
Yang et al., 2020	INCUBATION	≤3 months	Manure	300-500	9.98	strongly alcaline			187.54	medium	Fine	yes	6.42	6.42	8.1	6.9	6.42	6.42	acid	8.1	6.9	alcaline	1:2.5 water		5					ND	0.001744	≤1%			N2O													0.434815	0.0533333
Yang et al., 2020	INCUBATION	≤3 months	Straw	300-500	10.17	strongly alcaline			301.82	high	Fine	yes	6.42	6.42	7.14	6.8	6.42	6.42	acid	7.14	6.8	neutral	1:2.5 water		1					ND	0.001744	≤1%			N2O													0.928148	0.0888889
Yang et al., 2020	INCUBATION	≤3 months	Straw	300-500	10.17	strongly alcaline			301.82	high	Fine	yes	6.42	6.42	7.18	6.8	6.42	6.42	acid	7.18	6.8	neutral	1:2.5 water		5					ND	0.001744	≤1%			N2O													0.791111	0.0355556
Yang et al., 2020	INCUBATION	≤3 months	Manure	300-500	9.98	strongly alcaline			187.54	medium	Fine	yes	6.42	6.42	7.4	6.8	6.42	6.42	acid	7.4	6.8	neutral	1:2.5 water		1					ND	0.001744	≤1%			N2O													1.16074	0.0355556
Yang et al., 2020	INCUBATION	≤3 months	Manure	300-500	9.98	strongly alcaline			187.54	medium	Fine	yes	6.42	6.42	7.51	6.8	6.42	6.42	acid	7.51	6.8	neutral	1:2.5 water		5					ND	0.001744	≤1%			N2O													0.931852	0.273333
Yang et al., 2020	INCUBATION	≤3 months	Straw	300-500	10.17	strongly alcaline			301.82	high	Fine	yes	6.42	6.42	7.13	6.5	6.42	6.42	acid	7.13	6.5	neutral	1:2.5 water		1					ND	0.001744	≤1%			N2O													0.895556	0.0466667
Yang et al., 2020	INCUBATION	≤3 months	Straw	300-500	10.17	strongly alcaline			301.82	high	Fine	yes	6.42	6.42	7.25	6.5	6.42	6.42	acid	7.25	6.5	neutral	1:2.5 water		5					ND	0.001744	≤1%			N2O													0.922222	0.0177778
Yang et al., 2020	INCUBATION	≤3 months	Manure	300-500	9.98	strongly alcaline			187.54	medium	Fine	yes	6.42	6.42	7.12	6.5	6.42	6.42	acid	7.12	6.5	neutral	1:2.5 water		1					ND	0.001744	≤1%			N2O													0.948889	0.0533333
Yang et al., 2020	INCUBATION	≤3 months	Manure	300-500	9.98	strongly alcaline			187.54	medium	Fine	yes	6.42	6.42	7.45	6.5	6.42	6.42	acid	7.45	6.5	neutral	1:2.5 water		5					ND	0.001744	≤1%			N2O													1.00815	0.106667
Zhang et al., 2010a	FIELD	> 3 months ≤1 year	Straw	300-500	10.4	strongly alcaline					Fine	yes	6.5	6.5	6.67	6.48	6.42424	6.42	acid	6.59596	6.4	neutral	1:5 water	10						organic carbon	2.4	>1% ≤10%	2.59	>1% ≤10%	CH4, N2O	0.113758	0.00220462	3	0.0690047	0.00198416	3							0.000606271	6.61387e-05
Zhang et al., 2010a	FIELD	> 3 months ≤1 year	Straw	300-500	10.4	strongly alcaline					Fine	yes	6.5	6.5	6.94	6.48	6.42424	6.42	acid	6.86869	6.4	neutral	1:5 water	40						organic carbon	2.4	>1% ≤10%	3.69	>1% ≤10%	CH4, N2O	0.115632	0.011464	3	0.0690047	0.00198416	3							0.000661387	7.71618e-05
Zhang et al., 2010a	FIELD	> 3 months ≤1 year	Straw	300-500	10.4	strongly alcaline					Fine	yes	6.5	6.5	6.75	6.53	6.42424	6.42	acid	6.67677	6.45	neutral	1:5 water	10						organic carbon	2.4	>1% ≤10%	2.71	>1% ≤10%	CH4, N2O	0.0740753	0.0103617	3	0.0763902	0.00848779	3							0.00131175	1.10231e-05
Zhang et al., 2010a	FIELD	> 3 months ≤1 year	Straw	300-500	10.4	strongly alcaline					Fine	yes	6.5	6.5	6.77	6.53	6.42424	6.42	acid	6.69697	6.45	neutral	1:5 water	40						organic carbon	2.4	>1% ≤10%	3.6	>1% ≤10%	CH4, N2O	0.117947	0.0138891	3	0.0763902	0.00848779	3							0.00108026	0.000220462
Zhang et al., 2011b	FIELD	≤3 months	Straw	300-500	10.4	strongly alcaline			8.92	low	Medium	yes	8.38	8.38	8.24	8.15	8.52398	8.52	alcaline	8.38804	8.3	alcaline	1:1 water	20						organic carbon	9.87	>1% ≤10%	1.57	>1% ≤10%	CH4, CO2, N2O	0.000396832	0.000187393	3	-0.000132277	5.51155e-05	3	1.88407	0.0109129	3	1.83149	0.121254	3	0.000264555	2.20462e-05
Zhang et al., 2011b	FIELD	≤3 months	Straw	300-500	10.4	strongly alcaline			8.92	low	Medium	yes	8.38	8.38	8.38	8.15	8.52398	8.52	alcaline	8.52398	8.3	alcaline	1:1 water	40						organic carbon	9.87	>1% ≤10%	1.72	>1% ≤10%	CH4, CO2, N2O	-0.000606271	0.000165347	3	-0.000132277	5.51155e-05	3	2.05118	0.0275578	3	1.83149	0.121254	3	0.000253532	3.30693e-05
Zhang et al., 2011b	FIELD	≤3 months	Straw	300-500	10.4	strongly alcaline			8.92	low	Medium	yes	8.38	8.38	8.38	8.28	8.52398	8.52	alcaline	8.52398	8.43	alcaline	1:1 water	20						organic carbon	9.87	>1% ≤10%	1.45	>1% ≤10%	CH4, CO2, N2O	-0.0001433	5.51155e-05	3	-0.000429901	6.61387e-05	3	1.67584	0.0617294	3	1.65523	0.135584	3	0.00120152	6.61387e-05
Zhang et al., 2011b	FIELD	≤3 months	Straw	300-500	10.4	strongly alcaline			8.92	low	Medium	yes	8.38	8.38	8.23	8.28	8.52398	8.52	alcaline	8.37833	8.43	alcaline	1:1 water	40						organic carbon	9.87	>1% ≤10%	1.65	>1% ≤10%	CH4, CO2, N2O	-0.000121254	5.51155e-05	3	-0.000429901	6.61387e-05	3	1.615	0.035274	3	1.65523	0.135584	3	0.000782641	5.51155e-05
[truncated: 9 more columns]

## Sheet: Metadata Metals
																	Initial																		Final
Author(s)	Experiment type	Experiment period	Biochar feedstock	Pyrolosis temperature (°C) Group	Biochar pH Group	Biochar SSA BET area (m2/g) Group	Soil Texture	pH (initial) classification	pH (final) classification	Biochar rate (t/ha)	Biochar rate (%)	Soil EC (μS/cm) Group - Initial	Soil EC (μS/cm) Group - Final	% Soil Organic Carbon (SOC) Group-Initial	% Soil Organic Carbon (SOC) Group-Final	Metal (oids)	P (mg/kg)	P (mg/kg) Group Initial	As (mg/kg)	As (mg/kg) Group Initial	K (mg/kg)	K (mg/kg) Group Initial	Cd (mg/kg)	Cd (mg/kg) Group Initial	Pb (mg/kg)	Pb (mg/kg) Group Initial	Cu (mg/kg)	Cu (mg/kg) Group Initial	Ni (mg/kg)	Ni (mg/kg) Group Initial	Zn (mg/kg)	Zn (mg/kg) Group Initial	Cr (mg/kg)	Cr (mg/kg) Group Initial	Cd (mg/kg) (T)	Cd (mg/kg) SD (T)	Cd (mg/kg) n (T)	Cd (mg/kg) (C)	Cd (mg/kg) SD (C)	Cd (mg/kg) n (C)	Pb (mg/kg) (T)	Pb (mg/kg) SD (T)	Pb (mg/kg) n (T)	Pb (mg/kg) (C)	Pb (mg/kg) SD (C)	Pb (mg/kg) n (C)	Cu (mg/kg) (T)	Cu (mg/kg) SD (T)	Cu (mg/kg) n (T)
Wan et al., 2021	POT	> 3 months ≤1 year	Grass	501-700	alcaline	high	Coarse	acid			1						200	>50 mg/kg ≤500 mg/kg			30	≤50 mg/kg			15	≤50 mg/kg					20	≤50 mg/kg
Wan et al., 2021	POT	> 3 months ≤1 year	Grass	501-700	alcaline	high	Coarse	acid			3						200	>50 mg/kg ≤500 mg/kg			30	≤50 mg/kg			15	≤50 mg/kg					20	≤50 mg/kg
Wan et al., 2021	POT	> 3 months ≤1 year	Grass	501-700	alcaline	high	Coarse	acid			1
Wan et al., 2021	POT	> 3 months ≤1 year	Grass	501-700	alcaline	high	Coarse	acid			3
Wan et al., 2021	POT	> 3 months ≤1 year	Grass	501-700	alcaline	high	Coarse	acid			1
Wan et al., 2021	POT	> 3 months ≤1 year	Grass	501-700	alcaline	high	Coarse	acid			3
Li et al., 2021	INCUBATION	> 3 months ≤1 year	Straw	Level 3		low		alcaline	alcaline		Level 1				>1% ≤10%	Cd, Pb, Zn							1.57	≤5 mg/kg	1660.2	>500 mg/kg					2556.6	>500 mg/kg			24.8312	0.318584	3	30	0.849556	3	1056.8	41.5464	3	1837.6	51.3328	3
Li et al., 2021	INCUBATION	> 3 months ≤1 year	Straw	Level 4		medium		alcaline	alcaline		Level 1				>1% ≤10%	Cd, Pb, Zn							30.6	>5 mg/kg ≤50 mg/kg	1558	>500 mg/kg					2452.4	>500 mg/kg			19.498	0.353983	3	30	0.849556	3	772	48.8886	3	1837.6	51.3328	3
Li et al., 2021	INCUBATION	> 3 months ≤1 year	Straw	Level 3		medium		alcaline	alcaline		Level 1				>1% ≤10%	Cd, Pb, Zn							28.6	>5 mg/kg ≤50 mg/kg	1362.8	>500 mg/kg					2250	>500 mg/kg			18	0.318584	3	30	0.849556	3	438	29.3331	3	1837.6	51.3328	3
Li et al., 2021	INCUBATION	> 3 months ≤1 year	Straw	Level 4		medium		alcaline	alcaline		Level 1				>1% ≤10%	Cd, Pb, Zn							27	>5 mg/kg ≤50 mg/kg	1235.4	>500 mg/kg					2125.8	>500 mg/kg			15.392	0.424778	3	30	0.849556	3	133.6	26.8887	3	1837.6	51.3328	3
Li et al., 2021	INCUBATION	> 3 months ≤1 year	Straw	Level 3		medium		alcaline	alcaline		Level 1				>1% ≤10%	Cd, Pb, Zn							28.6	>5 mg/kg ≤50 mg/kg	1277.8	>500 mg/kg					2168	>500 mg/kg			16.832	0.60177	3	30	0.849556	3	197.4	21.9824	3	1837.6	51.3328	3
Li et al., 2021	INCUBATION	> 3 months ≤1 year	Straw	Level 4		medium		alcaline	alcaline		Level 1				>1% ≤10%	Cd, Pb, Zn							24.6	>5 mg/kg ≤50 mg/kg	1168	>500 mg/kg					2084	>500 mg/kg			12.46	0.60177	3	30	0.849556	3	74.6	17.111	3	1837.6	51.3328	3
Ducey et al., 2021	POT	≤3 months	Manure	Level 2	strongly alcaline		Medium	acid	acid		Level 1		high			Cd concentration, Zn																			1.74	0.087	3	2.05	0.1025	3
Ducey et al., 2021	POT	≤3 months	Manure	Level 2	strongly alcaline		Medium	acid	acid		Level 1		high			Cd concentration, Zn																			1.08	0.054	3	2.05	0.1025	3
Ducey et al., 2021	POT	≤3 months	Manure	Level 2	strongly alcaline		Medium	acid	acid		Level 1		high			Cd concentration, Zn																			1.69	0.0845	3	2.05	0.1025	3
Ducey et al., 2021	POT	≤3 months	Manure	Level 2	strongly alcaline		Medium	acid	acid		Level 1		high			Cd concentration, Zn																			0.93	0.0465	3	2.05	0.1025	3
Ducey et al., 2021	POT	≤3 months	Manure	Level 2	strongly alcaline		Medium	acid	acid		Level 1		high			Cd concentration, Zn																			3.35	0.1675	3	2.05	0.1025	3
Ducey et al., 2021	POT	≤3 months	Manure	Level 2	strongly alcaline		Medium	acid	acid		Level 1		high			Cd concentration, Zn																			1.49	0.0745	3	2.05	0.1025	3
Ducey et al., 2021	POT	≤3 months	Manure	Level 2	strongly alcaline		Medium	acid	acid		Level 1		high			Cd concentration, Zn																			1.19	0.0595	3	2.05	0.1025	3
Ducey et al., 2021	POT	≤3 months	Manure	Level 2	strongly alcaline		Medium	acid	neutal		Level 1		high			Cd concentration, Zn																			0.64	0.032	3	2.05	0.1025	3
Campos et al., 2021	FIELD	>2 years	Residues	Level 2	strongly alcaline	high	Coarse	acid	acid	Level 1			high	≤1%	>1% ≤10%	Pb, Cu, Fe, Ni, As, Zn							1.28	≤5 mg/kg	569	>500 mg/kg	240.6	>100 mg/kg	15.6	>5 mg/kg ≤50 mg/kg	249.3	>50 mg/kg ≤500 mg/kg									4.669	1.58654	3	1	0.324519	3	19.069	7.09424	3
Campos et al., 2021	FIELD	>2 years	Residues	Level 2	strongly alcaline	high	Coarse	acid	acid	Level 1			high	≤1%	>1% ≤10%	Pb, Cu, Fe, Ni, As, Zn							1.28	≤5 mg/kg	569	>500 mg/kg	240.6	>100 mg/kg	15.6	>5 mg/kg ≤50 mg/kg	249.3	>50 mg/kg ≤500 mg/kg									6.226	3.93029	3	1	0.324519	3	16.279	7.7911	3
Campos et al., 2021	FIELD	>2 years	Wood	Level 3	strongly alcaline	high	Coarse									Pb, Cu, Fe, Ni, As, Zn							1.28	≤5 mg/kg	569	>500 mg/kg	240.6	>100 mg/kg	15.6	>5 mg/kg ≤50 mg/kg	249.3	>50 mg/kg ≤500 mg/kg									9.533	5.73317	3	4	0.240383	3	31.395	23.2566	3
Campos et al., 2021	FIELD	>2 years	Residues	Level 2	strongly alcaline	high	Coarse	acid	neutral	Level 1			low	>1% ≤10%	>1% ≤10%	Pb, Cu, Fe, Ni, As, Zn							1.56	≤5 mg/kg	156.5	>50 mg/kg ≤500 mg/kg	215.5	>100 mg/kg	15.6	>5 mg/kg ≤50 mg/kg	293.5	>50 mg/kg ≤500 mg/kg									18.19	4.72356	3	1	0.324519	3	22.558	5.34924	3
Campos et al., 2021	FIELD	>2 years	Residues	Level 2	strongly alcaline	high	Coarse	acid	neutral	Level 1			low	>1% ≤10%	>1% ≤10%	Pb, Cu, Fe, Ni, As, Zn							1.56	≤5 mg/kg	156.5	>50 mg/kg ≤500 mg/kg	215.5	>100 mg/kg	15.6	>5 mg/kg ≤50 mg/kg	293.5	>50 mg/kg ≤500 mg/kg									2.529	0.144231	3	1	0.324519	3	9.767	3.02366	3
Campos et al., 2021	FIELD	>2 years	Wood	Level 3	strongly alcaline	high	Coarse									Pb, Cu, Fe, Ni, As, Zn							1.56	≤5 mg/kg	156.5	>50 mg/kg ≤500 mg/kg	215.5	>100 mg/kg	15.6	>5 mg/kg ≤50 mg/kg	293.5	>50 mg/kg ≤500 mg/kg									8.56	5.04808	3	4	0.240383	3	42.093	4.06977	3
Campos et al., 2021	FIELD	>2 years	Residues	300-500	strongly alcaline	high	Coarse		acid	8			medium		≤1%
Campos et al., 2021	FIELD	>2 years	Residues	300-500	strongly alcaline	high	Coarse		acid	8			medium		≤1%
Campos et al., 2021	FIELD	>2 years	Wood	501-700	strongly alcaline	high	Coarse
Campos et al., 2021	FIELD	>2 years	Residues	300-500	strongly alcaline	high	Coarse		neutral	8			medium		≤1%
Campos et al., 2021	FIELD	>2 years	Residues	300-500	strongly alcaline	high	Coarse		neutral	8			medium		>1% ≤10%
Campos et al., 2021	FIELD		Wood	501-700	strongly alcaline	high	Coarse
Song et al., 2021	FIELD	> 3 months ≤1 year	Residues	Level 2	strongly alcaline	medium	Coarse		neutral	Level 2					>1% ≤10%	Cd concentration, Available K, Available P																			0.62	0.0866025	3	0.9	0.001	3
Lan et al., 2021	INCUBATION	≤3 months	Wood	300-500				acid			1		high	≤1%			3.51	≤50 mg/kg	701	>500 mg/kg	101.23	>50 mg/kg ≤500 mg/kg			496	>50 mg/kg ≤500 mg/kg	502	>100 mg/kg			274	>50 mg/kg ≤500 mg/kg	127	>100 mg/kg
Lan et al., 2021	INCUBATION	≤3 months	Wood	300-500				acid			3		medium	≤1%			3.51	≤50 mg/kg	701	>500 mg/kg	101.23	>50 mg/kg ≤500 mg/kg			496	>50 mg/kg ≤500 mg/kg	502	>100 mg/kg			274	>50 mg/kg ≤500 mg/kg	127	>100 mg/kg
Lan et al., 2021	INCUBATION	≤3 months	Wood	300-500				neutral			5		medium	≤1%			3.89	≤50 mg/kg			105.36	>50 mg/kg ≤500 mg/kg
Hussain et al., 2021	POT	≤3 months	Residues	300-500	alcaline	low		neutral	neutral		5	high	medium	≤1%	>1% ≤10%		17.72	≤50 mg/kg			80.45	>50 mg/kg ≤500 mg/kg
Hussain et al., 2021	POT	≤3 months	Residues	300-500	alcaline	low		neutral	neutral		5	high	medium	>1% ≤10%	>1% ≤10%		17.12	≤50 mg/kg			100.65	>50 mg/kg ≤500 mg/kg
Haddad & Lemanowicz, 2021	FIELD	≤3 months	Residues	501-700	acid		Fine	alcaline		20		high	medium	>1% ≤10%			1160	>500 mg/kg			12880	>500 mg/kg	0.55	≤5 mg/kg	31.4	≤50 mg/kg			43.7	>5 mg/kg ≤50 mg/kg
Haddad & Lemanowicz, 2021	FIELD	≤3 months	Residues	501-700	acid		Fine	alcaline		40		high	medium	>1% ≤10%			1160	>500 mg/kg			12880	>500 mg/kg	0.55	≤5 mg/kg	31.4	≤50 mg/kg			43.7	>5 mg/kg ≤50 mg/kg
Haddad & Lemanowicz, 2021	FIELD	≤3 months	Residues	501-700	acid		Coarse	alcaline		20		high		≤1%
Haddad & Lemanowicz, 2021	FIELD	≤3 months	Residues	501-700	acid		Coarse	alcaline		40		high	high	≤1%
Bandara et al., 2021	INCUBATION	≤3 months	Manure	Level 3	strongly alcaline	high	Medium	acid	alcaline		Level 1	medium	low	>10%	>10%	As, Cd			100	>50 mg/kg ≤500 mg/kg			100	>50 mg/kg											3	0	3	15	0.43	3
Bandara et al., 2021	INCUBATION	≤3 months	Manure	Level 3	strongly alcaline	high	Medium	acid	alcaline		Level 1	medium	low	>10%	>10%	As, Cd			100	>50 mg/kg ≤500 mg/kg			100	>50 mg/kg											2	0	3	4.8	0	3
Bandara et al., 2021	INCUBATION	≤3 months	Manure	Level 3	strongly alcaline	high	Medium	neutral	alcaline		Level 1	medium	low	>10%	>10%	As, Cd			100	>50 mg/kg ≤500 mg/kg			100	>50 mg/kg											1.8	0	3	3	0	3
Bandara et al., 2021	INCUBATION	≤3 months	Manure	Level 3	strongly alcaline	high	Medium	alcaline	strongly alcaline		Level 1	medium	high	>10%	>10%	As, Cd			100	>50 mg/kg ≤500 mg/kg			100	>50 mg/kg											1	0	3	2	0	3
Bandara et al., 2021	INCUBATION	≤3 months	Manure	Level 3	strongly alcaline	high	Medium	alcaline	strongly alcaline		Level 1	medium	medium	>10%	>10%	As, Cd			100	>50 mg/kg ≤500 mg/kg			100	>50 mg/kg											1	0	3	2	0	3
Bandara et al., 2021	INCUBATION	≤3 months	Wood	Level 3	strongly alcaline	high	Medium	acid	neutral		Level 1	medium	high	>10%	>1% ≤10%	As, Cd			100	>50 mg/kg ≤500 mg/kg			100	>50 mg/kg											5	0	3	15	0.43	3
Bandara et al., 2021	INCUBATION	≤3 months	Wood	Level 3	strongly alcaline	high	Medium	acid	neutral		Level 1	medium	high	>10%	>1% ≤10%	As, Cd			100	>50 mg/kg ≤500 mg/kg			100	>50 mg/kg											3	0.86	3	4.8	0	3
Bandara et al., 2021	INCUBATION	≤3 months	Wood	Level 3	strongly alcaline	high	Medium	neutral	alcaline		Level 1	medium	medium	>10%	>10%	As, Cd			100	>50 mg/kg ≤500 mg/kg			100	>50 mg/kg											2	0	3	3	0	3
Bandara et al., 2021	INCUBATION	≤3 months	Wood	Level 3	strongly alcaline	high	Medium	alcaline	alcaline		Level 1	medium	high	>10%	>10%	As, Cd			100	>50 mg/kg ≤500 mg/kg			100	>50 mg/kg											1.2	0	3	2	0	3
Bandara et al., 2021	INCUBATION	≤3 months	Wood	Level 3	strongly alcaline	high	Medium	alcaline	alcaline		Level 1	medium	high	>10%	>10%	As, Cd			100	>50 mg/kg ≤500 mg/kg			100	>50 mg/kg											1.3	0	3	2	0	3
Wang et al., 2021	INCUBATION	≤3 months	Straw	Level 2	alcaline		Fine	acid	acid		Level 1		medium			Cd							2.8	≤5 mg/kg											0.34	0.0174824	3	0.8	0.0611852	3
Wang et al., 2021	INCUBATION	≤3 months	Straw	Level 2	neutral		Fine	acid	acid		Level 1		medium			Cd							2.8	≤5 mg/kg											0.33	0.0415208	3	0.8	0.0611852	3
Wang et al., 2021	INCUBATION	≤3 months	Straw	Level 2	alcaline		Fine	acid	neutral		Level 1		medium			Cd							2.8	≤5 mg/kg											0.24	0.0349649	3	0.8	0.0611852	3
Wang et al., 2021	INCUBATION	≤3 months	Straw	Level 2	alcaline		Fine	acid	neutral		Level 1		medium			Cd							2.8	≤5 mg/kg											0.22	0.0174824	3	0.8	0.0611852	3
Wang et al., 2021	INCUBATION	≤3 months	Straw	Level 2	alcaline		Fine	neutral	neutral		Level 1		medium			Cd							2.8	≤5 mg/kg											0.28	0.00655592	3	0.43	0.0327862	3
Wang et al., 2021	INCUBATION	≤3 months	Straw	Level 2	neutral		Fine	acid	neutral		Level 1		medium			Cd							2.8	≤5 mg/kg											0.16	0.0109265	3	0.43	0.0327862	3
Wang et al., 2021	INCUBATION	≤3 months	Straw	Level 2	alcaline		Fine	neutral	neutral		Level 1		medium			Cd							2.8	≤5 mg/kg											0.05	0.0131085	3	0.43	0.0327862	3
Wang et al., 2021	INCUBATION	≤3 months	Straw	Level 2	alcaline		Fine	neutral	neutral		Level 1					Cd							2.8	≤5 mg/kg											0.1	0.00874123	3	0.43	0.0327862	3
Muhammad et al., 2021	INCUBATION	≤3 months	Straw	Level 3	neutral	low	Coarse	neutral	neutral		Level 1	high	high	>1% ≤10%	>1% ≤10%	Cd							4.75	≤5 mg/kg											4.65	0.0603214	3	4.74	0.053595	3
Muhammad et al., 2021	INCUBATION	≤3 months	Straw	Level 3	neutral	low	Coarse	neutral	neutral		Level 1	high	high	>1% ≤10%	>1% ≤10%	Cd							4.7	≤5 mg/kg											4.55	0.107237	3	4.74	0.053595	3
Muhammad et al., 2021	INCUBATION	≤3 months	Straw	Level 3	strongly alcaline	low	Coarse	neutral	alcaline		Level 1	high	high	>1% ≤10%	>1% ≤10%	Cd							4.5	≤5 mg/kg											4.17	0.0737496	3	4.74	0.053595	3
Muhammad et al., 2021	INCUBATION	≤3 months	Straw	Level 3	strongly alcaline	low	Coarse	neutral	alcaline		Level 1	high	high	>1% ≤10%	>1% ≤10%	Cd							4.3	≤5 mg/kg											4.2	0.0670005	3	4.74	0.053595	3
Muhammad et al., 2021	INCUBATION	≤3 months	Straw	Level 3	strongly alcaline	low	Coarse	neutral	alcaline		Level 1	high	high	>1% ≤10%	>1% ≤10%	Cd							4.25	≤5 mg/kg											4.12	0.093786	3	4.74	0.053595	3
Muhammad et al., 2021	INCUBATION	≤3 months	Straw	Level 3	strongly alcaline	low	Coarse	neutral	alcaline		Level 1	high	high	>1% ≤10%	>1% ≤10%	Cd							4.2	≤5 mg/kg											4.1	0.093833	3	4.74	0.053595	3
Muhammad et al., 2021	INCUBATION	≤3 months	Straw	Level 3	neutral	low	Coarse	neutral	neutral		Level 1	high	high	>1% ≤10%	>1% ≤10%	Cd							4.75	≤5 mg/kg											4.54	0.134047	3	4.65	0.0536186	3
Muhammad et al., 2021	INCUBATION	≤3 months	Straw	Level 3	neutral	low	Coarse	neutral	neutral		Level 1	high	high	>1% ≤10%	>1% ≤10%	Cd							4.7	≤5 mg/kg											4.45	0.127297	3	4.65	0.0536186	3
Muhammad et al., 2021	INCUBATION	≤3 months	Straw	Level 3	strongly alcaline	low	Coarse	neutral	alcaline		Level 1	high	high	>1% ≤10%	>1% ≤10%	Cd							4.5	≤5 mg/kg											3.9	0.11394	3	4.65	0.0536186	3
Muhammad et al., 2021	INCUBATION	≤3 months	Straw	Level 3	strongly alcaline	low	Coarse	neutral	alcaline		Level 1	high	high	>1% ≤10%	>1% ≤10%	Cd							4.3	≤5 mg/kg											3.74	0.14075	3	4.65	0.0536186	3
Muhammad et al., 2021	INCUBATION	≤3 months	Straw	Level 3	strongly alcaline	low	Coarse	neutral	alcaline		Level 1	high	high	>1% ≤10%	>1% ≤10%	Cd							4.25	≤5 mg/kg											3.68	0.140773	3	4.65	0.0536186	3
Muhammad et al., 2021	INCUBATION	≤3 months	Straw	Level 3	strongly alcaline	low	Coarse	neutral	alcaline		Level 1	high	high	>1% ≤10%	>1% ≤10%	Cd							4.2	≤5 mg/kg											3.61	0.134047	3	4.65	0.0536186	3
Muhammad et al., 2021	INCUBATION	≤3 months	Straw	Level 3	neutral	low	Coarse	neutral	neutral		Level 1	high	high	>1% ≤10%	>1% ≤10%	Cd							4.75	≤5 mg/kg											4.3	0.127344	3	4.65	0.0602973	3
Muhammad et al., 2021	INCUBATION	≤3 months	Straw	Level 3	neutral	low	Coarse	neutral	neutral		Level 1	high	high	>1% ≤10%	>1% ≤10%	Cd							4.7	≤5 mg/kg											4.2	0.127321	3	4.65	0.0602973	3
Muhammad et al., 2021	INCUBATION	≤3 months	Straw	Level 3	strongly alcaline	low	Coarse	neutral	alcaline		Level 1	high	high	>1% ≤10%	>1% ≤10%	Cd							4.5	≤5 mg/kg											3.8	0.113987	3	4.65	0.0602973	3
Muhammad et al., 2021	INCUBATION	≤3 months	Straw	Level 3	strongly alcaline	low	Coarse	neutral	alcaline		Level 1	high	high	>1% ≤10%	>1% ≤10%	Cd							4.3	≤5 mg/kg											3.55	0.120619	3	4.65	0.0602973	3
Muhammad et al., 2021	INCUBATION	≤3 months	Straw	Level 3	strongly alcaline	low	Coarse	neutral	alcaline		Level 1	high	high	>1% ≤10%	>1% ≤10%	Cd							4.25	≤5 mg/kg											3.5	0.140773	3	4.65	0.0602973	3
Muhammad et al., 2021	INCUBATION	≤3 months	Straw	Level 3	strongly alcaline	low	Coarse	neutral	alcaline		Level 1	high	high	>1% ≤10%	>1% ≤10%	Cd							4.2	≤5 mg/kg											3.4	0.134	3	4.65	0.0602973	3
Nissen et al., 2021	POT	≤3 months	Straw	>700	strongly alcaline		Coarse	acid	alcaline		10			>1% ≤10%
Nissen et al., 2021	POT	≤3 months	Straw	>700	alcaline		Coarse	acid	alcaline		10			>1% ≤10%
Nissen et al., 2021	POT	≤3 months	Wood	>700	strongly alcaline		Coarse	acid	neutral		10			>1% ≤10%
Nissen et al., 2021	POT	≤3 months	Wood	501-700	strongly alcaline		Coarse	acid	neutral		10			>1% ≤10%
Nissen et al., 2021	POT	≤3 months	Wood	300-500	strongly alcaline		Coarse	acid	acid		10			>1% ≤10%
Lebrun et al., 2021	POT	≤3 months	Wood	300-500	alcaline	low	Coarse	strongly acid	alcaline		5			>1% ≤10%	>1% ≤10%				1060	>500 mg/kg					23390	>500 mg/kg
Lebrun et al., 2021	POT	≤3 months	Wood	300-500	alcaline	low	Coarse	strongly acid	alcaline		5			>1% ≤10%	>1% ≤10%				1060	>500 mg/kg					23390	>500 mg/kg
Zhang et al., 2021	FIELD	> 3 months ≤1 year	Straw	Level 2	alcaline			strongly acid	strongly acid					>1% ≤10%	>1% ≤10%	Mg, Cd concentration, Pb, Cu, Fe, Ni, Zn, Cr, K	427.6	>50 mg/kg ≤500 mg/kg																	0.62	0.09	3	0.74	0.03	3	143.92	5.25	3	141.24	17.1	3	19.93	3.41	3
Zhang et al., 2021	FIELD	> 3 months ≤1 year	Straw	Level 2	alcaline			strongly acid	strongly acid					>1% ≤10%	>1% ≤10%	Mg, Cd concentration, Pb, Cu, Fe, Ni, Zn, Cr, K	427.6	>50 mg/kg ≤500 mg/kg																	0.65	0.03	3	0.74	0.03	3	176.33	11.38	3	141.24	17.1	3	21.06	4.77	3
Zhang et al., 2021	FIELD	> 3 months ≤1 year	Straw	Level 2	alcaline			strongly acid	strongly acid					>1% ≤10%	>1% ≤10%	Mg, Cd concentration, Pb, Cu, Fe, Ni, Zn, Cr, K	427.6	>50 mg/kg ≤500 mg/kg																	0.61	0.03	3	0.74	0.03	3	162.91	4.73	3	141.24	17.1	3	21.91	0.48	3
Li et al., 2020	POT	≤3 months	Residues	Level 2	strongly alcaline	medium			acid		Level 1		low	>10%		As, Cd, Cu, Zn			55.07	>50 mg/kg ≤500 mg/kg			0.46	≤5 mg/kg			50.15	>10 mg/kg ≤100 mg/kg			100.55	>50 mg/kg ≤500 mg/kg			0.01848	0.0098	3	0.05627	0.0024	3							0.04388	0.026	3
Li et al., 2020	POT	≤3 months	Residues	Level 2	strongly alcaline	medium			neutral		Level 1		low	>10%		Cd Concentration, Cu, As, Zn			55.07	>50 mg/kg ≤500 mg/kg			0.46	≤5 mg/kg			50.15	>10 mg/kg ≤100 mg/kg			100.55	>50 mg/kg ≤500 mg/kg			0.00753	0.0015	3	0.05627	0.0024	3							0.13638	0.031	3
Terekhova et al., 2021	POT	≤3 months	Wood		alcaline		Fine	neutral	neutral		5			>1% ≤10%											23.7	≤50 mg/kg	22	>10 mg/kg ≤100 mg/kg			89.1	>50 mg/kg ≤500 mg/kg
Terekhova et al., 2021	POT	≤3 months	Wood		alcaline		Fine	neutral	neutral		5			>1% ≤10%											23.7	≤50 mg/kg	22	>10 mg/kg ≤100 mg/kg			89.1	>50 mg/kg ≤500 mg/kg
Terekhova et al., 2021	POT	≤3 months	Wood		alcaline		Fine	neutral	neutral		5			>1% ≤10%											650	>500 mg/kg	660	>100 mg/kg			1100	>500 mg/kg
Terekhova et al., 2021	POT	≤3 months	Wood		alcaline		Fine	neutral	neutral		5			>1% ≤10%											650	>500 mg/kg	660	>100 mg/kg			1100	>500 mg/kg
Terekhova et al., 2021	POT	≤3 months	Wood		alcaline		Fine	acid	acid		5			>1% ≤10%											10.1	≤50 mg/kg	9.3	≤10 mg/kg			32	≤50 mg/kg
Terekhova et al., 2021	POT	≤3 months	Wood		alcaline		Fine	acid	acid		5			>1% ≤10%											10.1	≤50 mg/kg	9.3	≤10 mg/kg			32	≤50 mg/kg
Terekhova et al., 2021	POT	≤3 months	Wood		alcaline		Fine	acid	acid		5			>1% ≤10%											650	>500 mg/kg	660	>100 mg/kg			1100	>500 mg/kg
Terekhova et al., 2021	POT	≤3 months	Wood		alcaline		Fine	acid	acid		5			>1% ≤10%											650	>500 mg/kg	660	>100 mg/kg			1100	>500 mg/kg
Morugan-Coronado et al., 2020	POT	>1 year ≤2 years	Manure	Level 2	strongly alcaline		Fine	alcaline	alcaline		Level 1		medium	>1% ≤10%	>1% ≤10%	Cd concentration, As, Zn			0.05	≤50 mg/kg			0.4	≤5 mg/kg	125	>50 mg/kg ≤500 mg/kg					225	>50 mg/kg ≤500 mg/kg			0.00552	0.00100459	3	0.0153	0.00455529	3
Morugan-Coronado et al., 2020	POT	>1 year ≤2 years	Manure	Level 2	strongly alcaline		Fine	alcaline	alcaline		Level 1		medium	>1% ≤10%	>1% ≤10%	Cd concentration, As, Zn			0.05	≤50 mg/kg			0.4	≤5 mg/kg	125	>50 mg/kg ≤500 mg/kg					225	>50 mg/kg ≤500 mg/kg			0.00666	0.00124708	3	0.0153	0.00455529	3
Morugan-Coronado et al., 2020	POT	>1 year ≤2 years	Manure	Level 2	strongly alcaline		Fine	alcaline	alcaline		Level 1		medium	>1% ≤10%	>1% ≤10%	Cd concentration, As, Zn			0.05	≤50 mg/kg			0.4	≤5 mg/kg	125	>50 mg/kg ≤500 mg/kg					225	>50 mg/kg ≤500 mg/kg			0.0072	0.00155885	3	0.0153	0.00455529	3
Morugan-Coronado et al., 2020	POT	>1 year ≤2 years	Manure	Level 2	strongly alcaline		Fine	alcaline	alcaline		Level 1		medium	>1% ≤10%	>1% ≤10%	Cd concentration, As, Zn			0.05	≤50 mg/kg			0.4	≤5 mg/kg	125	>50 mg/kg ≤500 mg/kg					225	>50 mg/kg ≤500 mg/kg			0.00389	0.00249415	3	0.0153	0.00455529	3
Morugan-Coronado et al., 2020	POT	>1 year ≤2 years	Manure	Level 2	strongly alcaline		Fine	alcaline	alcaline		Level 1		medium	>1% ≤10%	>1% ≤10%	Cd concentration, As, Zn			0.05	≤50 mg/kg			0.4	≤5 mg/kg	125	>50 mg/kg ≤500 mg/kg					225	>50 mg/kg ≤500 mg/kg			0.0065	0.00273664	3	0.0153	0.00455529	3
Morugan-Coronado et al., 2020	POT	>1 year ≤2 years	Manure	Level 2	strongly alcaline		Fine	alcaline	alcaline		Level 1		medium	>1% ≤10%	>1% ≤10%	Cd concentration, As, Zn			0.05	≤50 mg/kg			0.4	≤5 mg/kg	125	>50 mg/kg ≤500 mg/kg					225	>50 mg/kg ≤500 mg/kg			0.00941	0.00181865	3	0.0153	0.00455529	3
Simiele et al., 2020	POT	≤3 months	Wood	Level 2	alcaline	low	Coarse	acid	neutral		Level 1		medium		>1% ≤10%	Pb, As	1.1	≤50 mg/kg	539.06	>500 mg/kg	15.8	≤50 mg/kg			11453.6	>500 mg/kg															9118	986	4	9719	1108	4
Simiele et al., 2020	POT	≤3 months	Wood	Level 2	alcaline	low	Coarse	acid	neutral		Level 1		medium		>1% ≤10%	Pb, As	1.1	≤50 mg/kg	539.06	>500 mg/kg	15.8	≤50 mg/kg			11453.6	>500 mg/kg															9744	2056	4	9719	1108	4
Bouhia et al., 2021	POT	≤3 months	Wood		alcaline		Fine	alcaline	alcaline		Level 1		low	>1% ≤10%	>1% ≤10%	Zn
Mierzwa‑Hersztek et al., 2020	POT	> 3 months ≤1 year	Straw	Level 2	acid	low	Coarse	acid	acid		Level 1	low	medium	≤1%	≤1%	Cd, Pb, Cu, Zn							0.02	≤5 mg/kg	0.21	≤50 mg/kg	0.043	≤10 mg/kg			0.313	≤50 mg/kg			0.02	0.001	3	0.017	0.00085	3	0.487	0.02435	3	0.213	0.01065	3	0.033	0.00165	3
Mierzwa‑Hersztek et al., 2019	POT	> 3 months ≤1 year	Straw	Level 2	acid	low	Coarse	acid	acid		Level 1	low	medium	≤1%	≤1%	Cd, Pb, Cu, Zn							0.02	≤5 mg/kg	0.21	≤50 mg/kg	0.043	≤10 mg/kg			0.313	≤50 mg/kg			0.02	0.001	3	0.017	0.00085	3	0.483	0.02415	3	0.213	0.01065	3	0.043	0.00215	3
Mierzwa‑Hersztek et al., 2019	POT	> 3 months ≤1 year	Straw	Level 2	acid	low	Coarse	acid	acid		Level 1	low	medium	≤1%	>1% ≤10%	Cd, Pb, Cu, Zn							0.02	≤5 mg/kg	0.21	≤50 mg/kg	0.043	≤10 mg/kg			0.313	≤50 mg/kg			0.02	0.001	3	0.017	0.00085	3	0.547	0.02735	3	0.213	0.01065	3	0.05	0.0025	3
Mierzwa‑Hersztek et al., 2019	POT	> 3 months ≤1 year	Straw	Level 2	acid	low	Coarse	acid	acid		Level 1	low	medium	≤1%	>1% ≤10%	Cd, Pb, Cu, Zn							0.02	≤5 mg/kg	0.21	≤50 mg/kg	0.043	≤10 mg/kg			0.313	≤50 mg/kg			0.013	0.00065	3	0.017	0.00085	3	0.577	0.02885	3	0.213	0.01065	3	0.05	0.0025	3
Mierzwa‑Hersztek et al., 2019	POT	> 3 months ≤1 year	Straw	Level 2	acid	low	Coarse	acid	acid		Level 1	low	medium	≤1%	≤1%	Cd, Pb, Zn, Cu							0.19	≤5 mg/kg	37.9	≤50 mg/kg	1.85	≤10 mg/kg			16.5	≤50 mg/kg			0.027	0.00135	3	0.017	0.00085	3	0.197	0.00985	3	0.213	0.01065	3
Mierzwa‑Hersztek et al., 2019	POT	> 3 months ≤1 year	Straw	Level 2	acid	low	Coarse	acid	acid		Level 1	low	medium	≤1%	≤1%	Cd, Pb, Zn							0.19	≤5 mg/kg	37.9	≤50 mg/kg	1.85	≤10 mg/kg			16.5	≤50 mg/kg			0.02	0.001	3	0.017	0.00085	3	0.2	0.01	3	0.213	0.01065	3
Mierzwa‑Hersztek et al., 2019	POT	> 3 months ≤1 year	Straw	Level 2	acid	low	Coarse	acid	acid		Level 1	low	medium	≤1%	>1% ≤10%	Cd, Pb, Zn							0.19	≤5 mg/kg	37.9	≤50 mg/kg	1.85	≤10 mg/kg			16.5	≤50 mg/kg			0.02	0.001	3	0.017	0.00085	3	0.293	0.01465	3	0.213	0.01065	3
Mierzwa‑Hersztek et al., 2019	POT	> 3 months ≤1 year	Straw	Level 2	acid	low	Coarse	acid	acid		Level 1	low	medium	≤1%	>1% ≤10%	Cd, Pb, Zn, Cu							0.19	≤5 mg/kg	37.9	≤50 mg/kg	1.85	≤10 mg/kg			16.5	≤50 mg/kg			0.01	0.0005	3	0.017	0.00085	3	0.323	0.01615	3	0.213	0.01065	3	0.013	0.00065	3
Zhang et al., 2020	POT	≤3 months	Residues	300-500	alcaline	medium		alcaline	neutral		0.5			>1% ≤10%			8.6	≤50 mg/kg	138	>50 mg/kg ≤500 mg/kg
Zhang et al., 2020	POT	≤3 months	Residues	300-500	alcaline	medium		alcaline	neutral		1			>1% ≤10%			8.6	≤50 mg/kg	138	>50 mg/kg ≤500 mg/kg
Zhang et al., 2020	POT	≤3 months	Residues	300-500	alcaline	medium		alcaline	neutral		2			>1% ≤10%			8.6	≤50 mg/kg	138	>50 mg/kg ≤500 mg/kg
Zhang et al., 2020	POT	≤3 months	Residues	300-500	strongly alcaline	low		alcaline	acid		0.5			>1% ≤10%			8.6	≤50 mg/kg	138	>50 mg/kg ≤500 mg/kg
Zhang et al., 2020	POT	≤3 months	Residues	300-500	strongly alcaline	low		alcaline	acid		1			>1% ≤10%			8.6	≤50 mg/kg	138	>50 mg/kg ≤500 mg/kg
Zhang et al., 2020	POT	≤3 months	Residues	300-500	strongly alcaline	low		alcaline	neutral		2			>1% ≤10%			8.6	≤50 mg/kg	138	>50 mg/kg ≤500 mg/kg
Zhang et al., 2020	POT	≤3 months	Residues	300-500	strongly alcaline	low		alcaline	neutral		0.5			>1% ≤10%			8.6	≤50 mg/kg	138	>50 mg/kg ≤500 mg/kg
Zhang et al., 2020	POT	≤3 months	Residues	300-500	strongly alcaline	low		alcaline	acid		1			>1% ≤10%			8.6	≤50 mg/kg	138	>50 mg/kg ≤500 mg/kg
Zhang et al., 2020	POT	≤3 months	Residues	300-500	strongly alcaline	low		alcaline	neutral		2			>1% ≤10%			8.6	≤50 mg/kg	138	>50 mg/kg ≤500 mg/kg
Zhang et al., 2020	POT	≤3 months	Residues	300-500	strongly alcaline	low		alcaline	neutral		0.5			>1% ≤10%			8.6	≤50 mg/kg	138	>50 mg/kg ≤500 mg/kg
Zhang et al., 2020	POT	≤3 months	Residues	300-500	strongly alcaline	low		alcaline	acid		1			>1% ≤10%			8.6	≤50 mg/kg	138	>50 mg/kg ≤500 mg/kg
Zhang et al., 2020	POT	≤3 months	Residues	300-500	strongly alcaline	low		alcaline	neutral		2			>1% ≤10%			8.6	≤50 mg/kg	138	>50 mg/kg ≤500 mg/kg
Zhang et al., 2020	POT	≤3 months	Residues	300-500	alcaline	medium		neutral	neutral		0.5			>1% ≤10%			8.47	≤50 mg/kg	92	>50 mg/kg ≤500 mg/kg
Zhang et al., 2020	POT	≤3 months	Residues	300-500	alcaline	medium		neutral	neutral		1			>1% ≤10%			8.47	≤50 mg/kg	92	>50 mg/kg ≤500 mg/kg
Zhang et al., 2020	POT	≤3 months	Residues	300-500	alcaline	medium		neutral	neutral		2			>1% ≤10%			8.47	≤50 mg/kg	92	>50 mg/kg ≤500 mg/kg
Zhang et al., 2020	POT	≤3 months	Residues	300-500	strongly alcaline	low		neutral	neutral		0.5			>1% ≤10%			8.47	≤50 mg/kg	92	>50 mg/kg ≤500 mg/kg
Zhang et al., 2020	POT	≤3 months	Residues	300-500	strongly alcaline	low		neutral	neutral		1			>1% ≤10%			8.47	≤50 mg/kg	92	>50 mg/kg ≤500 mg/kg
Zhang et al., 2020	POT	≤3 months	Residues	300-500	strongly alcaline	low		neutral	neutral		2			>1% ≤10%			8.47	≤50 mg/kg	92	>50 mg/kg ≤500 mg/kg
Zhang et al., 2020	POT	≤3 months	Residues	300-500	strongly alcaline	low		neutral	neutral		0.5			>1% ≤10%			8.47	≤50 mg/kg	92	>50 mg/kg ≤500 mg/kg
Zhang et al., 2020	POT	≤3 months	Residues	300-500	strongly alcaline	low		neutral	neutral		1			>1% ≤10%			8.47	≤50 mg/kg	92	>50 mg/kg ≤500 mg/kg
Zhang et al., 2020	POT	≤3 months	Residues	300-500	strongly alcaline	low		neutral	acid		2			>1% ≤10%			8.47	≤50 mg/kg	92	>50 mg/kg ≤500 mg/kg
Zhang et al., 2020	POT	≤3 months	Residues	300-500	strongly alcaline	low		neutral	neutral		0.5			>1% ≤10%			8.47	≤50 mg/kg	92	>50 mg/kg ≤500 mg/kg
Zhang et al., 2020	POT	≤3 months	Residues	300-500	strongly alcaline	low		neutral	neutral		1			>1% ≤10%			8.47	≤50 mg/kg	92	>50 mg/kg ≤500 mg/kg
Zhang et al., 2020	POT	≤3 months	Residues	300-500	strongly alcaline	low		neutral	neutral		2			>1% ≤10%			8.47	≤50 mg/kg	92	>50 mg/kg ≤500 mg/kg
Zhang et al., 2020	POT	≤3 months	Residues	300-500	alcaline	medium		acid	neutral		0.5			>1% ≤10%			5.03	≤50 mg/kg	33	≤50 mg/kg
Zhang et al., 2020	POT	≤3 months	Residues	300-500	alcaline	medium		acid	neutral		1			>1% ≤10%			5.03	≤50 mg/kg	33	≤50 mg/kg
Zhang et al., 2020	POT	≤3 months	Residues	300-500	alcaline	medium		acid	neutral		2			>1% ≤10%			5.03	≤50 mg/kg	33	≤50 mg/kg
Zhang et al., 2020	POT	≤3 months	Residues	300-500	strongly alcaline	low		acid	neutral		0.5			>1% ≤10%			5.03	≤50 mg/kg	33	≤50 mg/kg
Zhang et al., 2020	POT	≤3 months	Residues	300-500	strongly alcaline	low		acid	neutral		1			>1% ≤10%			5.03	≤50 mg/kg	33	≤50 mg/kg
Zhang et al., 2020	POT	≤3 months	Residues	300-500	strongly alcaline	low		acid	neutral		2			>1% ≤10%			5.03	≤50 mg/kg	33	≤50 mg/kg
Zhang et al., 2020	POT	≤3 months	Residues	300-500	strongly alcaline	low		acid	neutral		0.5			>1% ≤10%			5.03	≤50 mg/kg	33	≤50 mg/kg
Zhang et al., 2020	POT	≤3 months	Residues	300-500	strongly alcaline	low		acid	neutral		1			>1% ≤10%			5.03	≤50 mg/kg	33	≤50 mg/kg
Zhang et al., 2020	POT	≤3 months	Residues	300-500	strongly alcaline	low		acid	neutral		2			>1% ≤10%			5.03	≤50 mg/kg	33	≤50 mg/kg
Zhang et al., 2020	POT	≤3 months	Residues	300-500	strongly alcaline	low		acid	neutral		0.5			>1% ≤10%			5.03	≤50 mg/kg	33	≤50 mg/kg
Zhang et al., 2020	POT	≤3 months	Residues	300-500	strongly alcaline	low		acid	neutral		1			>1% ≤10%			5.03	≤50 mg/kg	33	≤50 mg/kg
Zhang et al., 2020	POT	≤3 months	Residues	300-500	strongly alcaline	low		acid	alcaline		2			>1% ≤10%			5.03	≤50 mg/kg	33	≤50 mg/kg
Liu et al., 2020	POT	≤3 months	Residues	Level 2				acid			Level 1					As, Cd			1.26	≤50 mg/kg			1.55	≤5 mg/kg											0.42	0.1	3	0.67	0.1	3
Liu et al., 2020	POT	≤3 months	Residues	Level 2				acid			Level 1					As, Cd			1.26	≤50 mg/kg			1.55	≤5 mg/kg											0.32	0.1	3	0.67	0.1	3
Alvarez et al., 2020	INCUBATION	> 3 months ≤1 year	Manure	Level 2	strongly alcaline	low	Fine	acid	alcaline		Level 2	low	low	>1% ≤10%		Cd concentration, Pb, Cu, Fe, Ni, Zn, Cr	1307	>500 mg/kg	65.5	>50 mg/kg ≤500 mg/kg	120	>50 mg/kg ≤500 mg/kg	0.5	≤5 mg/kg	104	>50 mg/kg ≤500 mg/kg	183	>100 mg/kg	27.5	>5 mg/kg ≤50 mg/kg	130	>50 mg/kg ≤500 mg/kg	97.3	>10 mg/kg ≤100 mg/kg	0.07	0.0035	3	0.07	0.0035	3	2.78	0.139	3	6.89	0.3445	3	0.5	0.025	3
Alvarez et al., 2020	INCUBATION	> 3 months ≤1 year	Manure	Level 3	strongly alcaline	low	Fine	acid	alcaline		Level 2	low	low	>1% ≤10%		Cd concentration, Pb, Cu, Fe, Ni, Zn, Cr	1307	>500 mg/kg	65.5	>50 mg/kg ≤500 mg/kg	120	>50 mg/kg ≤500 mg/kg	0.5	≤5 mg/kg	104	>50 mg/kg ≤500 mg/kg	183	>100 mg/kg	27.5	>5 mg/kg ≤50 mg/kg	130	>50 mg/kg ≤500 mg/kg	97.3	>10 mg/kg ≤100 mg/kg	0.06	0.003	3	0.07	0.0035	3	2.28	0.114	3	6.89	0.3445	3	0.65	0.0325	3
Alvarez et al., 2020	INCUBATION	> 3 months ≤1 year	Manure	Level 2	strongly alcaline	low	Fine	acid	alcaline		Level 2	low	low	>1% ≤10%		Cd concentration, Pb, Cu, Fe, Ni, Zn, Cr	1307	>500 mg/kg	65.5	>50 mg/kg ≤500 mg/kg	120	>50 mg/kg ≤500 mg/kg	0.5	≤5 mg/kg	104	>50 mg/kg ≤500 mg/kg	183	>100 mg/kg	27.5	>5 mg/kg ≤50 mg/kg	130	>50 mg/kg ≤500 mg/kg	97.3	>10 mg/kg ≤100 mg/kg	0.06	0.003	3	0.06	0.003	3	3.62	0.181	3	6.89	0.3445	3	0.61	0.0305	3
Alvarez et al., 2020	INCUBATION	> 3 months ≤1 year	Manure	Level 3	strongly alcaline	low	Fine	acid	alcaline		Level 2	low	low	>1% ≤10%		Cd concentration, Pb, Cu, Fe, Ni, Zn, Cr	1307	>500 mg/kg	65.5	>50 mg/kg ≤500 mg/kg	120	>50 mg/kg ≤500 mg/kg	0.5	≤5 mg/kg	104	>50 mg/kg ≤500 mg/kg	183	>100 mg/kg	27.5	>5 mg/kg ≤50 mg/kg	130	>50 mg/kg ≤500 mg/kg	97.3	>10 mg/kg ≤100 mg/kg	0.07	0.0035	3	0.07	0.0035	3	4.17	0.2085	3	6.89	0.3445	3	0.15	0.0075	3
Alvarez et al., 2020	INCUBATION	> 3 months ≤1 year	Manure	Level 2	strongly alcaline	low	Coarse	strongly acid	strongly alcaline		Level 2	low	low	≤1%		Cd concentration, Pb, Cu, Fe, Ni, Zn, Cr	1949	>500 mg/kg	236	>50 mg/kg ≤500 mg/kg	100	>50 mg/kg ≤500 mg/kg	0.5	≤5 mg/kg	296	>50 mg/kg ≤500 mg/kg	374	>100 mg/kg	2.47	≤5 mg/kg	219	>50 mg/kg ≤500 mg/kg	2.56	≤10 mg/kg	0.06	0.003	3	0.07	0.0035	3	5.93	0.2965	3	6.35	0.3175	3	0.21	0.0105	3
Alvarez et al., 2020	INCUBATION	> 3 months ≤1 year	Manure	Level 3	strongly alcaline	low	Coarse	strongly acid	strongly alcaline		Level 2	low	low	≤1%		Cd concentration, Pb, Cu, Fe, Ni, Zn, Cr	1949	>500 mg/kg	236	>50 mg/kg ≤500 mg/kg	100	>50 mg/kg ≤500 mg/kg	0.5	≤5 mg/kg	296	>50 mg/kg ≤500 mg/kg	374	>100 mg/kg	2.47	≤5 mg/kg	219	>50 mg/kg ≤500 mg/kg	2.56	≤10 mg/kg	0.06	0.003	3	0.07	0.0035	3	5.38	0.269	3	6.35	0.3175	3	0.18	0.009	3
Alvarez et al., 2020	INCUBATION	> 3 months ≤1 year	Manure	Level 2	strongly alcaline	low	Coarse	strongly acid	alcaline		Level 2	low	low	≤1%		Cd concentration, Pb, Cu, Fe, Ni, Zn, Cr	1949	>500 mg/kg	236	>50 mg/kg ≤500 mg/kg	100	>50 mg/kg ≤500 mg/kg	0.5	≤5 mg/kg	296	>50 mg/kg ≤500 mg/kg	374	>100 mg/kg	2.47	≤5 mg/kg	219	>50 mg/kg ≤500 mg/kg	2.56	≤10 mg/kg	0.05	0.0025	3	0.07	0.0035	3	3.75	0.1875	3	6.35	0.3175	3	0.24	0.012	3
Alvarez et al., 2020	INCUBATION	> 3 months ≤1 year	Manure	Level 3	strongly alcaline	low	Coarse	strongly acid	alcaline		Level 2	low	low	≤1%		Cd concentration, Pb, Cu, Fe, Ni, Zn, Cr	1949	>500 mg/kg	236	>50 mg/kg ≤500 mg/kg	100	>50 mg/kg ≤500 mg/kg	0.5	≤5 mg/kg	296	>50 mg/kg ≤500 mg/kg	374	>100 mg/kg	2.47	≤5 mg/kg	219	>50 mg/kg ≤500 mg/kg	2.56	≤10 mg/kg	0.05	0.0025	3	0.07	0.0035	3	4.08	0.204	3	6.35	0.3175	3	0.21	0.0105	3
Alvarez et al., 2020	INCUBATION	> 3 months ≤1 year	Manure	Level 2	strongly alcaline	low	Coarse	strongly acid	neutral		Level 2	low	low	≤1%		Cd concentration, Pb, Cu, Fe, Ni, Zn, Cr	988	>500 mg/kg	528	>500 mg/kg	90	>50 mg/kg ≤500 mg/kg	0.5	≤5 mg/kg	422	>50 mg/kg ≤500 mg/kg	248	>100 mg/kg	2.13	≤5 mg/kg	81.4	>50 mg/kg ≤500 mg/kg	2.42	≤10 mg/kg	0.05	0.0025	3	0.07	0.0035	3	3.57	0.1785	3	5.25	0.2625	3	0.15	0.0075	3
Alvarez et al., 2020	INCUBATION	> 3 months ≤1 year	Manure	Level 3	strongly alcaline	low	Coarse	strongly acid	alcaline		Level 2	low	low	≤1%		Cd concentration, Pb, Cu, Fe, Ni, Zn, Cr	988	>500 mg/kg	528	>500 mg/kg	90	>50 mg/kg ≤500 mg/kg	0.5	≤5 mg/kg	422	>50 mg/kg ≤500 mg/kg	248	>100 mg/kg	2.13	≤5 mg/kg	81.4	>50 mg/kg ≤500 mg/kg	2.42	≤10 mg/kg	0.05	0.0025	3	0.07	0.0035	3	4.8	0.24	3	5.25	0.2625	3	0.18	0.009	3
Alvarez et al., 2020	INCUBATION	> 3 months ≤1 year	Manure	Level 2	strongly alcaline	low	Coarse	strongly acid	alcaline		Level 2	low	low	≤1%		Cd concentration, Pb, Cu, Fe, Ni, Zn, Cr	988	>500 mg/kg	528	>500 mg/kg	90	>50 mg/kg ≤500 mg/kg	0.5	≤5 mg/kg	422	>50 mg/kg ≤500 mg/kg	248	>100 mg/kg	2.13	≤5 mg/kg	81.4	>50 mg/kg ≤500 mg/kg	2.42	≤10 mg/kg	0.06	0.003	3	0.07	0.0035	3	4.11	0.2055	3	5.25	0.2625	3	0.11	0.0055	3
Alvarez et al., 2020	INCUBATION	> 3 months ≤1 year	Manure	Level 3	strongly alcaline	low	Coarse	strongly acid	alcaline		Level 2	low	low	≤1%		Cd concentration, Pb, Cu, Fe, Ni, Zn, Cr	988	>500 mg/kg	528	>500 mg/kg	90	>50 mg/kg ≤500 mg/kg	0.5	≤5 mg/kg	422	>50 mg/kg ≤500 mg/kg	248	>100 mg/kg	2.13	≤5 mg/kg	81.4	>50 mg/kg ≤500 mg/kg	2.42	≤10 mg/kg	0.06	0.003	3	0.07	0.0035	3	4.32	0.216	3	5.25	0.2625	3	0.15	0.0075	3
Alvarez et al., 2020	INCUBATION	> 3 months ≤1 year	Manure	Level 2	strongly alcaline	low	Coarse	acid	alcaline		Level 2	low	low	>1% ≤10%		Cd concentration, Pb, Cu, Fe, Ni, Zn, Cr	1915	>500 mg/kg	110	>50 mg/kg ≤500 mg/kg	4340	>500 mg/kg	12.7	>5 mg/kg ≤50 mg/kg	3295	>500 mg/kg	13.6	>10 mg/kg ≤100 mg/kg	43.1	>5 mg/kg ≤50 mg/kg	11035	>500 mg/kg	72	>10 mg/kg ≤100 mg/kg	1.46	0.073	3	4.93	0.2465	3	6.85	0.3425	3	8.35	0.4175	3	0.04	0.002	3
Alvarez et al., 2020	INCUBATION	> 3 months ≤1 year	Manure	Level 3	strongly alcaline	low	Coarse	acid	neutral		Level 2	low	low	>1% ≤10%		Cd concentration, Pb, Cu, Fe, Ni, Zn, Cr	1915	>500 mg/kg	110	>50 mg/kg ≤500 mg/kg	4340	>500 mg/kg	12.7	>5 mg/kg ≤50 mg/kg	3295	>500 mg/kg	13.6	>10 mg/kg ≤100 mg/kg	43.1	>5 mg/kg ≤50 mg/kg	11035	>500 mg/kg	72	>10 mg/kg ≤100 mg/kg	1.1	0.055	3	4.93	0.2465	3	5.19	0.2595	3	8.35	0.4175	3	0.14	0.007	3
Alvarez et al., 2020	INCUBATION	> 3 months ≤1 year	Manure	Level 2	strongly alcaline	low	Coarse	acid	neutral		Level 2	low	low	>1% ≤10%		Cd concentration, Pb, Cu, Fe, Ni, Zn, Cr	1915	>500 mg/kg	110	>50 mg/kg ≤500 mg/kg	4340	>500 mg/kg	12.7	>5 mg/kg ≤50 mg/kg	3295	>500 mg/kg	13.6	>10 mg/kg ≤100 mg/kg	43.1	>5 mg/kg ≤50 mg/kg	11035	>500 mg/kg	72	>10 mg/kg ≤100 mg/kg	2.94	0.147	3	4.93	0.2465	3	16.57	0.8285	3	8.35	0.4175	3	0.16	0.008	3
Alvarez et al., 2020	INCUBATION	> 3 months ≤1 year	Manure	Level 3	strongly alcaline	low	Coarse	acid	neutral		Level 2	low	low	>1% ≤10%		Cd concentration, Pb, Cu, Fe, Ni, Zn, Cr	1915	>500 mg/kg	110	>50 mg/kg ≤500 mg/kg	4340	>500 mg/kg	12.7	>5 mg/kg ≤50 mg/kg	3295	>500 mg/kg	13.6	>10 mg/kg ≤100 mg/kg	43.1	>5 mg/kg ≤50 mg/kg	11035	>500 mg/kg	72	>10 mg/kg ≤100 mg/kg	2.5	0.125	3	4.93	0.2465	3	14.38	0.719	3	8.35	0.4175	3	0.15	0.0075	3
Alvarez et al., 2020	INCUBATION	> 3 months ≤1 year	Manure	Level 2	strongly alcaline	low	Coarse	neutral	alcaline		Level 2	low	low	>1% ≤10%		Cd concentration, Pb, Cu, Fe, Ni, Zn, Cr	961	>500 mg/kg	44.4	≤50 mg/kg	6930	>500 mg/kg	1.81	≤5 mg/kg	174	>50 mg/kg ≤500 mg/kg	9.12	≤10 mg/kg	27.2	>5 mg/kg ≤50 mg/kg	180	>50 mg/kg ≤500 mg/kg	44.4	>10 mg/kg ≤100 mg/kg	0.26	0.013	3	0.33	0.0165	3	5.95	0.2975	3	7.1	0.355	3	0.37	0.0185	3
Alvarez et al., 2020	INCUBATION	> 3 months ≤1 year	Manure	Level 3	strongly alcaline	low	Coarse	neutral	alcaline		Level 2	low	low	>1% ≤10%		Cd concentration, Pb, Cu, Fe, Ni, Zn, Cr	961	>500 mg/kg	44.4	≤50 mg/kg	6930	>500 mg/kg	1.81	≤5 mg/kg	174	>50 mg/kg ≤500 mg/kg	9.12	≤10 mg/kg	27.2	>5 mg/kg ≤50 mg/kg	180	>50 mg/kg ≤500 mg/kg	44.4	>10 mg/kg ≤100 mg/kg	0.13	0.0065	3	0.33	0.0165	3	7.63	0.3815	3	7.1	0.355	3	0.09	0.0045	3
Alvarez et al., 2020	INCUBATION	> 3 months ≤1 year	Manure	Level 2	strongly alcaline	low	Coarse	neutral	alcaline		Level 2	low	low	>1% ≤10%		Cd concentration, Pb, Cu, Fe, Ni, Zn, Cr	961	>500 mg/kg	44.4	≤50 mg/kg	6930	>500 mg/kg	1.81	≤5 mg/kg	174	>50 mg/kg ≤500 mg/kg	9.12	≤10 mg/kg	27.2	>5 mg/kg ≤50 mg/kg	180	>50 mg/kg ≤500 mg/kg	44.4	>10 mg/kg ≤100 mg/kg	0.21	0.0105	3	0.33	0.0165	3	4.86	0.243	3	7.1	0.355	3	0.05	0.0025	3
Alvarez et al., 2020	INCUBATION	> 3 months ≤1 year	Manure	Level 3	strongly alcaline	low	Coarse	neutral	alcaline		Level 2	low	low	>1% ≤10%		Cd concentration, Pb, Cu, Fe, Ni, Zn, Cr	961	>500 mg/kg	44.4	≤50 mg/kg	6930	>500 mg/kg	1.81	≤5 mg/kg	174	>50 mg/kg ≤500 mg/kg	9.12	≤10 mg/kg	27.2	>5 mg/kg ≤50 mg/kg	180	>50 mg/kg ≤500 mg/kg	44.4	>10 mg/kg ≤100 mg/kg	0.27	0.0135	3	0.33	0.0165	3	7.64	0.382	3	7.1	0.355	3	0.07	0.0035	3
Alvarez et al., 2020	INCUBATION	> 3 months ≤1 year	Manure	Level 2	strongly alcaline	low	Fine	acid	strongly alcaline		Level 2	low	low	>1% ≤10%		Cd concentration, Pb, Cu, Fe, Ni, Zn, Cr	706	>500 mg/kg	19.3	≤50 mg/kg	7210	>500 mg/kg	0.99	≤5 mg/kg	82.2	>50 mg/kg ≤500 mg/kg	11.2	>10 mg/kg ≤100 mg/kg	8.8	>5 mg/kg ≤50 mg/kg	758	>500 mg/kg	43.8	>10 mg/kg ≤100 mg/kg	0.37	0.0185	3	0.4	0.02	3	6.34	0.317	3	6.43	0.3215	3	0.16	0.008	3
Alvarez et al., 2020	INCUBATION	> 3 months ≤1 year	Manure	Level 3	strongly alcaline	low	Fine	acid	alcaline		Level 2	low	low	>1% ≤10%		Cd concentration, Pb, Cu, Fe, Ni, Zn, Cr	706	>500 mg/kg	19.3	≤50 mg/kg	7210	>500 mg/kg	0.99	≤5 mg/kg	82.2	>50 mg/kg ≤500 mg/kg	11.2	>10 mg/kg ≤100 mg/kg	8.8	>5 mg/kg ≤50 mg/kg	758	>500 mg/kg	43.8	>10 mg/kg ≤100 mg/kg	0.28	0.014	3	0.4	0.02	3	4	0.2	3	6.43	0.3215	3	0.38	0.019	3
Alvarez et al., 2020	INCUBATION	> 3 months ≤1 year	Manure	Level 2	strongly alcaline	low	Fine	acid	strongly alcaline		Level 2	low	low	>1% ≤10%		Cd concentration, Pb, Cu, Fe, Ni, Zn, Cr	706	>500 mg/kg	19.3	≤50 mg/kg	7210	>500 mg/kg	0.99	≤5 mg/kg	82.2	>50 mg/kg ≤500 mg/kg	11.2	>10 mg/kg ≤100 mg/kg	8.8	>5 mg/kg ≤50 mg/kg	758	>500 mg/kg	43.8	>10 mg/kg ≤100 mg/kg	0.23	0.0115	3	0.4	0.02	3	15.73	0.7865	3	6.43	0.3215	3	0.19	0.0095	3
Alvarez et al., 2020	INCUBATION	> 3 months ≤1 year	Manure	Level 3	strongly alcaline	low	Fine	acid	strongly alcaline		Level 2	low	low	>1% ≤10%		Cd concentration, Pb, Cu, Fe, Ni, Zn, Cr	706	>500 mg/kg	19.3	≤50 mg/kg	7210	>500 mg/kg	0.99	≤5 mg/kg	82.2	>50 mg/kg ≤500 mg/kg	11.2	>10 mg/kg ≤100 mg/kg	8.8	>5 mg/kg ≤50 mg/kg	758	>500 mg/kg	43.8	>10 mg/kg ≤100 mg/kg	0.34	0.017	3	0.4	0.02	3	15.33	0.7665	3	6.43	0.3215	3	0.26	0.013	3
Alvarez et al., 2020	INCUBATION	> 3 months ≤1 year	Manure	Level 2	strongly alcaline	low	Fine	alcaline	alcaline		Level 2	low	low	≤1%		Cd concentration, Pb, Cu, Fe, Ni, Zn, Cr	10001	>500 mg/kg	144	>50 mg/kg ≤500 mg/kg	5050	>500 mg/kg	5.84	>5 mg/kg ≤50 mg/kg	5072	>500 mg/kg	34.3	>10 mg/kg ≤100 mg/kg	44.8	>5 mg/kg ≤50 mg/kg	2575	>500 mg/kg	61.5	>10 mg/kg ≤100 mg/kg	0.009	0.00045	3	0.83	0.0415	3	12.09	0.6045	3	14.24	0.712	3	0.38	0.019	3
Alvarez et al., 2020	INCUBATION	> 3 months ≤1 year	Manure	Level 3	strongly alcaline	low	Fine	alcaline	alcaline		Level 2	low	low	≤1%		Cd concentration, Pb, Cu, Fe, Ni, Zn, Cr	10001	>500 mg/kg	144	>50 mg/kg ≤500 mg/kg	5050	>500 mg/kg	5.84	>5 mg/kg ≤50 mg/kg	5072	>500 mg/kg	34.3	>10 mg/kg ≤100 mg/kg	44.8	>5 mg/kg ≤50 mg/kg	2575	>500 mg/kg	61.5	>10 mg/kg ≤100 mg/kg	0.009	0.00045	3	0.83	0.0415	3	5.72	0.286	3	14.24	0.712	3	0.32	0.016	3
Alvarez et al., 2020	INCUBATION	> 3 months ≤1 year	Manure	Level 2	strongly alcaline	low	Fine	alcaline	alcaline		Level 2	low	low	≤1%		Cd concentration, Pb, Cu, Fe, Ni, Zn, Cr	10001	>500 mg/kg	144	>50 mg/kg ≤500 mg/kg	5050	>500 mg/kg	5.84	>5 mg/kg ≤50 mg/kg	5072	>500 mg/kg	34.3	>10 mg/kg ≤100 mg/kg	44.8	>5 mg/kg ≤50 mg/kg	2575	>500 mg/kg	61.5	>10 mg/kg ≤100 mg/kg	0.009	0.00045	3	0.83	0.0415	3	5.84	0.292	3	14.24	0.712	3	0.3	0.015	3
Alvarez et al., 2020	INCUBATION	> 3 months ≤1 year	Manure	Level 3	strongly alcaline	low	Fine	alcaline	alcaline		Level 2	low	low	≤1%		Cd concentration, Pb, Cu, Fe, Ni, Zn, Cr	10001	>500 mg/kg	144	>50 mg/kg ≤500 mg/kg	5050	>500 mg/kg	5.84	>5 mg/kg ≤50 mg/kg	5072	>500 mg/kg	34.3	>10 mg/kg ≤100 mg/kg	44.8	>5 mg/kg ≤50 mg/kg	2575	>500 mg/kg	61.5	>10 mg/kg ≤100 mg/kg	0.009	0.00045	3	0.83	0.0415	3	6.07	0.3035	3	14.24	0.712	3	0.42	0.021	3
Alvarez et al., 2020	INCUBATION	> 3 months ≤1 year	Manure	Level 2	strongly alcaline	low	Fine	alcaline	neutral		Level 2	low	low	≤1%		Cd concentration, Pb, Cu, Fe, Ni, Zn, Cr	6632	>500 mg/kg	118.3	>50 mg/kg ≤500 mg/kg	4970	>500 mg/kg	20.1	>5 mg/kg ≤50 mg/kg	2848	>500 mg/kg	207	>100 mg/kg	39.9	>5 mg/kg ≤50 mg/kg	8573	>500 mg/kg	39.2	>10 mg/kg ≤100 mg/kg	0.009	0.00045	3	2.84	0.142	3	4.76	0.238	3	6.49	0.3245	3	0.22	0.011	3
Alvarez et al., 2020	INCUBATION	> 3 months ≤1 year	Manure	Level 3	strongly alcaline	low	Fine	alcaline	alcaline		Level 2	low	low	≤1%		Cd concentration, Pb, Cu, Fe, Ni, Zn, Cr	6632	>500 mg/kg	118.3	>50 mg/kg ≤500 mg/kg	4970	>500 mg/kg	20.1	>5 mg/kg ≤50 mg/kg	2848	>500 mg/kg	207	>100 mg/kg	39.9	>5 mg/kg ≤50 mg/kg	8573	>500 mg/kg	39.2	>10 mg/kg ≤100 mg/kg	0.75	0.0375	3	2.84	0.142	3	5.66	0.283	3	6.49	0.3245	3	0.46	0.023	3
Alvarez et al., 2020	INCUBATION	> 3 months ≤1 year	Manure	Level 2	strongly alcaline	low	Fine	alcaline	alcaline		Level 2	low	low	≤1%		Cd concentration, Pb, Cu, Fe, Ni, Zn, Cr	6632	>500 mg/kg	118.3	>50 mg/kg ≤500 mg/kg	4970	>500 mg/kg	20.1	>5 mg/kg ≤50 mg/kg	2848	>500 mg/kg	207	>100 mg/kg	39.9	>5 mg/kg ≤50 mg/kg	8573	>500 mg/kg	39.2	>10 mg/kg ≤100 mg/kg	0.79	0.0395	3	2.84	0.142	3	5.22	0.261	3	6.49	0.3245	3	0.49	0.0245	3
Alvarez et al., 2020	INCUBATION	> 3 months ≤1 year	Manure	Level 3	strongly alcaline	low	Fine	alcaline	alcaline		Level 2	low	low	≤1%		Cd concentration, Pb, Cu, Fe, Ni, Zn, Cr	6632	>500 mg/kg	118.3	>50 mg/kg ≤500 mg/kg	4970	>500 mg/kg	20.1	>5 mg/kg ≤50 mg/kg	2848	>500 mg/kg	207	>100 mg/kg	39.9	>5 mg/kg ≤50 mg/kg	8573	>500 mg/kg	39.2	>10 mg/kg ≤100 mg/kg	1.5	0.075	3	2.84	0.142	3	5.67	0.2835	3	6.49	0.3245	3	0.46	0.023	3
Alvarez et al., 2020	INCUBATION	> 3 months ≤1 year	Manure	Level 2	strongly alcaline	low	Coarse	alcaline	alcaline		Level 2	low	low	≤1%		Cd concentration, Pb, Cu, Fe, Ni, Zn, Cr	424	>50 mg/kg ≤500 mg/kg	234	>50 mg/kg ≤500 mg/kg	6130	>500 mg/kg	8.62	>5 mg/kg ≤50 mg/kg	2321	>500 mg/kg	35.1	>10 mg/kg ≤100 mg/kg	29.5	>5 mg/kg ≤50 mg/kg	3580	>500 mg/kg	50.9	>10 mg/kg ≤100 mg/kg	1.53	0.0765	3	0.79	0.0395	3	8.23	0.4115	3	4.74	0.237	3	0.23	0.0115	3
Alvarez et al., 2020	INCUBATION	> 3 months ≤1 year	Manure	Level 3	strongly alcaline	low	Coarse	alcaline	alcaline		Level 2	low	low	≤1%		Cd concentration, Pb, Cu, Fe, Ni, Zn, Cr	424	>50 mg/kg ≤500 mg/kg	234	>50 mg/kg ≤500 mg/kg	6130	>500 mg/kg	8.62	>5 mg/kg ≤50 mg/kg	2321	>500 mg/kg	35.1	>10 mg/kg ≤100 mg/kg	29.5	>5 mg/kg ≤50 mg/kg	3580	>500 mg/kg	50.9	>10 mg/kg ≤100 mg/kg	1.54	0.077	3	0.79	0.0395	3	9.74	0.487	3	4.74	0.237	3	0.1	0.005	3
Alvarez et al., 2020	INCUBATION	> 3 months ≤1 year	Manure	Level 2	strongly alcaline	low	Coarse	alcaline	alcaline		Level 2	low	low	≤1%		Cd concentration, Pb, Cu, Fe, Ni, Zn, Cr	424	>50 mg/kg ≤500 mg/kg	234	>50 mg/kg ≤500 mg/kg	6130	>500 mg/kg	8.62	>5 mg/kg ≤50 mg/kg	2321	>500 mg/kg	35.1	>10 mg/kg ≤100 mg/kg	29.5	>5 mg/kg ≤50 mg/kg	3580	>500 mg/kg	50.9	>10 mg/kg ≤100 mg/kg	2.27	0.1135	3	0.79	0.0395	3	3.55	0.1775	3	4.74	0.237	3	0.27	0.0135	3
Alvarez et al., 2020	INCUBATION	> 3 months ≤1 year	Manure	Level 3	strongly alcaline	low	Coarse	alcaline	alcaline		Level 2	low	low	≤1%		Cd concentration, Pb, Cu, Fe, Ni, Zn, Cr	424	>50 mg/kg ≤500 mg/kg	234	>50 mg/kg ≤500 mg/kg	6130	>500 mg/kg	8.62	>5 mg/kg ≤50 mg/kg	2321	>500 mg/kg	35.1	>10 mg/kg ≤100 mg/kg	29.5	>5 mg/kg ≤50 mg/kg	3580	>500 mg/kg	50.9	>10 mg/kg ≤100 mg/kg	1.3	0.065	3	0.79	0.0395	3	1.29	0.0645	3	4.74	0.237	3	0.29	0.0145	3
Alvarez et al., 2020	INCUBATION	> 3 months ≤1 year	Manure	Level 2	strongly alcaline	low	Coarse	alcaline	alcaline		Level 2	low	low	≤1%		Cd concentration, Pb, Cu, Fe, Ni, Zn, Cr	722	>500 mg/kg	530	>500 mg/kg	8330	>500 mg/kg	16.4	>5 mg/kg ≤50 mg/kg	2770	>500 mg/kg	47	>10 mg/kg ≤100 mg/kg	31.4	>5 mg/kg ≤50 mg/kg	6373	>500 mg/kg	43.2	>10 mg/kg ≤100 mg/kg	1.18	0.059	3	0.47	0.0235	3	8.17	0.4085	3	3.62	0.181	3	0.2	0.01	3
Alvarez et al., 2020	INCUBATION	> 3 months ≤1 year	Manure	Level 3	strongly alcaline	low	Coarse	alcaline	alcaline		Level 2	low	low	≤1%		Cd concentration, Pb, Cu, Fe, Ni, Zn, Cr	722	>500 mg/kg	530	>500 mg/kg	8330	>500 mg/kg	16.4	>5 mg/kg ≤50 mg/kg	2770	>500 mg/kg	47	>10 mg/kg ≤100 mg/kg	31.4	>5 mg/kg ≤50 mg/kg	6373	>500 mg/kg	43.2	>10 mg/kg ≤100 mg/kg	0.42	0.021	3	0.47	0.0235	3	0.009	0.00045	3	3.62	0.181	3	0.18	0.009	3
Alvarez et al., 2020	INCUBATION	> 3 months ≤1 year	Manure	Level 2	strongly alcaline	low	Coarse	alcaline	alcaline		Level 2	low	low	≤1%		Cd concentration, Pb, Cu, Fe, Ni, Zn, Cr	722	>500 mg/kg	530	>500 mg/kg	8330	>500 mg/kg	16.4	>5 mg/kg ≤50 mg/kg	2770	>500 mg/kg	47	>10 mg/kg ≤100 mg/kg	31.4	>5 mg/kg ≤50 mg/kg	6373	>500 mg/kg	43.2	>10 mg/kg ≤100 mg/kg	1.45	0.0725	3	0.47	0.0235	3	2.5	0.125	3	3.62	0.181	3	0.38	0.019	3
Alvarez et al., 2020	INCUBATION	> 3 months ≤1 year	Manure	Level 3	strongly alcaline	low	Coarse	alcaline	alcaline		Level 2	low	low	≤1%		Cd concentration, Pb, Cu, Fe, Ni, Zn, Cr	722	>500 mg/kg	530	>500 mg/kg	8330	>500 mg/kg	16.4	>5 mg/kg ≤50 mg/kg	2770	>500 mg/kg	47	>10 mg/kg ≤100 mg/kg	31.4	>5 mg/kg ≤50 mg/kg	6373	>500 mg/kg	43.2	>10 mg/kg ≤100 mg/kg	0.81	0.0405	3	0.47	0.0235	3	0.009	0.00045	3	3.62	0.181	3	0.28	0.014	3
Tu et al., 2020	POT	≤3 months	Straw	Level 2	strongly alcaline		Coarse	alcaline	alcaline		Level 1			≤1%		P, K, Cd, Cu	1090	>500 mg/kg			15360	>500 mg/kg	29.5	>5 mg/kg ≤50 mg/kg			127.3	>100 mg/kg							24.7	0.41116	3	29.5	0.41116	3							108.2	1.69883	3
Tu et al., 2020	POT	≤3 months	Straw	Level 2	strongly alcaline		Coarse	alcaline	alcaline		Level 1			≤1%		P, K, Cd, Cu	1090	>500 mg/kg			15360	>500 mg/kg	29.5	>5 mg/kg ≤50 mg/kg			127.3	>100 mg/kg							20.8	2.98091	3	29.5	0.41116	3							73.4	13.4019	3
Tu et al., 2020	POT	≤3 months	Straw	Level 2	strongly alcaline		Coarse	alcaline	neutral		Level 1			≤1%		P, K, Cd, Cu	1090	>500 mg/kg			15360	>500 mg/kg	29.5	>5 mg/kg ≤50 mg/kg			127.3	>100 mg/kg							23.3	0.20558	3	29.5	0.41116	3							104.1	0.75504	3
Tu et al., 2020	POT	≤3 months	Straw	Level 2	strongly alcaline		Coarse	alcaline	neutral		Level 1			≤1%		P, K, Cd, Cu	1090	>500 mg/kg			15360	>500 mg/kg	29.5	>5 mg/kg ≤50 mg/kg			127.3	>100 mg/kg							16.8	1.49046	3	29.5	0.41116	3							62.4	7.3616	3
Qin et al., 2020	POT	≤3 months	Straw		alcaline	medium	Coarse	acid	acid		2	medium					9.3	≤50 mg/kg			182.7	>50 mg/kg ≤500 mg/kg	1.8	≤5 mg/kg
Qin et al., 2020	POT	≤3 months	Straw		alcaline	medium	Coarse	acid	acid		5	medium					9.3	≤50 mg/kg			182.7	>50 mg/kg ≤500 mg/kg	1.8	≤5 mg/kg
Qin et al., 2020	POT	> 3 months ≤1 year	Straw		alcaline	medium	Coarse	acid	acid		2	medium		>1% ≤10%			9.3	≤50 mg/kg			182.7	>50 mg/kg ≤500 mg/kg	1.8	≤5 mg/kg
Qin et al., 2020	POT	> 3 months ≤1 year	Straw		alcaline	medium	Coarse	acid	acid		5	medium		>1% ≤10%			9.3	≤50 mg/kg			182.7	>50 mg/kg ≤500 mg/kg	1.8	≤5 mg/kg
Liu et al., 2020	POT	≤3 months	Straw	Level 2	alcaline	high	Medium	alcaline			Level 1			≤1%		Cd/Cd concentration							9.64	>5 mg/kg ≤50 mg/kg											7	0.18682	3	6.6	0.134511	3
Liu et al., 2020	POT	≤3 months	Straw	Level 2	alcaline	high	Medium	alcaline			Level 1			≤1%		Cd/Cd concentration							9.64	>5 mg/kg ≤50 mg/kg											8	0.149457	3	6.6	0.134511	3
Liu et al., 2020	POT	≤3 months	Straw	Level 2	alcaline	high	Medium	alcaline			Level 1			≤1%		Cd/Cd concentration							9.64	>5 mg/kg ≤50 mg/kg											8.6	0.104619	3	6.6	0.134511	3
Meier et al., 2019c	POT	≤3 months	Manure	Level 2	strongly alcaline	low	Coarse	acid	neutral		Level 1			>1% ≤10%		Cu											338	>100 mg/kg																			149	43.4745	3
Meier et al., 2019c	POT	≤3 months	Residues	Level 2	alcaline	low	Coarse	acid	acid		Level 1			>1% ≤10%		Cu											338	>100 mg/kg																			150	31.1769	3
Meier et al., 2019c	POT	≤3 months	Wood	Level 3	strongly alcaline	low	Coarse	acid	acid		Level 1			>1% ≤10%		Cu											338	>100 mg/kg																			202	52.4811	3
Frick et al., 2018		≤3 months	Grass	Level 4	strongly alcaline		Medium	acid			Level 1			>1% ≤10%		Fe, Zn, Cr, K			1364	>500 mg/kg					29	≤50 mg/kg	1662	>100 mg/kg			120	>50 mg/kg ≤500 mg/kg	540	>100 mg/kg
Frick et al., 2018		≤3 months	Grass	Level 4	strongly alcaline		Medium	acid			Level 1			>1% ≤10%		Fe, Zn, Cr, K			1364	>500 mg/kg					29	≤50 mg/kg	1662	>100 mg/kg			120	>50 mg/kg ≤500 mg/kg	540	>100 mg/kg
Frick et al., 2018		≤3 months	Grass	Level 4	strongly alcaline		Medium	acid			Level 1			>1% ≤10%		Fe, Zn, Cr, K			1364	>500 mg/kg					29	≤50 mg/kg	1662	>100 mg/kg			120	>50 mg/kg ≤500 mg/kg	540	>100 mg/kg
Frick et al., 2018		≤3 months	Grass	Level 4	strongly alcaline		Medium	acid			Level 1			>1% ≤10%		Fe, Zn, Cr, K			1364	>500 mg/kg					29	≤50 mg/kg	1662	>100 mg/kg			120	>50 mg/kg ≤500 mg/kg	540	>100 mg/kg
Li et al., 2018	POT	≤3 months	Grass	501-700	neutral	high	Fine	neutral	neutral		1	medium	medium	>1% ≤10%			909	>500 mg/kg			16393	>500 mg/kg	0.08	≤5 mg/kg
Gao & DeLuca, 2018	FIELD		Wood	Level 2	neutral		Coarse	neutral	neutral	Level 2					>1% ≤10%	Ca2+, Fe
Gao & DeLuca, 2018	FIELD		Wood	Level 2	neutral		Coarse	neutral	neutral	Level 2					>1% ≤10%	Ca2+, Fe
Strachel et al., 2018	POT	≤3 months	Residues		alcaline		Fine	neutral	neutral		2.5			>1% ≤10%
Wawra et al., 2018	POT	>1 year ≤2 years	Grass	Level 2	alcaline		Medium	neutral	alcaline		Level 1		low	>1% ≤10%		As, Cd, Pb, Cu, Zn			0.0081	≤50 mg/kg			0.0017	≤5 mg/kg	0.0751	≤50 mg/kg	0.0615	≤10 mg/kg			0.9515	≤50 mg/kg			0.0016	0.0001	3	0.0026	0.0006	3	0.1082	0.0071	3	0.2172	0.0909	3	0.074	0.0144	3
Wawra et al., 2018	POT	>1 year ≤2 years	Grass	300-500	alcaline		Medium	neutral	alcaline		3		low	>1% ≤10%					0.009	≤50 mg/kg			0.0016	≤5 mg/kg	0.0632	≤50 mg/kg	0.0707	≤10 mg/kg			0.8221	≤50 mg/kg
Yang et al., 2018	POT	> 3 months ≤1 year	Straw		strongly alcaline		Fine	neutral	neutral		Level 1			>1% ≤10%		Fe	730	>500 mg/kg	0.74	≤50 mg/kg	14190	>500 mg/kg
Yang et al., 2018	POT	> 3 months ≤1 year	Straw		strongly alcaline		Fine	neutral	neutral		Level 1			>1% ≤10%		Fe	730	>500 mg/kg			14190	>500 mg/kg
Yang et al., 2018	POT	> 3 months ≤1 year	Straw		strongly alcaline		Fine	neutral	neutral		Level 1			>1% ≤10%		Fe	730	>500 mg/kg			14190	>500 mg/kg
Xu et al., 2017	POT	≤3 months	Residues	Level 2	strongly alcaline	high	Medium	acid			Level 1	low		>1% ≤10%		Cd concentration	130	>50 mg/kg ≤500 mg/kg			590	>500 mg/kg					8.9	≤10 mg/kg			8.19	≤50 mg/kg			41.65	5.41049	3	50	6.49519	3
Xu et al., 2017	POT	≤3 months	Residues	Level 2	strongly alcaline	high	Medium	acid			Level 1	low		>1% ≤10%		Pb	130	>50 mg/kg ≤500 mg/kg			590	>500 mg/kg					8.9	≤10 mg/kg			8.19	≤50 mg/kg									4605	598.207	3	5000	649.519	3
Xu et al., 2017	POT	≤3 months	Residues	Level 2	strongly alcaline	high	Medium	acid			Level 1	low		>1% ≤10%		Cd concentration, Pb	130	>50 mg/kg ≤500 mg/kg			590	>500 mg/kg					8.9	≤10 mg/kg			8.19	≤50 mg/kg			41.65	5.41049	3	50	6.49519	3	4605	598.207	3	5000	649.519	3
Xu et al., 2017	POT	≤3 months	Residues	300-500	strongly alcaline	high	Medium	acid			5	low		>1% ≤10%			130	>50 mg/kg ≤500 mg/kg			590	>500 mg/kg					8.9	≤10 mg/kg			8.19	≤50 mg/kg								3
Mierzwa-Hersztek et al., 2017	POT	> 3 months ≤1 year	Sludge	Level 2	neutral	low	Medium	acid	acid		Level 1		medium	≤1%	≤1%	Cd concentration, Pb, Cu, Zn							0.22	≤5 mg/kg	21.2	≤50 mg/kg	3.3	≤10 mg/kg	1.15	≤5 mg/kg	23.9	≤50 mg/kg	3.01	≤10 mg/kg	0.0125	0.001	3	0.02	0.001	3	0.084	0.0362176	3	0.15	0.001	3	0.0173	0.001	3
Mierzwa-Hersztek et al., 2017	POT	> 3 months ≤1 year	Sludge	Level 2	neutral	low	Medium	acid	acid		Level 1		medium	≤1%	≤1%	Cd concentration, Pb, Cu, Zn							0.22	≤5 mg/kg	21.2	≤50 mg/kg	3.3	≤10 mg/kg	1.15	≤5 mg/kg	23.9	≤50 mg/kg	3.01	≤10 mg/kg	0.01	0.001	3	0.02	0.001	3	0.0526	0.0173228	3	0.15	0.001	3	0.0252	0.001	3
Mierzwa-Hersztek et al., 2017	POT	> 3 months ≤1 year	Sludge	Level 2	neutral	low	Medium	acid	acid		Level 1		medium	≤1%	≤1%	Cd concentration, Pb, Cu, Zn							0.22	≤5 mg/kg	21.2	≤50 mg/kg	3.3	≤10 mg/kg	1.15	≤5 mg/kg	23.9	≤50 mg/kg	3.01	≤10 mg/kg	0.01	0.001	3	0.02	0.001	3	0.0421	0.0291353	3	0.15	0.001	3	0.0197	0.001	3
Mierzwa-Hersztek et al., 2017	POT	> 3 months ≤1 year	Sludge	Level 2	neutral	low	Medium	acid	acid		Level 1		low	≤1%	≤1%	Cd concentration, Pb, Cu, Zn							0.22	≤5 mg/kg	21.2	≤50 mg/kg	3.3	≤10 mg/kg	1.15	≤5 mg/kg	23.9	≤50 mg/kg	3.01	≤10 mg/kg	0.01	0.001	3	0.02	0.001	3	0.0508	0.0188962	3	0.15	0.001	3	0.0132	0.001	3
Mierzwa-Hersztek et al., 2017	POT	> 3 months ≤1 year	Sludge	Level 2	neutral	low	Medium	acid	acid		Level 1		low	≤1%	≤1%	Cd concentration, Pb, Cu, Zn							0.22	≤5 mg/kg	21.2	≤50 mg/kg	3.3	≤10 mg/kg	1.15	≤5 mg/kg	23.9	≤50 mg/kg	3.01	≤10 mg/kg	0.0035	0.001	3	0.02	0.001	3	0.021	0.00866142	3	0.15	0.001	3	0.0118	0.001	3
Mierzwa-Hersztek et al., 2017	POT	> 3 months ≤1 year	Sludge	Level 2	neutral	low	Medium	acid	acid		Level 1		low	≤1%	≤1%	Cd concentration, Pb, Cu, Zn							0.22	≤5 mg/kg	21.2	≤50 mg/kg	3.3	≤10 mg/kg	1.15	≤5 mg/kg	23.9	≤50 mg/kg	3.01	≤10 mg/kg	0.0045	0.001	3	0.02	0.001	3	0.0175	0.00472441	3	0.15	0.001	3	0.0147	0.001	3
Mierzwa-Hersztek et al., 2017	POT	> 3 months ≤1 year	Sludge	Level 2	neutral	low	Medium	acid	acid		Level 1		low	≤1%	≤1%	Cd concentration, Pb, Cu, Zn							0.22	≤5 mg/kg	21.2	≤50 mg/kg	3.3	≤10 mg/kg	1.15	≤5 mg/kg	23.9	≤50 mg/kg	3.01	≤10 mg/kg	0.0085	0.001	3	0.02	0.001	3	0.0491	0.0456665	3	0.15	0.001	3	0.0129	0.001	3
Mierzwa-Hersztek et al., 2017	POT	> 3 months ≤1 year	Sludge	Level 2	neutral	low	Medium	acid	acid		Level 1		low	≤1%	≤1%	Cd concentration, Pb, Cu, Zn							0.22	≤5 mg/kg	21.2	≤50 mg/kg	3.3	≤10 mg/kg	1.15	≤5 mg/kg	23.9	≤50 mg/kg	3.01	≤10 mg/kg	0.0035	0.001	3	0.02	0.001	3	0.021	0.0023622	3	0.15	0.001	3	0.0145	0.001	3
Mierzwa-Hersztek et al., 2017	POT	> 3 months ≤1 year	Sludge	Level 2	neutral	low	Medium	acid	neutral		Level 1		low	≤1%	≤1%	Cd concentration, Pb, Cu, Zn							0.22	≤5 mg/kg	21.2	≤50 mg/kg	3.3	≤10 mg/kg	1.15	≤5 mg/kg	23.9	≤50 mg/kg	3.01	≤10 mg/kg	0.0092	0.001	3	0.02	0.001	3	0.0157	0.00551465	3	0.15	0.001	3	0.0206	0.001	3
Wawra et al., 2017	POT	> 3 months ≤1 year	Grass	Level 2	alcaline		Medium	alcaline			Level 1					Cd Concentration, Pb, Cu, As, Zn			30	≤50 mg/kg			6	>5 mg/kg ≤50 mg/kg	604	>500 mg/kg					687	>500 mg/kg			0.0252	0.0002	4	0.0268	0.0002	4	0.021	0.0014	4	0.0263	0.0022	4	0.1225	0.0019	4
Wawra et al., 2017	POT	> 3 months ≤1 year	Grass	Level 2	alcaline		Medium	alcaline			Level 1					Cd Concentration, Pb, Cu, As, Zn			30	≤50 mg/kg			6	>5 mg/kg ≤50 mg/kg	604	>500 mg/kg					687	>500 mg/kg			0.0247	0.0005	4	0.0268	0.0002	4	0.0232	0.0005	4	0.0263	0.0022	4	0.1184	0.0046	4
Moore et al., 2017	POT	> 3 months ≤1 year	Residues	300-500	alcaline	low	Coarse	acid	acid		1			>1% ≤10%			11	≤50 mg/kg			21	≤50 mg/kg					338	>100 mg/kg			17	≤50 mg/kg
Moore et al., 2017	POT	> 3 months ≤1 year	Residues	300-500	alcaline	low	Coarse	acid	neutral		5			>1% ≤10%			11	≤50 mg/kg			21	≤50 mg/kg					338	>100 mg/kg			17	≤50 mg/kg
Moore et al., 2017	POT	> 3 months ≤1 year	Manure	300-500	strongly alcaline	low	Coarse	acid	acid		1			>1% ≤10%			11	≤50 mg/kg			21	≤50 mg/kg					338	>100 mg/kg			17	≤50 mg/kg
Moore et al., 2017	POT	> 3 months ≤1 year	Manure	300-500	strongly alcaline	low	Coarse	acid	acid		5			>1% ≤10%			11	≤50 mg/kg			21	≤50 mg/kg					338	>100 mg/kg			17	≤50 mg/kg
Moore et al., 2017	POT	> 3 months ≤1 year	Residues	300-500	alcaline	low	Coarse	acid	acid		1			>1% ≤10%
Moore et al., 2017	POT	> 3 months ≤1 year	Residues	300-500	alcaline	low	Coarse	acid	neutral		5			>1% ≤10%
Moore et al., 2017	POT	> 3 months ≤1 year	Manure	300-500	strongly alcaline	low	Coarse	acid	neutral		1			>1% ≤10%
Moore et al., 2017	POT	> 3 months ≤1 year	Manure	300-500	strongly alcaline	low	Coarse	acid	neutral		5			>1% ≤10%
Moore et al., 2017	POT	> 3 months ≤1 year	Residues	300-500	alcaline	low	Coarse	acid	acid		1			>1% ≤10%
Moore et al., 2017	POT	> 3 months ≤1 year	Residues	300-500	alcaline	low	Coarse	acid	neutral		5			>1% ≤10%
Moore et al., 2017	POT	> 3 months ≤1 year	Manure	300-500	strongly alcaline	low	Coarse	acid	acid		1			>1% ≤10%
Moore et al., 2017	POT	> 3 months ≤1 year	Manure	300-500	strongly alcaline	low	Coarse	acid	neutral		5			>1% ≤10%
Moore et al., 2017	POT	> 3 months ≤1 year	Residues	300-500	alcaline	low	Coarse	acid	acid		1			>1% ≤10%
Moore et al., 2017	POT	> 3 months ≤1 year	Residues	300-500	alcaline	low	Coarse	acid	neutral		5			>1% ≤10%
Moore et al., 2017	POT	> 3 months ≤1 year	Manure	300-500	strongly alcaline	low	Coarse	acid	acid		1			>1% ≤10%
Moore et al., 2017	POT	> 3 months ≤1 year	Manure	300-500	strongly alcaline	low	Coarse	acid	neutral		5			>1% ≤10%
Kaurin et al., 2017	POT	> 3 months ≤1 year			alcaline		Coarse	neutral	alcaline		Level 1			>1% ≤10%		Cd, Pb, Zn, Fe							6.7	>5 mg/kg ≤50 mg/kg	1028	>500 mg/kg					686	>500 mg/kg			2.6	0	3	6.7	0.173205	3	411	3.4641	3	1028	48.4974
Kaurin et al., 2017	POT	> 3 months ≤1 year			alcaline		Medium	acid	acid		Level 1			>1% ≤10%		Cd, Pb, Zn, Fe							3	≤5 mg/kg	862	>500 mg/kg					331	>50 mg/kg ≤500 mg/kg			0.5	0	3	3	0.173205	3	191	6.9282	3	862	13.8564
Soja et al., 2017	POT	> 3 months ≤1 year	Wood	Level 2	alcaline		Coarse	alcaline	alcaline	Level 1				≤1%		Cu/available Cu											198	>100 mg/kg																			5.1	0.3	4
Soja et al., 2017	POT	> 3 months ≤1 year	Wood	Level 2	alcaline		Coarse	alcaline	alcaline	Level 2				≤1%		Cu/available Cu											198	>100 mg/kg																			5.3	0.9	4
Soja et al., 2017	POT	> 3 months ≤1 year	Wood	Level 2	strongly acid		Coarse	alcaline	alcaline	Level 2				≤1%		Cu/available Cu											198	>100 mg/kg																			5.9	0.4	4
Soja et al., 2017	POT	> 3 months ≤1 year	Wood	Level 2	strongly acid		Coarse	alcaline	alcaline	Level 2				≤1%		Cu/available Cu											198	>100 mg/kg																			6.8	0.9	4
Soja et al., 2017	POT	> 3 months ≤1 year	Wood	Level 2	strongly acid		Coarse	alcaline	alcaline	Level 2				≤1%		Cu/available Cu											198	>100 mg/kg																			5.2	1.3	4
Soja et al., 2017	POT	> 3 months ≤1 year	Wood	Level 2	strongly acid		Coarse	alcaline	alcaline	Level 2				≤1%		Cu/available Cu											198	>100 mg/kg																			7.5	3.1	4
Soja et al., 2017	POT	> 3 months ≤1 year	Wood	Level 2	alcaline		Coarse	acid	neutral	Level 2				>1% ≤10%		Cu/available Cu											97	>10 mg/kg ≤100 mg/kg																			7.8	2.6	4
Soja et al., 2017	POT	> 3 months ≤1 year	Wood	Level 2	strongly acid		Coarse	acid	neutral	Level 2				>1% ≤10%		Cu/available Cu											97	>10 mg/kg ≤100 mg/kg																			9.5	2.9	4
Soja et al., 2017	POT	> 3 months ≤1 year	Wood	Level 2	strongly acid		Coarse	acid	neutral	Level 2				>1% ≤10%		Cu/available Cu											97	>10 mg/kg ≤100 mg/kg																			9.2	1.5	4
Soja et al., 2017	POT	> 3 months ≤1 year	Wood	Level 2	strongly acid		Coarse	acid	neutral	Level 2				>1% ≤10%		Cu/available Cu											97	>10 mg/kg ≤100 mg/kg																			8.8	1.7	4
Soja et al., 2017	POT	> 3 months ≤1 year	Wood	Level 2	strongly acid		Coarse	acid	neutral	Level 2				>1% ≤10%		Cu/available Cu											97	>10 mg/kg ≤100 mg/kg																			8.5	2.1	4
Moreno-Barriga et al., 2017	POT	> 3 months ≤1 year	Manure	300-500	strongly alcaline		Coarse	strongly acid	alcaline		0.5	low	high	≤1%	≤1%								0.99	≤5 mg/kg	6636	>500 mg/kg	47.3	>10 mg/kg ≤100 mg/kg			1030	>500 mg/kg
Moreno-Barriga et al., 2017	POT	> 3 months ≤1 year	Manure	300-500	strongly alcaline		Coarse	strongly acid	alcaline		1	low	high	≤1%	>1% ≤10%								0.99	≤5 mg/kg	6636	>500 mg/kg	47.3	>10 mg/kg ≤100 mg/kg			1030	>500 mg/kg
Moreno-Barriga et al., 2017	POT	> 3 months ≤1 year	Manure	300-500	strongly alcaline		Coarse	strongly acid	alcaline		0.5	low	high	≤1%	>1% ≤10%								0.99	≤5 mg/kg	6636	>500 mg/kg	47.3	>10 mg/kg ≤100 mg/kg			1030	>500 mg/kg
Moreno-Barriga et al., 2017	POT	> 3 months ≤1 year	Manure	300-500	strongly alcaline		Coarse	strongly acid	alcaline		1	low	high	≤1%	>1% ≤10%								0.99	≤5 mg/kg	6636	>500 mg/kg	47.3	>10 mg/kg ≤100 mg/kg			1030	>500 mg/kg
Moreno-Barriga et al., 2017	POT	> 3 months ≤1 year	Manure	300-500	strongly alcaline		Coarse	strongly acid	alcaline		0.5		low		≤1%
Moreno-Barriga et al., 2017	POT	> 3 months ≤1 year	Manure	300-500	strongly alcaline		Coarse	strongly acid	alcaline		1		low		>1% ≤10%
Moreno-Barriga et al., 2017	POT	> 3 months ≤1 year	Manure	300-500	strongly alcaline		Coarse	strongly acid	alcaline		0.5		low		≤1%
Moreno-Barriga et al., 2017	POT	> 3 months ≤1 year	Manure	300-500	strongly alcaline		Coarse	strongly acid	alcaline		1		low		>1% ≤10%
Maienza et al., 2017	FIELD	>2 years	Wood	Level 2	strongly alcaline		Coarse	acid	acid	Level 2				≤1%	≤1%	Mg2+, Cd concentration, Pb, Cu, Available Cu, Fe, Ni, Zn, Cr					192	>50 mg/kg ≤500 mg/kg													1.109	0.0223607	5	2.5	0.0223607	5	74.19	6.19391	5	20.9	0.849706	5	29.67	0.603738	5
Maienza et al., 2017	FIELD	>2 years	Wood	Level 2	strongly alcaline		Coarse	acid	neutral	Level 2				≤1%	≤1%	Mg2+, Cd concentration, Pb, Cu, Available Cu, Fe, Ni, Zn, Cr					192	>50 mg/kg ≤500 mg/kg													1.25	0.111803	5	2.5	0.0223607	5	70.37	0.626099	5	20.9	0.849706	5	30.87	0.257148	5
Maienza et al., 2017	FIELD	>2 years	Wood	Level 2	strongly alcaline		Coarse	acid	acid	Level 2					≤1%	Mg2+, Cd concentration, Pb, Cu, Available Cu, Fe, Ni, Zn, Cr																			2.86	0.0223607	5	1.25	0.0447214	5	87.3	1.63233	5	17.75	1.05095	5	23.1	0.760263	5
Maienza et al., 2017	FIELD	>2 years	Wood	Level 2	strongly alcaline		Coarse	acid	acid	Level 2					≤1%	Mg2+, Cd concentration, Pb, Cu, Available Cu, Fe, Ni, Zn, Cr																			1.83	0.067082	5	1.25	0.0447214	5	72.88	1.34164	5	17.75	1.05095	5	34.84	0.156525	5
Maienza et al., 2017	FIELD	>2 years	Wood	Level 2	strongly alcaline		Coarse	acid	acid	Level 2					≤1%	Mg2+, Cd concentration, Pb, Cu, Available Cu, Fe, Ni, Zn, Cr																			2.94	0.0223607	5	1.31	0.0223607	5	88.7	0.939149	5	16.68	0.737902	5	24.41	0.64846	5
Maienza et al., 2017	FIELD	>2 years	Wood	Level 2	strongly alcaline		Coarse	acid	neutral	Level 2					≤1%	Mg2+, Cd concentration, Pb, Cu, Available Cu, Fe, Ni, Zn, Cr																			2.83	0.0223607	5	1.31	0.0223607	5	69.35	0.782624	5	16.68	0.737902	5	28.08	0.178885	5
Meier et al., 2015a	POT	≤3 months	Manure	Level 2	strongly alcaline	low	Fine	acid	acid		Level 1		medium	>1% ≤10%		Cu	11	≤50 mg/kg			21	≤50 mg/kg					338	>100 mg/kg			17	≤50 mg/kg															931	351.606	3
Meier et al., 2015a	POT	≤3 months	Residues	Level 2	alcaline	low	Fine	acid	neutral		Level 1		medium	>1% ≤10%		Cu	11	≤50 mg/kg			21	≤50 mg/kg					338	>100 mg/kg			17	≤50 mg/kg															1494	230.363	3
Meier et al., 2015a	POT	≤3 months	Manure	Level 2	strongly alcaline	low	Fine	acid	neutral		Level 1		medium	>1% ≤10%		Cu	11	≤50 mg/kg			21	≤50 mg/kg					338	>100 mg/kg			17	≤50 mg/kg															632	43.3013	3
Meier et al., 2015a	POT	≤3 months	Residues	Level 2	alcaline	low	Fine	acid	neutral		Level 1		medium	>1% ≤10%		Cu	11	≤50 mg/kg			21	≤50 mg/kg					338	>100 mg/kg			17	≤50 mg/kg															1212	259.808	3
Meier et al., 2015b	POT	≤3 months	Manure	Level 2	strongly alcaline	low	Coarse	acid	neutral		Level 1		medium	>1% ≤10%		Cu	11	≤50 mg/kg			21	≤50 mg/kg					338	>100 mg/kg			17	≤50 mg/kg															0.135598	0.0554991	3
Meier et al., 2015b	POT	≤3 months	Manure	Level 2	strongly alcaline	low	Coarse	acid	neutral		Level 1		medium	>1% ≤10%		Cu	11	≤50 mg/kg			21	≤50 mg/kg					338	>100 mg/kg			17	≤50 mg/kg															0.27293	0.0317138	3
Meier et al., 2015b	POT	≤3 months	Manure	300-500	strongly alcaline	low	Coarse	acid			5			>1% ≤10%
Meier et al., 2015b	POT	≤3 months	Manure	Level 2	strongly alcaline	low	Coarse	acid	neutral		Level 2		medium	>1% ≤10%		Cu	11	≤50 mg/kg			21	≤50 mg/kg					338	>100 mg/kg			17	≤50 mg/kg															0.141747	0.0317138	3
Meier et al., 2015b	POT	≤3 months	Manure	Level 2	strongly alcaline	low	Coarse	acid	neutral		Level 2		medium	>1% ≤10%		Cu	11	≤50 mg/kg			21	≤50 mg/kg					338	>100 mg/kg			17	≤50 mg/kg															0.375198	0.0554991	3
Meier et al., 2015b	POT	≤3 months	Manure	Level 2	strongly alcaline	low	Coarse	acid	neutral		Level 2		medium	>1% ≤10%		Cu	11	≤50 mg/kg			21	≤50 mg/kg					338	>100 mg/kg			17	≤50 mg/kg															0.301959	0.0475707	3
Domene et al., 2015	POT	≤3 months	Manure	300-500	alcaline		Coarse	neutral			2			>1% ≤10%
Domene et al., 2015	POT	≤3 months	Manure	300-500	alcaline		Coarse	neutral			14			>1% ≤10%
Domene et al., 2015	POT	≤3 months	Manure	501-700	strongly alcaline		Coarse	neutral			2			>1% ≤10%
Domene et al., 2015	POT	≤3 months	Manure	501-700	strongly alcaline		Coarse	neutral			14			>1% ≤10%
Domene et al., 2015	POT	≤3 months	Residues	300-500	alcaline		Coarse	neutral			2			>1% ≤10%
Domene et al., 2015	POT	≤3 months	Residues	300-500	alcaline		Coarse	neutral			14			>1% ≤10%
Domene et al., 2015	POT	≤3 months	Residues	501-700	strongly alcaline		Coarse	neutral			2			>1% ≤10%
Domene et al., 2015	POT	≤3 months	Residues	501-700	strongly alcaline		Coarse	neutral			14			>1% ≤10%
Domene et al., 2015	POT	≤3 months	Manure	300-500	alcaline		Coarse	neutral			2			>1% ≤10%
Domene et al., 2015	POT	≤3 months	Manure	300-500	alcaline		Coarse	neutral			14			>1% ≤10%
Domene et al., 2015	POT	≤3 months	Manure	501-700	strongly alcaline		Coarse	neutral			2			>1% ≤10%
Domene et al., 2015	POT	≤3 months	Manure	501-700	strongly alcaline		Coarse	neutral			14			>1% ≤10%
Domene et al., 2015	POT	≤3 months	Residues	300-500	neutral		Coarse	neutral			14			>1% ≤10%
Domene et al., 2015	POT	≤3 months	Residues	501-700	strongly alcaline		Coarse	neutral			14			>1% ≤10%
Domene et al., 2015	POT	≤3 months	Wood	300-500	strongly acid		Coarse	neutral			2			>1% ≤10%
Domene et al., 2015	POT	≤3 months	Wood	300-500	strongly acid		Coarse	neutral			14			>1% ≤10%
Domene et al., 2015	POT	≤3 months	Wood	501-700	neutral		Coarse	neutral			2			>1% ≤10%
Domene et al., 2015	POT	≤3 months	Wood	501-700	neutral		Coarse	neutral			14			>1% ≤10%
Domene et al., 2015	POT	≤3 months	Residues	300-500	alcaline		Coarse	neutral			14			>1% ≤10%
Domene et al., 2015	POT	≤3 months	Residues	501-700	strongly alcaline		Coarse	neutral			14			>1% ≤10%
Domene et al., 2015	POT	≤3 months	Wood	300-500	acid		Coarse	neutral			2			>1% ≤10%
Domene et al., 2015	POT	≤3 months	Wood	300-500	acid		Coarse	neutral			14			>1% ≤10%
Domene et al., 2015	POT	≤3 months	Wood	501-700	acid		Coarse	neutral			2			>1% ≤10%
Domene et al., 2015	POT	≤3 months	Wood	501-700	acid		Coarse	neutral			14			>1% ≤10%
Mackie et al., 2015	FIELD	>1 year ≤2 years	Wood	Level 4	strongly alcaline	medium	Fine	alcaline		Level 1				≤1%	≤1%	Cu											150	>100 mg/kg																			117	17.3205	3
Mackie et al., 2015	FIELD	>1 year ≤2 years	Wood	Level 4	strongly alcaline	medium	Fine	neutral		Level 1				≤1%	≤1%	Cu											123	>100 mg/kg																			98	17.3205	3
Cui et al., 2013	FIELD	>1 year ≤2 years	Straw	Level 2	strongly alcaline		Fine	acid	acid	Level 1				>1% ≤10%	>1% ≤10%	Cd, Pb	820	>500 mg/kg			11400	>500 mg/kg	21.84	>5 mg/kg ≤50 mg/kg	603.31	>500 mg/kg									23.83	2.28	3	26.09	1.74	3	539.65	34.64	3	682.69	33.66	3
Cui et al., 2013	FIELD	>1 year ≤2 years	Straw	Level 2	strongly alcaline		Fine	acid	neutral	Level 2				>1% ≤10%	>1% ≤10%	Cd, Pb	820	>500 mg/kg			11400	>500 mg/kg	21.84	>5 mg/kg ≤50 mg/kg	603.31	>500 mg/kg									24.98	2.74	3	26.09	1.74	3	614.18	100.35	3	682.69	33.66	3
Cui et al., 2013	FIELD	>1 year ≤2 years	Straw	Level 2	strongly alcaline		Fine	acid	neutral	Level 2				>1% ≤10%	>1% ≤10%	Cd, Pb	820	>500 mg/kg			11400	>500 mg/kg	21.84	>5 mg/kg ≤50 mg/kg	603.31	>500 mg/kg									24	4.71	3	26.09	1.74	3	551.92	62.58	3	682.69	33.66	3
Khan et al., 2022	POT	≤3 months	Straw	300-500	strongly alcaline			acid	neutral		1	medium		≤1%	>1% ≤10%		500	>50 mg/kg ≤500 mg/kg			13700	>500 mg/kg
Khan et al., 2022	POT	≤3 months	Straw	300-500	strongly alcaline			acid	alcaline		2.5	medium		≤1%	>1% ≤10%		500	>50 mg/kg ≤500 mg/kg			13700	>500 mg/kg
Khan et al., 2022	POT	≤3 months	Straw	300-500	strongly alcaline			acid	acid		1	medium		≤1%	>1% ≤10%		500	>50 mg/kg ≤500 mg/kg			13700	>500 mg/kg
Khan et al., 2022	POT	≤3 months	Straw	300-500	strongly alcaline			acid	alcaline		2.5	medium		≤1%	>1% ≤10%		500	>50 mg/kg ≤500 mg/kg			13700	>500 mg/kg
Xu et al., 2019	INCUBATION	≤3 months	Manure	300-500	strongly alcaline		Fine	acid			1			>1% ≤10%			64	>50 mg/kg ≤500 mg/kg															115	>100 mg/kg
Xu et al., 2019	INCUBATION	≤3 months	Wood	300-500	alcaline		Fine	acid			1			>1% ≤10%			64	>50 mg/kg ≤500 mg/kg															115	>100 mg/kg
Xu et al., 2019	INCUBATION	≤3 months	Manure	300-500	strongly alcaline		Fine	acid			1			>1% ≤10%
Xu et al., 2019	INCUBATION	≤3 months	Wood	300-500	alcaline		Fine	acid			1			>1% ≤10%
Latini et al., 2019	POT	≤3 months	Wood	Level 3	strongly alcaline	high	Coarse	acid	neutral		Level 1		low	>1% ≤10%	>1% ≤10%	Mg2+, Ca2+, Pb, Fe, Zn, K					982	>500 mg/kg			53	>50 mg/kg ≤500 mg/kg					48	≤50 mg/kg									61	0	2	58	0	2
Latini et al., 2019	POT	≤3 months	Wood	Level 3	strongly alcaline	high	Coarse	acid	neutral		Level 1		low	>1% ≤10%	>1% ≤10%	Mg2+, Ca2+, Pb, Fe, Zn, K					982	>500 mg/kg			53	>50 mg/kg ≤500 mg/kg					48	≤50 mg/kg									58	0	2	58	0	2
Latini et al., 2019	POT	≤3 months	Straw	Level 3	strongly alcaline	low	Coarse	acid	neutral		Level 1		medium	>1% ≤10%	>1% ≤10%	Mg2+, Ca2+, Pb, Fe, Zn, K					982	>500 mg/kg			53	>50 mg/kg ≤500 mg/kg					48	≤50 mg/kg									62	0	2	58	0	2
Latini et al., 2019	POT	≤3 months	Wood	Level 3	strongly alcaline	high	Coarse	acid	neutral		Level 1		low	>1% ≤10%	>1% ≤10%	Mg2+, Ca2+, Pb, Fe, Zn, K					982	>500 mg/kg			53	>50 mg/kg ≤500 mg/kg					48	≤50 mg/kg									61	0	2	54	0	2
Latini et al., 2019	POT	≤3 months	Wood	Level 3	strongly alcaline	high	Coarse	acid	neutral		Level 1		low	>1% ≤10%	>1% ≤10%	Mg2+, Ca2+, Pb, Fe, Zn, K					982	>500 mg/kg			53	>50 mg/kg ≤500 mg/kg					48	≤50 mg/kg									60	0	2	54	0	2
Latini et al., 2019	POT	≤3 months	Straw	Level 3	strongly alcaline	low	Coarse	acid	neutral		Level 1		medium	>1% ≤10%	>1% ≤10%	Mg2+, Ca2+, Pb, Fe, Zn, K					982	>500 mg/kg			53	>50 mg/kg ≤500 mg/kg					48	≤50 mg/kg									61	0	2	54	0	2
Zhang et al., 2019	POT	≤3 months	Residues	300-500	alcaline			acid	acid		2			≤1%	>1% ≤10%		49.21	≤50 mg/kg			138.33	>50 mg/kg ≤500 mg/kg
Zhang et al., 2019	POT	≤3 months	Residues	300-500	alcaline			acid	acid		2			≤1%	>1% ≤10%		49.21	≤50 mg/kg			138.33	>50 mg/kg ≤500 mg/kg
Zhang et al., 2019	POT	≤3 months	Residues	300-500	alcaline		Medium	acid	neutral		2			≤1%	≤1%		15.92	≤50 mg/kg			63	>50 mg/kg ≤500 mg/kg
Zhang et al., 2019	POT	≤3 months	Residues	300-500	alcaline		Medium	acid	neutral		2			≤1%	≤1%		15.92	≤50 mg/kg			63	>50 mg/kg ≤500 mg/kg
Zhang et al., 2019	POT	≤3 months	Residues	300-500	alcaline			alcaline	alcaline		2			>1% ≤10%	>1% ≤10%		26.99	≤50 mg/kg			276	>50 mg/kg ≤500 mg/kg
Zhang et al., 2019	POT	≤3 months	Residues	300-500	alcaline			alcaline	alcaline		2			>1% ≤10%	>1% ≤10%		26.99	≤50 mg/kg			276	>50 mg/kg ≤500 mg/kg
Zhang et al., 2019	POT	≤3 months	Residues	300-500	alcaline		Fine	strongly alcaline	strongly alcaline		2			>1% ≤10%	>1% ≤10%		6.99	≤50 mg/kg			249.33	>50 mg/kg ≤500 mg/kg
Zhang et al., 2019	POT	≤3 months	Residues	300-500	alcaline		Fine	strongly alcaline	alcaline		2			>1% ≤10%	>1% ≤10%		6.99	≤50 mg/kg			249.33	>50 mg/kg ≤500 mg/kg
Zhou et al., 2018	POT	> 3 months ≤1 year	Wood	300-500	alcaline		Coarse	alcaline	alcaline		0.5			>1% ≤10%	>1% ≤10%		50	≤50 mg/kg			170	>50 mg/kg ≤500 mg/kg
Zhou et al., 2018	POT	> 3 months ≤1 year	Wood	300-500	alcaline		Coarse	alcaline	alcaline		1			>1% ≤10%	>1% ≤10%		50	≤50 mg/kg			170	>50 mg/kg ≤500 mg/kg
Zhou et al., 2018	POT	> 3 months ≤1 year	Wood	300-500	alcaline		Coarse	alcaline	alcaline		2			>1% ≤10%	>1% ≤10%		50	≤50 mg/kg			170	>50 mg/kg ≤500 mg/kg
Zhou et al., 2018	POT	> 3 months ≤1 year	Wood	300-500	alcaline		Coarse	alcaline	alcaline		4			>1% ≤10%	>1% ≤10%		50	≤50 mg/kg			170	>50 mg/kg ≤500 mg/kg
Xu et al., 2017	POT		Residues	501-700	strongly alcaline	high	Fine	acid			0.5				>10%				32.31	≤50 mg/kg			13.15	>5 mg/kg ≤50 mg/kg	87.28	>50 mg/kg ≤500 mg/kg	38.54	>10 mg/kg ≤100 mg/kg	25.95	>5 mg/kg ≤50 mg/kg	1578.67	>500 mg/kg	114.28	>100 mg/kg
Xu et al., 2017	POT		Residues	501-700	strongly alcaline	high	Fine	acid			1				>10%				32.31	≤50 mg/kg			13.15	>5 mg/kg ≤50 mg/kg	87.28	>50 mg/kg ≤500 mg/kg	38.54	>10 mg/kg ≤100 mg/kg	25.95	>5 mg/kg ≤50 mg/kg	1578.67	>500 mg/kg	114.28	>100 mg/kg
Xu et al., 2017	POT		Residues	501-700	strongly alcaline	high	Fine	acid			2				>10%				32.31	≤50 mg/kg			13.15	>5 mg/kg ≤50 mg/kg	87.28	>50 mg/kg ≤500 mg/kg	38.54	>10 mg/kg ≤100 mg/kg	25.95	>5 mg/kg ≤50 mg/kg	1578.67	>500 mg/kg	114.28	>100 mg/kg
Moreno-Barriga et al., 2017	POT	> 3 months ≤1 year	Manure	300-500	strongly alcaline		Coarse	alcaline	alcaline		0.5		high	>1% ≤10%	≤1%
Moreno-Barriga et al., 2017	POT	> 3 months ≤1 year	Manure	300-500	strongly alcaline		Coarse	alcaline	alcaline		1		low	>1% ≤10%	>1% ≤10%
Moreno-Barriga et al., 2017	POT	> 3 months ≤1 year	Manure	300-500	strongly alcaline		Coarse	alcaline	alcaline		0.5		low	>1% ≤10%	>1% ≤10%
Moreno-Barriga et al., 2017	POT	> 3 months ≤1 year	Manure	300-500	strongly alcaline		Coarse	alcaline	alcaline		1		low	>1% ≤10%	>1% ≤10%
Moreno-Barriga et al., 2017	POT	> 3 months ≤1 year	Manure	300-500	strongly alcaline		Coarse	alcaline	alcaline		0.5		low		≤1%
Moreno-Barriga et al., 2017	POT	> 3 months ≤1 year	Manure	300-500	strongly alcaline		Coarse	alcaline	alcaline		1		low		>1% ≤10%
Moreno-Barriga et al., 2017	POT	> 3 months ≤1 year	Manure	300-500	strongly alcaline		Coarse	alcaline	alcaline		0.5		low		≤1%
Moreno-Barriga et al., 2017	POT	> 3 months ≤1 year	Manure	300-500	strongly alcaline		Coarse	alcaline	alcaline		1		low		>1% ≤10%
Agegnehu et al., 2015	FIELD	> 3 months ≤1 year	Wood	501-700	alcaline		Fine	acid	acid	10		low	low	≤1%			9.6	≤50 mg/kg
Agegnehu et al., 2015	FIELD	> 3 months ≤1 year	Wood	501-700	neutral		Fine	acid	acid	2.5			low
Dicke et al., 2015	FIELD	>1 year ≤2 years	Residues	501-700	strongly alcaline		Coarse	acid	neutral	10.9				≤1%
Dicke et al., 2015	FIELD	>1 year ≤2 years	Wood	>700	strongly alcaline		Coarse	acid	neutral	18.8				≤1%
Fungo et al., 2014	POT	≤3 months	Residues	300-500	strongly alcaline			neutral		15							108700	>500 mg/kg			820	>500 mg/kg									14600	>500 mg/kg
Fungo et al., 2014	POT	≤3 months	Residues	300-500	strongly alcaline			neutral		15							108700	>500 mg/kg			820	>500 mg/kg									14600	>500 mg/kg
Fungo et al., 2014	POT	≤3 months	Residues	501-700	strongly alcaline			neutral		15							108700	>500 mg/kg			820	>500 mg/kg									14600	>500 mg/kg
Fungo et al., 2014	POT	≤3 months	Residues	501-700	strongly alcaline			neutral		15							108700	>500 mg/kg			820	>500 mg/kg									14600	>500 mg/kg
Fungo et al., 2014	POT	≤3 months	Wood	300-500	neutral			neutral		15							108700	>500 mg/kg			820	>500 mg/kg									14600	>500 mg/kg
Fungo et al., 2014	POT	≤3 months	Wood	300-500	neutral			neutral		15							108700	>500 mg/kg			820	>500 mg/kg									14600	>500 mg/kg
Fungo et al., 2014	POT	≤3 months	Wood	501-700	strongly alcaline			neutral		15							108700	>500 mg/kg			820	>500 mg/kg									14600	>500 mg/kg
Fungo et al., 2014	POT	≤3 months	Wood	501-700	strongly alcaline			neutral		15							108700	>500 mg/kg			820	>500 mg/kg									14600	>500 mg/kg
Harter et al., 2013a	POT	≤3 months	Grass	501-700	strongly alcaline	high	Coarse	alcaline			10			≤1%
Ji et al., 2019	POT	≤3 months	Straw	300-500	strongly alcaline		Fine	acid	acid		4			>1% ≤10%
Ji et al., 2019	POT	≤3 months	Straw	300-500	strongly alcaline		Fine	acid	acid		4			>1% ≤10%
Ji et al., 2019	POT	≤3 months	Straw	300-500	strongly alcaline		Fine	neutral	neutral		4			>1% ≤10%
Ji et al., 2019	POT	≤3 months	Straw	300-500	strongly alcaline		Fine	neutral	neutral		4			>1% ≤10%
Ji et al., 2019	POT	≤3 months	Straw	300-500	strongly alcaline		Fine	alcaline	alcaline		4			>1% ≤10%
Ji et al., 2019	POT	≤3 months	Straw	300-500	strongly alcaline		Fine	alcaline	alcaline		4			>1% ≤10%
Kang et al., 2016	POT	≤3 months	Straw	300-500	alcaline		Coarse	acid		0.0247097		medium		>1% ≤10%							183.72	>50 mg/kg ≤500 mg/kg
Kang et al., 2016	POT	≤3 months	Straw	300-500	alcaline		Coarse	acid		0.074129		medium		>1% ≤10%							183.72	>50 mg/kg ≤500 mg/kg
Kang et al., 2016	POT	≤3 months	Straw	300-500	alcaline		Coarse	acid		0.123548		medium		>1% ≤10%							183.72	>50 mg/kg ≤500 mg/kg
Karhu et al., 2011	FIELD	≤3 months	Wood	300-500		low	Medium	neutral		9				>1% ≤10%
Lan et al., 2016	INCUBATION	≤3 months	Wood	>700	strongly acid	medium	Medium	acid	acid		2.5	low	medium	≤1%	≤1%
Lan et al., 2016	INCUBATION	≤3 months	Wood	501-700	alcaline	high	Medium	acid	acid		2.5	low	high	≤1%	≤1%
Lan et al., 2016	INCUBATION	≤3 months	Wood	501-700	strongly alcaline	high	Medium	acid	acid		2.5	low	high	≤1%	≤1%
Lan et al., 2016	INCUBATION	≤3 months	Wood	501-700	strongly alcaline	high	Medium	acid	acid		2.5	low	medium	≤1%	≤1%
Lan et al., 2016	INCUBATION	≤3 months	Residues	501-700	neutral	medium	Medium	acid	acid		2.5	low	high	≤1%	≤1%
Lan et al., 2016	INCUBATION	≤3 months	Grass	300-500	strongly alcaline	high	Medium	acid	acid		2.5	low	high	≤1%	≤1%
Lan et al., 2016	INCUBATION	≤3 months	Wood	501-700	alcaline	high	Medium	acid	acid		2.5	low	medium	≤1%	≤1%
Lan et al., 2016	INCUBATION	≤3 months	Wood	>700	strongly acid	medium	Coarse	acid	acid		2.5	low	medium	≤1%	≤1%
Lan et al., 2016	INCUBATION	≤3 months	Wood	501-700	alcaline	high	Coarse	neutral	neutral		2.5	low	medium	≤1%	≤1%
Lan et al., 2016	INCUBATION	≤3 months	Wood	501-700	strongly alcaline	high	Coarse	alcaline	alcaline		2.5	low	medium	≤1%	≤1%
Lan et al., 2016	INCUBATION	≤3 months	Wood	501-700	strongly alcaline	high	Coarse	neutral	neutral		2.5	low	medium	≤1%	≤1%
Lan et al., 2016	INCUBATION	≤3 months	Residues	501-700	neutral	medium	Coarse	acid	acid		2.5	low	medium	≤1%	≤1%
Lan et al., 2016	INCUBATION	≤3 months	Grass	300-500	strongly alcaline	high	Coarse	neutral	neutral		2.5	low	medium	≤1%	≤1%
Lan et al., 2016	INCUBATION	≤3 months	Wood	501-700	alcaline	high	Coarse	neutral	neutral		2.5	low	medium	≤1%	≤1%
Lentz et al., 2014	FIELD	>2 years	Wood	300-500	neutral	low	Medium	alcaline		24.69		low		>1% ≤10%			4200	>500 mg/kg			26800	>500 mg/kg
Lentz et al., 2014	FIELD	>2 years	Wood	300-500	neutral	low	Medium	alcaline		24.69		low		>1% ≤10%			4200	>500 mg/kg			26800	>500 mg/kg
Liu et al., 2014a	FIELD	≤3 months	Straw	300-500	strongly alcaline		Medium	alcaline	alcaline	20				≤1%	>1% ≤10%
Liu et al., 2014a	FIELD	≤3 months	Straw	300-500	strongly alcaline		Medium	alcaline	alcaline	40				≤1%	>1% ≤10%
Liu et al., 2014a	FIELD	≤3 months	Straw	300-500	strongly alcaline		Medium	alcaline		20				≤1%	>1% ≤10%
Liu et al., 2014a	FIELD	≤3 months	Straw	300-500	strongly alcaline		Medium	alcaline		40				≤1%	>1% ≤10%
Liu et al., 2014a	FIELD	≤3 months	Straw	300-500	strongly alcaline		Medium	alcaline	alcaline	20				≤1%	>1% ≤10%
Liu et al., 2014a	FIELD	≤3 months	Straw	300-500	strongly alcaline		Medium	alcaline	alcaline	40				≤1%	>1% ≤10%
Liu et al., 2015b	INCUBATION	> 3 months ≤1 year	Residues	501-700	alcaline		Coarse	neutral	neutral		0.5			>1% ≤10%	>1% ≤10%
Liu et al., 2015b	INCUBATION	> 3 months ≤1 year	Residues	501-700	alcaline		Coarse	neutral	alcaline		1			>1% ≤10%	>1% ≤10%
Liu et al., 2015b	INCUBATION	> 3 months ≤1 year	Residues	501-700	alcaline		Coarse	neutral	alcaline		2			>1% ≤10%	>1% ≤10%
Liu et al., 2015b	INCUBATION	> 3 months ≤1 year	Residues	501-700	alcaline		Coarse	neutral	alcaline		0.5			>1% ≤10%	>1% ≤10%
Liu et al., 2015b	INCUBATION	> 3 months ≤1 year	Residues	501-700	alcaline		Coarse	neutral	alcaline		1			>1% ≤10%	>1% ≤10%
Liu et al., 2015b	INCUBATION	> 3 months ≤1 year	Residues	501-700	alcaline		Coarse	neutral	alcaline		2			>1% ≤10%	>1% ≤10%
Liu et al., 2015b	INCUBATION	> 3 months ≤1 year	Residues	>700	alcaline		Coarse	neutral	alcaline		0.5			>1% ≤10%	>1% ≤10%
Liu et al., 2015b	INCUBATION	> 3 months ≤1 year	Residues	>700	alcaline		Coarse	alcaline	alcaline		1			>1% ≤10%	>1% ≤10%
Liu et al., 2015b	INCUBATION	> 3 months ≤1 year	Residues	>700	alcaline		Coarse	alcaline	alcaline		2			>1% ≤10%	>1% ≤10%
Martin et al., 2015	INCUBATION	> 3 months ≤1 year	Wood	300-500	alcaline		Coarse	neutral	neutral		1		medium	>1% ≤10%	>1% ≤10%
Martin et al., 2015	INCUBATION	> 3 months ≤1 year	Wood	300-500	alcaline		Coarse	neutral	neutral		3		medium	>1% ≤10%	>1% ≤10%
Martin et al., 2015	INCUBATION	> 3 months ≤1 year	Wood	300-500	alcaline		Coarse	neutral	neutral		1		high
Martin et al., 2015	INCUBATION	> 3 months ≤1 year	Wood	300-500	alcaline		Coarse	neutral	neutral		3		high
Martin et al., 2015	INCUBATION	> 3 months ≤1 year	Wood	300-500	alcaline		Coarse	neutral	neutral		1		high
Martin et al., 2015	INCUBATION	> 3 months ≤1 year	Wood	300-500	alcaline		Coarse	neutral	neutral		3		high
Martin et al., 2015	INCUBATION	> 3 months ≤1 year	Wood	300-500	alcaline		Coarse	neutral	neutral		1		high
Martin et al., 2015	INCUBATION	> 3 months ≤1 year	Wood	300-500	alcaline		Coarse	neutral	acid		3		high
Maucieri et al., 2017	INCUBATION	≤3 months	Wood	300-500	strongly alcaline		Fine	neutral	neutral		5	medium	medium	≤1%	≤1%
Qin et al., 2016	FIELD	>1 year ≤2 years	Straw	350-500	alcaline		Coarse	neutral		5				>1% ≤10%			860	>500 mg/kg			17800	>500 mg/kg
Qin et al., 2016	FIELD	>1 year ≤2 years	Straw	350-500	alcaline		Coarse	neutral		10				>1% ≤10%			860	>500 mg/kg			17800	>500 mg/kg
Qin et al., 2016	FIELD	>1 year ≤2 years	Straw	350-500	alcaline		Coarse	neutral		20				>1% ≤10%			860	>500 mg/kg			17800	>500 mg/kg
Qin et al., 2016	FIELD	>1 year ≤2 years	Straw	350-500	alcaline		Coarse	neutral		5				>1% ≤10%
Qin et al., 2016	FIELD	>1 year ≤2 years	Straw	350-500	alcaline		Coarse	neutral		10				>1% ≤10%
Qin et al., 2016	FIELD	>1 year ≤2 years	Straw	350-500	alcaline		Coarse	neutral		20				>1% ≤10%
Qin et al., 2016	FIELD	>2 years	Straw	350-500	alcaline		Coarse	neutral		5				>1% ≤10%
Qin et al., 2016	FIELD	>2 years	Straw	350-500	alcaline		Coarse	neutral		10				>1% ≤10%
Qin et al., 2016	FIELD	>2 years	Straw	350-500	alcaline		Coarse	neutral		20				>1% ≤10%
Qin et al., 2016	FIELD	>2 years	Straw	350-500	alcaline		Coarse	neutral		5				>1% ≤10%
Qin et al., 2016	FIELD	>2 years	Straw	350-500	alcaline		Coarse	neutral		10				>1% ≤10%
Qin et al., 2016	FIELD	>2 years	Straw	350-500	alcaline		Coarse	neutral		20				>1% ≤10%
Qin et al., 2016	FIELD	>2 years	Straw	350-500	alcaline		Coarse	neutral		5				>1% ≤10%
Qin et al., 2016	FIELD	>2 years	Straw	350-500	alcaline		Coarse	neutral		10				>1% ≤10%
Qin et al., 2016	FIELD	>2 years	Straw	350-500	alcaline		Coarse	neutral		20				>1% ≤10%
Qin et al., 2016	FIELD	>2 years	Straw	350-500	alcaline		Coarse	neutral		5				>1% ≤10%
Qin et al., 2016	FIELD	>2 years	Straw	350-500	alcaline		Coarse	neutral		10				>1% ≤10%
Qin et al., 2016	FIELD	>2 years	Straw	350-500	alcaline		Coarse	neutral		20				>1% ≤10%
Qin et al., 2016	FIELD	>2 years	Straw	350-500	alcaline		Coarse	neutral		5				>1% ≤10%
Qin et al., 2016	FIELD	>2 years	Straw	350-500	alcaline		Coarse	neutral		10				>1% ≤10%
Qin et al., 2016	FIELD	>2 years	Straw	350-500	alcaline		Coarse	neutral		20				>1% ≤10%
Qin et al., 2016	FIELD	>2 years	Straw	350-500	alcaline		Coarse	neutral		5				>1% ≤10%
Qin et al., 2016	FIELD	>2 years	Straw	350-500	alcaline		Coarse	neutral		10				>1% ≤10%
Qin et al., 2016	FIELD	>2 years	Straw	350-500	alcaline		Coarse	neutral		20				>1% ≤10%
Senbayram et al., 2018	INCUBATION	≤3 months	Wood	<300	neutral		Fine	alcaline	alcaline	4				>1% ≤10%
Senbayram et al., 2018	INCUBATION	≤3 months	Residues	<300	strongly alcaline		Fine	alcaline	alcaline	4				>1% ≤10%
Senbayram et al., 2018	INCUBATION	≤3 months	Residues	<300	alcaline		Fine	alcaline	alcaline	4				>1% ≤10%
Senbayram et al., 2018	INCUBATION	≤3 months	Residues	<300	strongly alcaline		Fine	alcaline	alcaline	4				>1% ≤10%
Senbayram et al., 2018	INCUBATION	≤3 months	Wood	<300	neutral		Coarse	acid	acid	4				>1% ≤10%
Senbayram et al., 2018	INCUBATION	≤3 months	Residues	<300	strongly alcaline		Coarse	acid	acid	4				>1% ≤10%
Senbayram et al., 2018	INCUBATION	≤3 months	Residues	<300	alcaline		Coarse	acid	acid	4				>1% ≤10%
Senbayram et al., 2018	INCUBATION	≤3 months	Residues	<300	strongly alcaline		Coarse	acid	acid	4				>1% ≤10%
Sial et al., 2018	INCUBATION	≤3 months	Residues	300-500	strongly alcaline		Fine	alcaline	alcaline		1	medium		≤1%	>1% ≤10%		1540	>500 mg/kg			34650	>500 mg/kg
Sial et al., 2018	INCUBATION	≤3 months	Residues	300-500	strongly alcaline		Fine	alcaline	alcaline		2	medium		≤1%	>1% ≤10%		1540	>500 mg/kg			34650	>500 mg/kg
Suddick & Six, 2013	FIELD	>1 year ≤2 years	Residues	>700	strongly alcaline	high	Coarse	alcaline	alcaline	5				>1% ≤10%	>1% ≤10%						970	>500 mg/kg					53	>10 mg/kg ≤100 mg/kg			84.8	>50 mg/kg ≤500 mg/kg
Suddick & Six, 2013	FIELD	>1 year ≤2 years	Residues	>700	strongly alcaline	high	Coarse	alcaline	alcaline	2.5				>1% ≤10%	>1% ≤10%						970	>500 mg/kg					53	>10 mg/kg ≤100 mg/kg			84.8	>50 mg/kg ≤500 mg/kg
Wang et al., 2020	INCUBATION	≤3 months	Straw	300-500	strongly alcaline		Coarse	acid			0.5			≤1%
Wang et al., 2020	INCUBATION	≤3 months	Straw	300-500	strongly alcaline		Coarse	acid			1			≤1%
Wang et al., 2020	INCUBATION	≤3 months	Straw	300-500	strongly alcaline		Coarse	acid			2			≤1%
Wang et al., 2020	INCUBATION	≤3 months	Straw	300-500	strongly alcaline		Coarse	acid			0.5			≤1%
Wang et al., 2020	INCUBATION	≤3 months	Straw	300-500	strongly alcaline		Coarse	acid			1			≤1%
Wang et al., 2020	INCUBATION	≤3 months	Straw	300-500	strongly alcaline		Coarse	acid			2			≤1%
Wang et al., 2020	INCUBATION	≤3 months	Straw	300-500	strongly alcaline		Coarse	acid			0.5			≤1%
Wang et al., 2020	INCUBATION	≤3 months	Straw	300-500	strongly alcaline		Coarse	acid			1			≤1%
Wang et al., 2020	INCUBATION	≤3 months	Straw	300-500	strongly alcaline		Coarse	acid			2			≤1%
Wang et al., 2020	INCUBATION	≤3 months	Straw	300-500	strongly alcaline		Coarse	acid			0.5			≤1%
Wang et al., 2020	INCUBATION	≤3 months	Straw	300-500	strongly alcaline		Coarse	acid			1			≤1%
Wang et al., 2020	INCUBATION	≤3 months	Straw	300-500	strongly alcaline		Coarse	acid			2			≤1%
Wang et al., 2017	INCUBATION	≤3 months	Straw	300-500	strongly alcaline		Fine	neutral	alcaline		3			≤1%
Wang et al., 2017	INCUBATION	≤3 months	Straw	300-500	strongly alcaline		Fine	neutral	alcaline		3			≤1%
Wang et al., 2017	INCUBATION	≤3 months	Straw	300-500	strongly alcaline		Fine	neutral	alcaline		3			≤1%
Yang et al., 2020	INCUBATION	≤3 months	Straw	300-500	strongly alcaline	high	Fine	acid	neutral		1			≤1%							109.4	>50 mg/kg ≤500 mg/kg
Yang et al., 2020	INCUBATION	≤3 months	Straw	300-500	strongly alcaline	high	Fine	acid	neutral		5			≤1%							109.4	>50 mg/kg ≤500 mg/kg
Yang et al., 2020	INCUBATION	≤3 months	Manure	300-500	strongly alcaline	medium	Fine	acid	neutral		1			≤1%							109.4	>50 mg/kg ≤500 mg/kg
Yang et al., 2020	INCUBATION	≤3 months	Manure	300-500	strongly alcaline	medium	Fine	acid	alcaline		5			≤1%							109.4	>50 mg/kg ≤500 mg/kg
Yang et al., 2020	INCUBATION	≤3 months	Straw	300-500	strongly alcaline	high	Fine	acid	neutral		1			≤1%
Yang et al., 2020	INCUBATION	≤3 months	Straw	300-500	strongly alcaline	high	Fine	acid	neutral		5			≤1%
Yang et al., 2020	INCUBATION	≤3 months	Manure	300-500	strongly alcaline	medium	Fine	acid	neutral		1			≤1%
Yang et al., 2020	INCUBATION	≤3 months	Manure	300-500	strongly alcaline	medium	Fine	acid	neutral		5			≤1%
Yang et al., 2020	INCUBATION	≤3 months	Straw	300-500	strongly alcaline	high	Fine	acid	neutral		1			≤1%
Yang et al., 2020	INCUBATION	≤3 months	Straw	300-500	strongly alcaline	high	Fine	acid	neutral		5			≤1%
Yang et al., 2020	INCUBATION	≤3 months	Manure	300-500	strongly alcaline	medium	Fine	acid	neutral		1			≤1%
Yang et al., 2020	INCUBATION	≤3 months	Manure	300-500	strongly alcaline	medium	Fine	acid	neutral		5			≤1%
Zhang et al., 2010a	FIELD	> 3 months ≤1 year	Straw	300-500	strongly alcaline		Fine	acid	neutral	10				>1% ≤10%	>1% ≤10%
Zhang et al., 2010a	FIELD	> 3 months ≤1 year	Straw	300-500	strongly alcaline		Fine	acid	neutral	40				>1% ≤10%	>1% ≤10%
Zhang et al., 2010a	FIELD	> 3 months ≤1 year	Straw	300-500	strongly alcaline		Fine	acid	neutral	10				>1% ≤10%	>1% ≤10%
Zhang et al., 2010a	FIELD	> 3 months ≤1 year	Straw	300-500	strongly alcaline		Fine	acid	neutral	40				>1% ≤10%	>1% ≤10%
Zhang et al., 2011b	FIELD	≤3 months	Straw	300-500	strongly alcaline	low	Medium	alcaline	alcaline	20				>1% ≤10%	>1% ≤10%
Zhang et al., 2011b	FIELD	≤3 months	Straw	300-500	strongly alcaline	low	Medium	alcaline	alcaline	40				>1% ≤10%	>1% ≤10%
Zhang et al., 2011b	FIELD	≤3 months	Straw	300-500	strongly alcaline	low	Medium	alcaline	alcaline	20				>1% ≤10%	>1% ≤10%
Zhang et al., 2011b	FIELD	≤3 months	Straw	300-500	strongly alcaline	low	Medium	alcaline	alcaline	40				>1% ≤10%	>1% ≤10%
[truncated: 36 more columns]
